# Supplementary material for: Identification of the Novel Methylated Genes’ Signature to Predict Prognosis in INRG High-Risk Neuroblastomas
Source: Hindawi journal article supplement (doi:10.1155/2021/1615201), 2021-09-13
Supplement: f1 [file 1615201.f1.zip]

**Table S1 Multivariate Cox regression analysis of the eight methylated genes signature and survival c**

| gene      | exp(coef) | exp(-coef) | lower .95 | upper .95 | P        |
|-----------|-----------|------------|-----------|-----------|----------|
| NBEA      | 4.87E+03  | 2.05E-04   | 2.34E+01  | 1.01E+06  | 0.0018   |
| DDX28     | 1.19E-17  | 8.41E+16   | 6.82E-25  | 2.07E-10  | 4.63E-06 |
| TMED8     | 4.03E+04  | 2.48E-05   | 1.99E-01  | 8.16E+09  | 0.08896  |
| LOC151174 | 3.35E-03  | 2.98E+02   | 9.28E-06  | 1.21E+00  | 0.05798  |
| EFNB2     | 1.81E+04  | 5.51E-05   | 1.18E+00  | 2.79E+08  | 0.0462   |
| GHRHR     | 2.15E-02  | 4.65E+01   | 4.94E-04  | 9.39E-01  | 0.04627  |
| MIMT1     | 1.08E+02  | 9.23E-03   | 3.09E+00  | 3.80E+03  | 0.00984  |
| SLC29A3   | 2.26E+05  | 4.43E-06   | 1.14E-02  | 4.47E+12  | 0.15047  |

of neuroblastomas patients in the training grou
