# Supplementary material for: Identification of the Novel Methylated Genes’ Signature to Predict Prognosis in INRG High-Risk Neuroblastomas
Source: Hindawi journal article supplement (doi:10.1155/2021/1615201), 2021-09-13
Supplement: f1 [file 1615201.f1.zip]

**Table S4Functional enrichment of the eight methylated genes signature.**

| Go analysis |                           |           |          |          |          |          |            |
|-------------|---------------------------|-----------|----------|----------|----------|----------|------------|
| ID          | Descriptor                | BgRatio   | pvalue   | p.adjust | qvalue   | geneID   | Count      |
| GO:000486   | serine-type endopeptidase | 95/17354  | 0.032404 | 0.072666 | 0.032206 | DDX28    | 1 hsa00380 |
| GO:000486   | endopeptidase             | 173/17354 | 0.05835  | 0.081622 | 0.036176 | DDX28    | 1 hsa00970 |
| GO:006113   | endopeptidase             | 179/17354 | 0.060322 | 0.081622 | 0.036176 | DDX28    | 1 hsa00650 |
| GO:003041   | peptidase                 | 182/17354 | 0.061307 | 0.081622 | 0.036176 | DDX28    | 1 hsa00410 |
| GO:006113   | peptidase                 | 218/17354 | 0.073054 | 0.086752 | 0.03845  | DDX28    | 1 hsa00640 |
| GO:000485   | enzyme inhibitor          | 395/17354 | 0.129046 | 0.129046 | 0.057195 | DDX28    | 1 hsa00250 |
| GO:000486   | triglyceride              | 21/17354  | 0.00724  | 0.054553 | 0.024179 | TMED8    | 1 hsa00280 |
| GO:001921   | deacetylase               | 57/17354  | 0.019549 | 0.058596 | 0.025971 | TMED8    | 1 hsa04727 |
| GO:001623   | lipase activity           | 123/17354 | 0.041786 | 0.075612 | 0.033512 | TMED8    | 1          |
| GO:001717   | serine hydrolase          | 277/17354 | 0.092042 | 0.097155 | 0.043061 | TMED8    | 1          |
| GO:005108   | unfolded protein          | 113/17354 | 0.038444 | 0.075612 | 0.033512 | LOC15117 | 1          |
| GO:000821   | heparin binding           | 160/17354 | 0.054067 | 0.081622 | 0.036176 | LOC15117 | 1          |
| GO:000553   | glycosaminoglycan         | 213/17354 | 0.07143  | 0.086752 | 0.03845  | LOC15117 | 1          |
| GO:190166   | sulfur compound           | 232/17354 | 0.077589 | 0.089345 | 0.039599 | LOC15117 | 1          |
| GO:007188   | 14-3-3 protein            | 25/17354  | 0.008614 | 0.054553 | 0.024179 | EFNB2    | 1          |
| GO:000806   | N-acetyltransferase       | 84/17354  | 0.028697 | 0.072666 | 0.032206 | EFNB2    | 1          |
| GO:001646   | acetyltransferase         | 101/17354 | 0.034421 | 0.072666 | 0.032206 | EFNB2    | 1          |
| GO:001646   | N-acyltransferase         | 101/17354 | 0.034421 | 0.072666 | 0.032206 | EFNB2    | 1          |
| GO:001674   | transferase               | 218/17354 | 0.073054 | 0.086752 | 0.03845  | EFNB2    | 1          |
| GO:001674   | transferase               | 254/17354 | 0.084679 | 0.094641 | 0.041946 | EFNB2    | 1          |
| GO:000216   | aminoacyl-tRNA            | 12/17354  | 0.004142 | 0.054553 | 0.024179 | GHRHR    | 1          |
| GO:000486   | aminoacyl-tRNA            | 43/17354  | 0.014777 | 0.058596 | 0.025971 | GHRHR    | 1          |
| GO:000004   | tRNA binding              | 52/17354  | 0.017847 | 0.058596 | 0.025971 | GHRHR    | 1          |
| GO:001655   | amino acid                | 58/17354  | 0.019889 | 0.058596 | 0.025971 | GHRHR    | 1          |
| GO:014011   | catalytic activity        | 121/17354 | 0.041118 | 0.075612 | 0.033512 | GHRHR    | 1          |
| GO:001687   | ligase activity           | 171/17354 | 0.057693 | 0.081622 | 0.036176 | GHRHR    | 1          |
| GO:003146   | carboxylic acid           | 184/17354 | 0.061963 | 0.081622 | 0.036176 | GHRHR    | 1          |
| GO:004317   | organic acid              | 185/17354 | 0.06229  | 0.081622 | 0.036176 | GHRHR    | 1          |
| GO:014009   | catalytic activity        | 364/17354 | 0.119449 | 0.122677 | 0.054372 | GHRHR    | 1          |
| GO:000848   | transaminase              | 21/17354  | 0.00724  | 0.054553 | 0.024179 | SLC29A3  | 1          |
| GO:001674   | transferase               | 23/17354  | 0.007927 | 0.054553 | 0.024179 | SLC29A3  | 1          |
| GO:003017   | pyridoxal phosphate       | 53/17354  | 0.018188 | 0.058596 | 0.025971 | SLC29A3  | 1          |
| GO:007027   | vitamin B6                | 53/17354  | 0.018188 | 0.058596 | 0.025971 | SLC29A3  | 1          |
| GO:005155   | iron-sulfur               | 63/17354  | 0.021588 | 0.058596 | 0.025971 | SLC29A3  | 1          |
| GO:005154   | metal cluster             | 63/17354  | 0.021588 | 0.058596 | 0.025971 | SLC29A3  | 1          |
| GO:001984   | vitamin binding           | 133/17354 | 0.045118 | 0.077931 | 0.03454  | SLC29A3  | 1          |
| GO:004803   | cofactor binding          | 265/17354 | 0.088206 | 0.095767 | 0.042445 | SLC29A3  | 1          |
| GO:005266   | carboxylic acid           | 140/17354 | 0.000949 | 0.036059 | 0.015982 | TMED8/GH | 2          |

### KEGG analysis

| Descriptor  | BgRatio | pvalue   | p.adjust | qvalue | geneID  | Count |
|-------------|---------|----------|----------|--------|---------|-------|
| Tryptophan  | 40/7528 | 0.015858 | 0.025346 | NA     | EFNB2   | 1     |
| Aminoacyl   | 66/7528 | 0.026075 | 0.0298   | NA     | GHRHR   | 1     |
| Butanoate   | 28/7528 | 0.011118 | 0.025346 | NA     | SLC29A3 | 1     |
| beta-Alani  | 31/7528 | 0.012305 | 0.025346 | NA     | SLC29A3 | 1     |
| Propanoat   | 32/7528 | 0.0127   | 0.025346 | NA     | SLC29A3 | 1     |
| Alanine, as | 35/7528 | 0.013885 | 0.025346 | NA     | SLC29A3 | 1     |
| Valine, leu | 48/7528 | 0.019009 | 0.025346 | NA     | SLC29A3 | 1     |
| GABAergic   | 89/7528 | 0.035055 | 0.035055 | NA     | SLC29A3 | 1     |
