# Supplementary material for: Identification of the Novel Methylated Genes’ Signature to Predict Prognosis in INRG High-Risk Neuroblastomas
Source: Hindawi journal article supplement (doi:10.1155/2021/1615201), 2021-09-13
Supplement: f1 [file 1615201.f1.zip]

**Table S2 The signature risk score composed of eight combinations in the training and test data**

| training group   |          |        |                | Test group       |          |
|------------------|----------|--------|----------------|------------------|----------|
| id               | futime   | fustat | riskScore risk | id               | futime   |
| TARGET.30.PALCBW | 12.50685 | 0      | 9.076763 low   | TARGET.30.PASSRN | 6.10137  |
| TARGET.30.PAPZYP | 6.536986 | 0      | 9.10359 low    | TARGET.30.PAPTMM | 8.728767 |
| TARGET.30.PASCUF | 2.282192 | 1      | 11.51429 high  | TARGET.30.PAMMXF | 0.539726 |
| TARGET.30.PAPRXW | 8.731507 | 0      | 8.90015 low    | TARGET.30.PASLGS | 2.273973 |
| TARGET.30.PAIVHE | 4.39726  | 1      | 11.29485 high  | TARGET.30.PATGWT | 2.542466 |
| TARGET.30.PATGLU | 3.643836 | 1      | 10.6346 high   | TARGET.30.PAPUAR | 8.39726  |
| TARGET.30.PAIVZR | 2.156164 | 1      | 10.63574 high  | TARGET.30.PARACS | 3.638356 |
| TARGET.30.PARDVT | 2.005479 | 0      | 9.792918 low   | TARGET.30.PATDXC | 2.509589 |
| TARGET.30.PARIRD | 0.29589  | 1      | 9.569779 low   | TARGET.30.PAPZYZ | 3.312329 |
| TARGET.30.PASXRJ | 5.032877 | 0      | 9.812423 low   | TARGET.30.PARGUX | 7.517808 |
| TARGET.30.PARXLM | 2.060274 | 1      | 9.650089 low   | TARGET.30.PAPSEI | 5.632877 |
| TARGET.30.PALXTB | 12.66027 | 0      | 9.451135 low   | TARGET.30.PANRVJ | 10.19726 |
| TARGET.30.PAPKWN | 1.273973 | 1      | 11.8145 high   | TARGET.30.PASATK | 3.99726  |
| TARGET.30.PATFXV | 0.810959 | 1      | 11.9685 high   | TARGET.30.PAPVFD | 4.835616 |
| TARGET.30.PAMZMG | 2.090411 | 1      | 12.47894 high  | TARGET.30.PARFWB | 5.030137 |
| TARGET.30.PASRFS | 5.684932 | 0      | 10.45691 high  | TARGET.30.PASXHE | 5.747945 |
| TARGET.30.PASPER | 5.717808 | 0      | 9.933399 low   | TARGET.30.PARVME | 7.049315 |
| TARGET.30.PATDWN | 0.761644 | 0      | 12.4474 high   | TARGET.30.PASAZJ | 6.479452 |
| TARGET.30.PASTCN | 2.830137 | 1      | 10.10845 low   | TARGET.30.PANWRR | 0.945205 |
| TARGET.30.PASWYR | 5.186301 | 0      | 9.577956 low   | TARGET.30.PALZRG | 1.589041 |
| TARGET.30.PASFGG | 1.917808 | 1      | 10.21107 high  | TARGET.30.PALETP | 0.687671 |
| TARGET.30.PASJYB | 1.868493 | 1      | 12.06732 high  | TARGET.30.PASYPX | 6.068493 |
| TARGET.30.PAPTCR | 1.249315 | 1      | 10.2104 high   | TARGET.30.PARDUJ | 7.553425 |
| TARGET.30.PAREGK | 8.342466 | 0      | 9.72922 low    | TARGET.30.PANRHJ | 1.139726 |
| TARGET.30.PARNCW | 2.663014 | 1      | 10.46702 high  | TARGET.30.PARSHT | 7.427397 |
| TARGET.30.PALNVP | 12.78082 | 0      | 9.162132 low   | TARGET.30.PAMYCE | 2.726027 |
| TARGET.30.PALHVD | 1.186301 | 1      | 10.82919 high  | TARGET.30.PARIKF | 7.69863  |
| TARGET.30.PASKJX | 4.608219 | 1      | 8.689781 low   | TARGET.30.PALSAE | 1.79726  |
| TARGET.30.PAPHPE | 1.287671 | 1      | 11.10468 high  | TARGET.30.PASXIE | 5.816438 |
| TARGET.30.PAPWUC | 8.728767 | 0      | 10.40589 high  | TARGET.30.PARGKK | 3.619178 |
| TARGET.30.PARSBI | 4.775342 | 1      | 10.76828 high  | TARGET.30.PAPCTS | 7.221918 |
| TARGET.30.PAPUWY | 3.019178 | 1      | 10.22634 high  | TARGET.30.PASUCB | 5.413699 |
| TARGET.30.PATESI | 2.624658 | 1      | 11.78988 high  | TARGET.30.PAMCXF | 1.967123 |
| TARGET.30.PAPBGH | 1.980822 | 1      | 10.17828 high  | TARGET.30.PARHYL | 7.50411  |
| TARGET.30.PANUIF | 10.20822 | 0      | 9.040491 low   | TARGET.30.PAPTFZ | 2.134247 |
| TARGET.30.PARURB | 1.983562 | 1      | 12.98307 high  | TARGET.30.PASVRU | 1.205479 |
| TARGET.30.PASGPY | 3.939726 | 1      | 9.600373 low   | TARGET.30.PATNKP | 4.243836 |
| TARGET.30.PAPEFE | 0.410959 | 1      | 11.338 high    | TARGET.30.PASDZJ | 0.90411  |
| TARGET.30.PASUYG | 6.008219 | 0      | 7.434864 low   | TARGET.30.PARRBU | 2.484932 |
| TARGET.30.PALZZV | 5.29863  | 0      | 9.142513 low   | TARGET.30.PASJZC | 5.706849 |
| TARGET.30.PAPKXS | 6.531507 | 1      | 10.00998 low   | TARGET.30.PARKGJ | 4.482192 |
| TARGET.30.PAPUNH | 8.10411  | 0      | 10.40841 high  | TARGET.30.PARBGP | 5.586301 |
| TARGET.30.PATCFL | 5.821918 | 0      | 10.00145 low   | TARGET.30.PARZIP | 6.879452 |
| TARGET.30.PANBSP | 1.805479 | 1      | 12.90174 high  | TARGET.30.PANRRW | 5.967123 |
| TARGET.30.PAPVXS | 0.613699 | 1      | 9.631704 low   |                  |          |
| TARGET.30.PANYGR | 0.775342 | 1      | 12.90798 high  |                  |          |
| TARGET.30.PARNTS | 5.649315 | 0      | 9.921958 low   |                  |          |
| TARGET.30.PARYNK | 6.441096 | 0      | 10.28975 high  |                  |          |
| TARGET.30.PALBFW | 2.939726 | 1      | 11.21339 high  |                  |          |
| TARGET.30.PAPEAV | 9.484932 | 0      | 9.699496 low   |                  |          |
| TARGET.30.PANZPV | 3.454795 | 1      | 9.851809 low   |                  |          |
| TARGET.30.PAPBZI | 1.178082 | 1      | 12.13745 high  |                  |          |
| TARGET.30.PANKFE | 1.10137  | 0      | 10.75844 high  |                  |          |

|                  |          |   |          |      |
|------------------|----------|---|----------|------|
| TARGET.30.PATFCY | 2.156164 | 1 | 11.36827 | high |
| TARGET.30.PALUDH | 11.79726 | 0 | 8.732901 | low  |
| TARGET.30.PASTKC | 5.347945 | 0 | 9.735079 | low  |
| TARGET.30.PAPBJE | 9.49863  | 0 | 9.561044 | low  |
| TARGET.30.PAPTLV | 1.575342 | 1 | 13.16049 | high |
| TARGET.30.PASWFB | 0.238356 | 1 | 11.93395 | high |
| TARGET.30.PALIIN | 3.821918 | 1 | 10.63992 | high |
| TARGET.30.PARAHE | 6.115068 | 1 | 9.232984 | low  |
| TARGET.30.PASNZU | 4.635616 | 1 | 9.248463 | low  |
| TARGET.30.PASSRS | 3.613699 | 1 | 11.38354 | high |
| TARGET.30.PAITCI | 0.887671 | 1 | 11.08038 | high |
| TARGET.30.PASMNT | 4.646575 | 1 | 9.623486 | low  |
| TARGET.30.PAPTIP | 4.087671 | 1 | 10.71141 | high |
| TARGET.30.PAPSKM | 2.791781 | 1 | 10.21879 | high |
| TARGET.30.PAMZGT | 10.47397 | 0 | 9.912182 | low  |
| TARGET.30.PARDIW | 7.750685 | 0 | 8.378523 | low  |
| TARGET.30.PASWIJ | 5.315068 | 0 | 7.826455 | low  |
| TARGET.30.PARNEE | 0.871233 | 1 | 10.91594 | high |
| TARGET.30.PANUKV | 1.106849 | 1 | 12.27515 | high |
| TARGET.30.PANNMS | 9.613699 | 0 | 8.068428 | low  |
| TARGET.30.PANZVU | 2.558904 | 1 | 10.15128 | low  |
| TARGET.30.PARDYU | 3.057534 | 1 | 10.92307 | high |
| TARGET.30.PARABN | 2.265753 | 1 | 10.61433 | high |
| TARGET.30.PASHFA | 0.912329 | 1 | 10.33156 | high |
| TARGET.30.PASNEF | 6.063014 | 0 | 8.775275 | low  |
| TARGET.30.PARETE | 0.715068 | 1 | 13.3025  | high |
| TARGET.30.PATHVK | 4.950685 | 0 | 8.071939 | low  |
| TARGET.30.PARSRJ | 7.115068 | 0 | 9.023651 | low  |
| TARGET.30.PASCLP | 6.213699 | 0 | 9.58426  | low  |
| TARGET.30.PAPTLY | 8.09589  | 0 | 9.303939 | low  |
| TARGET.30.PARGDJ | 2.139726 | 1 | 8.079326 | low  |
| TARGET.30.PAPTLN | 7.339726 | 1 | 9.942099 | low  |
| TARGET.30.PALEVG | 13.55616 | 0 | 10.09922 | low  |

| set.<br>oup<br>fustat | riskScore | risk |
|-----------------------|-----------|------|
| 0                     | 10.03909  | low  |
| 0                     | 10.39719  | high |
| 1                     | 8.884267  | low  |
| 1                     | 10.56437  | high |
| 1                     | 10.55753  | high |
| 0                     | 9.89009   | low  |
| 0                     | 10.69592  | high |
| 1                     | 9.137808  | low  |
| 0                     | 9.779817  | low  |
| 0                     | 6.374492  | low  |
| 1                     | 11.35847  | high |
| 0                     | 9.68078   | low  |
| 1                     | 9.66391   | low  |
| 1                     | 10.54026  | high |
| 1                     | 9.96613   | low  |
| 0                     | 9.989968  | low  |
| 0                     | 9.356453  | low  |
| 0                     | 10.43071  | high |
| 1                     | 8.144129  | low  |
| 1                     | 12.62187  | high |
| 1                     | 11.70674  | high |
| 0                     | 9.95959   | low  |
| 0                     | 10.02105  | low  |
| 1                     | 10.21229  | high |
| 0                     | 9.123099  | low  |
| 1                     | 10.81251  | high |
| 0                     | 12.41879  | high |
| 1                     | 11.2022   | high |
| 0                     | 12.17132  | high |
| 1                     | 9.864869  | low  |
| 1                     | 10.01579  | low  |
| 0                     | 8.854735  | low  |
| 1                     | 10.30192  | high |
| 0                     | 7.01376   | low  |
| 1                     | 11.5172   | high |
| 1                     | 11.55884  | high |
| 1                     | 10.50072  | high |
| 1                     | 10.33642  | high |
| 1                     | 11.78404  | high |
| 0                     | 8.745481  | low  |
| 1                     | 9.974161  | low  |
| 1                     | 8.683938  | low  |
| 0                     | 11.07301  | high |
| 0                     | 9.983806  | low  |
