# Supplementary material for: Identification of the Novel Methylated Genes’ Signature to Predict Prognosis in INRG High-Risk Neuroblastomas
Source: Hindawi journal article supplement (doi:10.1155/2021/1615201), 2021-09-13

**FigureS1. Random survival forests-variable hunting analysis reveals the error rate for the data as a function of trees.**

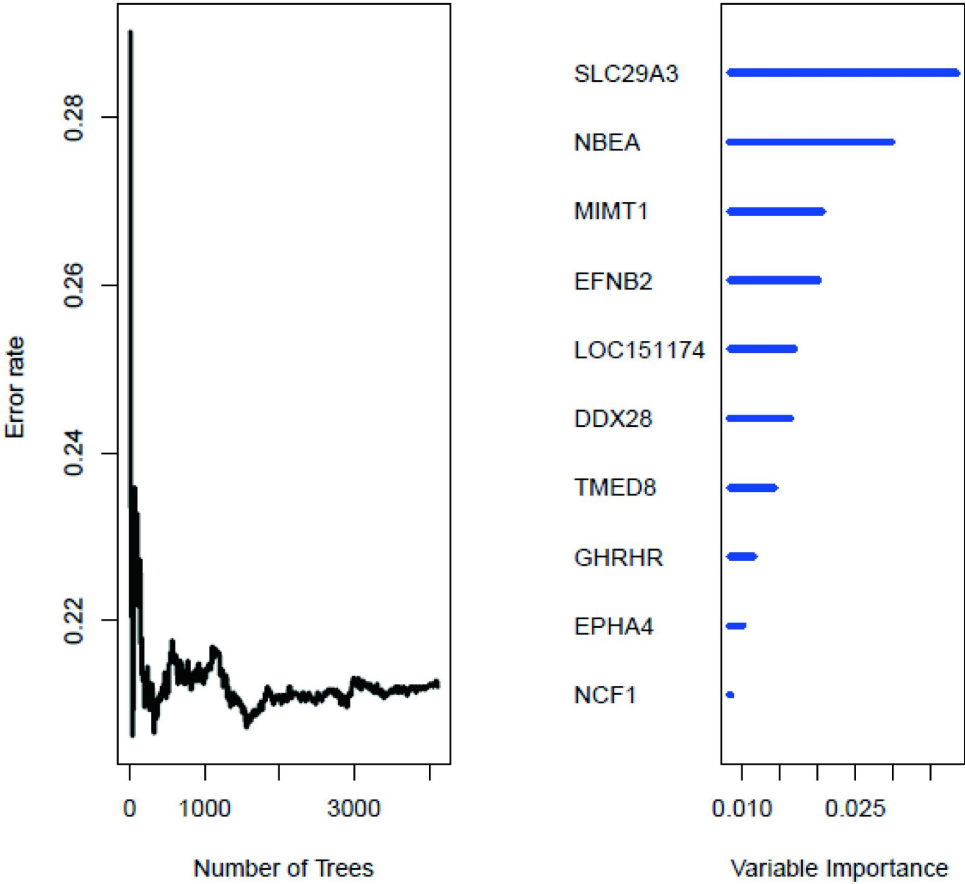

Supplement: f1 [file 1615201.f1.zip]
