# Supplementary material for: Identification of the Novel Methylated Genes’ Signature to Predict Prognosis in INRG High-Risk Neuroblastomas
Source: Hindawi journal article supplement (doi:10.1155/2021/1615201), 2021-09-13
Supplement: f1 [file 1615201.f1.zip]

Archive with 5 entries (5 files):
- 1615201.f1/Figure S1.pdf
- 1615201.f1/Table S1.pdf
- 1615201.f1/Table S2 .pdf
- 1615201.f1/Table S3.pdf
- 1615201.f1/Table S4 .pdf
