# Supplementary material for: Identification of the Novel Methylated Genes’ Signature to Predict Prognosis in INRG High-Risk Neuroblastomas
Source: Hindawi journal article supplement (doi:10.1155/2021/1615201), 2021-09-13
Supplement: f1 [file 1615201.f1.zip › 1615201.f1/Table S3.pdf]

**Table S3The different DNA methylation genes between the high and low risk group**

| gene     | normalMe | TumorMe  | logFC    | pValue   |
|----------|----------|----------|----------|----------|
| C9orf131 | 0.480189 | 0.469726 | -0.03178 | 0.461861 |
| ARRDC3   | 0.393381 | 0.414626 | 0.075883 | 0.066881 |
| NDUFA10  | 0.401625 | 0.402607 | 0.003526 | 0.751496 |
| DHX58    | 0.279196 | 0.2627   | -0.08786 | 0.014966 |
| MEGF8    | 0.423724 | 0.423161 | -0.00192 | 0.823123 |
| NRAP     | 0.631011 | 0.609465 | -0.05012 | 0.053284 |
| LCE3A    | 0.194941 | 0.206702 | 0.084513 | 0.656515 |
| GPR21    | 0.753981 | 0.75602  | 0.003897 | 0.837647 |
| UBE2K    | 0.312864 | 0.311287 | -0.00729 | 0.874194 |
| WDR54    | 0.141013 | 0.145497 | 0.045165 | 0.133138 |
| TBC1D2   | 0.342213 | 0.328153 | -0.06052 | 0.066881 |
| SPTAN1   | 0.175918 | 0.183001 | 0.056951 | 0.085726 |
| NDUFA4L2 | 0.138354 | 0.149694 | 0.113651 | 0.4151   |
| LIPJ     | 0.523897 | 0.531334 | 0.020336 | 0.514425 |
| GIMAP2   | 0.111391 | 0.101215 | -0.13822 | 0.461861 |
| STK38L   | 0.238768 | 0.243018 | 0.025457 | 0.460445 |
| NR0B1    | 0.164099 | 0.179588 | 0.130118 | 0.540288 |
| ENY2     | 0.148234 | 0.143088 | -0.05097 | 0.360151 |
| CHCHD1   | 0.133387 | 0.126945 | -0.0714  | 0.247177 |
| CHRNA1   | 0.651912 | 0.640407 | -0.02569 | 0.254863 |
| C16orf67 | 0.230698 | 0.229292 | -0.00882 | 0.787085 |
| SYNPO2   | 0.403694 | 0.39999  | -0.0133  | 0.294733 |
| MANSC1   | 0.099122 | 0.095392 | -0.05533 | 0.181379 |
| RPL36A   | 0.080385 | 0.091817 | 0.191841 | 0.142389 |
| CLC      | 0.274692 | 0.296363 | 0.10955  | 0.707752 |
| SCNN1D   | 0.45706  | 0.453398 | -0.01161 | 0.624862 |
| DHCR7    | 0.408004 | 0.402315 | -0.02026 | 0.357712 |
| SCRN3    | 0.881583 | 0.895165 | 0.022058 | 0.295789 |
| OR5P2    | 0.310672 | 0.346231 | 0.156345 | 0.052714 |
| CCDC15   | 0.138512 | 0.133065 | -0.05788 | 0.064827 |
| SLC10A2  | 0.550474 | 0.552149 | 0.004384 | 0.817691 |
| ENDOG    | 0.116798 | 0.1191   | 0.028153 | 0.452    |
| ZNF330   | 0.246188 | 0.247496 | 0.007649 | 0.554236 |
| FARP1    | 0.590597 | 0.584921 | -0.01393 | 0.216309 |
| FAM109A  | 0.346791 | 0.339551 | -0.03044 | 0.143033 |
| KLRK1    | 0.264468 | 0.288863 | 0.127293 | 0.328103 |
| OR7E24   | 0.186375 | 0.178462 | -0.06259 | 0.059604 |
| TMEM38B  | 0.062986 | 0.063088 | 0.002341 | 0.704288 |
| SPRR4    | 0.296259 | 0.289662 | -0.03249 | 0.563635 |
| SLC22A4  | 0.228577 | 0.22514  | -0.02186 | 0.4863   |
| NCRNA001 | 0.22271  | 0.22143  | -0.00832 | 0.981423 |
| PGM2L1   | 0.202626 | 0.203572 | 0.00672  | 0.526516 |
| BIRC3    | 0.253501 | 0.243    | -0.06104 | 0.1495   |
| SRP9     | 0.187299 | 0.186496 | -0.0062  | 0.755033 |
| 1.Sep    | 0.177138 | 0.182128 | 0.040075 | 0.177607 |
| TAF6     | 0.098454 | 0.09866  | 0.003015 | 0.611734 |
| TNFRSF1A | 0.417817 | 0.417587 | -0.0008  | 0.899941 |
| OR2T10   | 0.305653 | 0.290523 | -0.07324 | 0.252929 |
| STT3B    | 0.172581 | 0.169323 | -0.0275  | 0.442257 |
| SLC16A1  | 0.155585 | 0.154639 | -0.0088  | 0.797852 |
| STEAP1   | 0.136806 | 0.145486 | 0.088747 | 0.034896 |
| HECW2    | 0.422137 | 0.424246 | 0.007189 | 0.687081 |
| POLH     | 0.165461 | 0.166448 | 0.008583 | 0.870526 |
| CALB2    | 0.167381 | 0.166093 | -0.01114 | 0.972138 |

|          |          |          |          |          |
|----------|----------|----------|----------|----------|
| FTSJ1    | 0.25604  | 0.268779 | 0.070049 | 0.099722 |
| TM9SF3   | 0.383594 | 0.393525 | 0.036875 | 0.615005 |
| NARF     | 0.109631 | 0.110576 | 0.012385 | 0.619924 |
| CST4     | 0.512817 | 0.505529 | -0.02065 | 0.742678 |
| SIKE1    | 0.084254 | 0.088198 | 0.066009 | 0.17096  |
| SNORD11f | 0.284519 | 0.311585 | 0.131099 | 0.06619  |
| ELOVL2   | 0.257653 | 0.256136 | -0.00852 | 0.649797 |
| C20orf85 | 0.307617 | 0.286489 | -0.10266 | 0.403208 |
| ACAT1    | 0.156795 | 0.162645 | 0.052847 | 0.141137 |
| C6orf47  | 0.328203 | 0.338342 | 0.043892 | 0.086579 |
| DCAF12L2 | 0.417748 | 0.437932 | 0.068073 | 0.150819 |
| STAP1    | 0.432296 | 0.450579 | 0.05976  | 0.192259 |
| DAND5    | 0.40104  | 0.377666 | -0.08664 | 0.177606 |
| MMP7     | 0.657229 | 0.60633  | -0.11629 | 0.082385 |
| DCTPP1   | 0.20931  | 0.221801 | 0.083627 | 0.073362 |
| HINT2    | 0.074421 | 0.075967 | 0.029657 | 0.314468 |
| UBE2V1   | 0.123809 | 0.126755 | 0.033922 | 0.211165 |
| VAT1     | 0.220968 | 0.219066 | -0.01248 | 0.350459 |
| IMPG2    | 0.657337 | 0.693647 | 0.077568 | 0.084042 |
| IL17RD   | 0.498703 | 0.489952 | -0.02554 | 0.252929 |
| OVGP1    | 0.122908 | 0.129981 | 0.080721 | 0.453402 |
| MND1     | 0.053206 | 0.051314 | -0.05224 | 0.526497 |
| MARCKS   | 0.090412 | 0.087116 | -0.05357 | 0.442254 |
| XIRP1    | 0.606717 | 0.585624 | -0.05105 | 0.095021 |
| PTGER1   | 0.335251 | 0.361007 | 0.106784 | 0.193056 |
| C1orf170 | 0.410742 | 0.396747 | -0.05001 | 0.615005 |
| ARL5C    | 0.286033 | 0.26714  | -0.09859 | 0.216311 |
| WDR77    | 0.119232 | 0.115253 | -0.04897 | 0.20032  |
| NCRNA001 | 0.055664 | 0.05607  | 0.010474 | 0.420444 |
| ARHGEF2  | 0.518165 | 0.511526 | -0.0186  | 0.46755  |
| CCL1     | 0.492951 | 0.427405 | -0.20584 | 0.004123 |
| NSUN5C   | 0.350436 | 0.338852 | -0.0485  | 0.156867 |
| METT10D  | 0.229665 | 0.240706 | 0.067739 | 0.050204 |
| AMN      | 0.33451  | 0.335998 | 0.006407 | 0.616643 |
| CDH22    | 0.442803 | 0.405975 | -0.12528 | 0.00275  |
| INPP5A   | 0.662895 | 0.654205 | -0.01904 | 0.061518 |
| SHISA3   | 0.166028 | 0.176033 | 0.084415 | 0.297963 |
| TRIM41   | 0.249045 | 0.244347 | -0.02747 | 0.251001 |
| VNN1     | 0.17399  | 0.193927 | 0.156515 | 0.247178 |
| LOC25541 | 0.116925 | 0.109244 | -0.09803 | 0.271759 |
| ZNF558   | 0.590685 | 0.590558 | -0.00031 | 0.546463 |
| ASH2L    | 0.106244 | 0.107556 | 0.01771  | 0.505454 |
| SEMG1    | 0.169113 | 0.168503 | -0.00522 | 0.483392 |
| KCNJ2    | 0.255478 | 0.228772 | -0.15929 | 0.021553 |
| TTY14    | 0.093312 | 0.103261 | 0.146159 | 0.0883   |
| SLC6A15  | 0.110971 | 0.113943 | 0.038127 | 0.22508  |
| PCDHA6   | 0.608582 | 0.621155 | 0.029502 | 0.211164 |
| CCT5     | 0.251249 | 0.22253  | -0.17512 | 0.000589 |
| CD248    | 0.451868 | 0.405778 | -0.15521 | 0.013061 |
| GABRR2   | 0.719472 | 0.715379 | -0.00823 | 0.624858 |
| THEG     | 0.493017 | 0.450126 | -0.13131 | 0.006265 |
| STRADB   | 0.202039 | 0.203766 | 0.012278 | 0.44781  |
| KIAA0562 | 0.572811 | 0.579564 | 0.016908 | 0.245278 |
| HCG11    | 0.21793  | 0.22517  | 0.047154 | 0.512926 |
| LOC37519 | 0.341702 | 0.37171  | 0.121438 | 0.242455 |
| ENPP2    | 0.436578 | 0.447383 | 0.035274 | 0.468979 |

|          |          |          |          |          |
|----------|----------|----------|----------|----------|
| C21orf59 | 0.114001 | 0.115975 | 0.024769 | 0.283087 |
| MANEAL   | 0.257297 | 0.255803 | -0.0084  | 0.874194 |
| MIR320D1 | 0.437043 | 0.45219  | 0.049155 | 0.618282 |
| RNFT2    | 0.331427 | 0.327204 | -0.0185  | 0.333894 |
| TMEM190  | 0.450724 | 0.44331  | -0.02393 | 0.486303 |
| SLC2A7   | 0.659209 | 0.654518 | -0.0103  | 0.590667 |
| ESRP2    | 0.331798 | 0.343929 | 0.051806 | 0.885214 |
| DIO3     | 0.099241 | 0.099524 | 0.004115 | 0.801449 |
| STAU2    | 0.354639 | 0.353261 | -0.00562 | 0.619924 |
| PSMD3    | 0.045918 | 0.046094 | 0.005506 | 0.585845 |
| THOC2    | 0.094791 | 0.101624 | 0.100416 | 0.592276 |
| SPAG8    | 0.317716 | 0.312543 | -0.02368 | 0.382574 |
| PMPCA    | 0.723056 | 0.717024 | -0.01208 | 0.509922 |
| DHX40P   | 0.485227 | 0.494769 | 0.028096 | 0.35893  |
| RNF169   | 0.115811 | 0.118715 | 0.035733 | 0.324658 |
| GOLGA6D  | 0.434296 | 0.422059 | -0.04123 | 0.416434 |
| C4orf34  | 0.074982 | 0.077295 | 0.043827 | 0.192257 |
| CABIN1   | 0.174776 | 0.171712 | -0.02551 | 0.692228 |
| ASPA     | 0.28122  | 0.292978 | 0.059094 | 0.666643 |
| C16orf45 | 0.39179  | 0.394346 | 0.009382 | 0.493621 |
| JPH1     | 0.518714 | 0.54073  | 0.05997  | 0.067226 |
| KBTBD5   | 0.571407 | 0.585794 | 0.035875 | 0.368771 |
| CXXC4    | 0.14605  | 0.150328 | 0.041657 | 0.310012 |
| NF2      | 0.193923 | 0.195825 | 0.014077 | 0.395392 |
| LYZL2    | 0.522114 | 0.505027 | -0.048   | 0.180619 |
| MXD3     | 0.251601 | 0.248624 | -0.01717 | 0.493622 |
| PRDM11   | 0.436276 | 0.429194 | -0.02361 | 0.382572 |
| FLJ37543 | 0.394302 | 0.398635 | 0.015769 | 0.489222 |
| MCEE     | 0.064407 | 0.06214  | -0.05171 | 0.386392 |
| KLK14    | 0.203945 | 0.217027 | 0.089693 | 0.496566 |
| LOC38869 | 0.266345 | 0.278278 | 0.063228 | 0.343297 |
| IRF1     | 0.243909 | 0.232197 | -0.07099 | 0.070421 |
| GDI1     | 0.23764  | 0.26406  | 0.15209  | 0.120963 |
| TMEM188  | 0.126252 | 0.12609  | -0.00185 | 0.865029 |
| CPE      | 0.260581 | 0.255405 | -0.02895 | 0.324661 |
| KDSR     | 0.164624 | 0.164731 | 0.000934 | 0.659882 |
| IPO7     | 0.141209 | 0.145037 | 0.038581 | 0.237795 |
| NFKBIL1  | 0.139245 | 0.139896 | 0.006728 | 0.361374 |
| EIF3G    | 0.31027  | 0.302473 | -0.03672 | 0.156186 |
| C11orf88 | 0.22662  | 0.222148 | -0.02876 | 0.150158 |
| SLC9A7   | 0.248193 | 0.269122 | 0.116799 | 0.1424   |
| ST7OT2   | 0.616792 | 0.618872 | 0.004855 | 0.70602  |
| RALA     | 0.33277  | 0.338996 | 0.026746 | 0.354073 |
| DUSP13   | 0.682825 | 0.670169 | -0.02699 | 0.020012 |
| NECAP2   | 0.229547 | 0.230375 | 0.005194 | 0.763896 |
| IFI30    | 0.173593 | 0.166799 | -0.0576  | 0.326954 |
| LCN12    | 0.866681 | 0.839678 | -0.04566 | 0.043507 |
| SELL     | 0.16984  | 0.159433 | -0.09123 | 0.232287 |
| SUV39H1  | 0.244329 | 0.259338 | 0.086006 | 0.285181 |
| LGR6     | 0.343718 | 0.324903 | -0.08121 | 0.026329 |
| ATL2     | 0.395977 | 0.40995  | 0.05003  | 0.238722 |
| AURKA    | 0.141355 | 0.143773 | 0.024469 | 0.286233 |
| ERBB3    | 0.189652 | 0.179813 | -0.07686 | 0.133139 |
| MED15    | 0.378707 | 0.379082 | 0.001428 | 0.728639 |
| PPP1R3A  | 0.560976 | 0.541775 | -0.05025 | 0.721654 |
| CPNE3    | 0.181525 | 0.184052 | 0.019947 | 0.649794 |

|           |          |          |          |          |
|-----------|----------|----------|----------|----------|
| LOC22042  | 0.234255 | 0.23867  | 0.026938 | 0.454804 |
| CXorf39   | 0.177418 | 0.180771 | 0.027012 | 0.5955   |
| FAM90A2C  | 0.573222 | 0.572703 | -0.00131 | 0.819501 |
| AMAC1     | 0.313225 | 0.290557 | -0.10838 | 0.080351 |
| ROBO2     | 0.428923 | 0.429261 | 0.001138 | 0.744438 |
| ARL13A    | 0.371012 | 0.389062 | 0.068533 | 0.371257 |
| CPA4      | 0.599487 | 0.598509 | -0.00236 | 0.91101  |
| NFKB2     | 0.068291 | 0.070818 | 0.052421 | 0.095014 |
| NAE1      | 0.324168 | 0.31643  | -0.03486 | 0.246227 |
| ATP5SL    | 0.12837  | 0.130095 | 0.019262 | 0.385117 |
| ZNF560    | 0.207236 | 0.220473 | 0.089329 | 0.105606 |
| CASP6     | 0.17316  | 0.182145 | 0.072977 | 0.095021 |
| NES       | 0.14807  | 0.139571 | -0.08528 | 0.396688 |
| APOE      | 0.288428 | 0.317001 | 0.136277 | 0.039336 |
| TNFRSF17  | 0.482291 | 0.461891 | -0.06235 | 0.118748 |
| SNORA31   | 0.712829 | 0.736103 | 0.046352 | 0.193852 |
| OR3A2     | 0.192973 | 0.193447 | 0.003542 | 0.817692 |
| TDRD7     | 0.274495 | 0.274696 | 0.001052 | 0.951726 |
| DTNA      | 0.562477 | 0.55866  | -0.00982 | 0.778142 |
| MIR877    | 0.875095 | 0.867416 | -0.01272 | 0.532603 |
| ADAMTSL1  | 0.652109 | 0.639426 | -0.02834 | 0.301214 |
| C14orf179 | 0.314615 | 0.29846  | -0.07605 | 0.043031 |
| OR5A1     | 0.16934  | 0.16541  | -0.03387 | 0.476155 |
| TRIM68    | 0.261537 | 0.271915 | 0.056141 | 0.063487 |
| C19orf28  | 0.398725 | 0.408988 | 0.036666 | 0.229567 |
| IQSEC1    | 0.492853 | 0.475732 | -0.05101 | 0.011449 |
| SLC9A11   | 0.226544 | 0.246785 | 0.123463 | 0.103616 |
| PHF21A    | 0.40445  | 0.410857 | 0.022674 | 0.258774 |
| AMACR     | 0.270843 | 0.276602 | 0.030356 | 0.218044 |
| KIR3DL1   | 0.137412 | 0.135366 | -0.02164 | 0.549569 |
| OSBP      | 0.171304 | 0.173456 | 0.018011 | 0.068985 |
| FAM71D    | 0.654117 | 0.661649 | 0.016519 | 0.526515 |
| PXT1      | 0.219899 | 0.216001 | -0.02581 | 0.582655 |
| KRTAP7.1  | 0.360722 | 0.332991 | -0.1154  | 0.300132 |
| NDUFA13   | 0.221301 | 0.227383 | 0.039117 | 0.202787 |
| FUT9      | 0.192404 | 0.200449 | 0.059096 | 0.130157 |
| A1CF      | 0.489033 | 0.52477  | 0.101753 | 0.27687  |
| NICN1     | 0.055399 | 0.057205 | 0.046291 | 0.189885 |
| RBP3      | 0.711373 | 0.703596 | -0.01586 | 0.876026 |
| CEP192    | 0.119122 | 0.115406 | -0.04573 | 0.229564 |
| HAPLN4    | 0.40739  | 0.411476 | 0.0144   | 0.643107 |
| ZNF124    | 0.185033 | 0.172415 | -0.1019  | 0.268724 |
| ARPC4     | 0.159599 | 0.157086 | -0.0229  | 0.269733 |
| ODF2      | 0.315816 | 0.314711 | -0.00506 | 0.977709 |
| TMEM211   | 0.473262 | 0.47154  | -0.00526 | 0.979566 |
| VEGFB     | 0.193228 | 0.197686 | 0.032904 | 0.129567 |
| TMEM117   | 0.469271 | 0.478645 | 0.028535 | 0.1374   |
| TXK       | 0.571661 | 0.606638 | 0.085676 | 0.120963 |
| MSTO1     | 0.17191  | 0.16914  | -0.02344 | 0.668337 |
| VNN2      | 0.201812 | 0.229181 | 0.183476 | 0.157551 |
| SEPHS2    | 0.175201 | 0.20052  | 0.19473  | 0.000142 |
| PARD3B    | 0.459545 | 0.460958 | 0.004429 | 0.990711 |
| MEG8      | 0.601355 | 0.594612 | -0.01627 | 0.174629 |
| PSMA6     | 0.1135   | 0.11745  | 0.049351 | 0.156186 |
| ALDH6A1   | 0.158187 | 0.158049 | -0.00125 | 0.77101  |
| C8orf77   | 0.290573 | 0.284341 | -0.03128 | 0.935048 |

|           |          |          |          |          |
|-----------|----------|----------|----------|----------|
| SLC35E3   | 0.108354 | 0.116506 | 0.104654 | 0.036952 |
| CLEC2D    | 0.263719 | 0.289076 | 0.132449 | 0.012807 |
| C2orf85   | 0.602668 | 0.587798 | -0.03604 | 0.189103 |
| C7orf69   | 0.174707 | 0.185553 | 0.086898 | 0.461862 |
| ACSM4     | 0.531273 | 0.500883 | -0.08498 | 0.154831 |
| MIRLET7C  | 0.718428 | 0.708209 | -0.02067 | 0.606843 |
| MICALL2   | 0.396104 | 0.390704 | -0.0198  | 0.524997 |
| AQP8      | 0.697905 | 0.641125 | -0.12243 | 0.000108 |
| CD1B      | 0.343768 | 0.345904 | 0.008936 | 0.568362 |
| ZNF688    | 0.178928 | 0.1858   | 0.054373 | 0.06619  |
| KPNA3     | 0.133208 | 0.134915 | 0.018373 | 0.32124  |
| MSTO2P    | 0.191429 | 0.186705 | -0.03605 | 0.390232 |
| C1orf84   | 0.087684 | 0.091773 | 0.065746 | 0.163799 |
| POM121L2  | 0.098817 | 0.102204 | 0.04861  | 0.342105 |
| RNF14     | 0.190514 | 0.19452  | 0.03002  | 0.210316 |
| CEND1     | 0.370856 | 0.373673 | 0.010914 | 0.579464 |
| OTUD1     | 0.047024 | 0.049681 | 0.079277 | 0.046242 |
| PVALB     | 0.30367  | 0.28712  | -0.08085 | 0.194654 |
| TOR2A     | 0.308041 | 0.306725 | -0.00617 | 0.781715 |
| AGRN      | 0.53546  | 0.545665 | 0.027237 | 0.471841 |
| SCUBE1    | 0.45685  | 0.432466 | -0.07913 | 0.017659 |
| UBE2J1    | 0.188352 | 0.189967 | 0.012314 | 0.44503  |
| MIR1324   | 0.123227 | 0.117114 | -0.07339 | 0.300132 |
| METTL4    | 0.061398 | 0.06071  | -0.01626 | 0.918398 |
| CEP70     | 0.211393 | 0.217722 | 0.042559 | 0.146239 |
| CEP250    | 0.189878 | 0.186762 | -0.02387 | 0.45903  |
| ABHD6     | 0.315178 | 0.310919 | -0.01963 | 0.830379 |
| C15orf42  | 0.217043 | 0.214413 | -0.01759 | 0.459031 |
| FAM21C    | 0.341324 | 0.336687 | -0.01973 | 0.436747 |
| TMEM55A   | 0.130285 | 0.128177 | -0.02354 | 0.911009 |
| HOXD3     | 0.730034 | 0.725641 | -0.00871 | 0.909163 |
| BZRAP1    | 0.244734 | 0.248182 | 0.020184 | 0.310012 |
| OR5K2     | 0.766307 | 0.827748 | 0.11127  | 0.002269 |
| NCAPG     | 0.107223 | 0.108626 | 0.018751 | 0.618283 |
| FLJ43390  | 0.080311 | 0.077114 | -0.05862 | 0.464698 |
| ACER3     | 0.439814 | 0.457035 | 0.055409 | 0.070783 |
| SQSTM1    | 0.271355 | 0.272279 | 0.004903 | 0.865029 |
| OBP2A     | 0.41684  | 0.459359 | 0.140126 | 0.080754 |
| OBSL1     | 0.554253 | 0.553374 | -0.00229 | 0.721652 |
| MAEA      | 0.547331 | 0.543208 | -0.01091 | 0.428553 |
| RAB11FIP3 | 0.626747 | 0.621229 | -0.01276 | 0.160304 |
| OCM       | 0.549216 | 0.560341 | 0.028932 | 0.844932 |
| USP2      | 0.26688  | 0.255756 | -0.06142 | 0.164506 |
| MSLNL     | 0.409067 | 0.385522 | -0.08552 | 0.182142 |
| PLEKHH3   | 0.281991 | 0.2805   | -0.00765 | 0.850404 |
| MCFD2     | 0.141467 | 0.142302 | 0.008493 | 0.597115 |
| S100A7A   | 0.396981 | 0.378445 | -0.06898 | 0.367534 |
| TBC1D10B  | 0.149403 | 0.150005 | 0.005798 | 0.877864 |
| MRPL1     | 0.080953 | 0.074625 | -0.11743 | 0.260738 |
| HTR3B     | 0.616987 | 0.596581 | -0.04852 | 0.040917 |
| ABHD10    | 0.06759  | 0.065889 | -0.03676 | 0.892573 |
| PLAC1     | 0.738838 | 0.713882 | -0.04957 | 0.230472 |
| UBE3C     | 0.542389 | 0.542852 | 0.00123  | 0.872359 |
| HCRTR1    | 0.376045 | 0.379051 | 0.011484 | 0.449206 |
| C1R       | 0.303668 | 0.298167 | -0.02638 | 0.548016 |
| TLE2      | 0.21539  | 0.212976 | -0.01626 | 0.850404 |

|          |          |          |          |          |
|----------|----------|----------|----------|----------|
| BMP6     | 0.219285 | 0.225221 | 0.038534 | 0.360153 |
| TUBBP5   | 0.141927 | 0.147651 | 0.057048 | 0.579465 |
| HIATL1   | 0.456491 | 0.454792 | -0.00538 | 0.584252 |
| EIF4B    | 0.083809 | 0.084046 | 0.004078 | 0.601969 |
| SOX12    | 0.060642 | 0.061196 | 0.013112 | 0.865027 |
| EME1     | 0.074035 | 0.07539  | 0.026164 | 0.587451 |
| ADAMTSL4 | 0.387824 | 0.392841 | 0.018542 | 0.450599 |
| WDR67    | 0.127687 | 0.120491 | -0.08368 | 0.179863 |
| RNF183   | 0.688641 | 0.658409 | -0.06477 | 0.049661 |
| CHMP2A   | 0.390026 | 0.396266 | 0.022902 | 0.357713 |
| KLF3     | 0.363    | 0.355333 | -0.0308  | 0.424491 |
| NPL      | 0.38957  | 0.401644 | 0.044034 | 0.058356 |
| APOL6    | 0.419548 | 0.416416 | -0.01081 | 0.790669 |
| CRABP2   | 0.217459 | 0.200205 | -0.11927 | 0.006629 |
| WDR27    | 0.533332 | 0.569363 | 0.094315 | 0.000579 |
| PARP10   | 0.578404 | 0.562406 | -0.04047 | 0.040233 |
| RIPK1    | 0.631932 | 0.625947 | -0.01373 | 0.241513 |
| RHBDD2   | 0.415284 | 0.410457 | -0.01687 | 0.486303 |
| UGT1A5   | 0.446763 | 0.437099 | -0.03155 | 0.562063 |
| LOC44033 | 0.348802 | 0.332572 | -0.06874 | 0.028112 |
| ZNF280A  | 0.46445  | 0.43924  | -0.08052 | 0.33623  |
| TNS1     | 0.541037 | 0.535731 | -0.01422 | 0.821311 |
| GNRH2    | 0.660332 | 0.655454 | -0.0107  | 0.638109 |
| RXRG     | 0.21484  | 0.208763 | -0.0414  | 0.487762 |
| MCM7     | 0.217332 | 0.20786  | -0.06429 | 0.273796 |
| MRE11A   | 0.096059 | 0.097447 | 0.020707 | 0.683658 |
| VCAN     | 0.236773 | 0.239256 | 0.015053 | 0.699111 |
| TMTC1    | 0.427399 | 0.430178 | 0.009349 | 0.796054 |
| LOC28537 | 0.15457  | 0.149314 | -0.04991 | 0.267717 |
| KRT72    | 0.345364 | 0.308669 | -0.16205 | 0.049662 |
| ATPGD1   | 0.357837 | 0.34622  | -0.04762 | 0.039558 |
| MIR520C  | 0.203577 | 0.215977 | 0.085302 | 0.421796 |
| OR5AS1   | 0.423995 | 0.452143 | 0.092733 | 0.252931 |
| KIF21B   | 0.406535 | 0.391185 | -0.05553 | 0.201962 |
| DCBLD2   | 0.133966 | 0.139236 | 0.055664 | 0.15483  |
| PCDH24   | 0.591291 | 0.578279 | -0.0321  | 0.023053 |
| DCP1B    | 0.270242 | 0.270753 | 0.002727 | 0.848579 |
| KRT79    | 0.572145 | 0.532585 | -0.10337 | 0.158921 |
| E2F1     | 0.304511 | 0.29696  | -0.03622 | 0.151483 |
| PPARD    | 0.486288 | 0.480632 | -0.01688 | 0.366295 |
| KCNB2    | 0.43252  | 0.434267 | 0.005816 | 0.615005 |
| NR5A1    | 0.528534 | 0.504382 | -0.06748 | 0.002099 |
| LOC92659 | 0.129583 | 0.12107  | -0.09803 | 0.003348 |
| ACOX2    | 0.608065 | 0.617918 | 0.023189 | 0.052427 |
| ZNF114   | 0.155104 | 0.159292 | 0.038443 | 0.344482 |
| C1orf68  | 0.228048 | 0.213964 | -0.09197 | 0.136786 |
| LOC37444 | 0.040247 | 0.040094 | -0.0055  | 0.996284 |
| PCDHB6   | 0.398347 | 0.428725 | 0.106028 | 0.138019 |
| C11orf66 | 0.332209 | 0.338959 | 0.029019 | 0.854056 |
| CSNK1E   | 0.24194  | 0.231238 | -0.06527 | 0.300132 |
| ZNF468   | 0.345401 | 0.340782 | -0.01942 | 0.215446 |
| PLCE1    | 0.36241  | 0.399498 | 0.140565 | 0.005395 |
| GSC      | 0.151142 | 0.173135 | 0.195995 | 0.146888 |
| OC90     | 0.515738 | 0.509174 | -0.01848 | 0.776358 |
| C7orf40  | 0.364076 | 0.353523 | -0.04243 | 0.128394 |
| MIR101.1 | 0.50623  | 0.518761 | 0.03528  | 0.3941   |

|           |          |          |          |          |
|-----------|----------|----------|----------|----------|
| KLHDC7A   | 0.529449 | 0.513971 | -0.0428  | 0.218044 |
| OR10J3    | 0.532414 | 0.563578 | 0.082068 | 0.258774 |
| MVP       | 0.70466  | 0.687795 | -0.03495 | 0.00188  |
| ZNF35     | 0.137094 | 0.131257 | -0.06277 | 0.157548 |
| C10orf113 | 0.542021 | 0.536082 | -0.01589 | 0.685369 |
| OLR1      | 0.27121  | 0.283213 | 0.062477 | 0.383845 |
| PPIL5     | 0.126638 | 0.128815 | 0.024581 | 0.417767 |
| CASP10    | 0.256317 | 0.257062 | 0.004191 | 0.815883 |
| MIR519A2  | 0.185301 | 0.202936 | 0.131161 | 0.495094 |
| ZUFSP     | 0.08804  | 0.088463 | 0.006908 | 0.623213 |
| FGF23     | 0.34314  | 0.351771 | 0.035838 | 0.60035  |
| OR9A2     | 0.694633 | 0.700875 | 0.012907 | 0.972138 |
| ZNF529    | 0.108535 | 0.110002 | 0.019361 | 0.371254 |
| ZNF157    | 0.438948 | 0.443823 | 0.015935 | 0.511426 |
| SPHAR     | 0.91309  | 0.943213 | 0.046826 | 0.010545 |
| TFPI      | 0.428338 | 0.489931 | 0.19383  | 0.002509 |
| AGA       | 0.315743 | 0.321751 | 0.027191 | 0.421795 |
| MIR1.1    | 0.519172 | 0.527002 | 0.021595 | 0.857711 |
| NFIL3     | 0.183549 | 0.186932 | 0.026351 | 0.623214 |
| JMJD1C    | 0.383351 | 0.392367 | 0.033538 | 0.34806  |
| CLIC3     | 0.539316 | 0.540295 | 0.002616 | 0.834011 |
| SCN2A     | 0.536232 | 0.549367 | 0.034913 | 0.147537 |
| SLC17A7   | 0.20586  | 0.217195 | 0.077332 | 0.193055 |
| LOC44017  | 0.87043  | 0.838578 | -0.05378 | 0.015351 |
| BRAF      | 0.283319 | 0.286572 | 0.016468 | 0.683659 |
| C11orf60  | 0.107105 | 0.10505  | -0.02795 | 0.70602  |
| PCSK9     | 0.260005 | 0.264442 | 0.024413 | 0.912856 |
| TSSC4     | 0.321802 | 0.325916 | 0.018325 | 0.408466 |
| LOC14578  | 0.044476 | 0.051265 | 0.204935 | 0.01496  |
| SMEK1     | 0.162339 | 0.162673 | 0.002962 | 0.990711 |
| PLEKHN1   | 0.446824 | 0.473096 | 0.082428 | 0.244335 |
| VGf       | 0.059067 | 0.057815 | -0.03091 | 0.476151 |
| TBX22     | 0.303457 | 0.337105 | 0.151705 | 0.474715 |
| TRPV3     | 0.307726 | 0.333038 | 0.114044 | 0.105607 |
| ZNF395    | 0.206272 | 0.202283 | -0.02817 | 0.629814 |
| FAM157B   | 0.481616 | 0.472394 | -0.02789 | 0.492154 |
| BAHD1     | 0.375121 | 0.370008 | -0.0198  | 0.223309 |
| SYT10     | 0.157491 | 0.161906 | 0.03988  | 0.638109 |
| EPGN      | 0.39715  | 0.436663 | 0.136839 | 0.204443 |
| HOXA11    | 0.149476 | 0.143124 | -0.06264 | 0.454805 |
| MTERF     | 0.097886 | 0.095793 | -0.03119 | 0.454803 |
| CDH23     | 0.510233 | 0.501718 | -0.02428 | 0.168067 |
| NOL4      | 0.164204 | 0.165681 | 0.012924 | 0.453402 |
| GALNTL6   | 0.244593 | 0.247394 | 0.016426 | 0.400591 |
| SMAD5     | 0.313595 | 0.309261 | -0.02008 | 0.523478 |
| NUMB      | 0.332699 | 0.339488 | 0.02914  | 0.413769 |
| SYT7      | 0.503306 | 0.499008 | -0.01237 | 0.471839 |
| PPFIA4    | 0.483006 | 0.465987 | -0.05175 | 0.007945 |
| EEF1A2    | 0.442763 | 0.436001 | -0.0222  | 0.41911  |
| ZFYVE27   | 0.282559 | 0.292011 | 0.047471 | 0.043513 |
| RBBP5     | 0.091112 | 0.088772 | -0.03754 | 0.977709 |
| NDUFB8    | 0.304469 | 0.300753 | -0.01772 | 0.453402 |
| UBE2Q2P2  | 0.008387 | 0.007651 | -0.1325  | 0.925497 |
| ZNF12     | 0.203978 | 0.204793 | 0.005752 | 0.582655 |
| LAMC2     | 0.524043 | 0.511142 | -0.03596 | 0.382575 |
| CCHCR1    | 0.352735 | 0.348861 | -0.01593 | 0.421794 |

|           |          |          |          |          |
|-----------|----------|----------|----------|----------|
| RC3H2     | 0.343812 | 0.351427 | 0.031603 | 0.639773 |
| MXRA8     | 0.300055 | 0.330881 | 0.141083 | 0.043756 |
| NUP54     | 0.193252 | 0.194394 | 0.008503 | 0.673428 |
| GDNF      | 0.178496 | 0.180721 | 0.017872 | 0.624861 |
| GPAM      | 0.431389 | 0.436667 | 0.017544 | 0.631471 |
| C17orf67  | 0.622748 | 0.575278 | -0.11439 | 0.008687 |
| LOC64874  | 0.85485  | 0.873827 | 0.031676 | 0.264696 |
| AIFM3     | 0.375074 | 0.367256 | -0.03039 | 0.378777 |
| AADACL3   | 0.251326 | 0.265867 | 0.081148 | 0.318972 |
| ZNF274    | 0.399769 | 0.406152 | 0.022853 | 0.535676 |
| KIAA0101  | 0.199283 | 0.205676 | 0.045559 | 0.948018 |
| FAM134B   | 0.401007 | 0.408731 | 0.027525 | 0.104109 |
| C16orf59  | 0.290758 | 0.287929 | -0.0141  | 0.55268  |
| HMGH4     | 0.139992 | 0.139637 | -0.00365 | 0.868693 |
| RBM47     | 0.462878 | 0.497669 | 0.104555 | 0.282045 |
| GPR182    | 0.692833 | 0.691971 | -0.0018  | 0.905472 |
| PDC       | 0.564293 | 0.58622  | 0.054996 | 0.318972 |
| BRWD3     | 0.252789 | 0.267311 | 0.080582 | 0.317845 |
| ARL6IP4   | 0.288868 | 0.284641 | -0.02126 | 0.565209 |
| HOXD9     | 0.210369 | 0.175477 | -0.26164 | 0.00828  |
| KERA      | 0.655691 | 0.710413 | 0.115642 | 0.1002   |
| DPP9      | 0.514793 | 0.509579 | -0.01469 | 0.317844 |
| TMC4      | 0.24787  | 0.252305 | 0.025587 | 0.823123 |
| GTDC1     | 0.434697 | 0.442852 | 0.026815 | 0.314467 |
| LOC55064  | 0.142611 | 0.122312 | -0.22152 | 0.1374   |
| LOC15153  | 0.555413 | 0.552545 | -0.00747 | 0.946164 |
| ATXN3     | 0.14331  | 0.144367 | 0.010602 | 0.998142 |
| PNMA3     | 0.310529 | 0.315281 | 0.021913 | 0.52348  |
| COX11     | 0.159465 | 0.161449 | 0.017841 | 0.368771 |
| PCDHB15   | 0.411696 | 0.449108 | 0.125486 | 0.180621 |
| ZNF599    | 0.133913 | 0.130099 | -0.04168 | 0.201137 |
| TAS2R7    | 0.829524 | 0.848479 | 0.032595 | 0.361367 |
| FAM149B1  | 0.174248 | 0.181377 | 0.057845 | 0.163801 |
| CYCSP52   | 0.888881 | 0.884709 | -0.00679 | 0.32809  |
| KIAA0652  | 0.255601 | 0.257952 | 0.013205 | 0.554236 |
| RCAN1     | 0.278662 | 0.275233 | -0.01787 | 0.636446 |
| DIRAS1    | 0.460899 | 0.488102 | 0.082731 | 0.126646 |
| LOC44108  | 0.234085 | 0.242052 | 0.048283 | 0.190676 |
| PDYN      | 0.594138 | 0.529294 | -0.16673 | 0.00905  |
| SERPINE2  | 0.364701 | 0.365149 | 0.001773 | 0.746201 |
| NDRG3     | 0.103588 | 0.099725 | -0.05482 | 0.140505 |
| OR6V1     | 0.182617 | 0.189347 | 0.052214 | 0.537212 |
| PRRX2     | 0.435269 | 0.438418 | 0.010402 | 0.582655 |
| SNORD114  | 0.742864 | 0.790936 | 0.090462 | 0.19626  |
| CPA3      | 0.587861 | 0.638181 | 0.11849  | 0.025092 |
| C14orf138 | 0.219917 | 0.228259 | 0.053709 | 0.33273  |
| GPR6      | 0.167989 | 0.176425 | 0.07069  | 0.011757 |
| MRPL16    | 0.201465 | 0.206441 | 0.035198 | 0.425844 |
| RNF32     | 0.686662 | 0.689894 | 0.006776 | 0.678534 |
| CUEDC1    | 0.576359 | 0.555899 | -0.05214 | 0.027946 |
| PIRT      | 0.564024 | 0.569503 | 0.013946 | 0.885214 |
| RAB1B     | 0.079033 | 0.080172 | 0.020633 | 0.456207 |
| ATP6V0B   | 0.160869 | 0.158351 | -0.02276 | 0.718167 |
| WIPF3     | 0.577836 | 0.56988  | -0.02    | 0.666641 |
| C2orf24   | 0.344426 | 0.342372 | -0.00863 | 0.676832 |
| SYN2      | 0.362151 | 0.363262 | 0.004419 | 0.680243 |

|           |          |          |          |          |
|-----------|----------|----------|----------|----------|
| ZFPL1     | 0.204519 | 0.207516 | 0.020986 | 0.449203 |
| LOC100271 | 0.039671 | 0.040668 | 0.035812 | 0.346853 |
| RYR3      | 0.489512 | 0.486753 | -0.00815 | 0.760345 |
| IL4R      | 0.282734 | 0.277014 | -0.02949 | 0.399289 |
| KCNN4     | 0.291413 | 0.297611 | 0.030362 | 0.481939 |
| H1FNT     | 0.65623  | 0.656183 | -0.0001  | 0.308902 |
| MEGF10    | 0.40602  | 0.439076 | 0.112917 | 0.19226  |
| FLRT1     | 0.703904 | 0.695971 | -0.01635 | 0.611734 |
| TDRD6     | 0.62897  | 0.706429 | 0.167554 | 0.028112 |
| ZNF107    | 0.17923  | 0.186849 | 0.060063 | 0.086151 |
| MMP8      | 0.403469 | 0.425205 | 0.0757   | 0.031439 |
| TNPO1     | 0.182807 | 0.181648 | -0.00917 | 0.792464 |
| SCAMP5    | 0.253375 | 0.258564 | 0.029246 | 0.133138 |
| POFUT1    | 0.139142 | 0.14179  | 0.027205 | 0.249085 |
| SENP6     | 0.367721 | 0.369329 | 0.006296 | 0.649796 |
| NEUROG1   | 0.131706 | 0.121962 | -0.11089 | 0.284134 |
| FAM83G    | 0.23035  | 0.227566 | -0.01755 | 0.850404 |
| MGC14436  | 0.60957  | 0.593256 | -0.03914 | 0.207785 |
| CCDC30    | 0.337838 | 0.339011 | 0.005001 | 0.835829 |
| SCD       | 0.281275 | 0.267772 | -0.07097 | 0.01916  |
| MYH10     | 0.509515 | 0.510563 | 0.002965 | 0.988853 |
| EDN2      | 0.559891 | 0.534868 | -0.06596 | 0.086152 |
| MYOM2     | 0.597711 | 0.572063 | -0.06327 | 0.031623 |
| RFPL4B    | 0.784527 | 0.781849 | -0.00493 | 0.231367 |
| KIAA1024  | 0.200926 | 0.20388  | 0.021061 | 0.484846 |
| LOC64939  | 0.109907 | 0.112055 | 0.027925 | 0.887053 |
| GPC4      | 0.316274 | 0.301784 | -0.06766 | 0.284134 |
| RAG1AP1   | 0.1315   | 0.12952  | -0.02188 | 0.453401 |
| KNCN      | 0.530559 | 0.528847 | -0.00466 | 0.973995 |
| MEGF9     | 0.226961 | 0.231095 | 0.02604  | 0.254867 |
| MOAP1     | 0.118592 | 0.11929  | 0.008467 | 0.779929 |
| LPAR5     | 0.494696 | 0.501806 | 0.020586 | 0.367532 |
| PRPH      | 0.279679 | 0.339406 | 0.279242 | 0.017439 |
| MAS1L     | 0.316091 | 0.304299 | -0.05485 | 0.362603 |
| C6orf225  | 0.435816 | 0.453745 | 0.058161 | 0.047275 |
| GPR78     | 0.344842 | 0.333818 | -0.04688 | 0.241517 |
| QSOX1     | 0.368115 | 0.367045 | -0.0042  | 0.511425 |
| SLC6A4    | 0.14024  | 0.134086 | -0.06474 | 0.089176 |
| OR51F2    | 0.37624  | 0.410038 | 0.124104 | 0.317845 |
| AGK       | 0.168057 | 0.163436 | -0.04022 | 0.108651 |
| AAK1      | 0.345182 | 0.347007 | 0.00761  | 0.581057 |
| SDK2      | 0.539669 | 0.524387 | -0.04144 | 0.040459 |
| C11orf31  | 0.0791   | 0.086922 | 0.136056 | 0.142399 |
| TAP2      | 0.396221 | 0.406507 | 0.036975 | 0.355282 |
| OR1E1     | 0.119047 | 0.112568 | -0.08074 | 0.646449 |
| ALAS1     | 0.317706 | 0.318408 | 0.003184 | 0.985138 |
| CTSE      | 0.597026 | 0.5928   | -0.01025 | 0.311123 |
| CLCC1     | 0.253799 | 0.261461 | 0.04291  | 0.087007 |
| WDR38     | 0.412068 | 0.406184 | -0.02075 | 0.776357 |
| MGAT1     | 0.351772 | 0.352573 | 0.003283 | 0.901785 |
| MXRA7     | 0.292343 | 0.292652 | 0.001522 | 0.966569 |
| KCNC3     | 0.226167 | 0.220908 | -0.03394 | 0.259758 |
| GCNT2     | 0.375412 | 0.395273 | 0.074374 | 0.219791 |
| GLDC      | 0.288001 | 0.283148 | -0.02451 | 0.332731 |
| SLC38A11  | 0.441207 | 0.424625 | -0.05527 | 0.566782 |
| MIR498    | 0.083962 | 0.094502 | 0.170614 | 0.111238 |

|          |          |          |          |          |
|----------|----------|----------|----------|----------|
| SLC15A5  | 0.366051 | 0.404035 | 0.142436 | 0.118199 |
| C12orf35 | 0.197204 | 0.201567 | 0.031571 | 0.211163 |
| PEX16    | 0.205087 | 0.205812 | 0.005092 | 0.566783 |
| CTAGE5   | 0.2013   | 0.200577 | -0.00519 | 0.883376 |
| SLFN5    | 0.120466 | 0.128974 | 0.098451 | 0.141768 |
| MIR1200  | 0.828824 | 0.801421 | -0.04851 | 0.001779 |
| UNC5A    | 0.450342 | 0.452771 | 0.00776  | 0.918398 |
| ZNF469   | 0.646224 | 0.636528 | -0.02181 | 0.62486  |
| SPACA1   | 0.633042 | 0.669717 | 0.081252 | 0.022497 |
| STK17A   | 0.224688 | 0.227776 | 0.019692 | 0.744439 |
| C3orf14  | 0.376351 | 0.378175 | 0.006977 | 0.23503  |
| HSD17B10 | 0.139085 | 0.143441 | 0.044492 | 0.678536 |
| NCRNA001 | 0.042039 | 0.040828 | -0.04218 | 0.403183 |
| C19orf29 | 0.403308 | 0.399491 | -0.01372 | 0.579464 |
| FAM132A  | 0.24073  | 0.249551 | 0.051919 | 0.20947  |
| RABEP2   | 0.268258 | 0.26563  | -0.01421 | 0.521964 |
| ZHX3     | 0.777373 | 0.771323 | -0.01127 | 0.424484 |
| APOA4    | 0.63867  | 0.630947 | -0.01755 | 0.275839 |
| F7       | 0.427225 | 0.438478 | 0.037508 | 0.443645 |
| MSI2     | 0.469382 | 0.461954 | -0.02301 | 0.112813 |
| RASSF5   | 0.302225 | 0.297207 | -0.02415 | 0.447811 |
| EIF3M    | 0.251405 | 0.252235 | 0.004759 | 0.817692 |
| ILDR1    | 0.24198  | 0.255571 | 0.078836 | 0.223312 |
| CYTSA    | 0.284973 | 0.287597 | 0.013221 | 0.584254 |
| COX6B2   | 0.15945  | 0.151914 | -0.06984 | 0.07718  |
| C17orf56 | 0.548598 | 0.54782  | -0.00205 | 0.972138 |
| LENG8    | 0.581219 | 0.573787 | -0.01857 | 0.39152  |
| C12orf23 | 0.168924 | 0.167134 | -0.01537 | 0.338573 |
| BOLL     | 0.525945 | 0.519246 | -0.01849 | 0.66326  |
| HELQ     | 0.046385 | 0.047091 | 0.021785 | 0.624854 |
| SPATA12  | 0.741278 | 0.699153 | -0.08441 | 0.050753 |
| DNAJB9   | 0.788766 | 0.840794 | 0.092155 | 0.382568 |
| AKAP8    | 0.434553 | 0.435235 | 0.002263 | 0.787084 |
| DDX4     | 0.623794 | 0.669856 | 0.102782 | 0.092286 |
| SAP130   | 0.175476 | 0.17657  | 0.008974 | 0.776357 |
| SNORA2B  | 0.705889 | 0.736424 | 0.061095 | 0.087436 |
| RPUSD4   | 0.088941 | 0.091159 | 0.035525 | 0.312234 |
| ZNF177   | 0.26252  | 0.251924 | -0.05944 | 0.016367 |
| NKAIN1   | 0.376016 | 0.371603 | -0.01703 | 0.949872 |
| PABPC1P2 | 0.6706   | 0.723232 | 0.109005 | 0.040916 |
| IL18BP   | 0.475216 | 0.496703 | 0.063802 | 0.019889 |
| GLT1D1   | 0.468698 | 0.474237 | 0.016951 | 0.290461 |
| LYPD6    | 0.368499 | 0.364643 | -0.01518 | 0.247178 |
| ARRDC5   | 0.530316 | 0.508948 | -0.05933 | 0.098292 |
| APOA5    | 0.611654 | 0.595849 | -0.03777 | 0.106611 |
| MIR373   | 0.472731 | 0.505925 | 0.097903 | 0.352867 |
| MMD2     | 0.344104 | 0.330876 | -0.05655 | 0.055624 |
| APOBEC3E | 0.38043  | 0.35369  | -0.10515 | 0.04046  |
| LQK1     | 0.329405 | 0.341829 | 0.053411 | 0.918399 |
| OR10H1   | 0.39484  | 0.40211  | 0.026322 | 0.666643 |
| SHQ1     | 0.261874 | 0.266041 | 0.022775 | 0.560492 |
| CHODL    | 0.222069 | 0.23084  | 0.055882 | 0.141767 |
| BMP5     | 0.611669 | 0.675533 | 0.143277 | 0.032746 |
| DNAJC14  | 0.148469 | 0.150699 | 0.021514 | 0.49509  |
| KIF21A   | 0.184428 | 0.17859  | -0.04641 | 0.552679 |
| GPR50    | 0.286323 | 0.32053  | 0.162817 | 0.077964 |

|           |          |          |          |          |
|-----------|----------|----------|----------|----------|
| BAT5      | 0.242684 | 0.242725 | 0.000242 | 0.610103 |
| CHIA      | 0.22239  | 0.224391 | 0.012924 | 0.850404 |
| EMR4P     | 0.080109 | 0.074116 | -0.11218 | 0.197877 |
| DHRS1     | 0.11593  | 0.116797 | 0.010749 | 0.639771 |
| PRSS12    | 0.23813  | 0.224469 | -0.08523 | 0.148189 |
| MIR1283.1 | 0.105713 | 0.100683 | -0.07033 | 0.147536 |
| RICTOR    | 0.294524 | 0.301024 | 0.031492 | 0.595499 |
| PDIA4     | 0.265957 | 0.266796 | 0.004545 | 0.449206 |
| PIP5KL1   | 0.329206 | 0.306346 | -0.10383 | 0.285183 |
| DCLK3     | 0.662427 | 0.644266 | -0.0401  | 0.015955 |
| HIST2H2A  | 0.05949  | 0.05707  | -0.05993 | 0.740913 |
| MIR302A   | 0.725286 | 0.736082 | 0.021315 | 0.788876 |
| LYSMD1    | 0.202486 | 0.197008 | -0.03957 | 0.277898 |
| PKP3      | 0.631028 | 0.655735 | 0.055408 | 0.373753 |
| PRR23C    | 0.591224 | 0.633408 | 0.09943  | 0.074871 |
| FNDC1     | 0.263686 | 0.258289 | -0.02983 | 0.788877 |
| CEP55     | 0.250333 | 0.256622 | 0.035799 | 0.249083 |
| PRPF39    | 0.229788 | 0.237269 | 0.046219 | 0.283088 |
| C19orf35  | 0.498002 | 0.477394 | -0.06097 | 0.016895 |
| GNB4      | 0.10592  | 0.110446 | 0.060361 | 0.524997 |
| ACBD5     | 0.127137 | 0.129743 | 0.029271 | 0.392809 |
| PRM2      | 0.646174 | 0.6303   | -0.03588 | 0.050477 |
| KLF5      | 0.288192 | 0.297808 | 0.047352 | 0.377518 |
| GSTM5     | 0.531236 | 0.551205 | 0.053239 | 0.210316 |
| UPK1B     | 0.530558 | 0.539681 | 0.024597 | 0.687082 |
| C4orf19   | 0.333541 | 0.352364 | 0.079205 | 0.206945 |
| C2orf14   | 0.759217 | 0.76677  | 0.014281 | 0.571522 |
| FPR2      | 0.153897 | 0.158893 | 0.046097 | 0.656514 |
| KRT6B     | 0.69325  | 0.637776 | -0.12033 | 0.079547 |
| MGC1602f  | 0.897575 | 0.894643 | -0.00472 | 0.12837  |
| TUBA3C    | 0.337571 | 0.374582 | 0.150092 | 0.052147 |
| CSNK2B    | 0.525437 | 0.526629 | 0.003267 | 0.883375 |
| ANKS3     | 0.518974 | 0.519421 | 0.001244 | 0.985138 |
| TNFSF13   | 0.333613 | 0.320484 | -0.05792 | 0.204443 |
| STK39     | 0.452347 | 0.461535 | 0.029008 | 0.108647 |
| KCNE3     | 0.486485 | 0.477783 | -0.02604 | 0.66326  |
| FAM160B1  | 0.322853 | 0.311617 | -0.0511  | 0.135562 |
| PPP2R5C   | 0.38025  | 0.373908 | -0.02426 | 0.100201 |
| NF1       | 0.466627 | 0.481783 | 0.046112 | 0.467548 |
| WFDC13    | 0.3173   | 0.301311 | -0.07459 | 0.291527 |
| EFS       | 0.281428 | 0.263832 | -0.09315 | 0.337401 |
| PURA      | 0.103401 | 0.103912 | 0.007113 | 0.905473 |
| AQP6      | 0.538547 | 0.546738 | 0.021777 | 0.373755 |
| PRKCI     | 0.141579 | 0.145525 | 0.039659 | 0.225087 |
| SPSB2     | 0.054327 | 0.055818 | 0.039043 | 0.17315  |
| TSPO2     | 0.716958 | 0.708009 | -0.01812 | 0.271747 |
| ZNF329    | 0.374838 | 0.380005 | 0.019751 | 0.569941 |
| SF3B4     | 0.130212 | 0.126766 | -0.03869 | 0.592275 |
| CHIT1     | 0.419433 | 0.407023 | -0.04333 | 0.099722 |
| OSCAR     | 0.148346 | 0.152045 | 0.035531 | 0.779928 |
| SNHG7     | 0.169217 | 0.157107 | -0.10713 | 0.059921 |
| TRIM50    | 0.586875 | 0.615117 | 0.067807 | 0.141767 |
| MRPL23    | 0.382519 | 0.373654 | -0.03383 | 0.424492 |
| THUMPD1   | 0.051616 | 0.052867 | 0.034547 | 0.639768 |
| NTNG1     | 0.269053 | 0.26748  | -0.00846 | 0.776357 |
| TOP3B     | 0.261226 | 0.253281 | -0.04456 | 0.145594 |

|           |          |          |          |          |
|-----------|----------|----------|----------|----------|
| MOBKL2A   | 0.663279 | 0.657037 | -0.01364 | 0.774571 |
| PQLC1     | 0.506809 | 0.502084 | -0.01351 | 0.593887 |
| KLRG2     | 0.137443 | 0.138874 | 0.014945 | 0.668335 |
| FBXW10    | 0.26782  | 0.257674 | -0.05572 | 0.454807 |
| MSX1      | 0.133622 | 0.120449 | -0.14973 | 0.011075 |
| IFIT1     | 0.267394 | 0.257404 | -0.05493 | 0.920247 |
| MIR30E    | 0.870876 | 0.889284 | 0.030176 | 0.349243 |
| IER2      | 0.080715 | 0.079332 | -0.02493 | 0.446417 |
| KIF14     | 0.241192 | 0.235616 | -0.03374 | 0.420451 |
| LOC72979  | 0.940625 | 0.947336 | 0.010257 | 0.43229  |
| C14orf135 | 0.093856 | 0.095889 | 0.030916 | 0.264713 |
| RALBP1    | 0.298416 | 0.293874 | -0.02213 | 0.185982 |
| NDUFC1    | 0.052112 | 0.05067  | -0.04049 | 0.468969 |
| TFIP11    | 0.264073 | 0.26507  | 0.005433 | 0.707751 |
| TFB1M     | 0.282381 | 0.296876 | 0.072218 | 0.030892 |
| GDPD2     | 0.554313 | 0.549654 | -0.01218 | 0.854056 |
| NSUN3     | 0.171179 | 0.173826 | 0.022137 | 0.460446 |
| TRIM40    | 0.31496  | 0.307957 | -0.03244 | 0.728639 |
| MIR891B   | 0.528049 | 0.563009 | 0.092484 | 0.474715 |
| TAF1L     | 0.277133 | 0.294049 | 0.085479 | 0.227768 |
| METAP1    | 0.144408 | 0.148818 | 0.0434   | 0.148842 |
| LOC72874  | 0.348385 | 0.348926 | 0.002236 | 0.986996 |
| IGFBP3    | 0.128795 | 0.130895 | 0.023328 | 0.293656 |
| KRT84     | 0.484803 | 0.451605 | -0.10234 | 0.071146 |
| DEFB107A  | 0.136574 | 0.132832 | -0.04008 | 0.589061 |
| DHX29     | 0.107947 | 0.111537 | 0.047191 | 0.061521 |
| CNGB3     | 0.481402 | 0.50511  | 0.069356 | 0.131343 |
| AGBL3     | 0.206125 | 0.213642 | 0.051671 | 0.352864 |
| ANTXR2    | 0.415763 | 0.462532 | 0.153793 | 0.00975  |
| SLC1A6    | 0.215737 | 0.233599 | 0.114756 | 0.429915 |
| TNFSF8    | 0.47531  | 0.410932 | -0.20997 | 0.018571 |
| CT45A6    | 0.237439 | 0.246923 | 0.056505 | 0.305594 |
| TPM2      | 0.373495 | 0.366626 | -0.02678 | 0.232288 |
| WBP11P1   | 0.581737 | 0.590914 | 0.022581 | 0.247177 |
| OCA2      | 0.478977 | 0.484854 | 0.017594 | 0.495091 |
| C12orf67  | 0.811212 | 0.807451 | -0.0067  | 0.30012  |
| SCARNA9L  | 0.505167 | 0.537214 | 0.088737 | 0.254869 |
| ACOT2     | 0.147971 | 0.144625 | -0.033   | 0.4151   |
| PLA2G1B   | 0.18631  | 0.169612 | -0.13546 | 0.030533 |
| HNRNPK    | 0.106732 | 0.106342 | -0.00529 | 0.946164 |
| F8A1      | 0.237709 | 0.239676 | 0.011885 | 0.774574 |
| SEN2      | 0.16363  | 0.166897 | 0.028522 | 0.365061 |
| CCDC112   | 0.132509 | 0.128085 | -0.04899 | 0.16951  |
| GPR64     | 0.225229 | 0.242907 | 0.109017 | 0.101168 |
| LRIT3     | 0.316446 | 0.361897 | 0.19362  | 0.005794 |
| LRBA      | 0.280687 | 0.279899 | -0.00406 | 0.837649 |
| MIR429    | 0.451474 | 0.466504 | 0.047245 | 0.628163 |
| EIF4EBP1  | 0.247122 | 0.239896 | -0.04281 | 0.112287 |
| MGAT3     | 0.510967 | 0.513954 | 0.008409 | 0.453401 |
| B3GALNT1  | 0.219882 | 0.225722 | 0.037819 | 0.152815 |
| KY        | 0.291998 | 0.284797 | -0.03603 | 0.232287 |
| CLEC4GP1  | 0.112453 | 0.111748 | -0.00907 | 0.656513 |
| CYP3A5    | 0.201741 | 0.209666 | 0.055583 | 0.373755 |
| SLC39A13  | 0.323597 | 0.32018  | -0.01531 | 0.646449 |
| PDCD7     | 0.101803 | 0.100911 | -0.0127  | 0.646447 |
| ST6GAL2   | 0.229369 | 0.250578 | 0.127587 | 0.112816 |

|          |          |          |          |          |
|----------|----------|----------|----------|----------|
| TLR9     | 0.625505 | 0.612561 | -0.03017 | 0.029128 |
| PPP1R14B | 0.099323 | 0.101102 | 0.025611 | 0.127807 |
| LOC38858 | 0.279818 | 0.278158 | -0.00858 | 0.885214 |
| IRF7     | 0.540635 | 0.552199 | 0.030532 | 0.568362 |
| TXNDC15  | 0.276638 | 0.285617 | 0.046083 | 0.167353 |
| CXorf61  | 0.639735 | 0.657604 | 0.039744 | 0.460445 |
| ZIM3     | 0.271005 | 0.284286 | 0.069022 | 0.257795 |
| TXLNB    | 0.256816 | 0.283787 | 0.14407  | 0.11441  |
| OSBPL9   | 0.208268 | 0.209673 | 0.009701 | 0.597112 |
| PNKD     | 0.269223 | 0.265852 | -0.01818 | 0.605217 |
| MRPS18A  | 0.206182 | 0.202859 | -0.02344 | 0.382574 |
| ABI3BP   | 0.459082 | 0.496419 | 0.112808 | 0.077964 |
| LRRC66   | 0.676076 | 0.697991 | 0.046022 | 0.282043 |
| CTDSPL2  | 0.055457 | 0.054923 | -0.01395 | 0.666638 |
| APOC3    | 0.427525 | 0.429511 | 0.006685 | 0.581059 |
| LRRC20   | 0.144263 | 0.143266 | -0.01001 | 0.639774 |
| CD22     | 0.311743 | 0.312942 | 0.005537 | 0.938752 |
| PAIP2B   | 0.116886 | 0.118459 | 0.019276 | 0.440876 |
| ZNF853   | 0.438199 | 0.440062 | 0.00612  | 0.611735 |
| ARID2    | 0.316455 | 0.320518 | 0.018405 | 0.771009 |
| GLOD5    | 0.43872  | 0.430171 | -0.02839 | 0.742678 |
| AWAT2    | 0.478378 | 0.422697 | -0.17853 | 0.037165 |
| MSH5     | 0.278898 | 0.272338 | -0.03434 | 0.450602 |
| TRIM23   | 0.050945 | 0.049075 | -0.05392 | 0.538744 |
| TCAP     | 0.497817 | 0.502897 | 0.014646 | 0.648122 |
| ATP6V1G1 | 0.038092 | 0.036155 | -0.07528 | 0.163776 |
| THRAP3   | 0.239305 | 0.238617 | -0.00415 | 0.931345 |
| XK       | 0.368348 | 0.385312 | 0.064956 | 0.161697 |
| RPS24    | 0.220731 | 0.210255 | -0.07015 | 0.081566 |
| CDCA7    | 0.444184 | 0.438363 | -0.01903 | 0.18367  |
| TNFAIP3  | 0.187252 | 0.195413 | 0.061548 | 0.295808 |
| TNNI1    | 0.655177 | 0.642971 | -0.02713 | 0.483386 |
| AIM1     | 0.150709 | 0.147135 | -0.03463 | 0.628161 |
| LCE6A    | 0.305937 | 0.283726 | -0.10874 | 0.237796 |
| CALML6   | 0.592921 | 0.578514 | -0.03549 | 0.235946 |
| C21orf2  | 0.401765 | 0.403497 | 0.006207 | 0.685368 |
| ATOX1    | 0.10598  | 0.110089 | 0.054885 | 0.044244 |
| ESPNP    | 0.287541 | 0.288412 | 0.00436  | 0.692227 |
| NKX6.2   | 0.048898 | 0.058989 | 0.270656 | 0.783502 |
| ANKRD22  | 0.651856 | 0.652235 | 0.000838 | 0.983281 |
| NCKAP5L  | 0.638754 | 0.634377 | -0.00992 | 0.634782 |
| PCDHB9   | 0.559431 | 0.575516 | 0.040894 | 0.337401 |
| TBC1D25  | 0.163809 | 0.174684 | 0.092733 | 0.163098 |
| TIFAB    | 0.565927 | 0.535872 | -0.07873 | 0.052147 |
| COPS3    | 0.085814 | 0.087352 | 0.025631 | 0.235946 |
| MVD      | 0.70404  | 0.698345 | -0.01172 | 0.303399 |
| ATP1A2   | 0.439296 | 0.437435 | -0.00613 | 0.959146 |
| BRD7     | 0.327017 | 0.328537 | 0.006689 | 0.648122 |
| PROKR1   | 0.736731 | 0.72919  | -0.01484 | 0.128975 |
| MIR760   | 0.045232 | 0.046447 | 0.038255 | 0.187518 |
| ACSL4    | 0.150693 | 0.177057 | 0.232605 | 0.354074 |
| FEZF2    | 0.092099 | 0.088271 | -0.06126 | 0.245278 |
| GALNTL2  | 0.227441 | 0.214597 | -0.08386 | 0.087871 |
| CDC5L    | 0.078484 | 0.081492 | 0.054262 | 0.0341   |
| LOC28410 | 0.352976 | 0.344631 | -0.03452 | 0.697388 |
| PRPF31   | 0.162757 | 0.173128 | 0.089121 | 0.092738 |

|           |          |          |          |          |
|-----------|----------|----------|----------|----------|
| BCL2L1    | 0.14612  | 0.153405 | 0.070193 | 0.06152  |
| GRM2      | 0.660926 | 0.649458 | -0.02525 | 0.008222 |
| SLC25A24  | 0.195562 | 0.199393 | 0.027991 | 0.874194 |
| FZD9      | 0.261101 | 0.28073  | 0.104575 | 0.149501 |
| ZNF358    | 0.582701 | 0.600342 | 0.04303  | 0.101168 |
| KIAA1984  | 0.32     | 0.315986 | -0.01821 | 0.287285 |
| NRIP3     | 0.233566 | 0.225954 | -0.0478  | 0.1374   |
| TARBP2    | 0.146891 | 0.151412 | 0.04374  | 0.164504 |
| WHSC1     | 0.6581   | 0.652794 | -0.01168 | 0.212012 |
| PSRC1     | 0.14369  | 0.146118 | 0.024175 | 0.66326  |
| PSMA3     | 0.065544 | 0.060259 | -0.1213  | 0.555796 |
| SLC12A8   | 0.337784 | 0.324669 | -0.05713 | 0.07188  |
| NEDD9     | 0.435375 | 0.467215 | 0.10183  | 0.299046 |
| BAP1      | 0.439943 | 0.434566 | -0.01774 | 0.473275 |
| TAF6L     | 0.128492 | 0.12669  | -0.02038 | 0.692227 |
| ASPM      | 0.09766  | 0.093582 | -0.06154 | 0.796052 |
| RGL4      | 0.2022   | 0.19901  | -0.02294 | 0.46328  |
| TOP2B     | 0.125876 | 0.122885 | -0.03469 | 0.37752  |
| OR2Z1     | 0.07271  | 0.08468  | 0.219871 | 0.317842 |
| OVCA2     | 0.105391 | 0.114086 | 0.114373 | 0.010712 |
| CDCA8     | 0.130602 | 0.131331 | 0.008028 | 0.629814 |
| LOC33953  | 0.176958 | 0.174374 | -0.02123 | 0.837648 |
| ESAM      | 0.289283 | 0.288914 | -0.00184 | 0.946164 |
| GLDN      | 0.483751 | 0.502143 | 0.053834 | 0.481938 |
| COMMD1    | 0.039359 | 0.038049 | -0.04883 | 0.407111 |
| ZNF322A   | 0.116889 | 0.118073 | 0.014542 | 0.483392 |
| ZNF746    | 0.467924 | 0.463581 | -0.01345 | 0.24528  |
| SAMD9L    | 0.434283 | 0.365012 | -0.25069 | 0.011224 |
| C5orf38   | 0.098179 | 0.094353 | -0.05735 | 0.477596 |
| DKFZP434I | 0.069824 | 0.06277  | -0.15366 | 0.005835 |
| FAM83F    | 0.544579 | 0.51015  | -0.09422 | 0.095482 |
| BAIAP2L2  | 0.674946 | 0.66719  | -0.01667 | 0.435375 |
| DRGX      | 0.604477 | 0.585966 | -0.04487 | 0.648122 |
| KCNJ12    | 0.254661 | 0.237814 | -0.09874 | 0.2332   |
| LOC28479  | 0.420617 | 0.411971 | -0.02997 | 0.643108 |
| MIR453    | 0.866952 | 0.85987  | -0.01183 | 0.634775 |
| GALNT2    | 0.536632 | 0.5285   | -0.02203 | 0.156184 |
| PLXDC2    | 0.346788 | 0.350755 | 0.01641  | 0.600349 |
| SHROOM4   | 0.206363 | 0.221258 | 0.100544 | 0.138018 |
| ADAM9     | 0.260267 | 0.269045 | 0.047859 | 0.387671 |
| GNAL      | 0.309281 | 0.311354 | 0.009638 | 0.781716 |
| KRT4      | 0.530036 | 0.490523 | -0.11177 | 0.082796 |
| LRRFIP1   | 0.4604   | 0.454489 | -0.01864 | 0.258774 |
| GPR133    | 0.564627 | 0.554809 | -0.02531 | 0.163095 |
| C2orf79   | 0.231807 | 0.227517 | -0.02695 | 0.333892 |
| SLC28A2   | 0.479068 | 0.481313 | 0.006746 | 0.452    |
| RNASE6    | 0.0652   | 0.062283 | -0.06604 | 0.189102 |
| CDV3      | 0.109223 | 0.107491 | -0.02306 | 0.740918 |
| ANKZF1    | 0.092602 | 0.090951 | -0.02596 | 0.518941 |
| ORMDL1    | 0.206332 | 0.206375 | 0.0003   | 0.517435 |
| WTIP      | 0.371603 | 0.389    | 0.066007 | 0.14051  |
| FOLH1B    | 0.489302 | 0.554384 | 0.180161 | 0.00711  |
| GJB5      | 0.545862 | 0.534946 | -0.02914 | 0.185983 |
| CPS1      | 0.516106 | 0.553615 | 0.101215 | 0.047797 |
| EFNB1     | 0.281828 | 0.285227 | 0.017296 | 0.923944 |
| JRKL      | 0.064488 | 0.063798 | -0.01551 | 0.661569 |

|           |          |          |          |          |
|-----------|----------|----------|----------|----------|
| ARHGAP25  | 0.176561 | 0.191642 | 0.118242 | 0.000669 |
| OSTalpha  | 0.596307 | 0.606991 | 0.025619 | 0.177607 |
| EBPL      | 0.168522 | 0.169722 | 0.010234 | 0.544918 |
| GPX7      | 0.246933 | 0.247445 | 0.002987 | 0.863198 |
| TNRC4     | 0.15535  | 0.152472 | -0.02698 | 0.279967 |
| ODF3L2    | 0.441095 | 0.412191 | -0.09778 | 0.027616 |
| DNAH3     | 0.355221 | 0.343423 | -0.04873 | 0.388952 |
| PLDN      | 0.128025 | 0.1302   | 0.024299 | 0.445026 |
| CENPK     | 0.055881 | 0.052629 | -0.08649 | 0.52803  |
| SH2B3     | 0.449549 | 0.447379 | -0.00698 | 0.890733 |
| NSUN5     | 0.354165 | 0.346824 | -0.03022 | 0.237795 |
| WDR81     | 0.487053 | 0.480148 | -0.0206  | 0.086151 |
| C2orf78   | 0.455201 | 0.491752 | 0.111427 | 0.079549 |
| SFTA1P    | 0.564476 | 0.572858 | 0.021267 | 0.505452 |
| MPST      | 0.527139 | 0.521154 | -0.01648 | 0.202785 |
| CLMN      | 0.508217 | 0.496031 | -0.03501 | 0.158235 |
| BTN3A3    | 0.289207 | 0.269839 | -0.10001 | 0.121525 |
| TP53I3    | 0.161634 | 0.154624 | -0.06396 | 0.325803 |
| SPTLC3    | 0.58085  | 0.565636 | -0.03829 | 0.529561 |
| DCC       | 0.231218 | 0.224221 | -0.04433 | 0.18367  |
| LCN1      | 0.505356 | 0.513956 | 0.024346 | 0.526516 |
| TNRC6A    | 0.308908 | 0.309726 | 0.003818 | 0.796055 |
| CMKLR1    | 0.529135 | 0.486936 | -0.1199  | 0.094561 |
| SLC6A17   | 0.48016  | 0.476332 | -0.01155 | 0.585853 |
| AMMECR1   | 0.254854 | 0.250554 | -0.02455 | 0.346863 |
| BAZ2B     | 0.274216 | 0.283696 | 0.049032 | 0.20114  |
| TXN       | 0.16107  | 0.158305 | -0.02498 | 0.693947 |
| LSM1      | 0.114981 | 0.116884 | 0.023682 | 0.25293  |
| FAM86C    | 0.194129 | 0.187592 | -0.04942 | 0.091389 |
| TTC9C     | 0.054291 | 0.051893 | -0.06516 | 0.133131 |
| OSBPL3    | 0.493064 | 0.508219 | 0.043674 | 0.035503 |
| ABCD4     | 0.190378 | 0.186279 | -0.0314  | 0.616643 |
| HBA2      | 0.064603 | 0.068971 | 0.094385 | 0.10312  |
| LY6G5B    | 0.702005 | 0.717597 | 0.031692 | 0.158921 |
| BTBD11    | 0.401155 | 0.39179  | -0.03408 | 0.06382  |
| RICS      | 0.517881 | 0.539193 | 0.058181 | 0.01264  |
| PSD2      | 0.369267 | 0.359787 | -0.03752 | 0.274815 |
| MFSD11    | 0.546373 | 0.568677 | 0.057725 | 0.060557 |
| MIR223    | 0.232261 | 0.214922 | -0.11193 | 0.060239 |
| MTMR12    | 0.244134 | 0.248062 | 0.023028 | 0.226872 |
| UHMK1     | 0.189561 | 0.193336 | 0.028452 | 0.376262 |
| RCOR3     | 0.093092 | 0.093825 | 0.011317 | 0.568359 |
| ZNF226    | 0.104337 | 0.102773 | -0.02179 | 0.812269 |
| KIF26A    | 0.675239 | 0.652808 | -0.04874 | 0.017548 |
| PTH1R     | 0.321158 | 0.301898 | -0.08922 | 0.003608 |
| A4GNT     | 0.366469 | 0.350748 | -0.06325 | 0.095021 |
| C22orf31  | 0.569645 | 0.567566 | -0.00528 | 0.742677 |
| JAM3      | 0.404293 | 0.407936 | 0.012943 | 0.951726 |
| COPB2     | 0.127685 | 0.127103 | -0.0066  | 0.881538 |
| LOC100271 | 0.151696 | 0.150223 | -0.01408 | 0.823123 |
| PLA2G12A  | 0.159711 | 0.16084  | 0.010161 | 0.459032 |
| NPFFR1    | 0.305255 | 0.30786  | 0.01226  | 0.688795 |
| SLC7A9    | 0.751726 | 0.747311 | -0.0085  | 0.649788 |
| SCUBE2    | 0.275823 | 0.276979 | 0.006035 | 0.746201 |
| SNORD58   | 0.166166 | 0.154221 | -0.10763 | 0.045739 |
| ZNF705A   | 0.369225 | 0.35227  | -0.06782 | 0.191468 |

|           |          |          |          |          |
|-----------|----------|----------|----------|----------|
| OR2B11    | 0.466081 | 0.451378 | -0.04625 | 0.656515 |
| ALAS2     | 0.250148 | 0.242978 | -0.04196 | 0.593888 |
| NKX6.3    | 0.475881 | 0.465268 | -0.03254 | 0.213727 |
| C3orf55   | 0.182624 | 0.200274 | 0.133103 | 0.381307 |
| PCNAP1    | 0.289606 | 0.291779 | 0.010786 | 0.589062 |
| PRAMEF13  | 0.528568 | 0.508996 | -0.05444 | 0.605217 |
| ZNF37B    | 0.1119   | 0.105253 | -0.08835 | 0.051307 |
| HTR2A     | 0.432002 | 0.433702 | 0.005667 | 0.76745  |
| CXorf38   | 0.118394 | 0.121871 | 0.041767 | 0.103117 |
| CSF3R     | 0.452147 | 0.431026 | -0.06902 | 0.004669 |
| IFNG      | 0.391244 | 0.417748 | 0.094563 | 0.254869 |
| IFFO2     | 0.392332 | 0.37363  | -0.07046 | 0.141137 |
| RFWD2     | 0.196704 | 0.197475 | 0.005646 | 0.644776 |
| PSMA2     | 0.507223 | 0.505577 | -0.00469 | 0.589061 |
| OGFR      | 0.405829 | 0.399087 | -0.02417 | 0.32466  |
| KIAA0586  | 0.213693 | 0.208904 | -0.0327  | 0.399288 |
| KIAA0556  | 0.538313 | 0.535068 | -0.00872 | 0.324659 |
| PFKFB4    | 0.299359 | 0.290668 | -0.0425  | 0.113343 |
| SFRP4     | 0.16869  | 0.156801 | -0.10544 | 0.004737 |
| SAT1      | 0.211558 | 0.23072  | 0.125086 | 0.278933 |
| LMOD1     | 0.455952 | 0.423355 | -0.10702 | 0.000474 |
| LIFR      | 0.324261 | 0.321879 | -0.01064 | 0.636446 |
| HCG26     | 0.063568 | 0.058867 | -0.11085 | 0.241513 |
| PRRG3     | 0.59334  | 0.618331 | 0.059522 | 0.60035  |
| MORC2     | 0.324993 | 0.327383 | 0.010574 | 0.445031 |
| TAF10     | 0.135213 | 0.13708  | 0.019784 | 0.368771 |
| LOC38776  | 0.047537 | 0.047067 | -0.01433 | 0.520432 |
| KIAA1586  | 0.051436 | 0.047935 | -0.1017  | 0.407141 |
| RPS12     | 0.180921 | 0.170046 | -0.08943 | 0.038455 |
| ACIN1     | 0.327227 | 0.326521 | -0.00312 | 0.935048 |
| GFRA1     | 0.405458 | 0.396052 | -0.03387 | 0.212016 |
| LOC72860  | 0.790211 | 0.776868 | -0.02457 | 0.173152 |
| POLR3GL   | 0.414487 | 0.411894 | -0.00905 | 0.765673 |
| C1orf223  | 0.555925 | 0.563305 | 0.019028 | 0.206943 |
| SGCA      | 0.329909 | 0.318669 | -0.05001 | 0.0353   |
| TM9SF4    | 0.245538 | 0.242086 | -0.02042 | 0.328098 |
| GLIPR1L2  | 0.120633 | 0.106187 | -0.18402 | 0.653151 |
| C14orf132 | 0.258334 | 0.26505  | 0.037027 | 0.115481 |
| EHD1      | 0.504465 | 0.505219 | 0.002156 | 0.656514 |
| C10orf32  | 0.196805 | 0.197698 | 0.006536 | 0.865029 |
| CXorf1    | 0.323086 | 0.317372 | -0.02574 | 0.73916  |
| HSD17B14  | 0.3788   | 0.368426 | -0.04006 | 0.076405 |
| LDB2      | 0.526406 | 0.525722 | -0.00188 | 0.787084 |
| MIR302D   | 0.718305 | 0.792152 | 0.14118  | 0.002251 |
| GAGE12J   | 0.1672   | 0.184946 | 0.14553  | 0.074871 |
| C11orf51  | 0.057104 | 0.058027 | 0.023144 | 0.258769 |
| TEK       | 0.318638 | 0.390467 | 0.293283 | 0.018339 |
| C9orf4    | 0.420735 | 0.427176 | 0.021918 | 0.206944 |
| SULT1B1   | 0.320856 | 0.365692 | 0.188699 | 0.077181 |
| TSPAN12   | 0.348162 | 0.336976 | -0.04712 | 0.447811 |
| HMGB1     | 0.186564 | 0.184765 | -0.01398 | 0.492154 |
| MIR1286   | 0.473204 | 0.485887 | 0.038159 | 0.397988 |
| ULK3      | 0.289812 | 0.286346 | -0.01736 | 0.396686 |
| PRIMA1    | 0.349393 | 0.346343 | -0.01265 | 0.619926 |
| FAM83B    | 0.239166 | 0.26045  | 0.122997 | 0.141768 |
| SPANXN1   | 0.227982 | 0.23071  | 0.017161 | 0.718169 |

|          |          |          |           |          |
|----------|----------|----------|-----------|----------|
| SNAPC4   | 0.656502 | 0.656654 | 0.000332  | 0.985138 |
| PEX11A   | 0.120087 | 0.122243 | 0.025668  | 0.865028 |
| TMEM48   | 0.303268 | 0.300633 | -0.01259  | 0.883375 |
| ORC6L    | 0.090186 | 0.090993 | 0.012856  | 0.411112 |
| JMJD4    | 0.11314  | 0.118101 | 0.061914  | 0.060876 |
| RAB6B    | 0.33184  | 0.335595 | 0.016236  | 0.535677 |
| MLKL     | 0.259177 | 0.243524 | -0.08987  | 0.066191 |
| PSMC1    | 0.282298 | 0.279352 | -0.01514  | 0.33273  |
| PIGN     | 0.093475 | 0.08698  | -0.10389  | 0.031807 |
| FBP1     | 0.524363 | 0.51118  | -0.03673  | 0.262723 |
| PLP2     | 0.176502 | 0.189508 | 0.102568  | 0.36383  |
| MYO18B   | 0.586802 | 0.578094 | -0.02157  | 0.215443 |
| KIF2C    | 0.192282 | 0.192553 | 0.002034  | 0.84311  |
| DULLARD  | 0.411041 | 0.421664 | 0.036811  | 0.036954 |
| SNRPB2   | 0.097999 | 0.101793 | 0.05479   | 0.194652 |
| HSD17B2  | 0.522982 | 0.489863 | -0.09438  | 0.045739 |
| KLK3     | 0.436849 | 0.448094 | 0.036666  | 0.746202 |
| HMHB1    | 0.405715 | 0.400352 | -0.0192   | 0.79965  |
| SNX30    | 0.270191 | 0.264705 | -0.02959  | 0.185212 |
| METTL5   | 0.121223 | 0.121394 | 0.002039  | 0.648118 |
| PROX2    | 0.332867 | 0.326431 | -0.02817  | 0.231377 |
| FOXE1    | 0.08144  | 0.076222 | -0.09553  | 0.344479 |
| RNF182   | 0.284316 | 0.285564 | 0.00632   | 0.899941 |
| DEFB4    | 0.664993 | 0.663497 | -0.00325  | 0.709481 |
| C22orf32 | 0.208955 | 0.206843 | -0.01466  | 0.156187 |
| SSC5D    | 0.338184 | 0.335467 | -0.01164  | 0.855883 |
| PPFIBP2  | 0.37993  | 0.374142 | -0.02215  | 0.326951 |
| RARRES1  | 0.245935 | 0.241061 | -0.02888  | 0.466125 |
| C19orf12 | 0.364403 | 0.362029 | -0.00943  | 0.898098 |
| C9orf123 | 0.328558 | 0.335035 | 0.028164  | 0.381306 |
| HTATSF1  | 0.157552 | 0.178485 | 0.179981  | 0.055327 |
| SLC6A8   | 0.369319 | 0.377301 | 0.030851  | 0.549567 |
| PRMT8    | 0.224187 | 0.214478 | -0.06387  | 0.158924 |
| MT1G     | 0.203503 | 0.201083 | -0.01726  | 0.920247 |
| CACNB3   | 0.30715  | 0.329423 | 0.100997  | 0.006309 |
| CHN2     | 0.441238 | 0.436549 | -0.01541  | 0.562061 |
| LPPR5    | 0.240878 | 0.226032 | -0.09177  | 0.000179 |
| TPRX1    | 0.484961 | 0.502735 | 0.05193   | 0.428555 |
| CHRNA8   | 0.491693 | 0.48577  | -0.01749  | 0.644777 |
| ATG12    | 0.118011 | 0.117308 | -0.00862  | 0.940605 |
| ZNF487   | 0.18921  | 0.192182 | 0.02248   | 0.431275 |
| RET      | 0.338616 | 0.349342 | 0.044987  | 0.173889 |
| CCDC127  | 0.519258 | 0.516633 | -0.00731  | 0.412436 |
| FADS3    | 0.246691 | 0.241801 | -0.02888  | 0.405832 |
| VAMP2    | 0.132937 | 0.136214 | 0.035129  | 0.183672 |
| PHLPP1   | 0.232839 | 0.22997  | -0.01789  | 0.380041 |
| ING1     | 0.126693 | 0.125996 | -0.00796  | 0.938752 |
| ANO2     | 0.232422 | 0.228852 | -0.02233  | 0.774574 |
| ST7OT3   | 0.809566 | 0.81253  | 0.005272  | 0.737399 |
| PIBF1    | 0.358887 | 0.369772 | 0.043107  | 0.543373 |
| NODAL    | 0.341465 | 0.34146  | -1.89E-05 | 0.922096 |
| LOC64493 | 0.739335 | 0.732576 | -0.01325  | 0.194649 |
| BTG1     | 0.085014 | 0.079568 | -0.09551  | 0.213724 |
| CLDN22   | 0.623818 | 0.636675 | 0.029433  | 0.616642 |
| LOC64640 | 0.418562 | 0.425479 | 0.023648  | 0.861368 |
| UBAP1    | 0.188585 | 0.183241 | -0.04147  | 0.278932 |

|          |          |          |          |          |
|----------|----------|----------|----------|----------|
| VWA3B    | 0.345989 | 0.337166 | -0.03726 | 0.223312 |
| CLINT1   | 0.209027 | 0.208847 | -0.00125 | 0.994427 |
| F13B     | 0.199071 | 0.237999 | 0.257667 | 0.000961 |
| TRIP4    | 0.372824 | 0.385915 | 0.04979  | 0.156867 |
| C7orf52  | 0.230964 | 0.260719 | 0.174826 | 0.352865 |
| UBFD1    | 0.182717 | 0.183881 | 0.009157 | 0.85771  |
| MAP7     | 0.357516 | 0.357045 | -0.0019  | 0.526514 |
| EGFL6    | 0.218218 | 0.216484 | -0.01151 | 0.927644 |
| C10orf27 | 0.744935 | 0.725997 | -0.03715 | 0.010152 |
| PDXP     | 0.153796 | 0.150589 | -0.0304  | 0.204441 |
| HTN1     | 0.29578  | 0.334518 | 0.177562 | 0.074872 |
| TAS2R3   | 0.73544  | 0.744516 | 0.017695 | 0.285179 |
| C5AR1    | 0.171149 | 0.179632 | 0.069792 | 0.434006 |
| MAGEA8   | 0.426213 | 0.423036 | -0.01079 | 0.850404 |
| CSAG1    | 0.558186 | 0.541617 | -0.04347 | 0.173155 |
| RUFY1    | 0.335669 | 0.337255 | 0.006802 | 0.742678 |
| SLC45A2  | 0.619396 | 0.627944 | 0.019774 | 0.4151   |
| SLC30A1  | 0.174655 | 0.170916 | -0.03122 | 0.348059 |
| NSD1     | 0.554558 | 0.556261 | 0.004423 | 0.876029 |
| PCDH17   | 0.291927 | 0.284882 | -0.03524 | 0.397987 |
| LTBP2    | 0.457099 | 0.438304 | -0.06058 | 0.033905 |
| YARS2    | 0.05292  | 0.051895 | -0.02823 | 0.769222 |
| SULT1C4  | 0.116478 | 0.101045 | -0.20506 | 0.128979 |
| SLC45A4  | 0.717541 | 0.705129 | -0.02518 | 0.110715 |
| PTX3     | 0.233811 | 0.197997 | -0.23986 | 0.054153 |
| MBL1P    | 0.272721 | 0.24889  | -0.13192 | 0.034101 |
| SEC31B   | 0.332625 | 0.3452   | 0.053533 | 0.382574 |
| PGGT1B   | 0.258584 | 0.254714 | -0.02176 | 0.471841 |
| TRPC5    | 0.494731 | 0.508319 | 0.03909  | 0.518943 |
| CAPN12   | 0.459663 | 0.443978 | -0.05009 | 0.04046  |
| CLTCL1   | 0.172373 | 0.171306 | -0.00896 | 0.712953 |
| TOLLIP   | 0.729261 | 0.72618  | -0.00611 | 0.499512 |
| ADAMTS6  | 0.192384 | 0.194843 | 0.018324 | 0.544918 |
| DLG3     | 0.349247 | 0.361277 | 0.048858 | 0.317844 |
| CC2D1B   | 0.185019 | 0.187228 | 0.017124 | 0.481938 |
| ARL2BP   | 0.102595 | 0.104014 | 0.019819 | 0.446419 |
| BLCAP    | 0.405078 | 0.413843 | 0.030883 | 0.324659 |
| ACAD11   | 0.212447 | 0.213075 | 0.004254 | 0.582655 |
| C9orf9   | 0.491959 | 0.502502 | 0.030591 | 0.446419 |
| RDH16    | 0.457257 | 0.495743 | 0.116588 | 0.038893 |
| LTBP3    | 0.482709 | 0.490037 | 0.021736 | 0.709484 |
| HELZ     | 0.232225 | 0.235957 | 0.022998 | 0.450599 |
| PF4      | 0.330842 | 0.350188 | 0.081989 | 0.407149 |
| RTN4IP1  | 0.286988 | 0.288591 | 0.008036 | 0.60035  |
| UBTD1    | 0.356839 | 0.347045 | -0.04015 | 0.046502 |
| PATL1    | 0.188368 | 0.197458 | 0.067993 | 0.109164 |
| AQP10    | 0.448917 | 0.431187 | -0.05814 | 0.058666 |
| FBF1     | 0.432489 | 0.42549  | -0.02354 | 0.175369 |
| ZNF839   | 0.311867 | 0.316529 | 0.021407 | 0.330411 |
| MCPH1    | 0.518844 | 0.518204 | -0.00178 | 0.959145 |
| CABP4    | 0.651264 | 0.630556 | -0.04662 | 0.109164 |
| PDZD11   | 0.281534 | 0.2928   | 0.056605 | 0.742678 |
| RBM19    | 0.451018 | 0.445018 | -0.01932 | 0.179109 |
| ZNF275   | 0.377741 | 0.383457 | 0.021667 | 0.492154 |
| HLA.DMB  | 0.321533 | 0.312003 | -0.04341 | 0.495093 |
| TSEN34   | 0.055007 | 0.057932 | 0.074727 | 0.182896 |

|           |          |          |          |          |
|-----------|----------|----------|----------|----------|
| MIR944    | 0.507944 | 0.476415 | -0.09245 | 0.419111 |
| ITGB1BP1  | 0.325151 | 0.33153  | 0.02803  | 0.370015 |
| SLC18A3   | 0.140735 | 0.133091 | -0.08057 | 0.1495   |
| TBP       | 0.380622 | 0.389275 | 0.03243  | 0.643108 |
| ZNF485    | 0.229951 | 0.234151 | 0.026112 | 0.310011 |
| KRTAP25.1 | 0.368759 | 0.388553 | 0.075434 | 0.670033 |
| CPT1B     | 0.613712 | 0.641536 | 0.06397  | 0.043755 |
| CDK6      | 0.312362 | 0.319574 | 0.032931 | 0.136783 |
| RFC3      | 0.220555 | 0.218884 | -0.01097 | 0.796054 |
| SNORA47   | 0.413985 | 0.411622 | -0.00826 | 0.810463 |
| ZBTB44    | 0.1991   | 0.200315 | 0.008775 | 0.582655 |
| F8        | 0.359312 | 0.375677 | 0.064256 | 0.036744 |
| MAGI3     | 0.178434 | 0.18077  | 0.018761 | 0.850404 |
| KCNN1     | 0.372153 | 0.357391 | -0.0584  | 0.463281 |
| GP6       | 0.408007 | 0.445956 | 0.128309 | 0.098768 |
| CWC15     | 0.218784 | 0.216887 | -0.01256 | 0.824935 |
| SLAMF6    | 0.183288 | 0.160654 | -0.19015 | 0.111239 |
| PRKCDBP   | 0.452387 | 0.55578  | 0.296955 | 0.024055 |
| C16orf63  | 0.297189 | 0.292761 | -0.02166 | 0.48339  |
| CHD5      | 0.505796 | 0.501111 | -0.01343 | 0.649796 |
| C8orf74   | 0.712415 | 0.699347 | -0.02671 | 0.144949 |
| PFDN1     | 0.310902 | 0.311623 | 0.003344 | 0.606844 |
| C12orf68  | 0.149674 | 0.147192 | -0.02412 | 0.477596 |
| TBX6      | 0.334332 | 0.326869 | -0.03257 | 0.251965 |
| SLC25A5   | 0.164013 | 0.17153  | 0.064644 | 0.670032 |
| DIXDC1    | 0.265291 | 0.256851 | -0.04664 | 0.143034 |
| ANKRD49   | 0.322681 | 0.324898 | 0.009878 | 0.949872 |
| KAT2A     | 0.636396 | 0.630144 | -0.01424 | 0.197875 |
| NUPL1     | 0.161154 | 0.165282 | 0.036487 | 0.619926 |
| QSOX2     | 0.571768 | 0.563331 | -0.02145 | 0.123779 |
| SETD7     | 0.339031 | 0.332269 | -0.02907 | 0.264712 |
| TTC18     | 0.092253 | 0.089123 | -0.0498  | 0.618282 |
| SIRT3     | 0.255523 | 0.26044  | 0.0275   | 0.285181 |
| ANKRD58   | 0.24929  | 0.258805 | 0.054035 | 0.716429 |
| NDUFS2    | 0.355615 | 0.367504 | 0.047442 | 0.245282 |
| ALS2      | 0.274963 | 0.277253 | 0.011968 | 0.589059 |
| SLC39A8   | 0.1537   | 0.158677 | 0.045981 | 0.257795 |
| UQCRB     | 0.101887 | 0.104272 | 0.033377 | 0.480489 |
| KCNK7     | 0.580357 | 0.585712 | 0.01325  | 0.315593 |
| RPSA      | 0.155871 | 0.145413 | -0.1002  | 0.032746 |
| MIR345    | 0.041863 | 0.041341 | -0.01811 | 0.841284 |
| ELOVL1    | 0.177031 | 0.181529 | 0.0362   | 0.262723 |
| FAM155A   | 0.335089 | 0.336687 | 0.006864 | 0.855883 |
| SLC16A13  | 0.143009 | 0.13786  | -0.05289 | 0.452    |
| ZNF77     | 0.16617  | 0.166946 | 0.006722 | 0.520451 |
| LOC33952  | 0.420329 | 0.410118 | -0.03548 | 0.501    |
| MIP       | 0.428537 | 0.414872 | -0.04675 | 0.260745 |
| SLC7A2    | 0.349141 | 0.368701 | 0.078641 | 0.040233 |
| SERTAD2   | 0.337657 | 0.320532 | -0.07509 | 0.055327 |
| CCDC41    | 0.153355 | 0.159119 | 0.053235 | 0.088737 |
| ERCC4     | 0.277502 | 0.27103  | -0.03405 | 0.170961 |
| DAG1      | 0.519517 | 0.515175 | -0.01211 | 0.456211 |
| SPRR2B    | 0.212136 | 0.206769 | -0.03697 | 0.340931 |
| DMRT3     | 0.128012 | 0.131163 | 0.035084 | 0.377516 |
| IL1F6     | 0.304983 | 0.317351 | 0.057354 | 0.534145 |
| ADCY8     | 0.296877 | 0.281474 | -0.07687 | 0.020263 |

|          |          |          |          |          |
|----------|----------|----------|----------|----------|
| NME3     | 0.075548 | 0.079019 | 0.064819 | 1        |
| PEBP4    | 0.467039 | 0.424973 | -0.13617 | 0.014965 |
| NCRNA00: | 0.453792 | 0.429604 | -0.07902 | 0.828541 |
| COX8C    | 0.693954 | 0.699419 | 0.011318 | 0.297959 |
| DENR     | 0.123949 | 0.12529  | 0.01553  | 0.540284 |
| ZNF582   | 0.112953 | 0.114513 | 0.01979  | 0.639773 |
| FBXL17   | 0.394433 | 0.401386 | 0.025211 | 0.236869 |
| ENTPD3   | 0.435536 | 0.449832 | 0.046593 | 0.821312 |
| CAMKK1   | 0.39186  | 0.383103 | -0.03261 | 0.097349 |
| KIAA1279 | 0.106042 | 0.104417 | -0.02227 | 0.70775  |
| HDAC9    | 0.4004   | 0.405081 | 0.016768 | 0.405832 |
| GALR3    | 0.333373 | 0.359005 | 0.10687  | 0.158236 |
| DBNL     | 0.287479 | 0.287271 | -0.00104 | 0.890732 |
| STK3     | 0.189598 | 0.201948 | 0.091043 | 0.226872 |
| PRR23B   | 0.484931 | 0.521958 | 0.106155 | 0.061198 |
| OAS1     | 0.143187 | 0.139149 | -0.04127 | 0.656514 |
| B3GNT7   | 0.465727 | 0.464346 | -0.00428 | 0.668337 |
| FASTKD3  | 0.313389 | 0.323784 | 0.047074 | 0.524997 |
| MAPKAPK: | 0.273053 | 0.265571 | -0.04008 | 0.177606 |
| PLK5P    | 0.182124 | 0.178953 | -0.02533 | 0.626511 |
| LHFPL4   | 0.160395 | 0.154248 | -0.05637 | 0.318974 |
| HEG1     | 0.535217 | 0.533516 | -0.00459 | 0.582654 |
| TUSC2    | 0.156024 | 0.153815 | -0.02058 | 0.366295 |
| TPK1     | 0.234511 | 0.236604 | 0.012819 | 0.63811  |
| HCLS1    | 0.589591 | 0.595339 | 0.013995 | 0.521964 |
| TGM3     | 0.74099  | 0.712918 | -0.05572 | 0.052428 |
| ANKAR    | 0.251793 | 0.255069 | 0.018645 | 0.552679 |
| NDUFB9   | 0.860738 | 0.862273 | 0.002571 | 0.940604 |
| TRIM75   | 0.539303 | 0.596669 | 0.145834 | 0.154831 |
| GRM5     | 0.405382 | 0.423486 | 0.063032 | 0.062171 |
| TBC1D3C  | 0.459766 | 0.462959 | 0.009986 | 0.916551 |
| OR1F1    | 0.169167 | 0.160579 | -0.07517 | 0.071513 |
| RBM12    | 0.099621 | 0.100963 | 0.019297 | 0.392805 |
| TIGD1    | 0.052796 | 0.05383  | 0.027964 | 0.299034 |
| CADM2    | 0.287046 | 0.295058 | 0.03972  | 0.226872 |
| WFDC6    | 0.19365  | 0.185041 | -0.0656  | 0.366297 |
| NIP7     | 0.143222 | 0.144558 | 0.013399 | 0.571524 |
| C4orf17  | 0.675251 | 0.693177 | 0.0378   | 0.584253 |
| USP46    | 0.342768 | 0.346567 | 0.015902 | 0.557362 |
| ADAMTSL: | 0.250889 | 0.26104  | 0.057221 | 0.313353 |
| NCEH1    | 0.186934 | 0.211032 | 0.17493  | 0.003105 |
| HIST1H4K | 0.081703 | 0.071997 | -0.18245 | 0.266713 |
| PILRB    | 0.214387 | 0.21214  | -0.0152  | 0.76745  |
| PUS7L    | 0.163267 | 0.165057 | 0.015728 | 0.792464 |
| KLF11    | 0.489454 | 0.509118 | 0.056828 | 0.170962 |
| MIR2110  | 0.04945  | 0.048837 | -0.01798 | 0.931343 |
| FAM173A  | 0.197872 | 0.189172 | -0.06488 | 0.138017 |
| FAM183B  | 0.552034 | 0.570005 | 0.046217 | 0.540287 |
| GLG1     | 0.091789 | 0.092755 | 0.015107 | 0.495091 |
| DEPDC6   | 0.200204 | 0.204852 | 0.033107 | 0.249082 |
| C16orf80 | 0.098067 | 0.097707 | -0.0053  | 0.852229 |
| MPL      | 0.240636 | 0.233595 | -0.04285 | 0.07449  |
| MYOF     | 0.390641 | 0.401381 | 0.039126 | 0.683659 |
| PLXNB2   | 0.679908 | 0.670456 | -0.0202  | 0.232282 |
| CD79A    | 0.416134 | 0.380001 | -0.13104 | 0.046758 |
| ZNF613   | 0.120045 | 0.121755 | 0.020408 | 0.243392 |

|          |          |          |          |          |
|----------|----------|----------|----------|----------|
| HNRNPCL1 | 0.437986 | 0.459981 | 0.070688 | 0.368773 |
| MLPH     | 0.302195 | 0.284693 | -0.08607 | 0.049391 |
| RPL5     | 0.312812 | 0.307665 | -0.02394 | 0.343295 |
| CSDE1    | 0.354278 | 0.356435 | 0.008758 | 0.990711 |
| KLHDC9   | 0.203552 | 0.186886 | -0.12324 | 0.985138 |
| SPINT3   | 0.203786 | 0.2036   | -0.00132 | 0.998142 |
| TTC7A    | 0.540883 | 0.545869 | 0.013238 | 0.428554 |
| CTNND1   | 0.34661  | 0.354315 | 0.031719 | 0.342111 |
| DTX1     | 0.530792 | 0.538835 | 0.021695 | 0.346863 |
| RBM15    | 0.111554 | 0.111996 | 0.005695 | 0.649796 |
| GLRA2    | 0.343683 | 0.332569 | -0.04743 | 0.354074 |
| NFYC     | 0.335547 | 0.33763  | 0.008927 | 0.492154 |
| SNORD116 | 0.782628 | 0.771339 | -0.02096 | 0.285178 |
| ARFIP1   | 0.240372 | 0.237915 | -0.01482 | 0.468977 |
| EPPK1    | 0.475429 | 0.518557 | 0.125271 | 0.079548 |
| CLDN25   | 0.509739 | 0.487116 | -0.06549 | 0.03802  |
| WNT1     | 0.088593 | 0.0844   | -0.06995 | 0.13678  |
| DCUN1D4  | 0.180923 | 0.178409 | -0.02019 | 0.624862 |
| SH3RF3   | 0.472698 | 0.510394 | 0.110693 | 0.273793 |
| OR3A3    | 0.3457   | 0.329926 | -0.06738 | 0.278933 |
| MIR526B  | 0.399671 | 0.414474 | 0.052469 | 0.890732 |
| FGFR3    | 0.534769 | 0.521575 | -0.03604 | 0.658197 |
| ATMIN    | 0.184178 | 0.181023 | -0.02493 | 0.584253 |
| ROBO1    | 0.368237 | 0.373159 | 0.019158 | 0.445029 |
| SPINK7   | 0.542441 | 0.530804 | -0.03129 | 0.721653 |
| SNRNP27  | 0.114905 | 0.116594 | 0.021045 | 0.302309 |
| SELT     | 0.326185 | 0.322318 | -0.01721 | 0.552679 |
| LDB3     | 0.560525 | 0.542927 | -0.04602 | 0.058665 |
| DKKL1    | 0.112611 | 0.108087 | -0.05914 | 0.275843 |
| MYO5C    | 0.335253 | 0.338563 | 0.014171 | 0.739159 |
| FEV      | 0.205534 | 0.204225 | -0.00922 | 0.787084 |
| BSPRY    | 0.036522 | 0.034255 | -0.09245 | 0.935042 |
| IL5RA    | 0.40716  | 0.435155 | 0.095932 | 0.17463  |
| FYCO1    | 0.378401 | 0.375681 | -0.01041 | 0.55112  |
| WDR11    | 0.17643  | 0.17097  | -0.04535 | 0.20032  |
| HMGA1    | 0.315527 | 0.298338 | -0.08081 | 0.005631 |
| ACTL6A   | 0.075362 | 0.069969 | -0.10712 | 0.17023  |
| RCE1     | 0.104078 | 0.10532  | 0.017119 | 0.63147  |
| SNORD104 | 0.0828   | 0.079314 | -0.06205 | 0.189885 |
| DDX50    | 0.126674 | 0.130699 | 0.045133 | 0.36877  |
| TESSP1   | 0.491771 | 0.510816 | 0.054817 | 0.387671 |
| MCAT     | 0.232795 | 0.228753 | -0.02527 | 0.279967 |
| ZSCAN4   | 0.133197 | 0.139169 | 0.06328  | 0.289402 |
| DIRAS3   | 0.491397 | 0.50227  | 0.031575 | 0.37752  |
| SCN4B    | 0.203442 | 0.183843 | -0.14614 | 0.026487 |
| SDHAP2   | 0.43518  | 0.427251 | -0.02653 | 0.198686 |
| IRF2BP1  | 0.192347 | 0.200123 | 0.057179 | 0.18832  |
| NCRNA001 | 0.321644 | 0.363418 | 0.176168 | 0.010784 |
| ITGB5    | 0.380072 | 0.361682 | -0.07155 | 0.111238 |
| OR8J3    | 0.362339 | 0.349365 | -0.0526  | 0.546467 |
| ANGPTL6  | 0.208448 | 0.222453 | 0.093813 | 0.025094 |
| TMOD1    | 0.266927 | 0.258739 | -0.04495 | 0.058356 |
| SNX27    | 0.229133 | 0.229448 | 0.001982 | 0.901785 |
| YPEL3    | 0.128086 | 0.140727 | 0.135788 | 0.087008 |
| ACPL2    | 0.294701 | 0.285981 | -0.04334 | 0.113876 |
| FOLR2    | 0.266604 | 0.251378 | -0.08484 | 0.043513 |

|          |          |          |          |          |
|----------|----------|----------|----------|----------|
| SLC1A3   | 0.20413  | 0.200601 | -0.02516 | 0.605217 |
| EXOSC3   | 0.104386 | 0.103815 | -0.00792 | 0.792462 |
| CNOT6L   | 0.32803  | 0.326447 | -0.00698 | 0.823123 |
| PAPOLA   | 0.13802  | 0.143852 | 0.059714 | 0.094102 |
| MIR128.2 | 0.55675  | 0.567267 | 0.026999 | 0.755033 |
| MAFF     | 0.090593 | 0.097774 | 0.110056 | 0.066533 |
| CYB5B    | 0.128131 | 0.130583 | 0.02735  | 0.554237 |
| SOCS7    | 0.140852 | 0.142022 | 0.011925 | 0.323517 |
| MEN1     | 0.240832 | 0.243469 | 0.015709 | 0.286233 |
| C2orf89  | 0.267001 | 0.25503  | -0.06618 | 0.074113 |
| LOC22269 | 0.069973 | 0.066301 | -0.07778 | 0.615001 |
| CORO1B   | 0.371782 | 0.373909 | 0.008229 | 0.769229 |
| CCDC99   | 0.097205 | 0.09935  | 0.031484 | 0.056221 |
| LRR3     | 0.249964 | 0.275198 | 0.13875  | 0.08874  |
| SFTA2    | 0.224634 | 0.235039 | 0.065324 | 0.449206 |
| CDH15    | 0.259612 | 0.260915 | 0.007227 | 0.953581 |
| RHOJ     | 0.274975 | 0.298252 | 0.117232 | 0.089616 |
| FBLN1    | 0.230213 | 0.216279 | -0.09008 | 0.008337 |
| OR51G2   | 0.248272 | 0.242989 | -0.03103 | 0.350458 |
| CLPP     | 0.248946 | 0.242048 | -0.04054 | 0.215445 |
| 14.Sep   | 0.239909 | 0.270204 | 0.171562 | 0.16879  |
| MIR128.1 | 0.881176 | 0.905448 | 0.039202 | 0.702538 |
| C1orf163 | 0.095398 | 0.095589 | 0.002885 | 0.894413 |
| DTWD1    | 0.018402 | 0.019585 | 0.089856 | 0.358824 |
| GRWD1    | 0.401482 | 0.397776 | -0.01338 | 0.718169 |
| PKLR     | 0.499997 | 0.510905 | 0.031137 | 0.138018 |
| PACRG    | 0.62507  | 0.622716 | -0.00544 | 0.412437 |
| TRMT61B  | 0.047576 | 0.047195 | -0.01161 | 0.725141 |
| SLC26A4  | 0.303809 | 0.323072 | 0.088689 | 0.338575 |
| BHLHE22  | 0.095633 | 0.091294 | -0.06698 | 0.055622 |
| LOC28400 | 0.536038 | 0.549103 | 0.034743 | 0.070783 |
| OSBPL10  | 0.428757 | 0.421055 | -0.02615 | 0.463279 |
| PRKD1    | 0.17238  | 0.173001 | 0.005183 | 0.998142 |
| LOC72866 | 0.566716 | 0.567525 | 0.002058 | 0.907318 |
| CIZ1     | 0.241767 | 0.244193 | 0.014404 | 0.911009 |
| PKD2     | 0.330149 | 0.327956 | -0.00961 | 0.523479 |
| ARMC7    | 0.310565 | 0.30946  | -0.00514 | 0.676832 |
| SFTPB    | 0.431445 | 0.430756 | -0.0023  | 0.888892 |
| ADAMTS1  | 0.304007 | 0.298868 | -0.0246  | 0.48339  |
| ZNF780B  | 0.205914 | 0.203453 | -0.01734 | 0.737403 |
| RHBDD3   | 0.819207 | 0.817158 | -0.00361 | 0.489212 |
| TMED4    | 0.060373 | 0.063396 | 0.070501 | 0.101162 |
| VAMP5    | 0.19214  | 0.187016 | -0.039   | 0.360153 |
| BTC      | 0.116833 | 0.114156 | -0.03344 | 0.760348 |
| SNORD95  | 0.011207 | 0.012252 | 0.128675 | 0.443154 |
| CBLN4    | 0.192395 | 0.18604  | -0.04846 | 0.2779   |
| ANKRD44  | 0.704    | 0.698017 | -0.01231 | 0.52803  |
| SAMM50   | 0.237097 | 0.233866 | -0.0198  | 0.454807 |
| SLIT1    | 0.4541   | 0.451075 | -0.00965 | 0.446418 |
| RHOT2    | 0.483746 | 0.482935 | -0.00242 | 0.896256 |
| SFRS14   | 0.214791 | 0.211742 | -0.02063 | 0.563634 |
| RPS23    | 0.207649 | 0.216008 | 0.056937 | 0.072618 |
| UBE2W    | 0.186295 | 0.191267 | 0.038004 | 0.2894   |
| DUOX2    | 0.258528 | 0.253203 | -0.03003 | 0.688795 |
| FLJ37453 | 0.340372 | 0.340801 | 0.001816 | 0.474715 |
| TEKT3    | 0.228696 | 0.227337 | -0.0086  | 0.774574 |

|           |          |          |          |          |
|-----------|----------|----------|----------|----------|
| ZNF300    | 0.243351 | 0.24369  | 0.002011 | 0.670033 |
| POLB      | 0.143751 | 0.143946 | 0.001962 | 0.464701 |
| TM9SF1    | 0.235564 | 0.238926 | 0.020447 | 0.258774 |
| SDC4P     | 0.414623 | 0.393481 | -0.07551 | 0.258773 |
| KCNK15    | 0.197454 | 0.206191 | 0.062466 | 0.234114 |
| SECISBP2L | 0.300225 | 0.297169 | -0.01476 | 0.503967 |
| C2orf29   | 0.249618 | 0.253003 | 0.019432 | 0.371259 |
| C14orf180 | 0.554884 | 0.543819 | -0.02906 | 0.421795 |
| OR4F15    | 0.736376 | 0.735283 | -0.00214 | 0.661565 |
| RTN2      | 0.369499 | 0.371084 | 0.006174 | 0.668336 |
| CPNE6     | 0.685619 | 0.6865   | 0.001852 | 0.885213 |
| 1.Dec     | 0.615473 | 0.613881 | -0.00374 | 0.901785 |
| ASCL1     | 0.124928 | 0.105377 | -0.24554 | 0.016789 |
| GSTA3     | 0.275038 | 0.302092 | 0.135357 | 0.013061 |
| PDZD4     | 0.425395 | 0.430979 | 0.018813 | 0.234112 |
| GNA15     | 0.322146 | 0.317224 | -0.02221 | 0.783504 |
| RASL11B   | 0.247752 | 0.258352 | 0.060445 | 0.34806  |
| GOLM1     | 0.230045 | 0.225248 | -0.0304  | 0.090057 |
| GPN3      | 0.176054 | 0.17668  | 0.005119 | 0.942457 |
| PDE1C     | 0.220763 | 0.206913 | -0.09347 | 0.312236 |
| BCL2L13   | 0.171094 | 0.165292 | -0.04977 | 0.464701 |
| CLEC12A   | 0.275775 | 0.291491 | 0.07996  | 0.317845 |
| TMEM51    | 0.343194 | 0.337109 | -0.02581 | 0.197875 |
| STAT1     | 0.315086 | 0.308449 | -0.03071 | 0.210316 |
| C7orf61   | 0.6055   | 0.611742 | 0.014797 | 0.380038 |
| SDF2      | 0.139608 | 0.136751 | -0.02982 | 0.390234 |
| ADAT3     | 0.381454 | 0.368486 | -0.0499  | 0.218917 |
| CLDN19    | 0.763528 | 0.746405 | -0.03272 | 0.005317 |
| CHURC1    | 0.132639 | 0.126488 | -0.0685  | 0.075635 |
| ZNF331    | 0.319118 | 0.337536 | 0.080952 | 0.081975 |
| GNPNAT1   | 0.19255  | 0.188791 | -0.02845 | 0.360153 |
| NR1D2     | 0.238863 | 0.239634 | 0.00465  | 0.951726 |
| PANX2     | 0.291303 | 0.291304 | 3.41E-06 | 0.80145  |
| ANK3      | 0.699743 | 0.710003 | 0.021    | 0.235942 |
| PAK6      | 0.411886 | 0.395466 | -0.05869 | 0.033709 |
| FUT5      | 0.297564 | 0.317958 | 0.095635 | 0.116563 |
| C9orf117  | 0.581684 | 0.550477 | -0.07955 | 0.00076  |
| SNORD114  | 0.918913 | 0.935023 | 0.025074 | 0.511302 |
| C19orf36  | 0.145397 | 0.1504   | 0.048811 | 0.479042 |
| FBXO10    | 0.276826 | 0.275141 | -0.00881 | 0.774574 |
| LPAR2     | 0.328055 | 0.335591 | 0.032768 | 0.21631  |
| CNBP      | 0.118978 | 0.115083 | -0.04802 | 0.257795 |
| MRC2      | 0.538275 | 0.532014 | -0.01688 | 0.08488  |
| EID2      | 0.047632 | 0.044902 | -0.08514 | 0.328083 |
| ZFAND3    | 0.475012 | 0.480201 | 0.015674 | 0.278928 |
| OR52B4    | 0.244961 | 0.251433 | 0.037621 | 0.576281 |
| DKFZP686I | 0.024145 | 0.024969 | 0.048448 | 0.300048 |
| MED25     | 0.065575 | 0.059975 | -0.1288  | 0.024494 |
| LSM3      | 0.12862  | 0.129539 | 0.010272 | 0.996284 |
| GJB2      | 0.137563 | 0.142196 | 0.047788 | 0.368769 |
| LIN7B     | 0.143663 | 0.147732 | 0.0403   | 0.236868 |
| ATP2B3    | 0.697527 | 0.703589 | 0.012484 | 0.733892 |
| C3orf66   | 0.571862 | 0.578291 | 0.016129 | 0.204441 |
| LMNB1     | 0.163956 | 0.164696 | 0.006495 | 0.678536 |
| ASAH1     | 0.168675 | 0.163824 | -0.0421  | 0.44503  |
| PREB      | 0.184809 | 0.19151  | 0.051382 | 0.053862 |

|           |          |          |          |          |
|-----------|----------|----------|----------|----------|
| GLRX2     | 0.285335 | 0.29224  | 0.034497 | 0.339749 |
| PAICS     | 0.053512 | 0.055558 | 0.054126 | 0.119294 |
| SRGAP3    | 0.420763 | 0.418379 | -0.0082  | 0.492152 |
| MRPL30    | 0.107412 | 0.110397 | 0.03955  | 0.284133 |
| EXOC3     | 0.503174 | 0.499862 | -0.00953 | 0.471841 |
| CCDC129   | 0.174156 | 0.158692 | -0.13415 | 0.247179 |
| CA4       | 0.262053 | 0.258529 | -0.01954 | 0.597115 |
| OR52D1    | 0.127333 | 0.133902 | 0.072572 | 0.646449 |
| HSH2D     | 0.412928 | 0.408558 | -0.01535 | 0.512925 |
| PIM3      | 0.113492 | 0.118214 | 0.058819 | 0.165925 |
| SLC27A2   | 0.236064 | 0.237987 | 0.011704 | 0.40059  |
| C11orf80  | 0.400456 | 0.398135 | -0.00839 | 0.634786 |
| THAP7     | 0.190541 | 0.193918 | 0.025341 | 0.931346 |
| BAD       | 0.06208  | 0.064005 | 0.044053 | 0.432632 |
| PNPLA8    | 0.13047  | 0.134387 | 0.042679 | 0.342111 |
| FAM107A   | 0.68912  | 0.683776 | -0.01123 | 0.680239 |
| C20orf72  | 0.098332 | 0.099822 | 0.021694 | 0.34093  |
| PRKRIR    | 0.166185 | 0.166991 | 0.00698  | 0.844932 |
| CYP46A1   | 0.133452 | 0.129474 | -0.04366 | 0.244335 |
| ATP6V0C   | 0.168774 | 0.171707 | 0.024857 | 0.351659 |
| NFKBIZ    | 0.228791 | 0.230868 | 0.013039 | 0.528035 |
| SPANXN5   | 0.36396  | 0.364855 | 0.003546 | 0.935048 |
| TLR2      | 0.243012 | 0.250818 | 0.045612 | 0.370014 |
| TMSL3     | 0.298225 | 0.301519 | 0.015847 | 0.83583  |
| FLT3      | 0.116151 | 0.12212  | 0.072298 | 0.304497 |
| VPS53     | 0.533661 | 0.529697 | -0.01076 | 0.345673 |
| RG9MTD3   | 0.012468 | 0.014524 | 0.220179 | 0.261439 |
| MRPS28    | 0.259086 | 0.257309 | -0.00993 | 0.546466 |
| OR56A5    | 0.16852  | 0.187159 | 0.151345 | 0.13075  |
| RAPGEF1   | 0.432987 | 0.431187 | -0.00601 | 0.666642 |
| TCF3      | 0.657673 | 0.652026 | -0.01244 | 0.303396 |
| KIAA1751  | 0.331784 | 0.35566  | 0.100255 | 0.093192 |
| UTP23     | 0.196889 | 0.203932 | 0.050708 | 0.06217  |
| C17orf100 | 0.062852 | 0.061678 | -0.0272  | 0.808652 |
| C4orf29   | 0.374296 | 0.376018 | 0.006624 | 0.832194 |
| CAPZB     | 0.487715 | 0.490292 | 0.007602 | 0.562063 |
| BRCA1     | 0.260192 | 0.261534 | 0.007424 | 0.814076 |
| AR        | 0.197634 | 0.203082 | 0.03923  | 0.621568 |
| FAM158A   | 0.116336 | 0.117561 | 0.015113 | 0.483388 |
| WDR70     | 0.218022 | 0.212181 | -0.03918 | 0.20196  |
| OS9       | 0.181384 | 0.173454 | -0.0645  | 0.079149 |
| FOXI1     | 0.701339 | 0.670971 | -0.06386 | 0.141135 |
| KRTAP10.1 | 0.249575 | 0.269556 | 0.111113 | 0.385118 |
| C11orf87  | 0.278526 | 0.270433 | -0.04254 | 0.345673 |
| TMEM25    | 0.097154 | 0.089925 | -0.11155 | 0.058355 |
| VTN       | 0.4165   | 0.422608 | 0.021006 | 0.656514 |
| CYTH1     | 0.442697 | 0.442711 | 4.54E-05 | 0.865029 |
| PLS3      | 0.413977 | 0.424879 | 0.037499 | 0.624862 |
| DKFZP434I | 0.43188  | 0.412468 | -0.06635 | 0.218916 |
| LOC28331  | 0.316182 | 0.28061  | -0.17219 | 0.103616 |
| TSPYL5    | 0.302363 | 0.337027 | 0.156583 | 0.071513 |
| JUB       | 0.25548  | 0.246994 | -0.04874 | 0.136171 |
| CCDC97    | 0.067692 | 0.068785 | 0.023105 | 0.623212 |
| C11orf41  | 0.643962 | 0.636325 | -0.01721 | 0.439497 |
| C4orf3    | 0.145532 | 0.152    | 0.062742 | 0.072617 |
| AMBN      | 0.465432 | 0.482905 | 0.053167 | 0.495093 |

|           |          |          |          |          |
|-----------|----------|----------|----------|----------|
| RNF34     | 0.117456 | 0.119374 | 0.023373 | 0.397987 |
| CHSY1     | 0.442583 | 0.438294 | -0.01405 | 0.50993  |
| DOLK      | 0.101836 | 0.101764 | -0.00102 | 1        |
| SLC26A3   | 0.4021   | 0.415011 | 0.045595 | 0.404517 |
| MBTPS2    | 0.147021 | 0.156914 | 0.093958 | 0.442259 |
| VDAC3     | 0.11378  | 0.116077 | 0.02883  | 0.220664 |
| GIN1      | 0.090186 | 0.093827 | 0.057102 | 0.217173 |
| ADAM8     | 0.691798 | 0.684616 | -0.01506 | 0.518939 |
| MT4       | 0.323264 | 0.296038 | -0.12693 | 0.077964 |
| INPP5F    | 0.477339 | 0.478562 | 0.003693 | 0.920247 |
| LCE1B     | 0.159728 | 0.146009 | -0.12956 | 0.199505 |
| SCEF      | 0.185363 | 0.190059 | 0.036101 | 0.452    |
| STARD9    | 0.206056 | 0.206169 | 0.000785 | 0.903629 |
| DSPP      | 0.476283 | 0.491532 | 0.045467 | 0.454804 |
| COL8A1    | 0.370236 | 0.405494 | 0.131236 | 0.07042  |
| HIST1H2BI | 0.160357 | 0.179781 | 0.164956 | 0.495093 |
| STAB1     | 0.680067 | 0.668822 | -0.02405 | 0.190676 |
| RNF167    | 0.361725 | 0.357167 | -0.0183  | 0.508436 |
| ZNF791    | 0.133314 | 0.12992  | -0.03721 | 0.511425 |
| DYX1C1    | 0.228195 | 0.231543 | 0.021018 | 0.176112 |
| VSIG4     | 0.326674 | 0.3127   | -0.06307 | 0.149501 |
| FOXN1     | 0.557386 | 0.541395 | -0.04199 | 0.173889 |
| BRD4      | 0.634615 | 0.637353 | 0.006211 | 0.709484 |
| TSPAN11   | 0.373864 | 0.363772 | -0.03948 | 0.071147 |
| LASS4     | 0.140166 | 0.143464 | 0.033554 | 0.354071 |
| TPRG1L    | 0.207178 | 0.2072   | 0.000151 | 0.841288 |
| SLC35B3   | 0.197438 | 0.202991 | 0.040018 | 0.742678 |
| FAM46C    | 0.311367 | 0.311829 | 0.002139 | 0.898099 |
| ZNF606    | 0.118406 | 0.124325 | 0.070374 | 0.552676 |
| CLEC18B   | 0.498933 | 0.500145 | 0.003501 | 0.489224 |
| NPHP4     | 0.647512 | 0.641575 | -0.01329 | 0.349254 |
| ZNRD1     | 0.108841 | 0.106263 | -0.03458 | 0.25877  |
| EXOSC10   | 0.154865 | 0.154202 | -0.00618 | 0.582651 |
| LFNG      | 0.553166 | 0.550421 | -0.00718 | 0.676831 |
| TASP1     | 0.211677 | 0.219084 | 0.049618 | 0.083623 |
| SLC18A1   | 0.284767 | 0.2814   | -0.01716 | 0.619925 |
| SMARCC1   | 0.205052 | 0.19984  | -0.03714 | 0.345673 |
| CAPZA2    | 0.129821 | 0.130892 | 0.011854 | 0.817692 |
| OR51I1    | 0.20952  | 0.215686 | 0.041847 | 0.979566 |
| GSG1L     | 0.317528 | 0.290827 | -0.12672 | 0.007569 |
| UQCRH     | 0.760603 | 0.748737 | -0.02269 | 0.205273 |
| FLJ13197  | 0.208599 | 0.203693 | -0.03434 | 0.348059 |
| ATG16L2   | 0.237794 | 0.234726 | -0.01873 | 0.688794 |
| WDR12     | 0.25884  | 0.252984 | -0.03301 | 0.23965  |
| LYPD1     | 0.23092  | 0.232652 | 0.010781 | 0.50993  |
| FAM9C     | 0.748714 | 0.728334 | -0.03981 | 0.198688 |
| CENPF     | 0.384664 | 0.384723 | 0.000222 | 0.911009 |
| UNC5B     | 0.271117 | 0.266732 | -0.02353 | 0.388952 |
| MBIP      | 0.186166 | 0.184962 | -0.00937 | 0.894414 |
| HIST1H4I  | 0.825833 | 0.878931 | 0.0899   | 0.503955 |
| PRR24     | 0.044987 | 0.044735 | -0.00809 | 0.486297 |
| KHDC1     | 0.247234 | 0.251413 | 0.024184 | 0.454805 |
| LAMB3     | 0.519341 | 0.51165  | -0.02153 | 0.305592 |
| CACNB1    | 0.303371 | 0.305965 | 0.01228  | 0.888892 |
| ZNF90     | 0.135074 | 0.139582 | 0.047364 | 0.16807  |
| NHLRC1    | 0.24088  | 0.266961 | 0.148312 | 0.043031 |

|          |          |          |          |          |
|----------|----------|----------|----------|----------|
| ZFP91    | 0.180663 | 0.182216 | 0.01235  | 0.43264  |
| C9orf156 | 0.172063 | 0.166313 | -0.04904 | 0.857711 |
| DEFB134  | 0.611793 | 0.579557 | -0.07809 | 0.447809 |
| MRGPRG   | 0.612885 | 0.581524 | -0.07578 | 0.025398 |
| LOXL3    | 0.31594  | 0.300236 | -0.07355 | 0.117106 |
| RSPH6A   | 0.434123 | 0.465098 | 0.099431 | 0.066881 |
| WSCD1    | 0.549085 | 0.537068 | -0.03193 | 0.12781  |
| NUBP2    | 0.34459  | 0.340571 | -0.01693 | 0.34093  |
| S100A6   | 0.246391 | 0.253162 | 0.03911  | 0.592276 |
| GDF6     | 0.170516 | 0.189692 | 0.153751 | 0.148189 |
| CT47A1   | 0.674446 | 0.709378 | 0.072852 | 0.367524 |
| TRADD    | 0.121749 | 0.11823  | -0.04231 | 0.584252 |
| WFDC1    | 0.374433 | 0.338108 | -0.14722 | 0.026646 |
| CD300E   | 0.44624  | 0.369219 | -0.27334 | 0.003373 |
| CCL5     | 0.359514 | 0.357422 | -0.00842 | 0.998142 |
| KHDRBS1  | 0.254507 | 0.26122  | 0.037557 | 0.162395 |
| CARD14   | 0.62565  | 0.610566 | -0.03521 | 0.00731  |
| AKR1C2   | 0.240057 | 0.250488 | 0.061362 | 0.023478 |
| TYROBP   | 0.462731 | 0.430777 | -0.10323 | 0.025705 |
| RELA     | 0.392902 | 0.398731 | 0.021248 | 0.48339  |
| KIAA1632 | 0.277175 | 0.274793 | -0.01246 | 0.576281 |
| PCDHB4   | 0.453205 | 0.477539 | 0.075454 | 0.261733 |
| MIR514.3 | 0.225451 | 0.20343  | -0.14828 | 0.105607 |
| WDR60    | 0.529069 | 0.528587 | -0.00131 | 0.899941 |
| LDLRAD2  | 0.421498 | 0.422358 | 0.002939 | 0.634786 |
| CDK18    | 0.411353 | 0.406504 | -0.01711 | 0.325804 |
| ORC3L    | 0.26493  | 0.267609 | 0.014515 | 0.565207 |
| ZFYVE28  | 0.485726 | 0.479694 | -0.01803 | 0.425841 |
| UCP2     | 0.17176  | 0.171746 | -0.00012 | 0.907318 |
| NTSR2    | 0.467723 | 0.513205 | 0.133881 | 0.01029  |
| SCN8A    | 0.385672 | 0.390492 | 0.017918 | 0.50993  |
| GRASP    | 0.416993 | 0.419935 | 0.010142 | 0.690511 |
| ATOH7    | 0.487955 | 0.510797 | 0.066003 | 0.062826 |
| GXYLT1   | 0.197508 | 0.197524 | 0.000116 | 0.852228 |
| SUCNR1   | 0.281976 | 0.290414 | 0.042537 | 0.138019 |
| PLA2G2F  | 0.345365 | 0.327067 | -0.07854 | 0.089616 |
| ADAM17   | 0.248407 | 0.252333 | 0.022625 | 0.55268  |
| KDM4B    | 0.63041  | 0.620362 | -0.02318 | 0.160305 |
| OR4N4    | 0.250901 | 0.228957 | -0.13204 | 0.264714 |
| C19orf61 | 0.123637 | 0.124413 | 0.009032 | 0.783504 |
| SGIP1    | 0.370109 | 0.381768 | 0.044744 | 0.051586 |
| TLL1     | 0.146413 | 0.159445 | 0.123019 | 0.056522 |
| ESF1     | 0.125506 | 0.129609 | 0.046416 | 0.045487 |
| HPGD     | 0.180795 | 0.185632 | 0.038091 | 0.506943 |
| RFXANK   | 0.33893  | 0.343546 | 0.019513 | 0.598731 |
| ZNF658   | 0.054278 | 0.060476 | 0.15601  | 0.068629 |
| AMT      | 0.472138 | 0.474401 | 0.006897 | 0.990711 |
| ZNF428   | 0.18191  | 0.182925 | 0.00803  | 0.468976 |
| ROBO3    | 0.22042  | 0.208578 | -0.07967 | 0.177607 |
| RXFP2    | 0.595262 | 0.611995 | 0.039993 | 0.132534 |
| EEF1DP3  | 0.291507 | 0.29114  | -0.00182 | 0.91655  |
| SLC39A5  | 0.712686 | 0.716978 | 0.008663 | 0.266709 |
| GLB1L3   | 0.389276 | 0.382692 | -0.02461 | 0.403206 |
| RTDR1    | 0.309155 | 0.313714 | 0.021119 | 0.474714 |
| NOL10    | 0.322527 | 0.325375 | 0.012683 | 0.656514 |
| TEX9     | 0.056818 | 0.054848 | -0.05091 | 0.518935 |

|          |          |          |          |          |
|----------|----------|----------|----------|----------|
| LOC14443 | 0.888915 | 0.909901 | 0.033665 | 0.066866 |
| PIK3R5   | 0.340052 | 0.335534 | -0.0193  | 0.781716 |
| TSKU     | 0.315993 | 0.301408 | -0.06817 | 0.036534 |
| CCDC45   | 0.062853 | 0.059488 | -0.07937 | 0.412433 |
| GPR119   | 0.638602 | 0.613832 | -0.05707 | 0.493621 |
| PANK2    | 0.315078 | 0.314233 | -0.00388 | 0.671729 |
| GPC6     | 0.47506  | 0.482662 | 0.022904 | 0.138635 |
| HSPB8    | 0.216001 | 0.212475 | -0.02375 | 0.264714 |
| KIAA1598 | 0.234623 | 0.225961 | -0.05427 | 0.052999 |
| C2orf61  | 0.476716 | 0.48731  | 0.031711 | 0.235948 |
| GPX2     | 0.826479 | 0.820406 | -0.01064 | 0.209457 |
| C4orf46  | 0.128768 | 0.130819 | 0.022796 | 0.737402 |
| C10orf28 | 0.219839 | 0.224242 | 0.028607 | 0.256816 |
| WDR59    | 0.222469 | 0.230132 | 0.048856 | 0.172421 |
| C6orf72  | 0.161566 | 0.164887 | 0.029357 | 0.202787 |
| EPB41L1  | 0.423675 | 0.415478 | -0.02819 | 0.251001 |
| ULBP2    | 0.075584 | 0.069518 | -0.12069 | 0.04303  |
| C9orf170 | 0.392091 | 0.379988 | -0.04523 | 0.653152 |
| TTY8     | 0.47005  | 0.443238 | -0.08473 | 0.885182 |
| OLFM3    | 0.170307 | 0.179499 | 0.075841 | 0.270745 |
| CACNA2D  | 0.530897 | 0.530436 | -0.00125 | 0.760345 |
| ANO6     | 0.229276 | 0.234348 | 0.031564 | 0.072989 |
| LGTN     | 0.361832 | 0.372419 | 0.041606 | 0.179109 |
| PDK1     | 0.130297 | 0.12811  | -0.02443 | 0.357713 |
| AVL9     | 0.376483 | 0.376795 | 0.001196 | 0.776357 |
| TRAT1    | 0.481128 | 0.497564 | 0.048462 | 0.073362 |
| ZNF30    | 0.29412  | 0.284365 | -0.04866 | 0.092287 |
| DNAJC11  | 0.266353 | 0.263945 | -0.0131  | 0.454806 |
| DDHD2    | 0.097877 | 0.098531 | 0.009615 | 0.191459 |
| ZFAT     | 0.453195 | 0.460298 | 0.022438 | 0.259756 |
| OR51E2   | 0.230757 | 0.254469 | 0.141114 | 0.183672 |
| MIR383   | 0.814591 | 0.853308 | 0.06699  | 0.363822 |
| MRPL9    | 0.916744 | 0.909474 | -0.01149 | 0.483352 |
| ANKRD55  | 0.363602 | 0.363231 | -0.00147 | 0.621569 |
| ZFP36L1  | 0.163048 | 0.147518 | -0.14441 | 0.846755 |
| HRAS     | 0.265117 | 0.270964 | 0.031474 | 0.331567 |
| APOB48R  | 0.524795 | 0.544323 | 0.052711 | 0.388952 |
| NUDT8    | 0.06555  | 0.06673  | 0.025743 | 0.597107 |
| C9orf44  | 0.051704 | 0.048888 | -0.0808  | 0.24716  |
| B3GNTL1  | 0.481742 | 0.493343 | 0.034332 | 0.101168 |
| ZNF296   | 0.365065 | 0.361844 | -0.01279 | 0.408468 |
| CASC2    | 0.216417 | 0.225778 | 0.061095 | 0.0853   |
| C6orf173 | 0.199714 | 0.200997 | 0.009239 | 0.653152 |
| LRMP     | 0.578462 | 0.585304 | 0.016963 | 0.466124 |
| RIMS2    | 0.279784 | 0.286975 | 0.036615 | 0.537211 |
| MYOZ2    | 0.540677 | 0.530051 | -0.02863 | 0.621569 |
| L3MBTL2  | 0.166299 | 0.162663 | -0.03189 | 0.532613 |
| FFAR1    | 0.418123 | 0.41031  | -0.02721 | 0.670032 |
| CCDC90B  | 0.217754 | 0.222781 | 0.032926 | 0.340931 |
| NEDD4L   | 0.458653 | 0.456386 | -0.00715 | 0.823123 |
| AADACL2  | 0.348005 | 0.384691 | 0.144593 | 0.099722 |
| LOC28317 | 0.78608  | 0.781251 | -0.00889 | 0.358926 |
| KCNIP3   | 0.312346 | 0.307312 | -0.02344 | 0.518942 |
| FBXO22OS | 0.570308 | 0.593314 | 0.057055 | 0.214584 |
| C1orf85  | 0.410759 | 0.408315 | -0.00861 | 0.781716 |
| SERPINB7 | 0.628662 | 0.611779 | -0.03927 | 0.315591 |

|           |          |          |          |          |
|-----------|----------|----------|----------|----------|
| SIK2      | 0.307187 | 0.298985 | -0.03904 | 0.212871 |
| TGM6      | 0.650061 | 0.634711 | -0.03447 | 0.076018 |
| PRKRIP1   | 0.194269 | 0.195566 | 0.009599 | 0.558926 |
| ISL1      | 0.07968  | 0.081255 | 0.028232 | 0.792461 |
| IGFBP2    | 0.340599 | 0.323733 | -0.07327 | 0.053286 |
| NGB       | 0.490547 | 0.489487 | -0.00312 | 0.859539 |
| SUB1      | 0.36596  | 0.345175 | -0.08436 | 0.00191  |
| ANP32D    | 0.408144 | 0.406917 | -0.00434 | 0.994427 |
| BLVRB     | 0.408003 | 0.402438 | -0.01981 | 0.806854 |
| SNORD11f  | 0.368284 | 0.361378 | -0.02731 | 0.760348 |
| ISLR      | 0.58807  | 0.571324 | -0.04168 | 0.264714 |
| KIAA0947  | 0.215939 | 0.215401 | -0.0036  | 0.839468 |
| PIN4      | 0.259545 | 0.255299 | -0.0238  | 0.38895  |
| KRTAP10.5 | 0.293735 | 0.286808 | -0.03443 | 0.593888 |
| ZDHHC11   | 0.545272 | 0.544374 | -0.00238 | 0.814075 |
| MAPRE2    | 0.155025 | 0.151553 | -0.03267 | 0.532613 |
| CPEB1     | 0.264326 | 0.251753 | -0.07031 | 0.272776 |
| SLC22A25  | 0.200576 | 0.20802  | 0.052573 | 0.631471 |
| GALNT7    | 0.208931 | 0.204616 | -0.03011 | 0.606845 |
| C17orf44  | 0.076643 | 0.075737 | -0.01716 | 0.548011 |
| RIN2      | 0.540999 | 0.494478 | -0.12972 | 0.034298 |
| LRRFIP2   | 0.30029  | 0.305055 | 0.022715 | 0.277899 |
| CLDN5     | 0.54991  | 0.524781 | -0.06748 | 0.360151 |
| XCL1      | 0.550038 | 0.561635 | 0.030103 | 0.355285 |
| TBC1D7    | 0.225339 | 0.22618  | 0.005376 | 0.443645 |
| USP18     | 0.243465 | 0.24007  | -0.02026 | 0.707751 |
| C16orf48  | 0.902132 | 0.894941 | -0.01155 | 0.00575  |
| MOGAT2    | 0.469772 | 0.457132 | -0.03935 | 0.045739 |
| MAP2K7    | 0.272805 | 0.265967 | -0.03662 | 0.108137 |
| CDC42BPE  | 0.674332 | 0.668692 | -0.01212 | 0.349251 |
| C14orf162 | 0.616951 | 0.586552 | -0.0729  | 0.49362  |
| RPL12     | 0.186883 | 0.160996 | -0.21511 | 0.01857  |
| BIVM      | 0.219599 | 0.219697 | 0.000647 | 0.95729  |
| C3orf51   | 0.453724 | 0.458486 | 0.015062 | 0.466122 |
| OR52N5    | 0.397141 | 0.440016 | 0.147908 | 0.293661 |
| USP38     | 0.137045 | 0.141114 | 0.042208 | 0.874194 |
| DCUN1D2   | 0.541521 | 0.531071 | -0.02812 | 0.034298 |
| FRS2      | 0.279386 | 0.282194 | 0.014425 | 0.534145 |
| BNIP3     | 0.480776 | 0.484358 | 0.010708 | 0.854055 |
| RIN3      | 0.286995 | 0.288727 | 0.008684 | 0.565208 |
| ATF3      | 0.160554 | 0.153508 | -0.06474 | 0.049932 |
| CDK4      | 0.125075 | 0.120683 | -0.05158 | 0.484845 |
| AGPAT2    | 0.366969 | 0.369941 | 0.011636 | 0.806855 |
| CREB5     | 0.459534 | 0.450471 | -0.02874 | 0.264713 |
| HMGN3     | 0.256761 | 0.261013 | 0.023694 | 0.277896 |
| C12orf56  | 0.219031 | 0.243379 | 0.152068 | 0.092287 |
| ENTPD8    | 0.31337  | 0.339565 | 0.115821 | 0.087871 |
| GABRA3    | 0.409353 | 0.435616 | 0.089711 | 0.11441  |
| CBFB      | 0.237752 | 0.241222 | 0.020902 | 0.323517 |
| KRT2      | 0.609865 | 0.545694 | -0.1604  | 0.043271 |
| OR4K15    | 0.354921 | 0.330852 | -0.10131 | 0.165926 |
| ATP8B2    | 0.186331 | 0.187615 | 0.009912 | 0.763896 |
| AZIN1     | 0.16245  | 0.165197 | 0.024188 | 0.35893  |
| GTF2H5    | 0.118621 | 0.123107 | 0.053551 | 0.207784 |
| TMED5     | 0.096026 | 0.094794 | -0.01864 | 0.881537 |
| PPIL6     | 0.313068 | 0.319823 | 0.030795 | 0.540288 |

|          |          |          |          |          |
|----------|----------|----------|----------|----------|
| OR5B2    | 0.283293 | 0.255222 | -0.15054 | 0.195455 |
| FBXL21   | 0.234532 | 0.216994 | -0.11213 | 0.133139 |
| PEX1     | 0.107387 | 0.108432 | 0.013965 | 0.419107 |
| KCNMB2   | 0.34734  | 0.393852 | 0.181305 | 0.007622 |
| OR4S2    | 0.343256 | 0.350711 | 0.030996 | 0.714691 |
| FAM63B   | 0.074839 | 0.07975  | 0.091696 | 0.086576 |
| GPR126   | 0.359288 | 0.381043 | 0.08481  | 0.191468 |
| CYP4A22  | 0.389708 | 0.386034 | -0.01366 | 0.569942 |
| PKN3     | 0.35645  | 0.354653 | -0.00729 | 0.718169 |
| GPR39    | 0.549264 | 0.539782 | -0.02512 | 0.80505  |
| IL1RN    | 0.39676  | 0.430458 | 0.117606 | 0.254869 |
| LRRC43   | 0.451332 | 0.44056  | -0.03485 | 0.166636 |
| CXCL12   | 0.314088 | 0.303495 | -0.04949 | 0.416433 |
| TCEAL1   | 0.109696 | 0.115448 | 0.073733 | 0.428555 |
| KRT40    | 0.357015 | 0.346022 | -0.04512 | 0.278933 |
| RNMT     | 0.178684 | 0.182873 | 0.033426 | 0.368773 |
| PPP1R10  | 0.61223  | 0.618781 | 0.015354 | 0.28518  |
| CDH18    | 0.205849 | 0.216801 | 0.074784 | 0.08116  |
| FGFBP1   | 0.654683 | 0.630266 | -0.05484 | 0.150158 |
| DMRTC2   | 0.577818 | 0.550751 | -0.06922 | 0.509928 |
| LOC72802 | 0.487241 | 0.481302 | -0.01769 | 0.697388 |
| SUMF1    | 0.298463 | 0.297264 | -0.00581 | 0.654832 |
| LOC64676 | 0.367168 | 0.362182 | -0.01973 | 0.233199 |
| SNAR.B1  | 0.184274 | 0.196454 | 0.09234  | 0.119853 |
| ITPKB    | 0.39007  | 0.370465 | -0.0744  | 0.002567 |
| CYP2B6   | 0.267596 | 0.266754 | -0.00455 | 0.416435 |
| SPSB1    | 0.565238 | 0.545283 | -0.05185 | 0.693945 |
| LOC28609 | 0.44252  | 0.44679  | 0.013853 | 0.299044 |
| LRRC50   | 0.173322 | 0.165184 | -0.06938 | 0.20947  |
| TOP1P2   | 0.437014 | 0.42432  | -0.04253 | 0.633128 |
| PLEKHG4B | 0.501718 | 0.5608   | 0.160608 | 0.009426 |
| GPRC5C   | 0.30413  | 0.268373 | -0.18045 | 0.00726  |
| MIR196B  | 0.078938 | 0.072629 | -0.12018 | 0.44364  |
| SIT1     | 0.791899 | 0.760484 | -0.0584  | 0.010783 |
| HNRNPA3  | 0.173184 | 0.175676 | 0.020614 | 0.282045 |
| ZSCAN5A  | 0.463781 | 0.507558 | 0.130129 | 0.048589 |
| SLC24A1  | 0.589972 | 0.577208 | -0.03156 | 0.108649 |
| EHD2     | 0.334387 | 0.34994  | 0.065589 | 0.191466 |
| MGAT5B   | 0.49889  | 0.495025 | -0.01122 | 0.362601 |
| SUOX     | 0.179147 | 0.165648 | -0.11303 | 0.032369 |
| LYSMD2   | 0.147565 | 0.153075 | 0.052886 | 0.113877 |
| PI4K2B   | 0.118572 | 0.119393 | 0.009949 | 0.499519 |
| SBSN     | 0.385937 | 0.383356 | -0.00968 | 0.854056 |
| IL4I1    | 0.30523  | 0.307983 | 0.012952 | 0.753264 |
| MTSS1    | 0.328711 | 0.32933  | 0.002716 | 0.558927 |
| IL22RA1  | 0.518532 | 0.462897 | -0.16374 | 0.051867 |
| PCGEM1   | 0.649925 | 0.741759 | 0.190678 | 0.00649  |
| OR2D2    | 0.189799 | 0.194531 | 0.035524 | 0.927645 |
| SFRS2B   | 0.122445 | 0.114943 | -0.09121 | 0.140509 |
| ADH1C    | 0.296393 | 0.329099 | 0.151011 | 0.085303 |
| IFI27    | 0.444148 | 0.445095 | 0.003072 | 0.535677 |
| LIMA1    | 0.346993 | 0.340768 | -0.02611 | 0.38895  |
| CSDA     | 0.079142 | 0.075304 | -0.07171 | 0.22687  |
| NUAK1    | 0.453234 | 0.453533 | 0.000949 | 0.931345 |
| MLF1IP   | 0.060267 | 0.062337 | 0.048726 | 0.432636 |
| NDUFB10  | 0.171108 | 0.165548 | -0.04766 | 0.112286 |

|           |          |          |          |          |
|-----------|----------|----------|----------|----------|
| NMT1      | 0.519324 | 0.520624 | 0.003607 | 0.832194 |
| PTCRA     | 0.58634  | 0.562384 | -0.06018 | 0.051308 |
| NOVA2     | 0.410106 | 0.419443 | 0.032478 | 0.295808 |
| SULT1C3   | 0.406744 | 0.475621 | 0.225691 | 0.229569 |
| DCDC1     | 0.052789 | 0.046008 | -0.19838 | 0.611732 |
| EPB41L3   | 0.148558 | 0.154177 | 0.053554 | 0.104606 |
| FAM70A    | 0.210566 | 0.230184 | 0.128516 | 0.122084 |
| C3orf1    | 0.18009  | 0.173981 | -0.04979 | 0.221546 |
| ZNF665    | 0.110353 | 0.116373 | 0.076639 | 0.052997 |
| FAM171A2  | 0.278134 | 0.290461 | 0.062564 | 0.252931 |
| MIR92A1   | 0.588371 | 0.524337 | -0.16623 | 0.156187 |
| MRPL13    | 0.316898 | 0.320394 | 0.015829 | 0.790669 |
| RBMXL3    | 0.685699 | 0.697633 | 0.024893 | 0.274817 |
| KANK4     | 0.527776 | 0.520063 | -0.02124 | 0.514425 |
| PNPO      | 0.186849 | 0.188975 | 0.016319 | 0.524997 |
| TRIM53    | 0.54169  | 0.572976 | 0.081006 | 0.226872 |
| CDC40     | 0.373045 | 0.378052 | 0.019238 | 0.428554 |
| MRAS      | 0.391089 | 0.391286 | 0.000724 | 0.742678 |
| PGF       | 0.355714 | 0.345907 | -0.04033 | 0.127227 |
| IL20RB    | 0.41162  | 0.415466 | 0.013419 | 0.484844 |
| GRLF1     | 0.497819 | 0.497027 | -0.0023  | 0.587452 |
| LOC44104  | 0.081386 | 0.073336 | -0.15026 | 0.794257 |
| VWA5A     | 0.361961 | 0.335811 | -0.10818 | 0.010784 |
| HBQ1      | 0.121122 | 0.124989 | 0.045349 | 0.198688 |
| EML1      | 0.572217 | 0.568479 | -0.00945 | 0.367524 |
| POLE2     | 0.204254 | 0.207034 | 0.019498 | 0.40583  |
| MIR629    | 0.948013 | 0.945541 | -0.00377 | 0.343598 |
| TMEM138   | 0.233937 | 0.23092  | -0.01873 | 0.512924 |
| LOC10019  | 0.061598 | 0.060047 | -0.03681 | 0.306688 |
| LOC14688  | 0.40474  | 0.383157 | -0.07906 | 0.199505 |
| PRPF38B   | 0.122584 | 0.123211 | 0.007354 | 0.546462 |
| ARG1      | 0.688074 | 0.70934  | 0.043912 | 0.018453 |
| DDX31     | 0.45002  | 0.447601 | -0.00778 | 0.55112  |
| CHAC1     | 0.29466  | 0.291584 | -0.01514 | 0.598729 |
| C15orf60  | 0.660899 | 0.641485 | -0.04301 | 0.01904  |
| TOE1      | 0.835575 | 0.851114 | 0.026583 | 0.049388 |
| SH3BP5L   | 0.405202 | 0.403732 | -0.00524 | 0.753264 |
| VDAC2     | 0.183979 | 0.187722 | 0.029058 | 0.267716 |
| SGSH      | 0.848855 | 0.840738 | -0.01386 | 0.027277 |
| PDDC1     | 0.342    | 0.344927 | 0.012295 | 0.424493 |
| ARID3B    | 0.216347 | 0.221897 | 0.036542 | 0.21979  |
| CD38      | 0.207892 | 0.200883 | -0.04948 | 0.450601 |
| C3orf15   | 0.138013 | 0.1157   | -0.25442 | 0.059291 |
| CCDC83    | 0.195814 | 0.200778 | 0.036121 | 0.413769 |
| VPS8      | 0.286441 | 0.287353 | 0.00459  | 0.66495  |
| LDHAL6B   | 0.746916 | 0.778032 | 0.058884 | 0.442257 |
| PANK1     | 0.198023 | 0.199886 | 0.01351  | 0.411114 |
| KIAA1026  | 0.426348 | 0.421084 | -0.01792 | 0.400588 |
| LOC14582  | 0.768292 | 0.741901 | -0.05043 | 0.27584  |
| C20orf111 | 0.155334 | 0.153846 | -0.01388 | 0.744439 |
| EIF2AK1   | 0.333358 | 0.333186 | -0.00075 | 0.883376 |
| SLC40A1   | 0.155348 | 0.158482 | 0.028817 | 0.606843 |
| ARL13B    | 0.252539 | 0.256582 | 0.022915 | 0.925794 |
| OR51B5    | 0.311859 | 0.335664 | 0.106124 | 1        |
| LOC38945  | 0.214703 | 0.215703 | 0.006704 | 0.460446 |
| PTBP2     | 0.196964 | 0.20214  | 0.037421 | 0.197878 |

|           |          |          |          |          |
|-----------|----------|----------|----------|----------|
| S100A11   | 0.101296 | 0.108897 | 0.104394 | 0.081566 |
| NHLRC4    | 0.314725 | 0.308483 | -0.0289  | 0.337401 |
| LOC10013  | 0.259861 | 0.244825 | -0.08599 | 0.022223 |
| ENOX1     | 0.521436 | 0.52784  | 0.017611 | 0.302305 |
| ELAVL4    | 0.28877  | 0.281908 | -0.0347  | 0.521966 |
| FAM184B   | 0.386687 | 0.399736 | 0.047883 | 0.080754 |
| ASAH2B    | 0.106367 | 0.107649 | 0.017293 | 0.461861 |
| MPP4      | 0.470926 | 0.484113 | 0.039844 | 0.538748 |
| CCDC157   | 0.126576 | 0.127193 | 0.007014 | 0.938752 |
| GLT8D2    | 0.205324 | 0.174312 | -0.23624 | 0.041846 |
| PRAMEF4   | 0.388962 | 0.364545 | -0.09353 | 0.129568 |
| SSH3      | 0.287195 | 0.264866 | -0.11677 | 0.117106 |
| ZNF259    | 0.254953 | 0.245906 | -0.05212 | 0.095483 |
| TMEM95    | 0.590325 | 0.575846 | -0.03583 | 0.141767 |
| PAPSS2    | 0.30761  | 0.30282  | -0.02264 | 0.434006 |
| PPP2R5D   | 0.198944 | 0.19521  | -0.02733 | 0.503968 |
| NCOA4     | 0.318147 | 0.318718 | 0.002587 | 0.763896 |
| POLR2D    | 0.117868 | 0.114883 | -0.037   | 0.21631  |
| SLC5A2    | 0.42021  | 0.426163 | 0.020294 | 0.71991  |
| SHANK3    | 0.475704 | 0.473176 | -0.00769 | 0.438122 |
| PTPRU     | 0.344336 | 0.327808 | -0.07097 | 0.013494 |
| TRAF6     | 0.1743   | 0.176553 | 0.018527 | 0.692227 |
| ABCB1     | 0.251626 | 0.244996 | -0.03852 | 0.161    |
| HSPA14    | 0.273385 | 0.273264 | -0.00064 | 0.794259 |
| CLDN20    | 0.812446 | 0.837675 | 0.044117 | 0.061518 |
| PDS5A     | 0.133197 | 0.136069 | 0.030775 | 0.21631  |
| MIR107    | 0.921149 | 0.917264 | -0.0061  | 0.082352 |
| RARG      | 0.224289 | 0.214909 | -0.06163 | 0.266714 |
| SLC5A12   | 0.411104 | 0.444659 | 0.113197 | 0.225978 |
| WFS1      | 0.475156 | 0.466027 | -0.02799 | 0.106614 |
| LILRA5    | 0.104633 | 0.11604  | 0.149286 | 0.156186 |
| ATF7      | 0.268407 | 0.277331 | 0.047186 | 0.229567 |
| C17orf103 | 0.440564 | 0.438421 | -0.00704 | 0.64812  |
| FAM81B    | 0.472872 | 0.503775 | 0.091332 | 0.093192 |
| TLN2      | 0.693055 | 0.689815 | -0.00676 | 0.413762 |
| TMEM33    | 0.139746 | 0.143612 | 0.039373 | 0.228665 |
| MIR501    | 0.629422 | 0.649277 | 0.044807 | 0.292592 |
| EXOC3L    | 0.590777 | 0.575125 | -0.03874 | 0.144951 |
| QTRT1     | 0.417501 | 0.409895 | -0.02653 | 0.275841 |
| WDR93     | 0.106938 | 0.10491  | -0.02763 | 0.716428 |
| FBXW9     | 0.131285 | 0.130936 | -0.00384 | 0.903628 |
| C3orf70   | 0.248238 | 0.241873 | -0.03748 | 0.135561 |
| ATG10     | 0.377263 | 0.382479 | 0.019811 | 0.456212 |
| MX2       | 0.20916  | 0.238164 | 0.187353 | 0.062171 |
| LYRM2     | 0.098861 | 0.101045 | 0.031531 | 0.260739 |
| WFDC9     | 0.232607 | 0.227034 | -0.03498 | 0.670033 |
| ST6GALNA  | 0.575266 | 0.558853 | -0.04176 | 0.061845 |
| SYT15     | 0.430909 | 0.408151 | -0.07828 | 0.460446 |
| C19orf38  | 0.562177 | 0.525973 | -0.09604 | 0.022913 |
| DTHD1     | 0.518648 | 0.553722 | 0.094407 | 0.122085 |
| GMNN      | 0.111652 | 0.107251 | -0.05802 | 0.883375 |
| NAT2      | 0.4387   | 0.443268 | 0.014947 | 0.549569 |
| WDR7      | 0.209612 | 0.210046 | 0.002985 | 0.693946 |
| NEK6      | 0.423    | 0.407976 | -0.05217 | 0.10712  |
| TECPR2    | 0.5344   | 0.527504 | -0.01874 | 0.131938 |
| MIR890    | 0.325464 | 0.294434 | -0.14455 | 0.108651 |

|           |          |          |          |          |
|-----------|----------|----------|----------|----------|
| PHGDH     | 0.193944 | 0.20173  | 0.056789 | 0.509931 |
| PPM1G     | 0.247142 | 0.244349 | -0.01639 | 0.633128 |
| TBX15     | 0.165428 | 0.155232 | -0.09178 | 0.626512 |
| CCBP2     | 0.325894 | 0.306581 | -0.08813 | 0.002688 |
| TNN       | 0.588631 | 0.577885 | -0.02658 | 0.122083 |
| CCDC162   | 0.735758 | 0.748165 | 0.024125 | 0.248127 |
| TP53TG3B  | 0.735646 | 0.690842 | -0.09066 | 0.113343 |
| FLJ34503  | 0.778474 | 0.760199 | -0.03427 | 0.756801 |
| USP45     | 0.110162 | 0.11325  | 0.03989  | 0.199503 |
| GPR183    | 0.548268 | 0.561706 | 0.034932 | 0.23687  |
| PLAGL2    | 0.344714 | 0.338632 | -0.02568 | 0.454805 |
| AGPHD1    | 0.068952 | 0.063479 | -0.11931 | 0.018686 |
| C1QL4     | 0.417455 | 0.406897 | -0.03696 | 0.641439 |
| SLC27A3   | 0.227383 | 0.241298 | 0.085691 | 0.006221 |
| PLEKHA5   | 0.462336 | 0.473723 | 0.035101 | 0.303399 |
| OR1S1     | 0.166909 | 0.173374 | 0.054831 | 0.524996 |
| ATCAY     | 0.40997  | 0.39944  | -0.03754 | 0.208624 |
| CLRN1OS   | 0.619979 | 0.664361 | 0.099747 | 0.228665 |
| ATXN2     | 0.24578  | 0.248183 | 0.014034 | 0.403204 |
| TTY5      | 0.475487 | 0.453303 | -0.06893 | 0.737333 |
| KRT36     | 0.576283 | 0.570132 | -0.01548 | 0.34093  |
| LOC40105  | 0.216566 | 0.211857 | -0.03171 | 0.239651 |
| HNRNPD    | 0.124379 | 0.120841 | -0.04163 | 0.432636 |
| RAD9B     | 0.389758 | 0.403753 | 0.050893 | 0.361376 |
| RAD21L1   | 0.15106  | 0.1397   | -0.11279 | 0.136785 |
| CBR1      | 0.229772 | 0.226343 | -0.02169 | 0.487761 |
| TNFSF14   | 0.168307 | 0.170343 | 0.017347 | 0.962857 |
| MAD2L1BF  | 0.125082 | 0.12376  | -0.01533 | 0.661571 |
| FCHSD2    | 0.449692 | 0.452337 | 0.008461 | 0.778142 |
| TRAM1L1   | 0.145093 | 0.159325 | 0.134995 | 0.452001 |
| ARHGEF17  | 0.368992 | 0.360333 | -0.03426 | 0.072989 |
| BEND2     | 0.694249 | 0.705388 | 0.022964 | 0.601969 |
| FAM113B   | 0.563364 | 0.562499 | -0.00222 | 0.760347 |
| FMOD      | 0.5088   | 0.458562 | -0.14998 | 0.019889 |
| DAZAP2    | 0.170517 | 0.172326 | 0.015226 | 0.395394 |
| DPY19L3   | 0.105368 | 0.101781 | -0.04997 | 0.362602 |
| CEMP1     | 0.2216   | 0.215962 | -0.03718 | 0.114945 |
| EPHA10    | 0.25045  | 0.248988 | -0.00844 | 0.629816 |
| LOC38949  | 0.361988 | 0.412535 | 0.188575 | 0.031623 |
| LRWD1     | 0.48693  | 0.493885 | 0.020461 | 0.590668 |
| RAB40B    | 0.5031   | 0.497827 | -0.0152  | 0.282044 |
| MIRLET7B  | 0.684143 | 0.649719 | -0.07448 | 0.141767 |
| GIMAP1    | 0.336235 | 0.347729 | 0.048494 | 0.452001 |
| ZNF224    | 0.113415 | 0.111318 | -0.02692 | 0.746199 |
| ANO4      | 0.403465 | 0.393311 | -0.03677 | 0.681949 |
| TUSC3     | 0.248518 | 0.251749 | 0.018634 | 0.35893  |
| STX7      | 0.227946 | 0.223729 | -0.02694 | 0.436746 |
| C14orf129 | 0.834859 | 0.879698 | 0.075476 | 0.000168 |
| PLA2G2E   | 0.417157 | 0.407533 | -0.03367 | 0.477597 |
| GLT25D2   | 0.389582 | 0.391718 | 0.007886 | 0.865028 |
| TAT       | 0.284799 | 0.27661  | -0.04209 | 0.573108 |
| SIRPD     | 0.314639 | 0.310781 | -0.0178  | 0.732141 |
| RPAP3     | 0.149794 | 0.152131 | 0.022341 | 0.540287 |
| PLXDC1    | 0.289761 | 0.264112 | -0.13371 | 0.004277 |
| PTPN13    | 0.150042 | 0.150243 | 0.001934 | 1        |
| STX2      | 0.371778 | 0.368968 | -0.01094 | 0.382575 |

|           |          |          |          |          |
|-----------|----------|----------|----------|----------|
| SC4MOL    | 0.119111 | 0.114893 | -0.05201 | 0.608471 |
| FCAMR     | 0.460891 | 0.441011 | -0.06361 | 0.234114 |
| POU6F2    | 0.465568 | 0.449272 | -0.0514  | 0.145594 |
| ASB5      | 0.746412 | 0.775508 | 0.055169 | 0.059918 |
| DCTN6     | 0.175501 | 0.176441 | 0.007701 | 0.763896 |
| FNBP4     | 0.2937   | 0.300291 | 0.032021 | 0.209468 |
| CCDC27    | 0.356262 | 0.339376 | -0.07006 | 0.165926 |
| SFRS7     | 0.238046 | 0.221169 | -0.10609 | 0.07006  |
| C6orf227  | 0.475286 | 0.457063 | -0.0564  | 0.474714 |
| B4GALNT3  | 0.344167 | 0.340728 | -0.01449 | 0.511424 |
| AXL       | 0.060733 | 0.063541 | 0.065198 | 0.905472 |
| SNORD116  | 0.626638 | 0.630731 | 0.009391 | 0.737403 |
| NUP153    | 0.140825 | 0.142063 | 0.012631 | 0.45903  |
| RPS28     | 0.472834 | 0.483562 | 0.032367 | 0.363831 |
| RAB9A     | 0.264425 | 0.258782 | -0.03112 | 0.673429 |
| C1orf107  | 0.180812 | 0.179529 | -0.01027 | 0.66495  |
| ZNF653    | 0.438424 | 0.4341   | -0.0143  | 0.619924 |
| REG1B     | 0.857984 | 0.849464 | -0.0144  | 0.552669 |
| OR10P1    | 0.299834 | 0.287622 | -0.05999 | 0.424493 |
| PTPLAD2   | 0.250612 | 0.250912 | 0.001726 | 0.413769 |
| CD2BP2    | 0.108309 | 0.110538 | 0.029391 | 0.128391 |
| ATXN7L3   | 0.385483 | 0.407583 | 0.080427 | 0.038893 |
| CSH1      | 0.546281 | 0.530769 | -0.04156 | 0.403205 |
| PI4K2A    | 0.131173 | 0.131313 | 0.001538 | 0.659883 |
| SLC28A1   | 0.496722 | 0.48229  | -0.04254 | 0.147536 |
| LOC64136  | 0.713417 | 0.704477 | -0.01819 | 0.210307 |
| KRT80     | 0.614625 | 0.581208 | -0.08065 | 0.020897 |
| CENPM     | 0.113691 | 0.109074 | -0.05981 | 0.117105 |
| NAA50     | 0.338151 | 0.347475 | 0.039239 | 0.466124 |
| ASTL      | 0.488441 | 0.470207 | -0.05489 | 0.336229 |
| UQCRC1    | 0.137785 | 0.140091 | 0.023947 | 0.711218 |
| FAM47E    | 0.036559 | 0.036565 | 0.000221 | 0.912853 |
| MIR1181   | 0.043696 | 0.043015 | -0.02267 | 0.675119 |
| MFAP4     | 0.276927 | 0.234262 | -0.24138 | 0.000681 |
| UBQLN2    | 0.133691 | 0.14663  | 0.133279 | 0.471842 |
| RBMXL1    | 0.404938 | 0.399709 | -0.01875 | 0.42449  |
| 15.Sep    | 0.065502 | 0.065557 | 0.001197 | 0.776355 |
| INPP5B    | 0.292342 | 0.285017 | -0.03661 | 0.18444  |
| MUC13     | 0.725762 | 0.675249 | -0.10408 | 0.009816 |
| CTSL3     | 0.537037 | 0.510219 | -0.0739  | 0.011992 |
| KIAA0754  | 0.143279 | 0.152706 | 0.091936 | 0.003476 |
| C20orf29  | 0.274323 | 0.277359 | 0.01588  | 0.470409 |
| FLJ35390  | 0.246889 | 0.230747 | -0.09755 | 0.087868 |
| LRRC17    | 0.49899  | 0.484627 | -0.04214 | 0.668337 |
| MOBKL2C   | 0.452136 | 0.439968 | -0.03936 | 0.206106 |
| CERCAM    | 0.230756 | 0.223316 | -0.04728 | 0.159611 |
| HSD17B12  | 0.390216 | 0.400498 | 0.037521 | 0.58106  |
| STAM      | 0.238358 | 0.2394   | 0.006293 | 0.51593  |
| TDGF1     | 0.496425 | 0.491751 | -0.01365 | 0.903629 |
| DBF4      | 0.113953 | 0.111876 | -0.02654 | 0.697387 |
| C14orf109 | 0.144928 | 0.146444 | 0.01501  | 0.707752 |
| ZNF239    | 0.328169 | 0.320227 | -0.03534 | 0.031255 |
| ARMCX2    | 0.283187 | 0.284808 | 0.008232 | 0.73916  |
| PFDN2     | 0.172115 | 0.173217 | 0.009212 | 0.756803 |
| ISG20     | 0.457135 | 0.449081 | -0.02564 | 0.273796 |
| PTGDR     | 0.248296 | 0.25661  | 0.047517 | 0.268724 |

|          |          |          |          |          |
|----------|----------|----------|----------|----------|
| FAM36A   | 0.037864 | 0.036074 | -0.06986 | 0.299019 |
| C1orf77  | 0.220533 | 0.220991 | 0.002993 | 0.439498 |
| RTN3     | 0.212404 | 0.21767  | 0.035335 | 0.267717 |
| LMO2     | 0.325778 | 0.30333  | -0.103   | 0.013146 |
| FLT3LG   | 0.06857  | 0.066195 | -0.05086 | 0.047013 |
| GTF2H1   | 0.26357  | 0.257095 | -0.03589 | 0.266714 |
| SKIV2L2  | 0.218283 | 0.22536  | 0.046025 | 0.261732 |
| KIAA2013 | 0.358268 | 0.357567 | -0.00283 | 0.732141 |
| FRY      | 0.382136 | 0.376769 | -0.02041 | 0.466124 |
| PARVA    | 0.439194 | 0.427879 | -0.03766 | 0.211165 |
| PIK3R4   | 0.097593 | 0.09008  | -0.11557 | 0.08874  |
| MFSD2A   | 0.211695 | 0.207863 | -0.02636 | 0.479042 |
| SPATA2L  | 0.320772 | 0.314752 | -0.02733 | 0.170235 |
| ISM2     | 0.403999 | 0.401233 | -0.00991 | 0.603593 |
| TMEM146  | 0.030416 | 0.030818 | 0.018933 | 0.137333 |
| ANKRD20A | 0.51433  | 0.532705 | 0.050644 | 0.416434 |
| NLRP5    | 0.235574 | 0.258863 | 0.136008 | 0.18989  |
| LOC22112 | 0.319833 | 0.31331  | -0.02973 | 0.477596 |
| TTBK2    | 0.141268 | 0.144801 | 0.035635 | 0.330409 |
| CBWD1    | 0.063461 | 0.055758 | -0.18669 | 0.11985  |
| SHH      | 0.086359 | 0.080989 | -0.09263 | 0.690508 |
| TMEM17   | 0.155745 | 0.153133 | -0.0244  | 0.377516 |
| RNF180   | 0.099055 | 0.104568 | 0.078128 | 0.199503 |
| TPTE     | 0.349076 | 0.366134 | 0.068832 | 0.105607 |
| LOC28457 | 0.295943 | 0.291143 | -0.02359 | 0.503966 |
| PSMG2    | 0.040127 | 0.040398 | 0.009726 | 0.565191 |
| MIR154   | 0.575744 | 0.562345 | -0.03397 | 0.181378 |
| ADAM22   | 0.057136 | 0.056929 | -0.00525 | 0.964712 |
| IL34     | 0.437528 | 0.422573 | -0.05018 | 0.350458 |
| LOC15130 | 0.76552  | 0.737094 | -0.05459 | 0.050204 |
| H19      | 0.682813 | 0.675336 | -0.01589 | 0.370014 |
| PYY      | 0.321754 | 0.315177 | -0.02979 | 0.168069 |
| FETUB    | 0.63739  | 0.627677 | -0.02215 | 0.76745  |
| FLJ35220 | 0.114106 | 0.11375  | -0.0045  | 0.801449 |
| FCRLA    | 0.160986 | 0.152975 | -0.07364 | 0.443644 |
| PTPN7    | 0.650919 | 0.63501  | -0.0357  | 0.526509 |
| OR2A2    | 0.222978 | 0.238787 | 0.098819 | 0.225086 |
| OTOP3    | 0.247774 | 0.225376 | -0.13669 | 0.007782 |
| TSN      | 0.128949 | 0.124058 | -0.05579 | 0.41911  |
| PPYR1    | 0.283622 | 0.253888 | -0.15978 | 0.045992 |
| LOC34007 | 0.542152 | 0.515817 | -0.07184 | 0.011449 |
| TMEM183  | 0.106926 | 0.109542 | 0.034863 | 0.210316 |
| THNSL1   | 0.213583 | 0.217918 | 0.028988 | 0.408467 |
| GPR113   | 0.28159  | 0.266191 | -0.08114 | 0.024201 |
| CPD      | 0.182792 | 0.186447 | 0.02856  | 0.423143 |
| GZMH     | 0.213308 | 0.203584 | -0.06732 | 0.597115 |
| GTPBP10  | 0.141143 | 0.135999 | -0.05356 | 0.354074 |
| ZNF235   | 0.144136 | 0.14837  | 0.041773 | 0.243391 |
| C19orf20 | 0.268445 | 0.277238 | 0.0465   | 0.151483 |
| ZDHHC8P  | 0.46901  | 0.481588 | 0.038181 | 0.606844 |
| BAZ1B    | 0.206216 | 0.202639 | -0.02524 | 0.506943 |
| PSMG3    | 0.296229 | 0.320647 | 0.114274 | 0.191468 |
| TTC7B    | 0.496269 | 0.495659 | -0.00177 | 0.740918 |
| C19orf59 | 0.209017 | 0.203379 | -0.03945 | 0.408468 |
| MST1R    | 0.725185 | 0.739949 | 0.029077 | 0.206942 |
| COL9A1   | 0.609921 | 0.586864 | -0.0556  | 0.042316 |

|           |          |          |           |          |
|-----------|----------|----------|-----------|----------|
| ARHGEF11  | 0.394636 | 0.393054 | -0.0058   | 0.872359 |
| CD163     | 0.242945 | 0.241641 | -0.00776  | 0.639774 |
| INSC      | 0.329128 | 0.323701 | -0.02399  | 0.631471 |
| WDR85     | 0.263931 | 0.269245 | 0.028759  | 0.367532 |
| NLGN1     | 0.272039 | 0.294068 | 0.11234   | 0.063488 |
| SLFN13    | 0.133369 | 0.133368 | -1.68E-05 | 0.416433 |
| WSB1      | 0.264274 | 0.266943 | 0.0145    | 0.43812  |
| TNFRSF8   | 0.325896 | 0.30916  | -0.07606  | 0.209468 |
| LOC100241 | 0.776161 | 0.716658 | -0.11507  | 0.006582 |
| MIR33A    | 0.630718 | 0.632266 | 0.003537  | 0.603592 |
| FAM90A9   | 0.540177 | 0.561343 | 0.055451  | 0.258776 |
| SLC35E1   | 0.1115   | 0.11042  | -0.01403  | 0.726889 |
| NANOS1    | 0.129988 | 0.112872 | -0.20369  | 0.055031 |
| SLC19A3   | 0.392875 | 0.386064 | -0.02523  | 0.587457 |
| CEP350    | 0.191981 | 0.191703 | -0.00209  | 0.615005 |
| AEBP2     | 0.305522 | 0.310961 | 0.025461  | 0.30013  |
| EIF4G1    | 0.562048 | 0.5553   | -0.01742  | 0.380041 |
| WDR72     | 0.144266 | 0.148687 | 0.043541  | 0.412439 |
| CCR2      | 0.21927  | 0.208987 | -0.06929  | 0.461862 |
| PCBP4     | 0.454205 | 0.455259 | 0.003344  | 0.535674 |
| KRT222    | 0.261836 | 0.229879 | -0.18779  | 0.197877 |
| CARD11    | 0.653492 | 0.640353 | -0.0293   | 0.238718 |
| ARFGEF2   | 0.115847 | 0.118661 | 0.034621  | 0.399288 |
| INSM1     | 0.099281 | 0.100813 | 0.022098  | 0.855883 |
| PCSK7     | 0.291715 | 0.285869 | -0.0292   | 0.346865 |
| PODN      | 0.474352 | 0.45842  | -0.04929  | 0.006354 |
| C5orf24   | 0.214001 | 0.21467  | 0.004503  | 0.592275 |
| RABL2A    | 0.752429 | 0.765308 | 0.024486  | 0.133736 |
| SPPL2B    | 0.458382 | 0.447865 | -0.03349  | 0.165213 |
| MAPK14    | 0.200733 | 0.197318 | -0.02475  | 0.461861 |
| POLR2J4   | 0.094331 | 0.094256 | -0.00114  | 0.76567  |
| EIF2S2    | 0.140898 | 0.14344  | 0.025797  | 0.248129 |
| KIAA1522  | 0.391354 | 0.389779 | -0.00582  | 0.611734 |
| DAGLA     | 0.438445 | 0.442767 | 0.014154  | 0.34806  |
| C1orf186  | 0.354314 | 0.356273 | 0.007953  | 0.574694 |
| LRRC2     | 0.464447 | 0.452067 | -0.03898  | 0.126648 |
| GSTTP1    | 0.324513 | 0.331419 | 0.030379  | 0.874194 |
| C11orf57  | 0.202265 | 0.198021 | -0.03059  | 0.457621 |
| LOC100131 | 0.228251 | 0.231643 | 0.021288  | 0.231379 |
| WFDC8     | 0.284845 | 0.277313 | -0.03866  | 0.961001 |
| QKI       | 0.365226 | 0.375413 | 0.03969   | 0.226871 |
| ISLR2     | 0.254644 | 0.281123 | 0.142717  | 0.216311 |
| LOC10013  | 0.113172 | 0.107552 | -0.07348  | 0.292592 |
| OR5V1     | 0.262658 | 0.271562 | 0.048093  | 0.643108 |
| SNORA64   | 0.785368 | 0.673081 | -0.22259  | 0.010429 |
| ARIH2     | 0.298274 | 0.290536 | -0.03792  | 0.238722 |
| YTHDC1    | 0.161298 | 0.166932 | 0.049532  | 0.19465  |
| ART1      | 0.538238 | 0.553831 | 0.041201  | 0.13075  |
| P4HA3     | 0.349449 | 0.349129 | -0.00132  | 0.810463 |
| LOC64712  | 0.20804  | 0.231261 | 0.152658  | 0.017003 |
| NFKBIE    | 0.466579 | 0.460117 | -0.02012  | 0.202787 |
| TSPY2     | 0.607656 | 0.559113 | -0.12011  | 0.46186  |
| GUSB      | 0.297383 | 0.301928 | 0.021883  | 0.358931 |
| KCNQ1OT   | 0.540886 | 0.551909 | 0.029107  | 0.167353 |
| HAUS7     | 0.295851 | 0.305693 | 0.04721   | 0.328103 |
| TRIP10    | 0.277088 | 0.289042 | 0.060937  | 0.194653 |

|           |          |          |          |          |
|-----------|----------|----------|----------|----------|
| BMP7      | 0.217516 | 0.200903 | -0.11462 | 0.032746 |
| PRAF2     | 0.226999 | 0.240079 | 0.080824 | 0.543373 |
| SARM1     | 0.381798 | 0.381824 | 9.67E-05 | 0.983281 |
| FKBP9L    | 0.115079 | 0.127187 | 0.144329 | 0.041845 |
| CYP11A1   | 0.460536 | 0.431145 | -0.09514 | 0.02077  |
| TRMT5     | 0.065782 | 0.065349 | -0.00953 | 0.907318 |
| STX18     | 0.351268 | 0.347433 | -0.01584 | 0.41111  |
| TRAM1     | 0.180312 | 0.201564 | 0.160743 | 0.000491 |
| PIGW      | 0.275132 | 0.278004 | 0.014982 | 0.644776 |
| BAIAP3    | 0.361785 | 0.340638 | -0.08689 | 0.007782 |
| AP2A1     | 0.407811 | 0.407397 | -0.00147 | 0.883376 |
| NOL9      | 0.187541 | 0.180836 | -0.05253 | 0.541829 |
| PDXDC2    | 0.043785 | 0.043277 | -0.01682 | 0.582642 |
| TSPAN2    | 0.129778 | 0.12751  | -0.02543 | 0.362603 |
| CRMP1     | 0.193721 | 0.196827 | 0.022952 | 0.123213 |
| C12orf10  | 0.058916 | 0.059521 | 0.014754 | 0.585847 |
| CPXM1     | 0.150243 | 0.150046 | -0.00189 | 0.67513  |
| TPP1      | 0.214193 | 0.215083 | 0.005982 | 0.794259 |
| IQCA1     | 0.477566 | 0.462698 | -0.04563 | 0.026805 |
| NCF1      | 0.594386 | 0.568015 | -0.06547 | 0.087437 |
| ABT1      | 0.417437 | 0.414155 | -0.01139 | 0.483392 |
| USP43     | 0.173915 | 0.166424 | -0.06352 | 0.440878 |
| OSBPL8    | 0.185249 | 0.187992 | 0.021209 | 0.639774 |
| HMOX2     | 0.271563 | 0.273917 | 0.012452 | 0.606844 |
| H1FO      | 0.22792  | 0.240049 | 0.074804 | 0.506944 |
| MUSK      | 0.492363 | 0.497023 | 0.01359  | 0.590665 |
| MIR2054   | 0.734649 | 0.849235 | 0.20911  | 0.000937 |
| PRMT1     | 0.217209 | 0.213165 | -0.02711 | 0.529559 |
| ZNF213    | 0.388296 | 0.387548 | -0.00278 | 0.916551 |
| UNC93B1   | 0.426204 | 0.421937 | -0.01452 | 0.514426 |
| OSGEP     | 0.28382  | 0.287373 | 0.017948 | 0.546465 |
| NME2P1    | 0.651318 | 0.647353 | -0.00881 | 0.479041 |
| PHF3      | 0.535156 | 0.562431 | 0.071718 | 0.127227 |
| EI24      | 0.125578 | 0.12148  | -0.04786 | 0.222426 |
| GZMM      | 0.342775 | 0.340158 | -0.01106 | 0.565209 |
| BBS2      | 0.179436 | 0.176822 | -0.02117 | 0.358931 |
| DYDC1     | 0.049139 | 0.051769 | 0.07523  | 0.101162 |
| EXOSC7    | 0.244344 | 0.228876 | -0.09435 | 0.069699 |
| CDKL5     | 0.186173 | 0.193145 | 0.05304  | 0.14051  |
| KIAA0430  | 0.66955  | 0.680868 | 0.024183 | 0.23411  |
| HIST1H2BI | 0.131201 | 0.193001 | 0.556828 | 0.313348 |
| TOMM20    | 0.442028 | 0.437343 | -0.01537 | 0.58106  |
| SKINTL    | 0.418843 | 0.41318  | -0.01964 | 0.767451 |
| ZNF662    | 0.279644 | 0.279986 | 0.001761 | 0.946164 |
| GDF7      | 0.134842 | 0.125526 | -0.10328 | 0.618282 |
| C9orf169  | 0.317766 | 0.306792 | -0.0507  | 0.313354 |
| TMPRSS2   | 0.209864 | 0.210989 | 0.007718 | 0.560492 |
| FEM1C     | 0.1017   | 0.104543 | 0.039778 | 0.189102 |
| PML       | 0.517914 | 0.5124   | -0.01544 | 0.314471 |
| C1orf172  | 0.255416 | 0.262197 | 0.037802 | 0.403207 |
| IFIT3     | 0.184105 | 0.193899 | 0.074778 | 0.582655 |
| PAK4      | 0.333724 | 0.330871 | -0.01239 | 0.587458 |
| NUDT10    | 0.308893 | 0.321868 | 0.05936  | 0.164506 |
| LOC64585  | 0.877705 | 0.870923 | -0.01119 | 0.450594 |
| NCRNA00   | 0.591321 | 0.580934 | -0.02557 | 0.8195   |
| ZSWIM7    | 0.206077 | 0.201738 | -0.0307  | 0.593886 |

|           |          |          |          |          |
|-----------|----------|----------|----------|----------|
| RWDD4A    | 0.23892  | 0.246943 | 0.047647 | 0.324661 |
| MGC15885  | 0.555041 | 0.573474 | 0.047134 | 0.069701 |
| C9orf103  | 0.323583 | 0.327561 | 0.017629 | 0.918399 |
| ASB16     | 0.386879 | 0.378471 | -0.0317  | 0.171691 |
| TKTL2     | 0.479087 | 0.543698 | 0.182521 | 0.032747 |
| KLHL14    | 0.401915 | 0.373096 | -0.10734 | 0.149501 |
| AGFG1     | 0.22841  | 0.230831 | 0.015216 | 0.868693 |
| EPHA6     | 0.262783 | 0.280941 | 0.096398 | 0.003829 |
| HESRG     | 0.603778 | 0.599452 | -0.01038 | 0.521965 |
| MIR1185.1 | 0.878041 | 0.872104 | -0.00979 | 0.476138 |
| CACNG6    | 0.219156 | 0.228695 | 0.061471 | 0.489223 |
| PDCL3     | 0.218431 | 0.217405 | -0.00679 | 0.981423 |
| MIR874    | 0.663546 | 0.665309 | 0.00383  | 0.681948 |
| C19orf21  | 0.523175 | 0.515238 | -0.02205 | 0.236867 |
| KCNMB1    | 0.416777 | 0.410752 | -0.02101 | 0.558925 |
| TRIM54    | 0.406604 | 0.446861 | 0.136204 | 0.086579 |
| TFAP2C    | 0.084444 | 0.084635 | 0.003247 | 0.935048 |
| PAPD5     | 0.221824 | 0.218164 | -0.02401 | 0.661571 |
| DHRS4     | 0.391364 | 0.379277 | -0.04526 | 0.357713 |
| SPTA1     | 0.288726 | 0.260738 | -0.1471  | 0.084462 |
| CCDC108   | 0.347407 | 0.335131 | -0.0519  | 0.047535 |
| CALHM1    | 0.68186  | 0.667934 | -0.02977 | 0.006444 |
| NCRNA001  | 0.284696 | 0.288312 | 0.018206 | 0.23872  |
| OLFML1    | 0.47711  | 0.472819 | -0.01303 | 0.464701 |
| LOC44089  | 0.462824 | 0.417359 | -0.14918 | 0.247179 |
| C12orf54  | 0.391456 | 0.399849 | 0.030604 | 0.67173  |
| SURF6     | 0.531716 | 0.524918 | -0.01856 | 0.277895 |
| ELMOD2    | 0.096787 | 0.099425 | 0.0388   | 0.29259  |
| LRRC39    | 0.409175 | 0.432331 | 0.079418 | 0.122649 |
| TMPRSS12  | 0.619326 | 0.633826 | 0.033388 | 0.304497 |
| IKZF5     | 0.112585 | 0.118037 | 0.068221 | 0.158235 |
| CACNA1C   | 0.578071 | 0.578935 | 0.002155 | 0.953581 |
| MCCD1     | 0.556505 | 0.569195 | 0.032528 | 0.087869 |
| SNORD111  | 0.174098 | 0.165192 | -0.07575 | 0.392809 |
| KLHL9     | 0.109666 | 0.094662 | -0.21226 | 0.144307 |
| ERGIC1    | 0.34575  | 0.349272 | 0.014621 | 0.554238 |
| QRSL1     | 0.219165 | 0.217532 | -0.01079 | 0.888892 |
| OR5K4     | 0.616045 | 0.71207  | 0.208984 | 0.000609 |
| GLIS1     | 0.567587 | 0.549179 | -0.04757 | 0.006309 |
| PLIN3     | 0.303174 | 0.308475 | 0.025011 | 0.69911  |
| OR2L8     | 0.209585 | 0.221042 | 0.076787 | 0.528038 |
| BHMT2     | 0.238296 | 0.272383 | 0.19288  | 0.116023 |
| C1orf111  | 0.700998 | 0.716704 | 0.031968 | 0.350455 |
| STAC      | 0.120013 | 0.117025 | -0.03637 | 0.746201 |
| QRICH2    | 0.878403 | 0.866717 | -0.01932 | 0.001971 |
| HNMT      | 0.21056  | 0.216641 | 0.041071 | 0.45762  |
| SNORA21   | 0.086908 | 0.084215 | -0.04542 | 0.72689  |
| LOC100281 | 0.047669 | 0.049161 | 0.04446  | 0.338562 |
| SEZ6L2    | 0.477303 | 0.48142  | 0.012389 | 0.287285 |
| WNT8A     | 0.659768 | 0.632894 | -0.05999 | 0.02778  |
| CLPTM1L   | 0.727219 | 0.720816 | -0.01276 | 0.320102 |
| ISL2      | 0.091679 | 0.090455 | -0.0194  | 0.192258 |
| DPYD      | 0.486374 | 0.494548 | 0.024044 | 0.805052 |
| SEMA3A    | 0.361793 | 0.370835 | 0.035612 | 0.190676 |
| LRP1      | 0.620317 | 0.618168 | -0.00501 | 0.693945 |
| MOG       | 0.377426 | 0.330684 | -0.19074 | 0.042317 |

|          |          |          |          |          |
|----------|----------|----------|----------|----------|
| VENTXP1  | 0.681817 | 0.698786 | 0.035467 | 0.585852 |
| KDM4DL   | 0.435619 | 0.418295 | -0.05855 | 0.194654 |
| BASE     | 0.259874 | 0.292768 | 0.171943 | 0.121525 |
| COQ7     | 0.168728 | 0.169316 | 0.005018 | 0.641439 |
| DLL3     | 0.219717 | 0.241876 | 0.138621 | 0.021819 |
| ERRFI1   | 0.408991 | 0.410227 | 0.004354 | 0.587455 |
| NEURL4   | 0.35436  | 0.353441 | -0.00374 | 0.805052 |
| PKN2     | 0.127663 | 0.126651 | -0.01148 | 0.521964 |
| FGF8     | 0.409057 | 0.418788 | 0.033916 | 0.350456 |
| ZDHHC5   | 0.172211 | 0.17344  | 0.010261 | 0.51593  |
| ZFYVE19  | 0.235349 | 0.235462 | 0.000693 | 0.839468 |
| ZG16B    | 0.330269 | 0.337836 | 0.032681 | 0.66326  |
| YWHAH    | 0.124152 | 0.12501  | 0.009941 | 0.659883 |
| CETN3    | 0.049131 | 0.046915 | -0.06659 | 0.661561 |
| UNK      | 0.29125  | 0.30876  | 0.08423  | 0.011679 |
| OR51M1   | 0.141571 | 0.145914 | 0.04359  | 0.621568 |
| TP53INP1 | 0.263145 | 0.265943 | 0.01526  | 0.562064 |
| SKAP2    | 0.107265 | 0.103853 | -0.04664 | 0.50993  |
| MYO10    | 0.497694 | 0.493688 | -0.01166 | 0.756802 |
| C5orf15  | 0.235671 | 0.235892 | 0.001349 | 0.79965  |
| NBEA     | 0.161499 | 0.196175 | 0.280615 | 0.001644 |
| ALS2CR4  | 0.162731 | 0.159067 | -0.03285 | 0.231379 |
| TCL1B    | 0.390759 | 0.383953 | -0.02535 | 0.810463 |
| HLA.DMA  | 0.347529 | 0.342045 | -0.02295 | 0.454807 |
| LIMS2    | 0.477792 | 0.478879 | 0.00328  | 0.477594 |
| RPS2P32  | 0.441245 | 0.431259 | -0.03303 | 0.531086 |
| TBC1D4   | 0.342975 | 0.346744 | 0.01577  | 0.348059 |
| OR5AC2   | 0.294126 | 0.369082 | 0.327507 | 0.000729 |
| ZNF414   | 0.319589 | 0.322432 | 0.012779 | 0.314472 |
| RLBP1    | 0.628528 | 0.613318 | -0.03534 | 0.350457 |
| FLOT1    | 0.235816 | 0.238681 | 0.017425 | 0.728639 |
| GGCT     | 0.042878 | 0.049134 | 0.1965   | 0.312228 |
| LOC10013 | 0.640262 | 0.649899 | 0.021554 | 0.474711 |
| ABL1     | 0.413084 | 0.405311 | -0.02741 | 0.241518 |
| KLRC4    | 0.665613 | 0.669136 | 0.007615 | 0.961001 |
| KIAA0141 | 0.109749 | 0.111102 | 0.01767  | 0.828563 |
| KIF5C    | 0.3639   | 0.374986 | 0.043297 | 0.167353 |
| NUDT17   | 0.083961 | 0.08815  | 0.070239 | 0.53261  |
| EML6     | 0.387767 | 0.384505 | -0.01219 | 0.385117 |
| NIPSNAP3 | 0.28444  | 0.297659 | 0.065537 | 0.060557 |
| C2orf86  | 0.40608  | 0.418215 | 0.042483 | 0.052147 |
| ELF2     | 0.196964 | 0.202611 | 0.040784 | 0.10411  |
| KIAA0368 | 0.150514 | 0.147647 | -0.02774 | 0.855882 |
| SVEP1    | 0.226262 | 0.235771 | 0.059396 | 0.116563 |
| EOMES    | 0.154129 | 0.139609 | -0.14275 | 0.18754  |
| UBA1     | 0.188998 | 0.192197 | 0.024216 | 0.205274 |
| ULK1     | 0.472694 | 0.467944 | -0.01457 | 0.442259 |
| NTNG2    | 0.269431 | 0.258024 | -0.06241 | 0.013939 |
| CADPS    | 0.442094 | 0.443201 | 0.00361  | 0.898098 |
| AP3M2    | 0.136832 | 0.145303 | 0.086654 | 0.034695 |
| TRIM37   | 0.067204 | 0.06967  | 0.051976 | 0.174625 |
| TMEM167  | 0.367041 | 0.371988 | 0.019316 | 0.49804  |
| GEFT     | 0.437997 | 0.445321 | 0.023925 | 0.326954 |
| EXOC3L2  | 0.201961 | 0.203477 | 0.010786 | 0.894414 |
| NOTCH1   | 0.388118 | 0.402114 | 0.051109 | 0.555799 |
| USHBP1   | 0.513144 | 0.492298 | -0.05983 | 0.144951 |

|          |          |          |           |          |
|----------|----------|----------|-----------|----------|
| ANKRD28  | 0.392477 | 0.397393 | 0.017956  | 0.721652 |
| DEFB104A | 0.65803  | 0.673186 | 0.032852  | 0.756803 |
| EIF3D    | 0.14563  | 0.145689 | 0.000581  | 0.881538 |
| USP21    | 0.248436 | 0.252013 | 0.020627  | 0.489222 |
| ALMS1P   | 0.415189 | 0.426164 | 0.037639  | 0.403206 |
| GNAQ     | 0.230081 | 0.234542 | 0.0277    | 0.35893  |
| MLNR     | 0.342724 | 0.342445 | -0.00117  | 0.938752 |
| DCAF10   | 0.048106 | 0.049109 | 0.029774  | 0.291514 |
| LOC28623 | 0.809614 | 0.79029  | -0.03485  | 0.135555 |
| PCGF1    | 0.182658 | 0.185107 | 0.019212  | 0.316718 |
| HLA.DQB1 | 0.042589 | 0.045192 | 0.085592  | 0.28728  |
| EFHD2    | 0.36889  | 0.359717 | -0.03633  | 0.094559 |
| YTHDF1   | 0.192546 | 0.191663 | -0.00663  | 0.9369   |
| FAM184A  | 0.305333 | 0.307601 | 0.010679  | 0.79965  |
| BRIP1    | 0.177223 | 0.180512 | 0.026534  | 0.248128 |
| DSC1     | 0.385049 | 0.39298  | 0.029414  | 0.890733 |
| MGAT4B   | 0.776956 | 0.784715 | 0.014336  | 0.323513 |
| XIST     | 0.68584  | 0.670908 | -0.03176  | 0.291525 |
| PIGV     | 0.139088 | 0.143345 | 0.043496  | 0.387671 |
| VT1B     | 0.144868 | 0.145697 | 0.008234  | 0.4548   |
| IL13     | 0.783849 | 0.770823 | -0.02418  | 0.096407 |
| UBASH3B  | 0.435488 | 0.426144 | -0.03129  | 0.342109 |
| TBC1D28  | 0.600333 | 0.596555 | -0.00911  | 0.399281 |
| IL12RB1  | 0.143986 | 0.133505 | -0.10904  | 0.030892 |
| NPLOC4   | 0.415085 | 0.411488 | -0.01256  | 0.56836  |
| STATH    | 0.272825 | 0.330781 | 0.277903  | 0.004404 |
| LCE1D    | 0.130766 | 0.120528 | -0.11761  | 0.23503  |
| LOC44094 | 0.03577  | 0.034299 | -0.06061  | 0.2915   |
| MIR1260  | 0.90105  | 0.902822 | 0.002833  | 0.905467 |
| FAM13B   | 0.135686 | 0.139038 | 0.035202  | 0.116022 |
| BSG      | 0.403631 | 0.395284 | -0.03015  | 0.163098 |
| PCGF2    | 0.254794 | 0.251937 | -0.01627  | 0.544918 |
| DST      | 0.434741 | 0.44196  | 0.02376   | 0.228665 |
| SPATS1   | 0.215267 | 0.205211 | -0.06901  | 0.425844 |
| MARS2    | 0.118126 | 0.117666 | -0.00562  | 0.611735 |
| H3F3A    | 0.086757 | 0.082782 | -0.06766  | 0.190675 |
| MSH4     | 0.582528 | 0.598472 | 0.038958  | 0.076019 |
| MIR135A2 | 0.680818 | 0.569027 | -0.25877  | 0.010498 |
| ADORA3   | 0.478641 | 0.432213 | -0.1472   | 0.007782 |
| ZNF701   | 0.239812 | 0.242532 | 0.016272  | 0.324659 |
| MAPK8IP3 | 0.600746 | 0.596619 | -0.00995  | 0.451999 |
| FAM55B   | 0.536243 | 0.551109 | 0.039452  | 0.086579 |
| PMVK     | 0.186579 | 0.187027 | 0.003461  | 0.812268 |
| TMEM81   | 0.666204 | 0.67138  | 0.011166  | 0.324654 |
| ESCO1    | 0.193929 | 0.20281  | 0.0646    | 0.027453 |
| SCAPER   | 0.464819 | 0.477871 | 0.039951  | 0.716428 |
| SSSCA1   | 0.022955 | 0.024128 | 0.071881  | 0.124852 |
| MIR519A1 | 0.330772 | 0.354607 | 0.100384  | 0.236871 |
| ARMC8    | 0.253326 | 0.255972 | 0.01499   | 0.310011 |
| KCNK18   | 0.698044 | 0.709671 | 0.023834  | 0.081564 |
| NLRP9    | 0.238641 | 0.232745 | -0.03609  | 0.512926 |
| ANXA7    | 0.094589 | 0.096837 | 0.033899  | 0.228666 |
| CDH26    | 0.49915  | 0.484905 | -0.04177  | 0.110716 |
| TP53INP2 | 0.169128 | 0.174709 | 0.046839  | 0.397986 |
| LOC28504 | 0.374889 | 0.383209 | 0.031669  | 0.521965 |
| PKIG     | 0.175808 | 0.175798 | -8.13E-05 | 0.909164 |

|           |          |          |          |          |
|-----------|----------|----------|----------|----------|
| TSPAN33   | 0.261881 | 0.263308 | 0.007845 | 0.964713 |
| PDCD2L    | 0.038741 | 0.039153 | 0.015274 | 0.170218 |
| GGNBP1    | 0.360111 | 0.328722 | -0.13158 | 0.002857 |
| IL1F5     | 0.385442 | 0.381292 | -0.01562 | 0.931346 |
| RUVBL2    | 0.216635 | 0.211462 | -0.03487 | 0.281004 |
| ZNF595    | 0.141728 | 0.142517 | 0.008013 | 0.972138 |
| WTAP      | 0.253709 | 0.262808 | 0.050835 | 0.070782 |
| HRASLS    | 0.127594 | 0.13669  | 0.099352 | 0.263717 |
| C14orf148 | 0.516577 | 0.514787 | -0.00501 | 0.611735 |
| L3MBTL    | 0.5674   | 0.556437 | -0.02815 | 0.454803 |
| PARP16    | 0.069803 | 0.07022  | 0.008582 | 0.65315  |
| GCNT1     | 0.42629  | 0.418158 | -0.02779 | 0.201141 |
| PROK1     | 0.586316 | 0.538717 | -0.12215 | 0.107628 |
| AMPD1     | 0.505859 | 0.497279 | -0.02468 | 0.584254 |
| SMCP      | 0.200999 | 0.204656 | 0.026015 | 0.76923  |
| BZW1      | 0.256979 | 0.253863 | -0.0176  | 0.51593  |
| RAC1      | 0.444192 | 0.446769 | 0.008346 | 0.658197 |
| NDRG2     | 0.296655 | 0.305091 | 0.040452 | 0.308902 |
| UBL7      | 0.091917 | 0.089174 | -0.04371 | 0.487757 |
| C16orf78  | 0.574843 | 0.557181 | -0.04502 | 0.158235 |
| RUNX3     | 0.420448 | 0.410283 | -0.03531 | 0.109164 |
| BCHE      | 0.348311 | 0.383498 | 0.138845 | 0.029475 |
| C9orf80   | 0.103584 | 0.094809 | -0.1277  | 0.021028 |
| MIR329.2  | 0.777179 | 0.790242 | 0.024047 | 0.157548 |
| CD9       | 0.315843 | 0.322604 | 0.030555 | 0.412438 |
| NPIP      | 0.502659 | 0.498642 | -0.01157 | 0.386391 |
| PRG3      | 0.511343 | 0.493349 | -0.05168 | 0.138637 |
| LOC10012  | 0.091618 | 0.096246 | 0.071095 | 0.131336 |
| PBK       | 0.301752 | 0.311077 | 0.043908 | 0.226872 |
| OR56B1    | 0.376149 | 0.399578 | 0.087171 | 0.714691 |
| TMEM43    | 0.284583 | 0.280384 | -0.02145 | 0.400593 |
| FPR3      | 0.289222 | 0.311217 | 0.105743 | 0.114945 |
| INSM2     | 0.045635 | 0.044664 | -0.03104 | 0.46896  |
| LOC12183  | 0.644352 | 0.629976 | -0.03255 | 0.185984 |
| TET3      | 0.757653 | 0.758302 | 0.001234 | 0.772789 |
| TBC1D9B   | 0.526749 | 0.539151 | 0.033574 | 0.039557 |
| INS.IGF2  | 0.275945 | 0.267287 | -0.04599 | 0.095946 |
| ARFGAP1   | 0.455964 | 0.45033  | -0.01794 | 0.303399 |
| C8orf22   | 0.379243 | 0.401831 | 0.083466 | 0.577873 |
| TMEM150   | 0.534961 | 0.524452 | -0.02862 | 0.104606 |
| ITGA2     | 0.288493 | 0.28713  | -0.00683 | 0.940605 |
| GTF2B     | 0.273016 | 0.294945 | 0.11146  | 0.035707 |
| WDR5B     | 0.038813 | 0.038032 | -0.02932 | 0.411075 |
| TIMM10    | 0.160687 | 0.159414 | -0.01148 | 0.644776 |
| ERGIC3    | 0.033491 | 0.034954 | 0.061717 | 0.173098 |
| PLA2G5    | 0.554755 | 0.51837  | -0.09787 | 0.264712 |
| SOLH      | 0.571779 | 0.570591 | -0.003   | 0.681948 |
| YDJC      | 0.239271 | 0.235929 | -0.02029 | 0.464701 |
| SSR2      | 0.190702 | 0.187471 | -0.02465 | 0.67343  |
| HMGCR     | 0.077348 | 0.079775 | 0.044576 | 0.171688 |
| RARS      | 0.205645 | 0.207063 | 0.009908 | 0.785294 |
| ODF3B     | 0.121413 | 0.124602 | 0.0374   | 0.905473 |
| KRTAP13.2 | 0.3812   | 0.383214 | 0.007601 | 0.799651 |
| MFAP1     | 0.312739 | 0.313628 | 0.004093 | 0.80145  |
| PCOLCE2   | 0.208452 | 0.218442 | 0.067536 | 0.063486 |
| C1orf65   | 0.437998 | 0.427216 | -0.03596 | 0.479042 |

|           |          |          |          |          |
|-----------|----------|----------|----------|----------|
| SEMA3C    | 0.405018 | 0.417201 | 0.042759 | 0.293661 |
| VDR       | 0.307579 | 0.288047 | -0.09466 | 0.01057  |
| CENPH     | 0.111281 | 0.112923 | 0.021127 | 0.45621  |
| SLC25A18  | 0.582937 | 0.561707 | -0.05352 | 0.097819 |
| TRIM52    | 0.092059 | 0.096091 | 0.06184  | 0.464699 |
| CTNNA2    | 0.396717 | 0.396003 | -0.0026  | 0.938752 |
| TGFA      | 0.147631 | 0.141389 | -0.06232 | 0.354071 |
| SPEF2     | 0.261954 | 0.229345 | -0.19179 | 0.065506 |
| ASCC1     | 0.35798  | 0.368695 | 0.042548 | 0.028448 |
| APOA1     | 0.468074 | 0.461504 | -0.02039 | 0.179107 |
| SPATA6    | 0.219642 | 0.218153 | -0.00981 | 0.70602  |
| CDH2      | 0.27474  | 0.266475 | -0.04407 | 0.176855 |
| ANKRD23   | 0.77257  | 0.769563 | -0.00562 | 0.792461 |
| TEKT4     | 0.331298 | 0.334552 | 0.014101 | 0.810463 |
| CDRT1     | 0.544902 | 0.539217 | -0.01513 | 0.460446 |
| EXOG      | 0.152547 | 0.153873 | 0.012482 | 0.739159 |
| KIAA1239  | 0.208506 | 0.210538 | 0.013992 | 0.623214 |
| MTMR10    | 0.421857 | 0.417394 | -0.01534 | 0.558924 |
| ACSL5     | 0.498838 | 0.486474 | -0.03621 | 0.502483 |
| RTP1      | 0.50254  | 0.491261 | -0.03275 | 0.427197 |
| PDZD3     | 0.32031  | 0.323327 | 0.013524 | 0.563634 |
| RBM16     | 0.227129 | 0.231129 | 0.025184 | 0.396689 |
| EARS2     | 0.0454   | 0.047029 | 0.05087  | 0.070406 |
| LMBRD2    | 0.028791 | 0.029691 | 0.044407 | 0.336184 |
| BCL2L12   | 0.326607 | 0.290677 | -0.16814 | 0.024055 |
| TTY1      | 0.499272 | 0.449618 | -0.15112 | 0.392684 |
| LRRC7     | 0.510275 | 0.531178 | 0.057921 | 0.054444 |
| CLEC18A   | 0.741959 | 0.740427 | -0.00298 | 0.747959 |
| KCNK12    | 0.1825   | 0.178477 | -0.03216 | 0.05652  |
| RSF1      | 0.572193 | 0.584082 | 0.029667 | 0.193054 |
| OCM2      | 0.31682  | 0.315814 | -0.00459 | 0.603593 |
| COL27A1   | 0.409663 | 0.403003 | -0.02365 | 0.165213 |
| C14orf39  | 0.088634 | 0.086368 | -0.03737 | 0.57152  |
| AVEN      | 0.238621 | 0.228305 | -0.06376 | 0.325802 |
| NOTCH2    | 0.143025 | 0.162776 | 0.186627 | 0.073364 |
| NOS1      | 0.255524 | 0.25538  | -0.00081 | 0.830379 |
| PSKH1     | 0.429147 | 0.424772 | -0.01478 | 0.392808 |
| DMP1      | 0.594739 | 0.616875 | 0.05272  | 0.217174 |
| C3orf54   | 0.036036 | 0.03659  | 0.022006 | 0.11437  |
| KIAA1274  | 0.44831  | 0.434114 | -0.04642 | 0.056521 |
| LRRC37B2  | 0.44774  | 0.441648 | -0.01976 | 0.197875 |
| LPCAT2    | 0.354439 | 0.366619 | 0.048745 | 0.558927 |
| GSTT1     | 0.241393 | 0.22042  | -0.13113 | 0.175371 |
| ABRA      | 0.566279 | 0.577093 | 0.02729  | 0.439499 |
| WNK2      | 0.568889 | 0.565888 | -0.00763 | 0.521964 |
| IL27RA    | 0.18476  | 0.163393 | -0.17731 | 0.003915 |
| PSPH      | 0.142639 | 0.144176 | 0.015461 | 0.618282 |
| CALML4    | 0.728936 | 0.728608 | -0.00065 | 0.815881 |
| C10orf41  | 0.255723 | 0.239268 | -0.09596 | 0.201962 |
| HLX       | 0.334822 | 0.393386 | 0.23255  | 0.012891 |
| MEGF11    | 0.453149 | 0.441605 | -0.03723 | 0.105105 |
| RPS16     | 0.154881 | 0.15188  | -0.02824 | 0.446419 |
| C20orf135 | 0.812707 | 0.80761  | -0.00908 | 0.301204 |
| KLHL21    | 0.469032 | 0.461709 | -0.0227  | 0.503966 |
| EVC       | 0.236552 | 0.233165 | -0.0208  | 0.409788 |
| EHHADH    | 0.272592 | 0.269389 | -0.01705 | 0.262725 |

|          |          |          |          |          |
|----------|----------|----------|----------|----------|
| SLC4A4   | 0.315918 | 0.338922 | 0.101403 | 0.188319 |
| IMPDH1   | 0.242757 | 0.232306 | -0.06348 | 0.030712 |
| MCRS1    | 0.236847 | 0.234006 | -0.0174  | 0.528035 |
| SHISA9   | 0.321042 | 0.30761  | -0.06166 | 0.12781  |
| EHD3     | 0.180612 | 0.179959 | -0.00522 | 0.739159 |
| EEF1B2   | 0.169795 | 0.164462 | -0.04604 | 0.209468 |
| NRL      | 0.34146  | 0.338474 | -0.01267 | 0.711218 |
| PTCHD2   | 0.553069 | 0.559438 | 0.016519 | 0.376261 |
| GALNT12  | 0.131304 | 0.125182 | -0.06888 | 0.471841 |
| FN3K     | 0.407441 | 0.4266   | 0.066293 | 0.074114 |
| S100A14  | 0.72304  | 0.711003 | -0.02422 | 0.111761 |
| ADH1A    | 0.626035 | 0.639889 | 0.031579 | 0.646448 |
| MIR1278  | 0.894761 | 0.918868 | 0.038355 | 0.471787 |
| TREML3   | 0.349708 | 0.341426 | -0.03458 | 0.509931 |
| PRSS8    | 0.402252 | 0.375699 | -0.09852 | 0.125496 |
| MUCL1    | 0.245542 | 0.236237 | -0.05573 | 0.119853 |
| OR56A1   | 0.263244 | 0.275321 | 0.064714 | 0.649797 |
| KCNH4    | 0.397928 | 0.39453  | -0.01237 | 0.468978 |
| CGB      | 0.196318 | 0.192102 | -0.03132 | 0.633127 |
| PGM5     | 0.120214 | 0.115826 | -0.05365 | 0.460446 |
| UBA7     | 0.431577 | 0.401173 | -0.1054  | 0.012975 |
| EPM2A    | 0.227319 | 0.235225 | 0.049319 | 0.236871 |
| FAM181B  | 0.183352 | 0.178025 | -0.04253 | 0.273794 |
| CHRFAM7  | 0.501697 | 0.502209 | 0.001471 | 0.79067  |
| LOC10028 | 0.045705 | 0.044266 | -0.04613 | 0.569934 |
| PKP2     | 0.358221 | 0.367221 | 0.0358   | 0.555799 |
| MIR192   | 0.788198 | 0.769627 | -0.0344  | 0.042316 |
| FUK      | 0.340505 | 0.326441 | -0.06085 | 0.007728 |
| NCRNA000 | 0.155357 | 0.150166 | -0.04904 | 0.362603 |
| APBB1    | 0.122568 | 0.127143 | 0.052877 | 0.136169 |
| DHDH     | 0.136537 | 0.131489 | -0.05435 | 0.240582 |
| LIM2     | 0.657703 | 0.630155 | -0.06173 | 0.074871 |
| MIR1203  | 0.486839 | 0.453668 | -0.10181 | 0.289401 |
| DDX28    | 0.138893 | 0.131843 | -0.07515 | 0.023193 |
| P2RY12   | 0.625053 | 0.640389 | 0.034972 | 0.725142 |
| ITGB6    | 0.884902 | 0.883263 | -0.00267 | 0.457604 |
| MDS2     | 0.123624 | 0.120352 | -0.0387  | 0.794258 |
| LELP1    | 0.212153 | 0.202326 | -0.06843 | 0.173157 |
| SLC22A9  | 0.328281 | 0.350059 | 0.092668 | 0.173157 |
| C5orf43  | 0.288874 | 0.283808 | -0.02553 | 0.429914 |
| KDM5D    | 0.318058 | 0.295393 | -0.10666 | 0.589062 |
| SYAP1    | 0.1614   | 0.163305 | 0.01693  | 0.439499 |
| GPR120   | 0.093678 | 0.105763 | 0.175052 | 0.029648 |
| KRT38    | 0.472052 | 0.412934 | -0.19304 | 0.014679 |
| PAX7     | 0.234143 | 0.22637  | -0.04871 | 0.295807 |
| LOC25502 | 0.767867 | 0.785224 | 0.032247 | 0.523476 |
| SLC43A2  | 0.489656 | 0.477398 | -0.03658 | 0.1374   |
| TGM5     | 0.629611 | 0.613552 | -0.03728 | 0.120405 |
| SNX21    | 0.325052 | 0.32353  | -0.00677 | 0.643107 |
| BLMH     | 0.12534  | 0.124212 | -0.01304 | 0.71991  |
| TNFSF15  | 0.405463 | 0.380001 | -0.09357 | 0.203613 |
| SULT6B1  | 0.693866 | 0.691246 | -0.00546 | 0.210311 |
| NADK     | 0.59222  | 0.591424 | -0.00194 | 0.879701 |
| MFSD8    | 0.071257 | 0.074754 | 0.06912  | 0.127805 |
| C1QL2    | 0.119865 | 0.121724 | 0.022206 | 0.1495   |
| CYB5R2   | 0.361122 | 0.346349 | -0.06026 | 0.203613 |

|          |          |          |          |          |
|----------|----------|----------|----------|----------|
| RYR2     | 0.412764 | 0.416153 | 0.011796 | 0.424491 |
| RNF126P1 | 0.258384 | 0.247723 | -0.06079 | 0.193056 |
| LRRC37A3 | 0.124439 | 0.123972 | -0.00542 | 1        |
| CCDC61   | 0.225346 | 0.220053 | -0.03429 | 0.407149 |
| CXorf21  | 0.605152 | 0.628923 | 0.055586 | 0.308903 |
| SLC36A4  | 0.054749 | 0.05109  | -0.0998  | 0.358925 |
| OR2T1    | 0.394069 | 0.413163 | 0.068263 | 0.505454 |
| CDA      | 0.230522 | 0.212961 | -0.11431 | 0.243395 |
| STOX1    | 0.163793 | 0.167119 | 0.028999 | 0.156185 |
| RNASEN   | 0.319885 | 0.325412 | 0.024715 | 0.286233 |
| DDX58    | 0.253759 | 0.249899 | -0.02211 | 0.284133 |
| FCGR3A   | 0.310792 | 0.290733 | -0.09626 | 0.086152 |
| EBNA1BP2 | 0.296116 | 0.29619  | 0.000364 | 0.763896 |
| WNT9B    | 0.270538 | 0.250802 | -0.10929 | 0.013494 |
| SEMA4B   | 0.267907 | 0.258648 | -0.05074 | 0.054153 |
| C21orf7  | 0.342041 | 0.328768 | -0.0571  | 0.521966 |
| EIF1AY   | 0.159791 | 0.149141 | -0.09951 | 0.562063 |
| ZBTB26   | 0.223565 | 0.226531 | 0.019012 | 0.634786 |
| SPATA5L1 | 0.107938 | 0.112604 | 0.061059 | 0.194649 |
| DCXR     | 0.100027 | 0.102233 | 0.031471 | 0.356495 |
| UBD      | 0.151549 | 0.152525 | 0.009268 | 0.935048 |
| OR4N5    | 0.094949 | 0.08586  | -0.14518 | 0.067227 |
| ZRANB3   | 0.419177 | 0.438857 | 0.066188 | 0.016789 |
| DOLPP1   | 0.196732 | 0.188795 | -0.05941 | 0.058977 |
| EMID1    | 0.308938 | 0.300407 | -0.0404  | 0.045235 |
| MMEL1    | 0.468608 | 0.449744 | -0.05928 | 0.054152 |
| TIGD5    | 0.557408 | 0.531253 | -0.06934 | 0.199505 |
| COL21A1  | 0.291536 | 0.312522 | 0.100285 | 0.258776 |
| CCDC89   | 0.299246 | 0.279615 | -0.09789 | 0.289402 |
| OCEL1    | 0.080483 | 0.081059 | 0.010279 | 0.719909 |
| ROR2     | 0.528262 | 0.519479 | -0.02419 | 0.278931 |
| C16orf13 | 0.242773 | 0.233706 | -0.05491 | 0.068631 |
| CD302    | 0.273584 | 0.271977 | -0.0085  | 0.753264 |
| PHOSPHO  | 0.336325 | 0.344014 | 0.03261  | 0.388952 |
| FLJ39609 | 0.639685 | 0.611492 | -0.06503 | 0.227768 |
| STXBP4   | 0.224368 | 0.223819 | -0.00354 | 0.865029 |
| PEX7     | 0.107197 | 0.113885 | 0.087318 | 0.050205 |
| DOCK8    | 0.29021  | 0.285291 | -0.02466 | 0.783504 |
| RGN      | 0.713415 | 0.707509 | -0.01199 | 0.603585 |
| DRG1     | 0.218282 | 0.216639 | -0.0109  | 0.883375 |
| PLD4     | 0.506275 | 0.494245 | -0.0347  | 0.221546 |
| IQCF3    | 0.707084 | 0.691518 | -0.03212 | 0.774572 |
| DNAJC13  | 0.364895 | 0.368846 | 0.015535 | 0.699111 |
| AQP4     | 0.515012 | 0.511436 | -0.01005 | 0.810463 |
| PPAPDC2  | 0.089838 | 0.070722 | -0.34516 | 0.152814 |
| HN1      | 0.26154  | 0.25634  | -0.02897 | 0.646448 |
| NUBPL    | 0.116083 | 0.118581 | 0.030712 | 0.163799 |
| TDRD3    | 0.194148 | 0.199883 | 0.041996 | 0.101167 |
| C17orf90 | 0.228421 | 0.232554 | 0.025871 | 0.383845 |
| PRO1768  | 0.823712 | 0.814912 | -0.0155  | 0.089171 |
| NXPH1    | 0.302226 | 0.400563 | 0.4064   | 0.000345 |
| CLIC5    | 0.243458 | 0.264079 | 0.117292 | 0.262723 |
| CLIP1    | 0.32306  | 0.31875  | -0.01937 | 0.438123 |
| ZNF121   | 0.132846 | 0.134087 | 0.01341  | 0.405831 |
| NLRP4    | 0.253454 | 0.262645 | 0.05139  | 0.554238 |
| CTBP1    | 0.690635 | 0.687267 | -0.00705 | 0.511426 |

|           |          |          |          |          |
|-----------|----------|----------|----------|----------|
| RAB19     | 0.416339 | 0.383026 | -0.12032 | 0.011449 |
| PHF6      | 0.182211 | 0.197588 | 0.116884 | 0.202787 |
| FSCN3     | 0.327224 | 0.327087 | -0.0006  | 0.492154 |
| ITGA7     | 0.263047 | 0.250952 | -0.06791 | 0.235948 |
| MVK       | 0.256063 | 0.266665 | 0.058534 | 0.12435  |
| CYLD      | 0.185072 | 0.183026 | -0.01604 | 0.445029 |
| UXT       | 0.227524 | 0.232469 | 0.031022 | 0.306696 |
| GABRR3    | 0.738998 | 0.762811 | 0.045755 | 0.006628 |
| MIR1257   | 0.801802 | 0.796951 | -0.00875 | 0.412435 |
| GOLGA3    | 0.715731 | 0.708324 | -0.01501 | 0.172421 |
| CRCP      | 0.193625 | 0.196398 | 0.020516 | 0.509931 |
| NR3C1     | 0.304438 | 0.300305 | -0.01972 | 0.503968 |
| C6orf145  | 0.286584 | 0.259812 | -0.14149 | 0.116563 |
| MNX1      | 0.101277 | 0.109065 | 0.106882 | 0.249083 |
| ELAVL1    | 0.490972 | 0.491129 | 0.000461 | 0.988853 |
| CWH43     | 0.216511 | 0.233114 | 0.106597 | 0.106109 |
| ZNF620    | 0.141136 | 0.137612 | -0.03647 | 0.164505 |
| STXBP3    | 0.149803 | 0.148775 | -0.00994 | 0.72689  |
| EMP2      | 0.29257  | 0.27166  | -0.10698 | 0.146888 |
| MCF2L     | 0.639744 | 0.63132  | -0.01912 | 0.205269 |
| RWDD1     | 0.097875 | 0.095562 | -0.0345  | 0.680239 |
| XRCC4     | 0.176204 | 0.177122 | 0.007495 | 0.988853 |
| GIT1      | 0.501926 | 0.49102  | -0.03169 | 0.166638 |
| CCDC111   | 0.085442 | 0.088075 | 0.04378  | 0.438118 |
| SPINK6    | 0.911629 | 0.901428 | -0.01624 | 0.669977 |
| PLIN2     | 0.394736 | 0.398021 | 0.011956 | 0.260745 |
| VPREB1    | 0.317317 | 0.268678 | -0.24005 | 0.036326 |
| TSPAN15   | 0.154338 | 0.15349  | -0.00795 | 0.80325  |
| MIXL1     | 0.203214 | 0.19486  | -0.06056 | 0.154831 |
| UPF3B     | 0.134665 | 0.133227 | -0.01549 | 0.799651 |
| MGST3     | 0.162192 | 0.162479 | 0.002556 | 0.654832 |
| SLC22A10  | 0.448598 | 0.469454 | 0.065562 | 0.380042 |
| PIP4K2A   | 0.44691  | 0.449654 | 0.008829 | 0.549566 |
| KRT18     | 0.259477 | 0.241923 | -0.10106 | 0.06382  |
| HAND2     | 0.084875 | 0.080005 | -0.08525 | 0.069699 |
| ARF3      | 0.284454 | 0.279944 | -0.02306 | 0.345674 |
| UTP18     | 0.360514 | 0.355833 | -0.01886 | 0.256818 |
| LOC100131 | 0.21605  | 0.21374  | -0.01551 | 0.718167 |
| MIR7.3    | 0.089369 | 0.081944 | -0.12514 | 0.015553 |
| CDKN2A    | 0.133635 | 0.122039 | -0.13095 | 0.372506 |
| SAA3P     | 0.030624 | 0.027786 | -0.1403  | 0.340895 |
| WWC2      | 0.493954 | 0.516193 | 0.063533 | 0.132535 |
| IL17RE    | 0.306046 | 0.290582 | -0.07481 | 0.019041 |
| GVIN1     | 0.135539 | 0.143654 | 0.083889 | 0.457622 |
| CEP76     | 0.406262 | 0.42684  | 0.071287 | 0.306696 |
| LOC149131 | 0.599715 | 0.587    | -0.03092 | 0.479041 |
| LOC646211 | 0.210052 | 0.197725 | -0.08725 | 0.21287  |
| MIR208B   | 0.662347 | 0.643967 | -0.0406  | 0.306694 |
| F2RL2     | 0.355163 | 0.371982 | 0.066753 | 0.568362 |
| LOC401621 | 0.233878 | 0.200795 | -0.22003 | 0.181339 |
| ZNF268    | 0.128168 | 0.128627 | 0.005153 | 0.331568 |
| TLE3      | 0.395647 | 0.384528 | -0.04112 | 0.018339 |
| DRD2      | 0.275543 | 0.270819 | -0.02495 | 0.180621 |
| HSD17B13  | 0.43068  | 0.414831 | -0.05409 | 0.189888 |
| MAPK8IP2  | 0.37929  | 0.381454 | 0.008206 | 0.548015 |
| PCDH1     | 0.390375 | 0.404286 | 0.050514 | 0.050754 |

|           |          |          |          |          |
|-----------|----------|----------|----------|----------|
| FAM71F2   | 0.578393 | 0.587376 | 0.022234 | 0.195451 |
| LRRN1     | 0.354448 | 0.372784 | 0.072767 | 0.183672 |
| GCM1      | 0.512106 | 0.540155 | 0.076931 | 0.355285 |
| KRBA2     | 0.666491 | 0.664423 | -0.00448 | 0.723396 |
| PLA2G2A   | 0.361676 | 0.329154 | -0.13594 | 0.055922 |
| ASGR1     | 0.367493 | 0.334405 | -0.13612 | 0.014213 |
| TTY19     | 0.495348 | 0.459369 | -0.10879 | 0.833974 |
| ARID3C    | 0.306787 | 0.289397 | -0.08419 | 0.179862 |
| DNAJB11   | 0.46385  | 0.471644 | 0.024042 | 0.521965 |
| FAM20A    | 0.270562 | 0.281629 | 0.057832 | 0.492152 |
| HMGB2     | 0.068332 | 0.065467 | -0.06179 | 0.119851 |
| HSN2      | 0.838497 | 0.851133 | 0.021579 | 0.787077 |
| MIR300    | 0.410051 | 0.441908 | 0.107943 | 0.031256 |
| LOC100131 | 0.478043 | 0.473674 | -0.01325 | 0.680242 |
| ROBO4     | 0.634664 | 0.604805 | -0.06952 | 0.176859 |
| FREM1     | 0.471257 | 0.47426  | 0.009166 | 0.756802 |
| SPTY2D1   | 0.068116 | 0.069919 | 0.037694 | 0.481938 |
| SPNS1     | 0.175996 | 0.172199 | -0.03146 | 0.291525 |
| CDK13     | 0.171154 | 0.172925 | 0.014859 | 0.286231 |
| MIR506    | 0.445199 | 0.422118 | -0.0768  | 0.401898 |
| FAM122C   | 0.290825 | 0.297404 | 0.032271 | 0.343297 |
| PPM1B     | 0.255124 | 0.250384 | -0.02706 | 0.420452 |
| GUCY1A3   | 0.177815 | 0.185209 | 0.058774 | 0.188319 |
| IVL       | 0.287981 | 0.268393 | -0.10163 | 0.087871 |
| VWA3A     | 0.4705   | 0.461744 | -0.0271  | 0.420451 |
| VPS54     | 0.126121 | 0.129591 | 0.039157 | 0.042791 |
| HN1L      | 0.456625 | 0.451215 | -0.01719 | 0.33273  |
| BARX2     | 0.187874 | 0.18186  | -0.04694 | 0.498043 |
| INTS12    | 0.101183 | 0.103854 | 0.037592 | 0.295805 |
| FNIP1     | 0.233001 | 0.238157 | 0.031571 | 0.290462 |
| RAP1GAP   | 0.37268  | 0.361117 | -0.04547 | 0.073364 |
| ALOX5AP   | 0.564246 | 0.550409 | -0.03582 | 0.168787 |
| MED4      | 0.039585 | 0.040093 | 0.018375 | 0.543353 |
| OR10G4    | 0.317732 | 0.338215 | 0.090132 | 0.217177 |
| IRF2BP2   | 0.047856 | 0.045697 | -0.06661 | 0.459013 |
| SLC38A9   | 0.221434 | 0.22262  | 0.007704 | 0.787084 |
| PYDC2     | 0.144218 | 0.143337 | -0.00883 | 0.726889 |
| RPS19BP1  | 0.296599 | 0.292403 | -0.02055 | 0.638109 |
| WRAP53    | 0.180584 | 0.177406 | -0.02562 | 0.484845 |
| LPA       | 0.287988 | 0.268486 | -0.10116 | 0.258776 |
| OSGIN1    | 0.406678 | 0.380183 | -0.09719 | 0.000184 |
| XRN1      | 0.168867 | 0.174557 | 0.047809 | 0.144311 |
| TREX1     | 0.323432 | 0.329817 | 0.028205 | 0.324661 |
| CAPN5     | 0.441367 | 0.437203 | -0.01368 | 0.626509 |
| C7orf44   | 0.199208 | 0.203749 | 0.03252  | 0.27584  |
| C17orf102 | 0.261636 | 0.251997 | -0.05415 | 0.419108 |
| ZNF638    | 0.161857 | 0.165503 | 0.032138 | 0.284133 |
| GCET2     | 0.529935 | 0.522785 | -0.0196  | 0.663259 |
| ABCD2     | 0.089049 | 0.081325 | -0.1309  | 0.582652 |
| LRRC37B   | 0.662294 | 0.664773 | 0.005391 | 0.595496 |
| LOC28579  | 0.257732 | 0.251732 | -0.03398 | 0.608472 |
| SP110     | 0.231052 | 0.209253 | -0.14297 | 0.068279 |
| MIR602    | 0.702876 | 0.691108 | -0.02436 | 0.303397 |
| MIR548C   | 0.430761 | 0.440614 | 0.032627 | 0.605216 |
| IL12B     | 0.296625 | 0.264964 | -0.16285 | 0.003399 |
| SLC16A7   | 0.599019 | 0.633552 | 0.080862 | 0.054736 |

|           |          |          |          |          |
|-----------|----------|----------|----------|----------|
| FAM13A    | 0.464042 | 0.486113 | 0.067037 | 0.17537  |
| LOC14474  | 0.067059 | 0.06078  | -0.14183 | 0.403205 |
| PPFIBP1   | 0.246987 | 0.242054 | -0.02911 | 0.518943 |
| FBXO18    | 0.640612 | 0.635683 | -0.01114 | 0.354071 |
| CABLES2   | 0.435069 | 0.426509 | -0.02867 | 0.088738 |
| C20orf123 | 0.487344 | 0.430524 | -0.17885 | 0.006865 |
| OR2A1     | 0.814241 | 0.872291 | 0.099354 | 0.371252 |
| SNRPE     | 0.131593 | 0.127372 | -0.04703 | 0.229569 |
| GPR55     | 0.765408 | 0.744065 | -0.0408  | 0.032745 |
| B3GNT1    | 0.184299 | 0.187204 | 0.022563 | 0.870525 |
| KCNA6     | 0.41974  | 0.41898  | -0.00261 | 0.914703 |
| AGAP8     | 0.675594 | 0.650781 | -0.05398 | 0.039557 |
| ZDHHC23   | 0.140714 | 0.144051 | 0.033812 | 0.146239 |
| SNORD115  | 0.443874 | 0.437682 | -0.02027 | 0.839469 |
| ATP8B3    | 0.227532 | 0.218846 | -0.05615 | 0.256818 |
| HDGFL1    | 0.854399 | 0.845045 | -0.01588 | 0.052423 |
| RUNX1     | 0.371837 | 0.359385 | -0.04914 | 0.223311 |
| LRRC41    | 0.217797 | 0.217978 | 0.001201 | 0.73916  |
| ZIC5      | 0.110107 | 0.105516 | -0.06144 | 0.330411 |
| SNAR.C1   | 0.571803 | 0.590518 | 0.046464 | 0.560494 |
| CCDC54    | 0.250419 | 0.274583 | 0.132898 | 0.140508 |
| SLC30A8   | 0.55813  | 0.53595  | -0.0585  | 0.581056 |
| CDR2      | 0.180805 | 0.176496 | -0.0348  | 0.33975  |
| LIN7C     | 0.172689 | 0.179901 | 0.05903  | 0.212869 |
| LOC37449  | 0.208981 | 0.212298 | 0.022718 | 0.603593 |
| NGDN      | 0.117087 | 0.119515 | 0.02961  | 0.094099 |
| TUB       | 0.334717 | 0.343184 | 0.036041 | 0.17463  |
| KIAA0319L | 0.450832 | 0.454782 | 0.012585 | 0.421795 |
| GOLGA5    | 0.051065 | 0.052299 | 0.034431 | 0.524992 |
| C19orf55  | 0.294767 | 0.295052 | 0.001394 | 0.877864 |
| ZNF501    | 0.188901 | 0.190537 | 0.012441 | 0.535676 |
| LOC34911  | 0.30927  | 0.311579 | 0.010731 | 0.399289 |
| RND2      | 0.201322 | 0.204425 | 0.022068 | 0.658197 |
| C9        | 0.08591  | 0.093594 | 0.12359  | 0.634785 |
| TSFM      | 0.175994 | 0.175395 | -0.00492 | 0.779928 |
| CCDC18    | 0.137028 | 0.139083 | 0.021473 | 0.467549 |
| SLC7A1    | 0.611567 | 0.606317 | -0.01244 | 0.377514 |
| ZNF664    | 0.290119 | 0.287066 | -0.01526 | 0.496565 |
| OTP       | 0.118281 | 0.108492 | -0.12462 | 0.068987 |
| ZDHHC3    | 0.438529 | 0.430259 | -0.02747 | 0.24528  |
| HEATR2    | 0.550396 | 0.546122 | -0.01125 | 0.386392 |
| GRK7      | 0.66296  | 0.670586 | 0.0165   | 0.329254 |
| RTP2      | 0.434112 | 0.422008 | -0.0408  | 0.434007 |
| TLR1      | 0.592373 | 0.618613 | 0.062533 | 0.453401 |
| POLR2I    | 0.091271 | 0.088334 | -0.0472  | 0.29046  |
| PIK3AP1   | 0.346631 | 0.350498 | 0.016006 | 0.732141 |
| NCRNA001  | 0.35867  | 0.363548 | 0.019489 | 0.876029 |
| GUF1      | 0.092801 | 0.090778 | -0.03179 | 0.231378 |
| TMEM147   | 0.057508 | 0.057809 | 0.007553 | 0.562053 |
| DND1      | 0.704339 | 0.712369 | 0.016355 | 0.111758 |
| SFTPC     | 0.603375 | 0.584939 | -0.04477 | 0.178356 |
| STAT5B    | 0.15832  | 0.157249 | -0.0098  | 0.64144  |
| GXYLT2    | 0.555835 | 0.559257 | 0.008856 | 0.885214 |
| CHRNA4    | 0.428937 | 0.449621 | 0.067944 | 0.351661 |
| RAB26     | 0.185225 | 0.170312 | -0.12109 | 0.02142  |
| SRCRB4D   | 0.407857 | 0.408371 | 0.001816 | 0.629816 |

|          |          |          |          |          |
|----------|----------|----------|----------|----------|
| IRF9     | 0.444996 | 0.445951 | 0.003095 | 0.779928 |
| L1CAM    | 0.360293 | 0.357579 | -0.01091 | 0.753264 |
| COG8     | 0.150625 | 0.151555 | 0.008879 | 0.648122 |
| GC       | 0.276602 | 0.297104 | 0.103155 | 0.311123 |
| ELMO1    | 0.316001 | 0.301132 | -0.06953 | 0.000478 |
| PPP2CA   | 0.116343 | 0.116989 | 0.007984 | 0.740918 |
| PRAGMIN  | 0.653942 | 0.641695 | -0.02728 | 0.067925 |
| CHN1     | 0.28759  | 0.289735 | 0.010717 | 0.826749 |
| CHST9    | 0.286297 | 0.274697 | -0.05967 | 0.206108 |
| SALL3    | 0.267983 | 0.281663 | 0.071829 | 0.262724 |
| MIR409   | 0.92592  | 0.914505 | -0.0179  | 0.26568  |
| NPY2R    | 0.286985 | 0.274532 | -0.064   | 0.412439 |
| CACYBP   | 0.118388 | 0.122987 | 0.054973 | 0.486303 |
| GF1B     | 0.276736 | 0.258985 | -0.09564 | 0.404518 |
| TACR2    | 0.353252 | 0.346399 | -0.02826 | 0.067927 |
| PIGU     | 0.248379 | 0.251926 | 0.020462 | 0.399289 |
| 8.Mar    | 0.367147 | 0.368494 | 0.005285 | 0.933197 |
| TBCC     | 0.079335 | 0.079819 | 0.008775 | 0.797849 |
| MBP      | 0.578218 | 0.581893 | 0.00914  | 0.552676 |
| PLA2G7   | 0.116591 | 0.119983 | 0.041372 | 0.502482 |
| NDST4    | 0.408193 | 0.402216 | -0.02128 | 0.429915 |
| ZNF189   | 0.29264  | 0.283373 | -0.04642 | 0.160999 |
| SLC7A4   | 0.301995 | 0.289733 | -0.0598  | 0.427196 |
| TRABD    | 0.4303   | 0.43861  | 0.027595 | 0.371258 |
| ANTXRL   | 0.473897 | 0.448181 | -0.08049 | 0.016895 |
| HSD3B1   | 0.230864 | 0.218491 | -0.07947 | 0.387671 |
| CNTD1    | 0.279832 | 0.280895 | 0.005469 | 0.712953 |
| IRAK2    | 0.264927 | 0.260876 | -0.02223 | 0.386392 |
| SMYD2    | 0.392226 | 0.398897 | 0.024331 | 0.526515 |
| PLK1S1   | 0.170561 | 0.171269 | 0.005979 | 0.659884 |
| RPL37A   | 0.183538 | 0.18739  | 0.029971 | 0.396689 |
| IL2      | 0.477876 | 0.553099 | 0.210901 | 0.09782  |
| TMEM170F | 0.125393 | 0.126242 | 0.009731 | 0.885214 |
| ZNF280C  | 0.351514 | 0.370158 | 0.07456  | 0.011075 |
| ACVRL1   | 0.49259  | 0.464894 | -0.08348 | 0.021953 |
| TRAPPC4  | 0.148336 | 0.148755 | 0.004072 | 0.776356 |
| LIMS1    | 0.369628 | 0.367467 | -0.00846 | 0.514426 |
| CSMD2    | 0.341161 | 0.328789 | -0.05329 | 0.122647 |
| ZNF281   | 0.219227 | 0.214666 | -0.03033 | 0.34093  |
| MAGEA5   | 0.622601 | 0.608348 | -0.03341 | 0.649796 |
| FSTL4    | 0.503631 | 0.49445  | -0.02654 | 0.091387 |
| HSPA9    | 0.258669 | 0.255689 | -0.01672 | 0.582655 |
| OR6Q1    | 0.175328 | 0.16099  | -0.12309 | 0.161697 |
| ZNF679   | 0.156576 | 0.167706 | 0.099066 | 0.256816 |
| SLC12A7  | 0.605956 | 0.621587 | 0.036744 | 0.279967 |
| RHBG     | 0.341169 | 0.365478 | 0.099298 | 0.283088 |
| C5orf33  | 0.164606 | 0.167997 | 0.029418 | 0.215444 |
| NMNAT1   | 0.208385 | 0.201965 | -0.04515 | 0.242453 |
| C1QL3    | 0.412617 | 0.432665 | 0.068449 | 0.14624  |
| SLC29A4  | 0.483606 | 0.485833 | 0.006628 | 0.569941 |
| ZFP106   | 0.38246  | 0.370289 | -0.04666 | 0.372506 |
| ELP2P    | 0.097659 | 0.104438 | 0.096833 | 0.032368 |
| KIRREL3  | 0.542054 | 0.524674 | -0.04702 | 0.015753 |
| LIN7A    | 0.3543   | 0.367721 | 0.053642 | 0.186761 |
| GREB1    | 0.638641 | 0.640791 | 0.004848 | 0.6101   |
| FGF3     | 0.187914 | 0.185195 | -0.02102 | 0.881538 |

|           |          |          |          |          |
|-----------|----------|----------|----------|----------|
| FAM161A   | 0.117002 | 0.118756 | 0.021468 | 0.148188 |
| PKD1L3    | 0.440422 | 0.453459 | 0.042086 | 0.295808 |
| RPL23     | 0.265447 | 0.254639 | -0.05997 | 0.084043 |
| C2orf80   | 0.51382  | 0.507785 | -0.01704 | 0.922096 |
| LOC10019  | 0.1354   | 0.155836 | 0.202798 | 0.010085 |
| ITM2A     | 0.276645 | 0.3088   | 0.158638 | 0.183672 |
| SNORD89   | 0.712201 | 0.721134 | 0.017983 | 0.401896 |
| ARL3      | 0.222497 | 0.227143 | 0.029811 | 0.600348 |
| IGF1      | 0.365656 | 0.356874 | -0.03507 | 0.699111 |
| DLGAP3    | 0.531926 | 0.520105 | -0.03242 | 0.350456 |
| ZNF559    | 0.197837 | 0.200839 | 0.021727 | 0.44226  |
| ATP10B    | 0.425518 | 0.468811 | 0.139787 | 0.173156 |
| C20orf117 | 0.427512 | 0.424044 | -0.01175 | 0.629816 |
| RAB27A    | 0.322167 | 0.318617 | -0.01599 | 0.470409 |
| SLC25A1   | 0.158653 | 0.155517 | -0.0288  | 0.46328  |
| IFI27L1   | 0.027771 | 0.026342 | -0.07623 | 0.377489 |
| PHKA1     | 0.189106 | 0.199487 | 0.077095 | 0.290462 |
| POU6F1    | 0.328152 | 0.324309 | -0.01699 | 0.442259 |
| CNRIP1    | 0.171631 | 0.16997  | -0.01403 | 0.636447 |
| KIF24     | 0.759967 | 0.75296  | -0.01336 | 0.029644 |
| CYB5A     | 0.16394  | 0.159705 | -0.03776 | 0.363831 |
| WNT3      | 0.446387 | 0.436533 | -0.03221 | 0.435376 |
| BCL10     | 0.299472 | 0.29694  | -0.01225 | 0.876029 |
| C8B       | 0.29625  | 0.28704  | -0.04556 | 0.464701 |
| APOL2     | 0.220934 | 0.233115 | 0.077426 | 0.230473 |
| TPH2      | 0.645472 | 0.667759 | 0.048972 | 0.12781  |
| GZMK      | 0.358716 | 0.385957 | 0.105598 | 0.376262 |
| EFNA5     | 0.394123 | 0.397229 | 0.011324 | 0.77101  |
| TSPAN9    | 0.502979 | 0.489361 | -0.0396  | 0.006536 |
| C1orf86   | 0.456789 | 0.447941 | -0.02822 | 0.125495 |
| SYF2      | 0.077447 | 0.081012 | 0.064932 | 0.166635 |
| SEMA3F    | 0.415733 | 0.413761 | -0.00686 | 0.732141 |
| RXRA      | 0.581911 | 0.56116  | -0.05239 | 0.000977 |
| PROP1     | 0.266134 | 0.243216 | -0.12991 | 0.385118 |
| FLJ22536  | 0.383172 | 0.391405 | 0.030668 | 0.167353 |
| NRP1      | 0.394593 | 0.399016 | 0.01608  | 0.36506  |
| CD14      | 0.322259 | 0.342842 | 0.089323 | 0.218047 |
| RPUSD3    | 0.035553 | 0.034744 | -0.03321 | 0.581043 |
| STEAP4    | 0.400967 | 0.439873 | 0.133605 | 0.212871 |
| PIN1      | 0.19606  | 0.191145 | -0.03663 | 0.352865 |
| OR4A47    | 0.090996 | 0.088402 | -0.04173 | 0.543373 |
| SRY       | 0.132834 | 0.126488 | -0.07062 | 0.358854 |
| LRRC36    | 0.509152 | 0.493756 | -0.0443  | 0.257794 |
| SYCE1     | 0.3271   | 0.344327 | 0.074048 | 0.176113 |
| PRM3      | 0.770745 | 0.734123 | -0.07023 | 0.004912 |
| INCENP    | 0.486607 | 0.484388 | -0.00659 | 0.700836 |
| GGPS1     | 0.219402 | 0.220512 | 0.007283 | 0.521964 |
| MIR149    | 0.301662 | 0.322942 | 0.098344 | 0.313353 |
| PDE4D     | 0.3172   | 0.330369 | 0.058688 | 0.029474 |
| HBA1      | 0.090866 | 0.092973 | 0.033073 | 0.232285 |
| BET1L     | 0.043202 | 0.044275 | 0.035368 | 0.321229 |
| FGFR2     | 0.649938 | 0.641649 | -0.01852 | 0.498041 |
| IPPK      | 0.420068 | 0.417788 | -0.00785 | 0.467549 |
| CSTA      | 0.409328 | 0.43675  | 0.093551 | 0.112288 |
| LSM5      | 0.146741 | 0.143169 | -0.03555 | 0.11602  |
| ZNF484    | 0.073674 | 0.081032 | 0.137334 | 0.022913 |

|           |          |          |          |          |
|-----------|----------|----------|----------|----------|
| SDR16C6   | 0.395543 | 0.404242 | 0.031382 | 0.74973  |
| H1FX      | 0.04031  | 0.040902 | 0.021039 | 0.250978 |
| RND1      | 0.228672 | 0.214655 | -0.09126 | 0.043756 |
| TMSB4Y    | 0.306108 | 0.285067 | -0.10274 | 0.421797 |
| LRIT2     | 0.3854   | 0.378463 | -0.0262  | 0.210315 |
| GPHA2     | 0.652847 | 0.642161 | -0.02381 | 0.52956  |
| LOC14457  | 0.129106 | 0.130297 | 0.013245 | 0.839468 |
| AFTPH     | 0.096965 | 0.097333 | 0.005475 | 0.654832 |
| LOC15738  | 0.30903  | 0.289021 | -0.09657 | 0.056522 |
| ABCG4     | 0.316025 | 0.308161 | -0.03636 | 0.276869 |
| AKR1C1    | 0.381193 | 0.386868 | 0.02132  | 0.235947 |
| LILRB4    | 0.141065 | 0.149599 | 0.084739 | 0.20032  |
| ACSL3     | 0.32351  | 0.330758 | 0.031965 | 0.138018 |
| FBXO44    | 0.451203 | 0.44169  | -0.03074 | 0.258774 |
| C17orf108 | 0.277267 | 0.265508 | -0.06252 | 0.180621 |
| GAK       | 0.697485 | 0.68919  | -0.01726 | 0.163798 |
| RBM44     | 0.916125 | 0.91289  | -0.0051  | 0.356443 |
| DOK3      | 0.656575 | 0.6529   | -0.0081  | 0.658198 |
| IDH2      | 0.196265 | 0.205406 | 0.065681 | 0.260745 |
| EID3      | 0.101492 | 0.127416 | 0.328184 | 0.071513 |
| C3orf39   | 0.431396 | 0.424473 | -0.02334 | 0.143671 |
| ZNF680    | 0.096007 | 0.090879 | -0.07919 | 0.506943 |
| MIR411    | 0.850492 | 0.841236 | -0.01579 | 0.376256 |
| PTCH1     | 0.289947 | 0.270874 | -0.09816 | 0.004003 |
| TIPARP    | 0.249301 | 0.252883 | 0.020582 | 0.251965 |
| HECTD2    | 0.063428 | 0.058906 | -0.10671 | 0.416428 |
| MUSTN1    | 0.492044 | 0.487976 | -0.01198 | 0.574693 |
| MRGPRX1   | 0.42724  | 0.483983 | 0.179909 | 0.003129 |
| MSGN1     | 0.698409 | 0.676751 | -0.04545 | 0.019888 |
| GSR       | 0.215508 | 0.222095 | 0.043437 | 0.092287 |
| GPR162    | 0.499769 | 0.51679  | 0.048317 | 0.073363 |
| NUDT22    | 0.139288 | 0.142205 | 0.029904 | 0.643105 |
| RUFY2     | 0.149559 | 0.154557 | 0.047425 | 0.345674 |
| GDPD1     | 0.11015  | 0.107159 | -0.03972 | 0.15148  |
| HCK       | 0.114618 | 0.103995 | -0.14032 | 0.063155 |
| OR4C16    | 0.13357  | 0.126582 | -0.07752 | 0.438122 |
| AP2A2     | 0.677049 | 0.673419 | -0.00776 | 0.540287 |
| RPL10     | 0.212095 | 0.22364  | 0.076468 | 0.67173  |
| OR4D2     | 0.197    | 0.191291 | -0.04243 | 0.470408 |
| TUBD1     | 0.195264 | 0.196401 | 0.008379 | 0.313352 |
| LRRC49    | 0.170134 | 0.171477 | 0.011343 | 0.343295 |
| DNAJC30   | 0.032678 | 0.033063 | 0.016873 | 0.08483  |
| IQCF2     | 0.361915 | 0.338468 | -0.09663 | 0.149499 |
| FLJ45445  | 0.614928 | 0.629184 | 0.033064 | 0.304495 |
| DSG1      | 0.435101 | 0.443834 | 0.028672 | 0.846754 |
| LOC28600  | 0.349123 | 0.364556 | 0.062404 | 0.160306 |
| NDUFS5    | 0.105808 | 0.108575 | 0.037234 | 0.242452 |
| C12orf65  | 0.15306  | 0.157796 | 0.043968 | 0.134344 |
| CCNO      | 0.070796 | 0.070134 | -0.01355 | 0.772786 |
| ZNF557    | 0.214269 | 0.219872 | 0.037241 | 0.241517 |
| PLCZ1     | 0.397668 | 0.414319 | 0.059176 | 0.054153 |
| ZNF576    | 0.121921 | 0.121109 | -0.00964 | 0.737401 |
| ZAN       | 0.126208 | 0.138971 | 0.138979 | 0.176114 |
| CST6      | 0.152905 | 0.159755 | 0.063228 | 0.195455 |
| ACO1      | 0.37121  | 0.359143 | -0.04768 | 0.044    |
| TRIM45    | 0.117939 | 0.118801 | 0.010503 | 0.447809 |

|           |          |          |          |          |
|-----------|----------|----------|----------|----------|
| ITGB1     | 0.326924 | 0.328008 | 0.004778 | 0.905473 |
| UQCRC2    | 0.053542 | 0.051876 | -0.04561 | 0.55423  |
| GCOM1     | 0.273548 | 0.264721 | -0.04733 | 0.028448 |
| SORBS2    | 0.471476 | 0.482327 | 0.032826 | 0.171689 |
| MIR1323   | 0.244809 | 0.242053 | -0.01633 | 0.413769 |
| IL31RA    | 0.289747 | 0.297752 | 0.03932  | 0.633128 |
| ZNF823    | 0.134648 | 0.13073  | -0.0426  | 0.446417 |
| LPO       | 0.303267 | 0.303182 | -0.00041 | 0.949872 |
| OAS3      | 0.329449 | 0.324756 | -0.0207  | 0.760348 |
| PKNOX2    | 0.421212 | 0.407845 | -0.04653 | 0.06449  |
| CCR10     | 0.260272 | 0.259925 | -0.00192 | 0.899941 |
| RRP1      | 0.32044  | 0.315865 | -0.02075 | 0.489223 |
| CCDC62    | 0.154138 | 0.168051 | 0.124678 | 0.065847 |
| PRKAA1    | 0.133356 | 0.134023 | 0.007197 | 0.413767 |
| RNF26     | 0.242685 | 0.235314 | -0.0445  | 0.2779   |
| TRIM44    | 0.360409 | 0.36446  | 0.016125 | 0.404517 |
| MEST      | 0.503741 | 0.493236 | -0.03041 | 0.452    |
| DAP       | 0.374764 | 0.368491 | -0.02435 | 0.343295 |
| COPG2     | 0.255583 | 0.266167 | 0.058542 | 0.058046 |
| PPP1R2P9  | 0.286591 | 0.281806 | -0.02429 | 0.735648 |
| HSP90AA1  | 0.26245  | 0.271467 | 0.048735 | 0.371259 |
| FAM128A   | 0.131387 | 0.136067 | 0.050491 | 0.102631 |
| ANXA3     | 0.180633 | 0.179228 | -0.01127 | 0.744438 |
| DIRC3     | 0.506798 | 0.496814 | -0.02871 | 0.032937 |
| TRIM71    | 0.431246 | 0.451215 | 0.065304 | 0.254869 |
| CDC42SE2  | 0.241237 | 0.243272 | 0.012116 | 0.438122 |
| PABPC3    | 0.325873 | 0.344708 | 0.081063 | 0.484846 |
| SF3A3     | 0.188139 | 0.185695 | -0.01886 | 0.439498 |
| SPINK8    | 0.598004 | 0.597131 | -0.00211 | 0.966569 |
| KIF11     | 0.065687 | 0.073874 | 0.169444 | 0.110712 |
| CRYL1     | 0.406297 | 0.419219 | 0.045172 | 0.366297 |
| LOC40163  | 0.28267  | 0.251307 | -0.16967 | 0.148169 |
| MAGEC2    | 0.559175 | 0.634693 | 0.182759 | 0.049932 |
| CACHD1    | 0.434396 | 0.437352 | 0.009786 | 0.95729  |
| C5orf47   | 0.736311 | 0.740578 | 0.008336 | 0.75503  |
| PPA2      | 0.075223 | 0.083933 | 0.158048 | 0.000609 |
| C14orf149 | 0.04259  | 0.043622 | 0.034525 | 0.044485 |
| SLC10A4   | 0.11991  | 0.115172 | -0.05817 | 0.231377 |
| CRTAM     | 0.431216 | 0.406174 | -0.08631 | 0.016896 |
| SNX24     | 0.244007 | 0.251866 | 0.04573  | 0.080754 |
| PDPR      | 0.285199 | 0.281937 | -0.0166  | 0.445031 |
| COMT      | 0.317647 | 0.32323  | 0.025135 | 0.320104 |
| SNORD9    | 0.855514 | 0.847655 | -0.01331 | 0.427191 |
| MORN3     | 0.486339 | 0.480241 | -0.0182  | 0.464701 |
| DDA1      | 0.143074 | 0.145689 | 0.026131 | 0.217176 |
| ZNF461    | 0.110406 | 0.111018 | 0.007976 | 0.608471 |
| PCSK2     | 0.232442 | 0.216991 | -0.09923 | 0.123781 |
| HHIPL2    | 0.540597 | 0.550569 | 0.026371 | 0.348058 |
| SETD1A    | 0.487587 | 0.486301 | -0.00381 | 0.678536 |
| GNG13     | 0.177702 | 0.176727 | -0.00794 | 0.52348  |
| KCTD20    | 0.703061 | 0.701655 | -0.00289 | 0.981423 |
| SH2D7     | 0.628259 | 0.629276 | 0.002335 | 0.769228 |
| GLI3      | 0.362108 | 0.339514 | -0.09295 | 0.224198 |
| RNF216    | 0.397996 | 0.396445 | -0.00563 | 0.718169 |
| KSR1      | 0.581892 | 0.574225 | -0.01913 | 0.257794 |
| ZNF467    | 0.283329 | 0.249111 | -0.18569 | 0.004568 |

|          |          |          |          |          |
|----------|----------|----------|----------|----------|
| ITM2B    | 0.140416 | 0.140729 | 0.00322  | 0.785294 |
| SPINK5L3 | 0.760426 | 0.765166 | 0.008965 | 0.351655 |
| RBM45    | 0.280758 | 0.282886 | 0.010894 | 0.633128 |
| CASP1    | 0.549236 | 0.565549 | 0.042226 | 0.128391 |
| C1orf203 | 0.35083  | 0.349203 | -0.00671 | 0.449202 |
| MATR3    | 0.202287 | 0.205116 | 0.020038 | 0.619924 |
| C4orf33  | 0.173997 | 0.164599 | -0.08011 | 0.10968  |
| CEBPE    | 0.633091 | 0.58154  | -0.12253 | 0.055621 |
| ASFMR1   | 0.197913 | 0.217886 | 0.138705 | 0.112815 |
| PCDHA1   | 0.485165 | 0.50267  | 0.051136 | 0.204443 |
| HSDL1    | 0.419344 | 0.421853 | 0.008608 | 0.515928 |
| ABHD4    | 0.225792 | 0.219203 | -0.04272 | 0.330412 |
| LYRM1    | 0.289299 | 0.292576 | 0.016251 | 0.500999 |
| ZNF423   | 0.489194 | 0.484514 | -0.01387 | 0.325804 |
| ILF2     | 0.070791 | 0.065812 | -0.10522 | 0.618278 |
| CTU1     | 0.420635 | 0.422901 | 0.00775  | 0.555798 |
| MIR573   | 0.441768 | 0.444264 | 0.008131 | 0.848579 |
| MFGE8    | 0.303362 | 0.295007 | -0.04029 | 0.167352 |
| SGTA     | 0.487797 | 0.484638 | -0.00937 | 0.670032 |
| MMP23B   | 0.256999 | 0.367526 | 0.516085 | 0.113877 |
| RANBP3   | 0.066962 | 0.067056 | 0.002023 | 0.872359 |
| PDZRN4   | 0.452425 | 0.4549   | 0.00787  | 0.988853 |
| PPP4R1   | 0.151171 | 0.150262 | -0.00871 | 0.973995 |
| OR2T12   | 0.282265 | 0.272291 | -0.0519  | 0.529561 |
| ARSA     | 0.154858 | 0.156961 | 0.01946  | 0.69051  |
| DGCR9    | 0.575157 | 0.567702 | -0.01882 | 0.728637 |
| SPOCK1   | 0.361223 | 0.358208 | -0.01209 | 0.571524 |
| C1orf113 | 0.358084 | 0.370127 | 0.047722 | 0.170962 |
| N4BP1    | 0.346878 | 0.351707 | 0.019947 | 0.401898 |
| EIF2C2   | 0.634714 | 0.625703 | -0.02063 | 0.096877 |
| CDYL2    | 0.43445  | 0.419554 | -0.05033 | 0.165215 |
| HOXC13   | 0.059011 | 0.059119 | 0.002637 | 0.824933 |
| HDDC2    | 0.324804 | 0.32402  | -0.00349 | 0.707752 |
| WNT10A   | 0.375782 | 0.361747 | -0.05492 | 0.165213 |
| CTXN1    | 0.089653 | 0.090829 | 0.018804 | 0.558925 |
| C16orf38 | 0.398497 | 0.431774 | 0.115706 | 0.080755 |
| FAM114A1 | 0.249726 | 0.254211 | 0.025683 | 0.560493 |
| HPS5     | 0.176691 | 0.180879 | 0.033797 | 0.283089 |
| SLC12A9  | 0.397972 | 0.403677 | 0.020536 | 0.352867 |
| SPRR2D   | 0.221015 | 0.20596  | -0.10178 | 0.139883 |
| ITSN1    | 0.195426 | 0.196518 | 0.008033 | 0.601969 |
| HMBS     | 0.23654  | 0.230521 | -0.03719 | 0.187539 |
| KRTAP5.5 | 0.809373 | 0.811393 | 0.003596 | 0.661568 |
| PLXNA4   | 0.58488  | 0.58108  | -0.0094  | 0.616642 |
| PTPRE    | 0.468803 | 0.460734 | -0.02505 | 0.832195 |
| MCM8     | 0.110659 | 0.109659 | -0.0131  | 0.557359 |
| UBA3     | 0.172677 | 0.159871 | -0.11117 | 0.064155 |
| C7orf4   | 0.308283 | 0.323253 | 0.068409 | 0.474715 |
| SNORA14F | 0.037456 | 0.038328 | 0.033205 | 0.104592 |
| MAGEA3   | 0.520872 | 0.500627 | -0.05719 | 0.204441 |
| OXTR     | 0.316191 | 0.33651  | 0.089855 | 0.408468 |
| TRIM25   | 0.096155 | 0.095477 | -0.01021 | 0.790669 |
| VSTM2L   | 0.328129 | 0.337584 | 0.040986 | 0.357713 |
| SIDT2    | 0.263805 | 0.259466 | -0.02392 | 0.443643 |
| C17orf28 | 0.249302 | 0.245393 | -0.0228  | 0.405832 |
| TECTB    | 0.509111 | 0.465473 | -0.12928 | 0.01722  |

|          |          |          |          |          |
|----------|----------|----------|----------|----------|
| EXTL2    | 0.68552  | 0.69429  | 0.01834  | 0.552676 |
| OR10G2   | 0.31771  | 0.295856 | -0.10281 | 0.122649 |
| CCDC153  | 0.503262 | 0.478835 | -0.07178 | 0.052431 |
| GABRQ    | 0.296195 | 0.299229 | 0.014703 | 0.951726 |
| TRH      | 0.158119 | 0.150547 | -0.07079 | 0.323517 |
| DTX3L    | 0.628065 | 0.645126 | 0.038668 | 0.313354 |
| KCNA4    | 0.209033 | 0.222634 | 0.090944 | 0.262725 |
| UPRT     | 0.182088 | 0.188405 | 0.0492   | 0.744439 |
| PLK3     | 0.249609 | 0.247184 | -0.01409 | 0.517435 |
| LOC54147 | 0.476553 | 0.494159 | 0.052337 | 0.565207 |
| C9orf96  | 0.167418 | 0.168109 | 0.005945 | 0.560494 |
| MIR1272  | 0.85591  | 0.847906 | -0.01355 | 0.037155 |
| CD164L2  | 0.275131 | 0.251962 | -0.12691 | 0.033515 |
| DUSP15   | 0.241814 | 0.246099 | 0.025338 | 0.189887 |
| NFKBIA   | 0.161993 | 0.165957 | 0.034875 | 0.537211 |
| PDE6A    | 0.458818 | 0.437214 | -0.06958 | 0.009883 |
| SH2D1B   | 0.435507 | 0.422089 | -0.04515 | 0.693947 |
| MIR495   | 0.726283 | 0.72097  | -0.01059 | 0.863198 |
| AASS     | 0.185155 | 0.202023 | 0.125784 | 0.120964 |
| SFRS4    | 0.242834 | 0.244374 | 0.009116 | 0.649796 |
| UNC5CL   | 0.334618 | 0.326928 | -0.03354 | 0.43264  |
| HDX      | 0.187804 | 0.193583 | 0.043721 | 0.983281 |
| SOX8     | 0.201509 | 0.175883 | -0.19623 | 0.025246 |
| HRNBP3   | 0.472215 | 0.422866 | -0.15924 | 0.000827 |
| TAGLN3   | 0.146542 | 0.148865 | 0.022694 | 0.644777 |
| RBM17    | 0.169211 | 0.17347  | 0.035856 | 0.489223 |
| tAKR     | 0.655771 | 0.623159 | -0.07359 | 0.411112 |
| TNK1     | 0.278814 | 0.276897 | -0.00995 | 0.63147  |
| RNU12    | 0.103292 | 0.096238 | -0.10204 | 0.435376 |
| SF4      | 0.559881 | 0.556259 | -0.00936 | 0.881538 |
| ZFATAS   | 0.283567 | 0.262363 | -0.11212 | 0.191468 |
| FLJ33360 | 0.854641 | 0.834558 | -0.03431 | 0.016364 |
| EPYC     | 0.702859 | 0.759078 | 0.111012 | 0.020263 |
| FAM165B  | 0.167091 | 0.164835 | -0.01961 | 0.172421 |
| ZNF497   | 0.272458 | 0.278287 | 0.030539 | 0.619925 |
| MYL2     | 0.74073  | 0.729917 | -0.02122 | 0.432635 |
| AMAC1L3  | 0.059003 | 0.060193 | 0.028786 | 0.670026 |
| VPS25    | 0.25893  | 0.260383 | 0.008077 | 0.70775  |
| STOML2   | 0.210616 | 0.217169 | 0.044206 | 0.235029 |
| C10orf55 | 0.134453 | 0.136217 | 0.018809 | 0.656512 |
| FBXO16   | 0.178807 | 0.179859 | 0.008458 | 0.537211 |
| SPEN     | 0.536382 | 0.539806 | 0.009178 | 0.537209 |
| MMP2     | 0.333345 | 0.317464 | -0.07042 | 0.259758 |
| LZTR1    | 0.258651 | 0.260279 | 0.009055 | 0.702563 |
| CABP2    | 0.541178 | 0.546995 | 0.015425 | 0.751496 |
| CYP17A1  | 0.311341 | 0.30496  | -0.02987 | 0.377518 |
| NIPAL4   | 0.13738  | 0.132772 | -0.04922 | 0.161696 |
| PXN      | 0.605951 | 0.597511 | -0.02024 | 0.082383 |
| PLEKHA7  | 0.436931 | 0.433537 | -0.01125 | 0.356496 |
| ZNF609   | 0.501962 | 0.505292 | 0.009541 | 0.457619 |
| MYOM3    | 0.21456  | 0.19637  | -0.12781 | 0.154832 |
| LOC10019 | 0.337089 | 0.360591 | 0.097232 | 0.935048 |
| ROMO1    | 0.04305  | 0.043518 | 0.015601 | 0.245255 |
| GRAP     | 0.817588 | 0.798406 | -0.03425 | 0.022634 |
| RNF19A   | 0.171949 | 0.176862 | 0.040639 | 0.330411 |
| ZNF681   | 0.200035 | 0.194485 | -0.04059 | 0.587458 |

|          |          |          |          |          |
|----------|----------|----------|----------|----------|
| C17orf91 | 0.138284 | 0.126657 | -0.12671 | 0.084461 |
| GRRP1    | 0.199214 | 0.194728 | -0.03286 | 0.288341 |
| PWWP2B   | 0.536112 | 0.527619 | -0.02304 | 0.247177 |
| SLC2A4RG | 0.483238 | 0.489597 | 0.018862 | 0.532615 |
| AKR7A3   | 0.369901 | 0.348906 | -0.0843  | 0.355285 |
| LOC15202 | 0.541828 | 0.574475 | 0.08441  | 0.023765 |
| GYPA     | 0.319619 | 0.343774 | 0.105107 | 0.324661 |
| TDRD1    | 0.585066 | 0.610081 | 0.060402 | 0.12321  |
| COX5B    | 0.15367  | 0.149028 | -0.04424 | 0.273795 |
| ZNF207   | 0.142982 | 0.145282 | 0.023023 | 0.237793 |
| SYCP2L   | 0.158912 | 0.154812 | -0.03772 | 0.623214 |
| GRAMD1C  | 0.218349 | 0.220591 | 0.014741 | 0.535677 |
| SLC25A44 | 0.204508 | 0.207103 | 0.018191 | 0.611735 |
| CCDC70   | 0.497463 | 0.483291 | -0.0417  | 0.031255 |
| KIAA1257 | 0.230643 | 0.221069 | -0.06117 | 0.101654 |
| EPHA4    | 0.361548 | 0.328939 | -0.13637 | 0.029648 |
| TANK     | 0.366079 | 0.380402 | 0.055371 | 0.305592 |
| LBP      | 0.567995 | 0.526557 | -0.10929 | 0.000423 |
| TUBB8    | 0.426253 | 0.425856 | -0.00134 | 0.9369   |
| TBXA2R   | 0.308328 | 0.31174  | 0.01588  | 0.964713 |
| LOC28583 | 0.162959 | 0.149961 | -0.11992 | 0.154831 |
| IRGC     | 0.32353  | 0.326707 | 0.014098 | 0.77101  |
| GLA      | 0.306001 | 0.314356 | 0.038867 | 0.543372 |
| ZNF619   | 0.16472  | 0.168774 | 0.03508  | 0.33623  |
| MIA2     | 0.790663 | 0.822892 | 0.05764  | 0.305589 |
| RBM43    | 0.249651 | 0.251892 | 0.012892 | 0.73916  |
| ASB2     | 0.522404 | 0.507139 | -0.04279 | 0.065506 |
| MMD      | 0.206022 | 0.209646 | 0.025162 | 0.554238 |
| ATP5E    | 0.094968 | 0.089735 | -0.08177 | 0.237794 |
| NSMCE1   | 0.224664 | 0.216821 | -0.05127 | 0.131939 |
| ATP5EP2  | 0.111064 | 0.124199 | 0.161268 | 0.090943 |
| MPHOSPH  | 0.103114 | 0.103012 | -0.00142 | 0.9369   |
| LINS1    | 0.126701 | 0.130419 | 0.041725 | 0.495093 |
| PRX      | 0.297881 | 0.286227 | -0.05758 | 0.135562 |
| ZACN     | 0.289435 | 0.285138 | -0.02158 | 0.449206 |
| CLCN5    | 0.337161 | 0.344521 | 0.031153 | 0.071879 |
| TSC1     | 0.315626 | 0.312641 | -0.01371 | 0.423142 |
| SEPX1    | 0.216206 | 0.211128 | -0.03429 | 0.151479 |
| ANAPC4   | 0.055701 | 0.056801 | 0.02822  | 0.865029 |
| ACOT4    | 0.052525 | 0.060672 | 0.208037 | 0.000747 |
| NIT1     | 0.061    | 0.058666 | -0.05627 | 0.351657 |
| PLAC8L1  | 0.718634 | 0.714975 | -0.00736 | 0.520451 |
| MACF1    | 0.481682 | 0.48707  | 0.01605  | 0.263716 |
| C16orf62 | 0.29684  | 0.296039 | -0.0039  | 0.920247 |
| TRPV1    | 0.621458 | 0.622601 | 0.00265  | 0.675129 |
| UBE2I    | 0.473658 | 0.471259 | -0.00733 | 0.688794 |
| GUCA2A   | 0.631815 | 0.619608 | -0.02815 | 0.219789 |
| GAB3     | 0.157992 | 0.16729  | 0.082499 | 0.772791 |
| REST     | 0.080823 | 0.078285 | -0.04604 | 0.964713 |
| KIAA0040 | 0.293765 | 0.276492 | -0.08743 | 0.058978 |
| UMPS     | 0.175142 | 0.175931 | 0.006488 | 0.973995 |
| C6orf57  | 0.068774 | 0.069134 | 0.007521 | 0.517428 |
| LOC33875 | 0.047647 | 0.047902 | 0.007706 | 0.922093 |
| PTAFR    | 0.609418 | 0.603499 | -0.01408 | 0.463277 |
| ZNF800   | 0.31807  | 0.319627 | 0.007045 | 0.985138 |
| FAM110C  | 0.211663 | 0.198578 | -0.09206 | 0.295808 |

|           |          |          |          |          |
|-----------|----------|----------|----------|----------|
| COX7C     | 0.13319  | 0.133447 | 0.002777 | 0.644775 |
| PTPLAD1   | 0.236279 | 0.2312   | -0.03135 | 0.368772 |
| OR6C74    | 0.231214 | 0.206839 | -0.16073 | 0.087008 |
| CCL14.CCI | 0.182127 | 0.158164 | -0.20352 | 0.153485 |
| JAG1      | 0.196662 | 0.190367 | -0.04693 | 0.170961 |
| AIF1L     | 0.35755  | 0.36047  | 0.011736 | 0.994427 |
| F11R      | 0.347438 | 0.329504 | -0.07646 | 0.308904 |
| CNKSRI    | 0.571694 | 0.567342 | -0.01102 | 0.883374 |
| TMTC2     | 0.319719 | 0.328502 | 0.039097 | 0.251965 |
| HJURP     | 0.350276 | 0.350332 | 0.000229 | 0.685368 |
| AKT1S1    | 0.226689 | 0.226858 | 0.00108  | 0.975852 |
| AAGAB     | 0.331283 | 0.330387 | -0.00391 | 0.912856 |
| SPNS2     | 0.407235 | 0.394544 | -0.04568 | 0.161    |
| C13orf39  | 0.631039 | 0.644552 | 0.030567 | 0.476154 |
| USP39     | 0.227054 | 0.227923 | 0.005513 | 0.839468 |
| SOSTDC1   | 0.328601 | 0.341897 | 0.057224 | 0.470409 |
| COG4      | 0.240326 | 0.233444 | -0.04192 | 0.528034 |
| SNRPA     | 0.318017 | 0.318319 | 0.001371 | 0.990711 |
| ATP5H     | 0.179229 | 0.180546 | 0.010564 | 0.33975  |
| LOC10010  | 0.929196 | 0.939141 | 0.01536  | 0.431173 |
| USP53     | 0.106271 | 0.105807 | -0.00631 | 0.483392 |
| MIR372    | 0.401068 | 0.423372 | 0.07808  | 0.254869 |
| LEP       | 0.506475 | 0.536246 | 0.082406 | 0.074114 |
| SNORD114  | 0.734225 | 0.788269 | 0.102466 | 0.005317 |
| DCUN1D3   | 0.319933 | 0.324943 | 0.022417 | 0.358931 |
| TRIM39    | 0.491504 | 0.490011 | -0.00439 | 0.912856 |
| PTGR1     | 0.15352  | 0.155945 | 0.022607 | 0.253898 |
| CUGBP1    | 0.411641 | 0.409218 | -0.00852 | 0.742677 |
| TMBIM4    | 0.190672 | 0.195451 | 0.035715 | 0.218917 |
| PEX14     | 0.550524 | 0.558035 | 0.01955  | 0.348056 |
| MGST1     | 0.307225 | 0.341064 | 0.150746 | 0.146888 |
| SNORA19   | 0.743608 | 0.786929 | 0.081691 | 0.419106 |
| CLVS2     | 0.162944 | 0.170338 | 0.064027 | 0.096879 |
| NEB       | 0.525689 | 0.526854 | 0.003194 | 0.876029 |
| FBXO33    | 0.068602 | 0.069286 | 0.014323 | 0.877864 |
| C16orf7   | 0.416954 | 0.406232 | -0.03758 | 0.043999 |
| TMCO5A    | 0.452196 | 0.451709 | -0.00156 | 0.756803 |
| CLCN7     | 0.530885 | 0.526479 | -0.01203 | 0.388947 |
| BOLA2     | 0.064482 | 0.068802 | 0.09356  | 0.013669 |
| SNX29     | 0.56086  | 0.556737 | -0.01064 | 0.394093 |
| CDC123    | 0.131468 | 0.132746 | 0.013953 | 0.699112 |
| C1orf101  | 0.292671 | 0.288801 | -0.01921 | 0.300132 |
| FANCE     | 0.348571 | 0.327534 | -0.08981 | 0.003944 |
| GMPPB     | 0.143705 | 0.145282 | 0.01575  | 0.498041 |
| OR2B6     | 0.432547 | 0.419421 | -0.04446 | 0.489223 |
| SIGLEC14  | 0.218471 | 0.212276 | -0.0415  | 0.55268  |
| MAP4      | 0.379436 | 0.381106 | 0.006335 | 0.524997 |
| EFNA4     | 0.152468 | 0.161753 | 0.085286 | 0.449205 |
| MGC42105  | 0.318791 | 0.312735 | -0.02767 | 0.114942 |
| COL29A1   | 0.425836 | 0.394238 | -0.11123 | 0.043031 |
| CDX4      | 0.157503 | 0.147114 | -0.09844 | 0.67513  |
| HS3ST3B1  | 0.19864  | 0.207049 | 0.059816 | 0.409789 |
| PLVAP     | 0.287577 | 0.307729 | 0.097711 | 0.416435 |
| LOC28635  | 0.47436  | 0.471571 | -0.00851 | 0.824935 |
| MSL2      | 0.125377 | 0.127584 | 0.025171 | 0.313351 |
| HIST1H2BI | 0.148333 | 0.159818 | 0.107583 | 0.619924 |

|           |          |          |          |          |
|-----------|----------|----------|----------|----------|
| ASF1B     | 0.080742 | 0.081949 | 0.021401 | 0.626509 |
| TNF       | 0.574965 | 0.568987 | -0.01508 | 0.852229 |
| CRIP2     | 0.322966 | 0.31212  | -0.04928 | 0.404518 |
| KCTD14    | 0.5925   | 0.586077 | -0.01572 | 0.67683  |
| LOC72908  | 0.420244 | 0.420166 | -0.00027 | 0.927644 |
| ZNF148    | 0.203382 | 0.210933 | 0.05259  | 0.264712 |
| USP31     | 0.568839 | 0.57251  | 0.009282 | 0.648122 |
| NOC3L     | 0.102686 | 0.099888 | -0.03986 | 0.549568 |
| MLH1      | 0.143104 | 0.144809 | 0.017093 | 0.592273 |
| NEK5      | 0.184448 | 0.188978 | 0.035005 | 0.272777 |
| COPS5     | 0.124961 | 0.117897 | -0.08395 | 0.344482 |
| CCDC106   | 0.178576 | 0.183834 | 0.041862 | 0.407147 |
| MAGED2    | 0.261835 | 0.268812 | 0.037936 | 0.361376 |
| ARF5      | 0.194865 | 0.197497 | 0.019353 | 0.473277 |
| EGFR      | 0.483745 | 0.498031 | 0.041987 | 0.611734 |
| RRAGD     | 0.273131 | 0.265691 | -0.03985 | 0.283088 |
| MAST1     | 0.514715 | 0.521963 | 0.020175 | 0.24528  |
| ANGEL1    | 0.195386 | 0.197966 | 0.018919 | 0.349258 |
| MOBK2B    | 0.390686 | 0.384668 | -0.0224  | 0.450601 |
| COX17     | 0.067478 | 0.073687 | 0.126999 | 0.986996 |
| C6orf218  | 0.064592 | 0.057547 | -0.16662 | 0.106108 |
| XYLT2     | 0.252013 | 0.247824 | -0.02418 | 0.07006  |
| MC1R      | 0.35443  | 0.362154 | 0.031102 | 0.471842 |
| YIPF5     | 0.110665 | 0.108393 | -0.02992 | 0.735647 |
| RPL18A    | 0.927505 | 0.933295 | 0.008978 | 0.301758 |
| RPS6KA6   | 0.134131 | 0.157867 | 0.235064 | 0.29046  |
| NUDT16P   | 0.474682 | 0.540888 | 0.188369 | 0.015854 |
| RMND5A    | 0.129559 | 0.130244 | 0.007603 | 0.938752 |
| ZNF536    | 0.638498 | 0.629554 | -0.02035 | 0.149498 |
| SLC16A12  | 0.328704 | 0.339372 | 0.04608  | 0.113345 |
| CATSPER3  | 0.656514 | 0.649109 | -0.01637 | 0.144307 |
| NBPF10    | 0.318517 | 0.322586 | 0.018312 | 0.918398 |
| NFIX      | 0.291017 | 0.264584 | -0.13738 | 0.122649 |
| CPLX2     | 0.285805 | 0.286691 | 0.004462 | 0.656513 |
| HEBP2     | 0.127359 | 0.132217 | 0.054013 | 0.211164 |
| RPA3      | 0.208426 | 0.217387 | 0.060734 | 0.160305 |
| OSCP1     | 0.112008 | 0.114431 | 0.030874 | 0.1891   |
| LAMA1     | 0.337181 | 0.332711 | -0.01926 | 0.624862 |
| KRT16     | 0.731733 | 0.689675 | -0.0854  | 0.004122 |
| TBC1D3B   | 0.210139 | 0.201809 | -0.05835 | 0.124923 |
| CDC42BPC  | 0.499665 | 0.484865 | -0.04338 | 0.038673 |
| SNORD22   | 0.534278 | 0.483232 | -0.14488 | 0.023765 |
| LOC91149  | 0.293629 | 0.299442 | 0.028279 | 0.299046 |
| ZNF841    | 0.061771 | 0.059273 | -0.05956 | 0.311119 |
| ADH6      | 0.754591 | 0.781609 | 0.050753 | 0.078752 |
| LOC73081  | 0.711326 | 0.78094  | 0.1347   | 0.056221 |
| C10orf129 | 0.723974 | 0.732284 | 0.016465 | 0.45903  |
| LRG1      | 0.304036 | 0.307924 | 0.018329 | 0.796055 |
| MYH16     | 0.395962 | 0.384687 | -0.04168 | 0.233199 |
| PARP15    | 0.282522 | 0.300509 | 0.089046 | 0.446419 |
| TBC1D10C  | 0.55285  | 0.513866 | -0.1055  | 0.039782 |
| HOOK2     | 0.235555 | 0.249814 | 0.084788 | 0.181379 |
| CDK10     | 0.559049 | 0.55427  | -0.01238 | 0.299046 |
| C5orf60   | 0.594734 | 0.57912  | -0.03838 | 0.268723 |
| SLC25A40  | 0.104153 | 0.107432 | 0.044726 | 0.273795 |
| SNCA      | 0.14886  | 0.151696 | 0.027231 | 0.663259 |

|           |          |          |          |          |
|-----------|----------|----------|----------|----------|
| DHRS4L1   | 0.129384 | 0.131868 | 0.027438 | 0.505455 |
| PSMG1     | 0.096353 | 0.09775  | 0.020769 | 0.429912 |
| PAX8      | 0.402233 | 0.399934 | -0.00827 | 0.774574 |
| ATP11B    | 0.176841 | 0.174225 | -0.0215  | 0.60035  |
| NHSL1     | 0.389642 | 0.386654 | -0.0111  | 0.933197 |
| HABP2     | 0.525162 | 0.511905 | -0.03689 | 0.683657 |
| SMURF2    | 0.351059 | 0.352966 | 0.007816 | 0.876029 |
| CNR2      | 0.279971 | 0.256259 | -0.12767 | 0.013494 |
| NDC80     | 0.056554 | 0.056579 | 0.000626 | 0.44502  |
| TRPM8     | 0.575289 | 0.551498 | -0.06093 | 0.029128 |
| PSMB8     | 0.276296 | 0.27815  | 0.00965  | 0.890733 |
| GATSL2    | 0.079771 | 0.081313 | 0.027617 | 0.535675 |
| HERC2P2   | 0.359381 | 0.356957 | -0.00976 | 0.624861 |
| PARD6G    | 0.232669 | 0.240497 | 0.047739 | 0.038021 |
| FAM129B   | 0.581223 | 0.58478  | 0.008803 | 0.31447  |
| KIF12     | 0.330972 | 0.312771 | -0.0816  | 0.214586 |
| LOC28541  | 0.433236 | 0.474036 | 0.129843 | 0.052148 |
| HOXB13    | 0.080056 | 0.080047 | -0.00017 | 0.931345 |
| C10orf96  | 0.77907  | 0.774123 | -0.00919 | 0.912855 |
| IRAK1     | 0.330251 | 0.334596 | 0.018857 | 0.953581 |
| ZNF138    | 0.060841 | 0.062313 | 0.034473 | 0.17986  |
| KIDINS220 | 0.300962 | 0.303515 | 0.012183 | 0.585854 |
| GNB1      | 0.388797 | 0.398183 | 0.034415 | 0.154831 |
| SLC15A4   | 0.512819 | 0.513245 | 0.001196 | 0.810462 |
| TMEM91    | 0.115162 | 0.118627 | 0.042771 | 0.198688 |
| LRRC32    | 0.330611 | 0.312989 | -0.07903 | 0.065165 |
| SNORD30   | 0.201061 | 0.172006 | -0.22517 | 0.023478 |
| GSTK1     | 0.099853 | 0.101904 | 0.029333 | 0.396684 |
| CCDC36    | 0.279886 | 0.278451 | -0.00741 | 0.855882 |
| BANF2     | 0.219521 | 0.228799 | 0.059722 | 0.461862 |
| LDHA      | 0.158177 | 0.142082 | -0.15482 | 0.124918 |
| KIF25     | 0.488526 | 0.484138 | -0.01302 | 0.649796 |
| MIR518E   | 0.237108 | 0.238103 | 0.006041 | 0.890732 |
| SIGLEC7   | 0.263928 | 0.263074 | -0.00468 | 0.846756 |
| SNORD115  | 0.228965 | 0.218761 | -0.06577 | 0.454805 |
| MBTD1     | 0.237585 | 0.234803 | -0.01699 | 0.316717 |
| RS1       | 0.593807 | 0.616271 | 0.053571 | 0.180618 |
| PRDX2     | 0.103178 | 0.104805 | 0.022576 | 0.434003 |
| SERINC3   | 0.212382 | 0.210802 | -0.01077 | 0.935048 |
| LOC10013  | 0.454545 | 0.47083  | 0.050782 | 0.27687  |
| IL20RA    | 0.404244 | 0.420964 | 0.058473 | 0.215447 |
| ZFHx3     | 0.501303 | 0.510602 | 0.026517 | 0.345673 |
| LOC55420  | 0.126051 | 0.11146  | -0.17748 | 0.134952 |
| C2orf48   | 0.465421 | 0.454971 | -0.03276 | 0.18214  |
| FSTL5     | 0.229326 | 0.233959 | 0.028852 | 0.352865 |
| VEGFC     | 0.29572  | 0.319587 | 0.111976 | 0.106109 |
| C14orf64  | 0.400839 | 0.333201 | -0.26663 | 0.006582 |
| LOC65339  | 0.840389 | 0.853658 | 0.022601 | 0.413761 |
| C2orf68   | 0.215902 | 0.215574 | -0.0022  | 0.920247 |
| LRPAP1    | 0.646308 | 0.639733 | -0.01475 | 0.18367  |
| C12orf57  | 0.072991 | 0.071822 | -0.02329 | 0.896255 |
| C22orf28  | 0.329605 | 0.31834  | -0.05017 | 0.093192 |
| CNTNAP4   | 0.376595 | 0.375611 | -0.00377 | 0.562062 |
| GNG5      | 0.032257 | 0.032689 | 0.01921  | 0.90547  |
| PPP1R1B   | 0.367894 | 0.337563 | -0.12413 | 0.09688  |
| MCM6      | 0.188169 | 0.189976 | 0.013792 | 0.477597 |

|           |          |          |          |          |
|-----------|----------|----------|----------|----------|
| SLC35A1   | 0.190612 | 0.193321 | 0.020362 | 0.555799 |
| HYAL1     | 0.459749 | 0.46838  | 0.026831 | 0.193852 |
| GJC3      | 0.450112 | 0.451826 | 0.005482 | 0.972138 |
| DEFB116   | 0.188702 | 0.173378 | -0.12219 | 0.193055 |
| EVL       | 0.604576 | 0.606467 | 0.004506 | 0.896256 |
| BCL7C     | 0.038424 | 0.038127 | -0.01119 | 0.8431   |
| OR52I1    | 0.412197 | 0.439393 | 0.092178 | 0.225087 |
| ZNF774    | 0.284703 | 0.277329 | -0.03786 | 0.241516 |
| PAFAH1B3  | 0.196837 | 0.200486 | 0.026497 | 0.514425 |
| MDK       | 0.17143  | 0.167193 | -0.0361  | 0.508432 |
| ZNF804A   | 0.133921 | 0.131733 | -0.02377 | 0.767451 |
| VEPH1     | 0.401464 | 0.390447 | -0.04014 | 0.312237 |
| MOCS2     | 0.045347 | 0.041906 | -0.11386 | 0.079931 |
| MIR551B   | 0.650947 | 0.735935 | 0.177038 | 0.024199 |
| TMEM99    | 0.505038 | 0.51321  | 0.023155 | 0.4506   |
| VPS4A     | 0.44413  | 0.441383 | -0.00895 | 0.636446 |
| PASK      | 0.493607 | 0.489593 | -0.01178 | 0.649796 |
| CEBPG     | 0.252643 | 0.256196 | 0.020149 | 0.512925 |
| PRPH2     | 0.713812 | 0.7033   | -0.0214  | 0.431275 |
| ACAP3     | 0.553272 | 0.549513 | -0.00984 | 0.489224 |
| HIBADH    | 0.348957 | 0.341137 | -0.0327  | 0.133741 |
| ING5      | 0.54513  | 0.544187 | -0.0025  | 0.959146 |
| MATN3     | 0.187282 | 0.182189 | -0.03978 | 0.302309 |
| OIT3      | 0.516718 | 0.523506 | 0.018831 | 0.049932 |
| MOCOS     | 0.432677 | 0.425807 | -0.02309 | 0.744439 |
| DKFZp779l | 0.09395  | 0.089399 | -0.07163 | 0.103615 |
| PIP4K2C   | 0.078614 | 0.081436 | 0.05088  | 0.165212 |
| HDC       | 0.554814 | 0.542043 | -0.0336  | 0.39539  |
| KRT78     | 0.501056 | 0.459415 | -0.12517 | 0.098292 |
| ZNF254    | 0.263396 | 0.257412 | -0.03316 | 0.511425 |
| C1orf168  | 0.744697 | 0.721352 | -0.04595 | 0.003502 |
| PGAM2     | 0.306616 | 0.29739  | -0.04408 | 0.268725 |
| STK4      | 0.110992 | 0.10662  | -0.05798 | 0.308902 |
| OR6W1P    | 0.201681 | 0.21436  | 0.087967 | 0.18444  |
| MFSD3     | 0.126137 | 0.130009 | 0.043622 | 0.396688 |
| OBFC2B    | 0.205377 | 0.207831 | 0.017137 | 0.240583 |
| C1QTNF4   | 0.455321 | 0.463106 | 0.024459 | 0.479042 |
| C3orf63   | 0.391474 | 0.397775 | 0.023035 | 0.63147  |
| PLCB3     | 0.582262 | 0.581944 | -0.00079 | 0.890732 |
| TMEM38A   | 0.124839 | 0.122463 | -0.02772 | 0.411112 |
| EFNA1     | 0.26231  | 0.256496 | -0.03234 | 0.228665 |
| RTBDN     | 0.175436 | 0.171046 | -0.03656 | 0.616643 |
| CCNE2     | 0.13127  | 0.129252 | -0.02235 | 0.723398 |
| ZNF238    | 0.435517 | 0.435806 | 0.000956 | 0.920247 |
| ANGEL2    | 0.257269 | 0.257722 | 0.002538 | 0.79067  |
| SIAH1     | 0.157085 | 0.17103  | 0.122697 | 0.052429 |
| IPO4      | 0.103418 | 0.103955 | 0.007463 | 0.629814 |
| MIR125A   | 0.383404 | 0.386374 | 0.011131 | 0.946164 |
| LGALS9C   | 0.38817  | 0.365386 | -0.08727 | 0.161697 |
| USP49     | 0.446139 | 0.44911  | 0.009576 | 0.601969 |
| RPL17     | 0.482402 | 0.473443 | -0.02705 | 0.184439 |
| ZFP2      | 0.225281 | 0.217399 | -0.05138 | 0.091837 |
| CCDC152   | 0.367408 | 0.367931 | 0.002052 | 0.854056 |
| ZNF583    | 0.047906 | 0.049008 | 0.032802 | 0.253887 |
| CD244     | 0.232452 | 0.233755 | 0.00806  | 0.814076 |
| NCRNA00:  | 0.411068 | 0.456454 | 0.151095 | 0.062498 |

|          |          |          |          |          |
|----------|----------|----------|----------|----------|
| DYNLL2   | 0.200802 | 0.204324 | 0.025085 | 0.470407 |
| DLD      | 0.208809 | 0.211742 | 0.020127 | 0.395392 |
| HCG4     | 0.117151 | 0.103771 | -0.17496 | 0.218044 |
| DHX57    | 0.170471 | 0.157374 | -0.11533 | 0.061522 |
| KCNB1    | 0.406007 | 0.479107 | 0.238842 | 0.00975  |
| SLC6A9   | 0.465856 | 0.458197 | -0.02392 | 0.138017 |
| SARS     | 0.299944 | 0.301791 | 0.008856 | 0.854055 |
| PALM3    | 0.324212 | 0.297619 | -0.12347 | 0.000869 |
| RASSF3   | 0.359463 | 0.351473 | -0.03243 | 0.170235 |
| MIR2116  | 0.916204 | 0.91203  | -0.00659 | 0.164452 |
| CTSK     | 0.757233 | 0.781684 | 0.045848 | 0.022359 |
| SYP      | 0.132462 | 0.14233  | 0.10366  | 0.235028 |
| HES2     | 0.213798 | 0.189609 | -0.17322 | 0.030712 |
| RPL13AP2 | 0.540579 | 0.53785  | -0.0073  | 0.405832 |
| MFSD2B   | 0.258625 | 0.268776 | 0.055539 | 0.10263  |
| DAO      | 0.394873 | 0.366954 | -0.10579 | 0.008337 |
| ICA1     | 0.191755 | 0.189336 | -0.01831 | 0.400592 |
| PYCARD   | 0.336497 | 0.364563 | 0.115576 | 0.194654 |
| RPLP2    | 0.209419 | 0.204107 | -0.03707 | 0.431274 |
| ACSS2    | 0.258003 | 0.250236 | -0.0441  | 0.226872 |
| CMYA5    | 0.424092 | 0.426342 | 0.007633 | 0.806855 |
| ATXN7L1  | 0.519835 | 0.51661  | -0.00898 | 0.623214 |
| KEAP1    | 0.327701 | 0.324632 | -0.01357 | 0.450601 |
| SLC19A2  | 0.152298 | 0.150533 | -0.01682 | 0.36506  |
| ITGB2    | 0.385287 | 0.403465 | 0.066513 | 0.380042 |
| TEAD2    | 0.209072 | 0.204732 | -0.03027 | 0.608472 |
| FAM159B  | 0.117465 | 0.131975 | 0.168036 | 0.014585 |
| ARHGAP12 | 0.190868 | 0.191231 | 0.002746 | 0.628161 |
| PMS2L1   | 0.3945   | 0.396073 | 0.005738 | 0.852229 |
| ARL5A    | 0.158629 | 0.16095  | 0.020954 | 0.343295 |
| SYT5     | 0.279381 | 0.263825 | -0.08265 | 0.303401 |
| SERF2    | 0.29853  | 0.304389 | 0.028041 | 0.103122 |
| DSG2     | 0.163561 | 0.168977 | 0.046994 | 0.623215 |
| GSTM2    | 0.135603 | 0.135189 | -0.00441 | 0.446419 |
| FOXJ1    | 0.258068 | 0.253079 | -0.02816 | 0.697388 |
| CKAP2    | 0.100713 | 0.101855 | 0.016271 | 0.372504 |
| MIR659   | 0.312865 | 0.347188 | 0.150174 | 0.021819 |
| CCDC85B  | 0.079682 | 0.075271 | -0.08217 | 0.08362  |
| U2AF2    | 0.301666 | 0.29371  | -0.03856 | 0.447811 |
| DAXX     | 0.330294 | 0.318398 | -0.05292 | 0.352867 |
| PTPRR    | 0.39496  | 0.428617 | 0.117983 | 0.000907 |
| CAPN9    | 0.534714 | 0.527    | -0.02097 | 0.229565 |
| SLC30A3  | 0.162399 | 0.162654 | 0.002258 | 0.693945 |
| PCNA     | 0.085972 | 0.087415 | 0.024014 | 0.678535 |
| MPPED1   | 0.566161 | 0.534014 | -0.08433 | 0.002968 |
| NUCKS1   | 0.34486  | 0.338379 | -0.02737 | 0.311123 |
| MORC4    | 0.215445 | 0.228834 | 0.086982 | 0.126649 |
| CYLC2    | 0.827715 | 0.859665 | 0.05464  | 0.425836 |
| AJAP1    | 0.549103 | 0.537266 | -0.03144 | 0.363829 |
| MYEOV    | 0.573357 | 0.55664  | -0.04269 | 0.022497 |
| HLTF     | 0.580784 | 0.582371 | 0.003936 | 0.814074 |
| CREB3L3  | 0.153297 | 0.139505 | -0.13602 | 0.030712 |
| PHC2     | 0.340591 | 0.342787 | 0.009274 | 0.420451 |
| FAM176B  | 0.381695 | 0.395795 | 0.052332 | 0.428554 |
| P11      | 0.704433 | 0.680976 | -0.04886 | 0.002587 |
| CARD18   | 0.785934 | 0.807314 | 0.038721 | 0.760345 |

|            |          |          |          |          |
|------------|----------|----------|----------|----------|
| CCDC125    | 0.507871 | 0.514937 | 0.019934 | 0.373755 |
| SNORD115   | 0.585199 | 0.595918 | 0.026187 | 0.799649 |
| RPS4X      | 0.27067  | 0.264771 | -0.03179 | 0.295806 |
| HBII.52.45 | 0.393707 | 0.34508  | -0.19019 | 0.026487 |
| CHRNA3     | 0.264918 | 0.268455 | 0.01913  | 0.397986 |
| LOC73127   | 0.568871 | 0.553312 | -0.04001 | 0.191467 |
| HSPC159    | 0.289662 | 0.291044 | 0.006867 | 0.95729  |
| SURF2      | 0.25478  | 0.267028 | 0.067739 | 0.07188  |
| OR2AT4     | 0.369249 | 0.35561  | -0.0543  | 0.279967 |
| C22orf43   | 0.606114 | 0.602467 | -0.00871 | 0.639773 |
| FMN1       | 0.503229 | 0.507881 | 0.013276 | 0.541829 |
| CCDC43     | 0.07701  | 0.079716 | 0.049824 | 0.172419 |
| KCNN3      | 0.481338 | 0.463543 | -0.05435 | 0.016161 |
| HOXB9      | 0.118539 | 0.11782  | -0.00877 | 0.857711 |
| VWA5B2     | 0.356909 | 0.3568   | -0.00044 | 0.68708  |
| ANKRD37    | 0.064342 | 0.068089 | 0.081663 | 0.200319 |
| LOC100131  | 0.399948 | 0.308702 | -0.3736  | 0.006047 |
| GTPBP3     | 0.178133 | 0.174238 | -0.0319  | 0.149498 |
| RPGRIP1    | 0.178307 | 0.180237 | 0.015531 | 0.649797 |
| SMARCAD    | 0.089318 | 0.079706 | -0.16426 | 0.355279 |
| FMO5       | 0.320026 | 0.318572 | -0.00657 | 0.920247 |
| C7orf25    | 0.114938 | 0.117113 | 0.027039 | 0.257794 |
| AQP5       | 0.435915 | 0.412272 | -0.08045 | 0.117107 |
| TUBGCP3    | 0.496053 | 0.498338 | 0.00663  | 0.697387 |
| MYCBP      | 0.172371 | 0.16888  | -0.02952 | 0.201137 |
| PURB       | 0.082902 | 0.082758 | -0.00251 | 0.663256 |
| CYP27A1    | 0.189786 | 0.192726 | 0.022181 | 0.446419 |
| NDUFA12    | 0.214654 | 0.212847 | -0.0122  | 0.506944 |
| PLA2G4D    | 0.445559 | 0.416761 | -0.0964  | 0.051308 |
| SOX3       | 0.131461 | 0.157423 | 0.260018 | 0.108137 |
| CUL2       | 0.133621 | 0.135755 | 0.022856 | 0.363831 |
| KCNC2      | 0.221269 | 0.212625 | -0.05749 | 0.460445 |
| EMR2       | 0.125795 | 0.128717 | 0.033128 | 0.600347 |
| FNBP1      | 0.443787 | 0.444478 | 0.003223 | 0.95729  |
| CBX3       | 0.113177 | 0.109693 | -0.04511 | 0.382571 |
| TMEM178    | 0.329995 | 0.313015 | -0.07622 | 0.003249 |
| POU5F1B    | 0.665986 | 0.657882 | -0.01766 | 0.670029 |
| HNRNPH3    | 0.152387 | 0.156059 | 0.034354 | 0.344482 |
| KIF13B     | 0.494016 | 0.490183 | -0.01124 | 0.610101 |
| FBXL13     | 0.390958 | 0.383718 | -0.02697 | 0.557362 |
| ATXN1L     | 0.240545 | 0.240587 | 0.000252 | 0.961001 |
| ZNF844     | 0.181913 | 0.184173 | 0.017813 | 0.638109 |
| TNFSF12.T  | 0.557363 | 0.471356 | -0.2418  | 0.00905  |
| C2orf55    | 0.349315 | 0.346334 | -0.01237 | 0.443642 |
| PHTF2      | 0.196094 | 0.199798 | 0.026997 | 0.397986 |
| CCL20      | 0.777597 | 0.785091 | 0.013838 | 0.925794 |
| GNAT3      | 0.802505 | 0.819157 | 0.029629 | 0.331564 |
| C2orf72    | 0.368209 | 0.350007 | -0.07314 | 0.149501 |
| SEZ6       | 0.381404 | 0.367538 | -0.05343 | 0.156867 |
| CYP1B1     | 0.162661 | 0.176083 | 0.114384 | 0.068632 |
| PTOV1      | 0.353423 | 0.355873 | 0.009968 | 0.492151 |
| ALDOC      | 0.24956  | 0.269713 | 0.112043 | 0.639774 |
| VCPIP1     | 0.114001 | 0.110973 | -0.03883 | 0.26173  |
| LOC100131  | 0.341626 | 0.369075 | 0.111496 | 0.247179 |
| PRC1       | 0.257061 | 0.253343 | -0.02102 | 0.318973 |
| TOR1AIP2   | 0.062299 | 0.05234  | -0.25128 | 0.02811  |

|           |          |          |          |          |
|-----------|----------|----------|----------|----------|
| RSL1D1    | 0.117319 | 0.112087 | -0.06582 | 0.111239 |
| SH3D20    | 0.259305 | 0.23783  | -0.12472 | 0.315594 |
| SERPINA7  | 0.346183 | 0.330751 | -0.06579 | 0.191468 |
| ULK2      | 0.339296 | 0.343748 | 0.018809 | 0.467549 |
| NR1H4     | 0.428257 | 0.430764 | 0.008421 | 0.728639 |
| CLDND2    | 0.295991 | 0.301084 | 0.024611 | 0.742678 |
| KRTAP5.11 | 0.235367 | 0.229819 | -0.03442 | 0.558927 |
| ATP1B2    | 0.195595 | 0.197663 | 0.015178 | 0.861368 |
| C9orf171  | 0.451639 | 0.428716 | -0.07515 | 0.028447 |
| TMEM107   | 0.112702 | 0.115885 | 0.040187 | 0.257794 |
| TAS2R31   | 0.154314 | 0.159472 | 0.04744  | 0.387671 |
| NCOR2     | 0.592156 | 0.585519 | -0.01626 | 0.305592 |
| FABP5     | 0.196468 | 0.213877 | 0.122482 | 0.176859 |
| FAM153A   | 0.711487 | 0.691241 | -0.04165 | 0.412434 |
| LILRA2    | 0.159826 | 0.145626 | -0.13423 | 0.052148 |
| PSMF1     | 0.194    | 0.19557  | 0.011628 | 0.73916  |
| DECR2     | 0.325825 | 0.336475 | 0.046399 | 0.141766 |
| SLC17A5   | 0.124321 | 0.135798 | 0.127397 | 0.026172 |
| MIR520B   | 0.27988  | 0.26427  | -0.08279 | 0.147537 |
| HAL       | 0.769391 | 0.76123  | -0.01538 | 0.216306 |
| PRSS27    | 0.498209 | 0.488861 | -0.02733 | 0.225977 |
| USP6NL    | 0.610858 | 0.620516 | 0.022632 | 0.093188 |
| FAM177B   | 0.335047 | 0.334155 | -0.00385 | 0.618284 |
| STAG3L4   | 0.043006 | 0.042513 | -0.01662 | 0.506926 |
| GTF3C5    | 0.184267 | 0.18963  | 0.041391 | 0.221546 |
| TNFRSF10I | 0.481875 | 0.420656 | -0.19602 | 0.005056 |
| LPAR3     | 0.388665 | 0.390974 | 0.008545 | 0.751495 |
| PER1      | 0.341879 | 0.336353 | -0.02351 | 0.481939 |
| C1orf228  | 0.487705 | 0.474128 | -0.04073 | 0.047016 |
| SNHG5     | 0.083787 | 0.08107  | -0.04757 | 0.585849 |
| TMED6     | 0.484015 | 0.49044  | 0.019026 | 0.616644 |
| C11orf20  | 0.142084 | 0.141759 | -0.0033  | 0.170962 |
| SFN       | 0.809351 | 0.807128 | -0.00397 | 0.397982 |
| ARSH      | 0.646825 | 0.644951 | -0.00419 | 0.894414 |
| ANK2      | 0.500656 | 0.504433 | 0.010844 | 0.613367 |
| FSTL3     | 0.307174 | 0.30309  | -0.01931 | 0.613369 |
| LZTS1     | 0.600474 | 0.605023 | 0.010888 | 0.540287 |
| TRIM6     | 0.147948 | 0.164584 | 0.153732 | 0.16879  |
| KRTAP24.1 | 0.376381 | 0.36916  | -0.02795 | 0.66326  |
| GRID2IP   | 0.321259 | 0.322684 | 0.006385 | 0.985138 |
| SLC6A16   | 0.398493 | 0.417767 | 0.068145 | 0.312237 |
| RPA1      | 0.527493 | 0.523235 | -0.01169 | 0.616641 |
| FAM150A   | 0.125317 | 0.125503 | 0.002137 | 0.486303 |
| TM2D3     | 0.1214   | 0.130566 | 0.105014 | 0.060877 |
| ZKSCAN2   | 0.186689 | 0.184663 | -0.01575 | 0.314471 |
| SRD5A1P1  | 0.628951 | 0.654927 | 0.058387 | 0.081976 |
| SH3RF2    | 0.567263 | 0.558056 | -0.02361 | 0.968425 |
| PUM1      | 0.37811  | 0.376796 | -0.00502 | 0.774573 |
| ZBPB      | 0.418913 | 0.407682 | -0.03921 | 0.397987 |
| ANKRD30E  | 0.166115 | 0.186632 | 0.168017 | 0.025398 |
| UROC1     | 0.457209 | 0.448215 | -0.02866 | 0.20114  |
| MDM1      | 0.21422  | 0.212757 | -0.00989 | 0.87236  |
| KCTD16    | 0.405575 | 0.410605 | 0.017783 | 0.67173  |
| RPTN      | 0.287743 | 0.264676 | -0.12055 | 0.028787 |
| TKT       | 0.27149  | 0.271327 | -0.00087 | 0.990711 |
| OR6P1     | 0.112628 | 0.101603 | -0.14862 | 0.118748 |

|           |          |          |          |          |
|-----------|----------|----------|----------|----------|
| INTS7     | 0.096689 | 0.097047 | 0.005332 | 0.454801 |
| PRH1      | 0.269844 | 0.258178 | -0.06376 | 0.177606 |
| CRYBA2    | 0.369437 | 0.353335 | -0.06429 | 0.562064 |
| NACA2     | 0.568066 | 0.581614 | 0.034003 | 0.159611 |
| FARSB     | 0.095396 | 0.092474 | -0.04488 | 0.235947 |
| AMHR2     | 0.610977 | 0.599168 | -0.02816 | 0.132534 |
| PMS2CL    | 0.656927 | 0.658581 | 0.003628 | 0.67683  |
| SCAMP1    | 0.11865  | 0.124699 | 0.071738 | 0.368772 |
| FBXO21    | 0.3819   | 0.379171 | -0.01035 | 0.512922 |
| C10orf111 | 0.084295 | 0.083767 | -0.00907 | 0.9369   |
| DLX4      | 0.13618  | 0.126562 | -0.10567 | 0.419111 |
| HORMAD2   | 0.513482 | 0.503274 | -0.02897 | 0.959146 |
| PTCD1     | 0.676125 | 0.676766 | 0.001365 | 0.593885 |
| SH3BGR    | 0.30935  | 0.300104 | -0.04378 | 0.109162 |
| C11orf74  | 0.395904 | 0.405734 | 0.035386 | 0.234113 |
| ANKRD36E  | 0.884403 | 0.900774 | 0.026461 | 0.264699 |
| FRG1      | 0.221137 | 0.232231 | 0.070617 | 0.058047 |
| FOXA2     | 0.088728 | 0.095448 | 0.10533  | 0.345668 |
| SAPS2     | 0.549852 | 0.547292 | -0.00673 | 0.7374   |
| ELAC2     | 0.292255 | 0.293533 | 0.006295 | 0.577869 |
| IFITM3    | 0.200138 | 0.209041 | 0.062789 | 0.094103 |
| FAM101A   | 0.508914 | 0.496503 | -0.03562 | 0.009426 |
| NUPL2     | 0.082287 | 0.085612 | 0.057144 | 0.218045 |
| SF3A1     | 0.135686 | 0.138685 | 0.031541 | 0.314471 |
| CHMP7     | 0.163851 | 0.165702 | 0.01621  | 0.317843 |
| ABTB2     | 0.375253 | 0.36462  | -0.04147 | 0.060237 |
| GGT6      | 0.640287 | 0.611016 | -0.06751 | 0.087436 |
| TPP2      | 0.198337 | 0.204985 | 0.047563 | 0.454805 |
| OR6X1     | 0.561053 | 0.557114 | -0.01016 | 0.916551 |
| FBXO28    | 0.050083 | 0.047565 | -0.07442 | 0.50098  |
| CUEDC2    | 0.200477 | 0.201441 | 0.006925 | 0.443643 |
| TRPC4     | 0.138462 | 0.143671 | 0.053283 | 0.199504 |
| FAM86A    | 0.250708 | 0.245973 | -0.02751 | 0.363831 |
| VCX2      | 0.279056 | 0.281198 | 0.011033 | 0.565209 |
| TEX10     | 0.304228 | 0.297488 | -0.03232 | 0.225085 |
| ADK       | 0.176654 | 0.172809 | -0.03175 | 0.373751 |
| ERCC6L    | 0.137911 | 0.140338 | 0.025166 | 0.416434 |
| EPOR      | 0.224561 | 0.216892 | -0.05013 | 0.100202 |
| HERV.FR.D | 0.320115 | 0.332534 | 0.054911 | 0.195455 |
| TRAK1     | 0.65173  | 0.65076  | -0.00215 | 0.477593 |
| SLC17A1   | 0.443991 | 0.446709 | 0.008805 | 0.654832 |
| OBFC1     | 0.198069 | 0.202919 | 0.034902 | 0.19226  |
| ANKRD6    | 0.507365 | 0.510699 | 0.00945  | 0.4534   |
| AGR2      | 0.710763 | 0.746458 | 0.070694 | 0.70429  |
| VGLL2     | 0.085561 | 0.088974 | 0.056439 | 0.173154 |
| SPATA9    | 0.736992 | 0.738814 | 0.003562 | 0.955435 |
| RBM28     | 0.339875 | 0.327475 | -0.05362 | 0.039782 |
| TSPY4     | 0.545993 | 0.521748 | -0.06553 | 0.747965 |
| PMPCB     | 0.06786  | 0.073064 | 0.106595 | 0.022497 |
| MLLT1     | 0.471538 | 0.466216 | -0.01638 | 0.3374   |
| OR10H4    | 0.09943  | 0.095164 | -0.06326 | 0.69051  |
| ZNF225    | 0.09654  | 0.094088 | -0.03712 | 0.951726 |
| BLK       | 0.400055 | 0.386358 | -0.05026 | 0.212871 |
| MIR132    | 0.036483 | 0.035542 | -0.03771 | 0.33504  |
| STUB1     | 0.215762 | 0.215271 | -0.00329 | 0.663259 |
| ZNF407    | 0.691029 | 0.689497 | -0.0032  | 0.584251 |

|          |          |          |          |          |
|----------|----------|----------|----------|----------|
| COX16    | 0.077356 | 0.075669 | -0.03181 | 0.742676 |
| ST7      | 0.292114 | 0.294545 | 0.011959 | 0.396688 |
| NAA11    | 0.557485 | 0.64799  | 0.217041 | 0.000535 |
| ALOX12P2 | 0.167075 | 0.162953 | -0.03604 | 0.304496 |
| PAX2     | 0.115231 | 0.110424 | -0.06147 | 0.213724 |
| C12orf77 | 0.683014 | 0.689945 | 0.014566 | 0.299046 |
| RARRES3  | 0.404121 | 0.449998 | 0.155131 | 0.068279 |
| TTLL11   | 0.325915 | 0.318018 | -0.03539 | 0.05992  |
| SIK3     | 0.412112 | 0.417141 | 0.017499 | 0.39152  |
| POPDC2   | 0.474809 | 0.485187 | 0.031193 | 0.351661 |
| MIR206   | 0.551422 | 0.647576 | 0.231894 | 0.005591 |
| NOVA1    | 0.148235 | 0.149386 | 0.011156 | 0.222428 |
| OR8U1    | 0.466052 | 0.534457 | 0.197581 | 0.082798 |
| MIDN     | 0.373976 | 0.37764  | 0.014066 | 0.879701 |
| C6orf167 | 0.068749 | 0.062532 | -0.13674 | 0.239643 |
| PDP1     | 0.219023 | 0.224528 | 0.035813 | 0.246225 |
| C1orf109 | 0.197336 | 0.199106 | 0.012879 | 0.544917 |
| POLG     | 0.187624 | 0.190031 | 0.018384 | 0.697388 |
| CEP72    | 0.562408 | 0.556231 | -0.01593 | 0.158922 |
| TOP2A    | 0.092852 | 0.093897 | 0.016142 | 0.633125 |
| CX3CR1   | 0.458366 | 0.44752  | -0.03455 | 0.305594 |
| SPANXN2  | 0.442789 | 0.477224 | 0.108046 | 0.194654 |
| CNOT3    | 0.254046 | 0.254309 | 0.001497 | 0.830379 |
| ZNF84    | 0.129136 | 0.130631 | 0.0166   | 0.796054 |
| DYNC2H1  | 0.076621 | 0.078863 | 0.041613 | 0.595498 |
| FBXL2    | 0.183462 | 0.178369 | -0.04062 | 0.189885 |
| CDC25A   | 0.221909 | 0.217915 | -0.0262  | 0.377517 |
| HYOU1    | 0.113383 | 0.112665 | -0.00918 | 0.489223 |
| BEAN     | 0.382854 | 0.354265 | -0.11197 | 0.000892 |
| CUL5     | 0.282989 | 0.288597 | 0.028312 | 0.373753 |
| DPYSL4   | 0.40796  | 0.408523 | 0.001988 | 0.949872 |
| SETD2    | 0.427825 | 0.429971 | 0.007221 | 0.66326  |
| UGT2B15  | 0.074436 | 0.084092 | 0.17597  | 0.211165 |
| SEMA3G   | 0.517145 | 0.510302 | -0.01922 | 0.372506 |
| SDAD1    | 0.202141 | 0.193027 | -0.06657 | 0.095021 |
| TRIM74   | 0.451152 | 0.453598 | 0.0078   | 0.737403 |
| TCTA     | 0.102405 | 0.104048 | 0.022962 | 0.693945 |
| FLJ12825 | 0.528    | 0.539778 | 0.031829 | 0.28834  |
| HDAC10   | 0.077883 | 0.081235 | 0.0608   | 0.280993 |
| CKS1B    | 0.110278 | 0.110913 | 0.008282 | 0.693946 |
| DPM2     | 0.257466 | 0.26311  | 0.031281 | 0.459032 |
| OTUD6B   | 0.164779 | 0.16597  | 0.010382 | 0.474714 |
| KPRP     | 0.283578 | 0.288829 | 0.02647  | 0.901785 |
| FCRLB    | 0.14731  | 0.13853  | -0.08865 | 0.143035 |
| RDH13    | 0.152542 | 0.154644 | 0.019742 | 0.453402 |
| ASL      | 0.274463 | 0.270159 | -0.0228  | 0.352865 |
| SCGN     | 0.102945 | 0.099046 | -0.0557  | 0.304493 |
| SLC38A6  | 0.258546 | 0.266977 | 0.046295 | 0.348059 |
| MLL2     | 0.643101 | 0.639207 | -0.00876 | 0.560492 |
| HSPD1    | 0.09667  | 0.095597 | -0.0161  | 0.563634 |
| SSX1     | 0.467271 | 0.449718 | -0.05524 | 0.538748 |
| ATP6V1C2 | 0.422462 | 0.421015 | -0.00495 | 0.616644 |
| ABR      | 0.399155 | 0.412369 | 0.046987 | 0.449206 |
| C6orf165 | 0.262878 | 0.255032 | -0.04371 | 0.209468 |
| MIR525   | 0.358376 | 0.33799  | -0.08449 | 0.188321 |
| PDE3A    | 0.353083 | 0.359438 | 0.025734 | 0.157549 |

|          |          |          |          |          |
|----------|----------|----------|----------|----------|
| ZNF195   | 0.238822 | 0.229592 | -0.05687 | 0.150818 |
| MIR568   | 0.884181 | 0.904964 | 0.033519 | 0.081551 |
| SATB2    | 0.2666   | 0.283079 | 0.086527 | 0.394099 |
| RNF20    | 0.46352  | 0.44902  | -0.04585 | 0.074492 |
| CDKN1B   | 0.136603 | 0.128174 | -0.09188 | 0.166637 |
| MRPL40   | 0.508504 | 0.499707 | -0.02518 | 0.301218 |
| PGAP1    | 0.218249 | 0.227273 | 0.058446 | 0.328103 |
| PTK2B    | 0.501131 | 0.48541  | -0.04598 | 0.197065 |
| C17orf73 | 0.487073 | 0.472496 | -0.04384 | 0.137399 |
| FAM76B   | 0.123119 | 0.127271 | 0.047849 | 0.320106 |
| AADAT    | 0.042069 | 0.042524 | 0.015513 | 0.373732 |
| REG1A    | 0.757896 | 0.748409 | -0.01817 | 0.184434 |
| MRP63    | 0.049452 | 0.049879 | 0.012397 | 0.6565   |
| TMEM97   | 0.082708 | 0.080999 | -0.03013 | 0.639773 |
| MIR197   | 0.590383 | 0.609857 | 0.04682  | 0.279967 |
| UCRC     | 0.101483 | 0.101757 | 0.003892 | 0.404516 |
| KISS1    | 0.541765 | 0.5072   | -0.09511 | 0.055623 |
| SLC22A2  | 0.334434 | 0.338198 | 0.01615  | 0.868693 |
| AP1G2    | 0.200766 | 0.198329 | -0.01762 | 0.735648 |
| ACO2     | 0.196403 | 0.191674 | -0.03516 | 0.333893 |
| GEMIN7   | 0.263078 | 0.265886 | 0.015315 | 0.476153 |
| ARL15    | 0.421517 | 0.439599 | 0.060597 | 0.036118 |
| ZDHHC9   | 0.174356 | 0.186586 | 0.097808 | 0.260745 |
| FAM161B  | 0.307713 | 0.302771 | -0.02336 | 0.439499 |
| GDF11    | 0.276689 | 0.282483 | 0.029899 | 0.357714 |
| ZNRF3    | 0.431893 | 0.407673 | -0.08326 | 0.003082 |
| WDR45L   | 0.456111 | 0.457496 | 0.004376 | 0.762121 |
| ATP13A2  | 0.330794 | 0.330596 | -0.00087 | 0.983281 |
| QSER1    | 0.205467 | 0.208911 | 0.02398  | 0.354073 |
| PSME3    | 0.232309 | 0.233002 | 0.0043   | 0.440878 |
| OR4C15   | 0.336741 | 0.363979 | 0.112216 | 0.489224 |
| CACNG4   | 0.347981 | 0.349641 | 0.006864 | 0.518941 |
| C6orf41  | 0.205904 | 0.229418 | 0.156002 | 0.083211 |
| WWP2     | 0.582938 | 0.582158 | -0.00193 | 0.933196 |
| MIR129.1 | 0.80919  | 0.782993 | -0.04748 | 0.001765 |
| THOP1    | 0.561552 | 0.555487 | -0.01567 | 0.200317 |
| SEC14L4  | 0.391365 | 0.349984 | -0.16122 | 0.113877 |
| DCN      | 0.433188 | 0.469951 | 0.117518 | 0.039113 |
| COMP     | 0.120094 | 0.115765 | -0.05297 | 0.524995 |
| ADSSL1   | 0.555993 | 0.547185 | -0.02304 | 0.161697 |
| ECD      | 0.045266 | 0.04328  | -0.06473 | 0.866857 |
| TACSTD2  | 0.396774 | 0.418784 | 0.077888 | 0.543373 |
| C16orf73 | 0.156476 | 0.151243 | -0.04907 | 0.306695 |
| FAM26E   | 0.390174 | 0.412274 | 0.079485 | 0.110718 |
| C7       | 0.610787 | 0.655232 | 0.101337 | 0.123213 |
| THG1L    | 0.190934 | 0.191911 | 0.007363 | 0.870526 |
| CLDN8    | 0.619448 | 0.664729 | 0.101784 | 0.233198 |
| OR5M8    | 0.294653 | 0.300946 | 0.030486 | 0.712954 |
| ENTPD1   | 0.268661 | 0.280238 | 0.060865 | 0.382575 |
| TMCO7    | 0.312371 | 0.312722 | 0.00162  | 0.707751 |
| SORBS1   | 0.465293 | 0.467791 | 0.007723 | 0.367533 |
| C14orf70 | 0.574323 | 0.567779 | -0.01653 | 0.225977 |
| SSTR4    | 0.21346  | 0.220539 | 0.047069 | 0.405833 |
| HYALP1   | 0.735471 | 0.732652 | -0.00554 | 0.787084 |
| MINA     | 0.371681 | 0.364842 | -0.02679 | 0.449205 |
| MIR1914  | 0.899677 | 0.902374 | 0.004319 | 0.940595 |

|          |          |          |          |          |
|----------|----------|----------|----------|----------|
| LANCL1   | 0.137736 | 0.132948 | -0.05105 | 0.676831 |
| LACE1    | 0.239645 | 0.241986 | 0.014023 | 0.629814 |
| SF3B3    | 0.416188 | 0.405162 | -0.03874 | 0.239651 |
| C13orf37 | 0.046542 | 0.045843 | -0.02185 | 0.95729  |
| C1orf97  | 0.10789  | 0.105022 | -0.03887 | 0.460444 |
| HMGCLL1  | 0.165208 | 0.175547 | 0.087578 | 0.1638   |
| C9orf129 | 0.450356 | 0.432851 | -0.0572  | 0.119853 |
| GCAT     | 0.08959  | 0.0922   | 0.041436 | 0.23228  |
| LRR1Q4   | 0.642781 | 0.722394 | 0.168458 | 0.002199 |
| SBF2     | 0.363809 | 0.366315 | 0.009905 | 0.506944 |
| TMEM132f | 0.298615 | 0.283745 | -0.07369 | 0.087008 |
| USP20    | 0.543807 | 0.531568 | -0.03284 | 0.048587 |
| PHAX     | 0.202935 | 0.211805 | 0.061718 | 0.065166 |
| RAB11B   | 0.36694  | 0.362199 | -0.01876 | 0.535677 |
| SHB      | 0.484716 | 0.478543 | -0.01849 | 0.308904 |
| LOC72933 | 0.076318 | 0.067726 | -0.17232 | 0.249083 |
| DGKZ     | 0.404927 | 0.390047 | -0.05401 | 0.019041 |
| BTNL8    | 0.290308 | 0.298886 | 0.042014 | 0.315593 |
| DDI2     | 0.174493 | 0.175743 | 0.010295 | 0.460446 |
| RFESD    | 0.316821 | 0.32762  | 0.048355 | 0.257795 |
| KCNN2    | 0.232004 | 0.235177 | 0.019596 | 0.251963 |
| CCDC110  | 0.117021 | 0.113057 | -0.04972 | 0.392808 |
| STK36    | 0.268046 | 0.264493 | -0.01925 | 0.514426 |
| CLCA2    | 0.675852 | 0.680756 | 0.010431 | 0.992569 |
| C9orf50  | 0.494196 | 0.484327 | -0.0291  | 0.051307 |
| ASB15    | 0.624881 | 0.654493 | 0.066796 | 0.251001 |
| POP7     | 0.091129 | 0.088059 | -0.04944 | 0.412438 |
| FAM3C    | 0.155273 | 0.156734 | 0.013514 | 0.386391 |
| DARS2    | 0.431026 | 0.435882 | 0.016162 | 0.787084 |
| VENTXP7  | 0.578731 | 0.58909  | 0.025594 | 0.192258 |
| GNS      | 0.211224 | 0.213692 | 0.016761 | 0.338574 |
| CXCR6    | 0.676817 | 0.66608  | -0.02307 | 0.067227 |
| MAPK15   | 0.255139 | 0.266574 | 0.063253 | 0.313352 |
| FOXK1    | 0.667379 | 0.673705 | 0.013611 | 0.42991  |
| TEX261   | 0.120806 | 0.12108  | 0.003274 | 0.634785 |
| MIR103.1 | 0.552911 | 0.570292 | 0.044653 | 0.100683 |
| GATA1    | 0.653065 | 0.642583 | -0.02334 | 0.699109 |
| FLJ45244 | 0.144158 | 0.145706 | 0.015411 | 0.445028 |
| OSBPL2   | 0.400185 | 0.40471  | 0.016223 | 0.385116 |
| MRS2     | 0.219564 | 0.222433 | 0.01873  | 0.778142 |
| A4GALT   | 0.401832 | 0.381119 | -0.07635 | 0.024495 |
| PPP2R4   | 0.465608 | 0.464757 | -0.00264 | 0.866861 |
| SYMPK    | 0.298734 | 0.343815 | 0.20277  | 0.024348 |
| SPRR1B   | 0.278745 | 0.275017 | -0.01942 | 0.517435 |
| CYorf15A | 0.102529 | 0.103435 | 0.01269  | 0.697379 |
| FAM167B  | 0.356565 | 0.295847 | -0.26931 | 0.013061 |
| C19orf43 | 0.166874 | 0.168706 | 0.015753 | 0.532613 |
| RPS11    | 0.16045  | 0.142882 | -0.1673  | 0.041845 |
| TCEAL5   | 0.316627 | 0.31246  | -0.01911 | 0.970282 |
| APBA2    | 0.648158 | 0.645202 | -0.00659 | 0.520448 |
| KIAA0020 | 0.29771  | 0.296744 | -0.00469 | 0.687082 |
| CCBE1    | 0.215504 | 0.206517 | -0.06146 | 0.695667 |
| C1orf83  | 0.137098 | 0.139755 | 0.027692 | 0.237795 |
| ZBTB2    | 0.46328  | 0.467803 | 0.014016 | 0.408467 |
| UBA5     | 0.080674 | 0.078354 | -0.04211 | 0.560491 |
| AK1      | 0.101801 | 0.104475 | 0.037416 | 0.243393 |

|           |          |          |          |          |
|-----------|----------|----------|----------|----------|
| AHSP      | 0.201567 | 0.194478 | -0.05165 | 0.452001 |
| FAM190B   | 0.259187 | 0.26359  | 0.024306 | 0.387671 |
| WEE1      | 0.133815 | 0.132796 | -0.01102 | 0.837647 |
| ART5      | 0.168657 | 0.16704  | -0.0139  | 0.391519 |
| BSDC1     | 0.115994 | 0.116044 | 0.00062  | 0.823122 |
| MIR124.3  | 0.065421 | 0.065594 | 0.003826 | 0.894413 |
| TSSK4     | 0.692848 | 0.703186 | 0.021368 | 0.189102 |
| HMX3      | 0.063511 | 0.066795 | 0.072735 | 0.124919 |
| C9orf140  | 0.189617 | 0.183865 | -0.04444 | 0.086579 |
| CRYM      | 0.091588 | 0.087014 | -0.0739  | 0.281002 |
| AMPD3     | 0.360448 | 0.342406 | -0.07408 | 0.081159 |
| RAET1L    | 0.212513 | 0.174743 | -0.28231 | 0.499519 |
| RPS10     | 0.202721 | 0.200931 | -0.0128  | 0.700835 |
| C7orf57   | 0.156883 | 0.157489 | 0.005559 | 0.899941 |
| RGL1      | 0.362104 | 0.355772 | -0.02545 | 0.390233 |
| PPP1R15A  | 0.159338 | 0.164492 | 0.045931 | 0.201141 |
| OSBPL11   | 0.215026 | 0.21624  | 0.00812  | 0.576278 |
| ZBTB3     | 0.075303 | 0.078557 | 0.061032 | 0.177605 |
| APOL1     | 0.408732 | 0.40263  | -0.0217  | 0.558927 |
| UBE2T     | 0.051281 | 0.047945 | -0.09706 | 0.357704 |
| SERPINB3  | 0.499161 | 0.504515 | 0.015391 | 0.543373 |
| CXCL3     | 0.100285 | 0.099338 | -0.01369 | 0.651472 |
| SOAT2     | 0.577112 | 0.555676 | -0.05461 | 0.24813  |
| ZNF382    | 0.051916 | 0.052963 | 0.028824 | 0.299032 |
| RSC1A1    | 0.86252  | 0.875074 | 0.020847 | 0.450589 |
| AIMP2     | 0.513017 | 0.508558 | -0.01259 | 0.626511 |
| TTLL7     | 0.267984 | 0.275833 | 0.041649 | 0.069701 |
| TAL2      | 0.502011 | 0.49641  | -0.01619 | 0.460445 |
| TRPC7     | 0.602296 | 0.591093 | -0.02709 | 0.443645 |
| SPON2     | 0.184568 | 0.171546 | -0.10556 | 0.189888 |
| CHAF1A    | 0.184292 | 0.178826 | -0.04343 | 0.108137 |
| C12orf70  | 0.297039 | 0.297383 | 0.001669 | 0.852229 |
| SH3BGRL3  | 0.137985 | 0.152639 | 0.145609 | 0.167352 |
| FZD5      | 0.334853 | 0.341385 | 0.027874 | 0.26571  |
| POLE      | 0.715369 | 0.7105   | -0.00985 | 0.365058 |
| STARD5    | 0.164097 | 0.16267  | -0.0126  | 0.859539 |
| MED8      | 0.193286 | 0.197665 | 0.032321 | 0.187539 |
| 13.Sep    | 0.386932 | 0.388234 | 0.004846 | 0.788876 |
| VCX3A     | 0.63072  | 0.62037  | -0.02387 | 0.540287 |
| TMEM37    | 0.412498 | 0.403905 | -0.03037 | 0.876029 |
| ARHGEF1   | 0.342795 | 0.332873 | -0.04238 | 0.073362 |
| S100A12   | 0.269643 | 0.239187 | -0.17291 | 0.133139 |
| FOXO2     | 0.087232 | 0.086148 | -0.01804 | 0.714689 |
| DHX34     | 0.159539 | 0.156582 | -0.02699 | 0.457621 |
| PYY2      | 0.413734 | 0.413666 | -0.00024 | 0.949872 |
| FUT6      | 0.363472 | 0.372711 | 0.036214 | 0.626512 |
| C21orf130 | 0.42128  | 0.4444   | 0.077078 | 0.367534 |
| GRIA4     | 0.328671 | 0.323784 | -0.02161 | 0.511425 |
| SHC3      | 0.402968 | 0.396685 | -0.02267 | 0.397986 |
| CCDC140   | 0.09762  | 0.094734 | -0.04329 | 0.774574 |
| LOC10028  | 0.272341 | 0.267905 | -0.02369 | 0.351658 |
| SELS      | 0.200316 | 0.200613 | 0.002137 | 0.746201 |
| RNU5E     | 0.332071 | 0.337328 | 0.02266  | 0.546467 |
| NKX1.2    | 0.041685 | 0.040231 | -0.05124 | 0.072977 |
| FLJ45079  | 0.332183 | 0.315062 | -0.07634 | 0.043031 |
| PDCD6IP   | 0.198142 | 0.200678 | 0.018346 | 0.638108 |

|          |          |          |          |          |
|----------|----------|----------|----------|----------|
| GTF2A1L  | 0.806775 | 0.803023 | -0.00673 | 0.217163 |
| PLXNA2   | 0.446313 | 0.436692 | -0.03144 | 0.203613 |
| KLHL3    | 0.398423 | 0.392688 | -0.02092 | 0.283086 |
| OR6C70   | 0.257073 | 0.281952 | 0.133272 | 0.193056 |
| CHIC2    | 0.223225 | 0.229709 | 0.041313 | 0.2332   |
| KISS1R   | 0.067125 | 0.076983 | 0.197681 | 0.51142  |
| 4.Mar    | 0.310158 | 0.312395 | 0.010366 | 0.589061 |
| HMGXB3   | 0.119408 | 0.122289 | 0.034393 | 0.256816 |
| HAO1     | 0.292206 | 0.282453 | -0.04897 | 0.194652 |
| PLEKHM1  | 0.333606 | 0.332262 | -0.00583 | 0.551122 |
| SNORD15f | 0.766461 | 0.722741 | -0.08473 | 0.018223 |
| SIRT7    | 0.397389 | 0.397793 | 0.001467 | 0.91101  |
| AQP1     | 0.662194 | 0.617232 | -0.10144 | 0.008568 |
| TMEM20   | 0.180216 | 0.189113 | 0.069521 | 0.114946 |
| SPDYE1   | 0.934338 | 0.940437 | 0.009387 | 0.60151  |
| WDR31    | 0.056025 | 0.046008 | -0.28418 | 0.278917 |
| T.SP1    | 0.500151 | 0.477181 | -0.06783 | 0.047016 |
| KCNG4    | 0.620438 | 0.589581 | -0.0736  | 0.004245 |
| LOC65062 | 0.691923 | 0.678668 | -0.02791 | 0.089614 |
| HSPBP1   | 0.254794 | 0.256921 | 0.011995 | 0.577871 |
| SLC7A5   | 0.55673  | 0.548895 | -0.02045 | 0.32695  |
| LOC28507 | 0.037389 | 0.037354 | -0.00132 | 0.633111 |
| IL6      | 0.201533 | 0.194723 | -0.04959 | 0.419111 |
| MIRLET7A | 0.504109 | 0.531338 | 0.075896 | 0.160996 |
| OSTC     | 0.182733 | 0.175876 | -0.05518 | 0.200318 |
| HSD11B1  | 0.743841 | 0.730515 | -0.02608 | 0.055621 |
| LY6G6E   | 0.597111 | 0.527867 | -0.17782 | 0.022913 |
| CHUK     | 0.243724 | 0.24531  | 0.009357 | 0.846755 |
| FIBIN    | 0.292829 | 0.298779 | 0.029019 | 0.315594 |
| BAI2     | 0.386852 | 0.392786 | 0.021964 | 0.318972 |
| SH2D6    | 0.632003 | 0.622834 | -0.02108 | 0.517433 |
| SYNGAP1  | 0.437287 | 0.434091 | -0.01058 | 0.354073 |
| CCDC130  | 0.398034 | 0.391684 | -0.0232  | 0.285181 |
| NUCB2    | 0.057533 | 0.059379 | 0.045563 | 0.464698 |
| MIR134   | 0.478977 | 0.476442 | -0.00766 | 0.499518 |
| ITGA11   | 0.411032 | 0.395774 | -0.05457 | 0.021552 |
| DNAJB1   | 0.162201 | 0.163849 | 0.01459  | 0.502482 |
| ZNF786   | 0.299566 | 0.29746  | -0.01018 | 0.503966 |
| SERTAD3  | 0.102779 | 0.105076 | 0.031879 | 0.461862 |
| OXSR1    | 0.246639 | 0.2413   | -0.03157 | 0.44226  |
| TAS2R4   | 0.902579 | 0.900759 | -0.00291 | 0.352848 |
| LIN9     | 0.143705 | 0.146731 | 0.03006  | 0.329254 |
| KRT6A    | 0.674218 | 0.608494 | -0.14797 | 0.043513 |
| IFI44L   | 0.433366 | 0.458971 | 0.082817 | 0.109164 |
| PDCD6    | 0.321891 | 0.317632 | -0.01922 | 0.503968 |
| SLC35F2  | 0.176432 | 0.184912 | 0.067733 | 0.180618 |
| DDN      | 0.094386 | 0.095428 | 0.015836 | 0.821311 |
| TLL2     | 0.368449 | 0.363137 | -0.02095 | 0.218045 |
| CATSPER2 | 0.205973 | 0.208774 | 0.019489 | 0.644776 |
| UTRN     | 0.432411 | 0.442632 | 0.033703 | 0.094102 |
| FUBP3    | 0.768123 | 0.766878 | -0.00234 | 0.841288 |
| CYP39A1  | 0.152224 | 0.161977 | 0.089592 | 0.314471 |
| AKR1A1   | 0.119234 | 0.1243   | 0.060022 | 0.014212 |
| DYNC2LI1 | 0.203394 | 0.199476 | -0.02806 | 0.621568 |
| FAM83D   | 0.090351 | 0.093891 | 0.055449 | 0.065845 |
| CDC42EP5 | 0.179978 | 0.17488  | -0.04146 | 0.432641 |

|           |          |          |          |          |
|-----------|----------|----------|----------|----------|
| NPPC      | 0.092292 | 0.08554  | -0.10961 | 0.019765 |
| C17orf70  | 0.393767 | 0.391205 | -0.00942 | 0.643105 |
| SNRPG     | 0.143962 | 0.143833 | -0.00129 | 0.923945 |
| STRBP     | 0.329081 | 0.329738 | 0.00288  | 0.923945 |
| IL1RAP    | 0.182558 | 0.179601 | -0.02356 | 0.688795 |
| ADORA2B   | 0.318684 | 0.32744  | 0.039103 | 0.085302 |
| STYX      | 0.134239 | 0.133528 | -0.00766 | 0.986996 |
| PDSS2     | 0.177398 | 0.182606 | 0.041747 | 0.1374   |
| RWDD3     | 0.262395 | 0.272771 | 0.055949 | 0.15082  |
| PICK1     | 0.346745 | 0.34323  | -0.0147  | 0.621569 |
| NCLN      | 0.600902 | 0.59031  | -0.02566 | 0.083209 |
| CCDC65    | 0.328429 | 0.326502 | -0.00849 | 0.983281 |
| SRPK3     | 0.47672  | 0.48584  | 0.027338 | 0.509929 |
| ZNF460    | 0.057384 | 0.061151 | 0.091739 | 0.291522 |
| CENPA     | 0.151684 | 0.156757 | 0.04746  | 0.330409 |
| IGFBP4    | 0.367955 | 0.368651 | 0.002729 | 0.628162 |
| PCDHB17   | 0.449063 | 0.466261 | 0.054221 | 0.555799 |
| GPR157    | 0.136323 | 0.138816 | 0.026147 | 0.797852 |
| NDOR1     | 0.642425 | 0.635613 | -0.01538 | 0.541828 |
| KIAA1377  | 0.213827 | 0.209023 | -0.03278 | 0.916551 |
| SP5       | 0.052234 | 0.053358 | 0.030712 | 0.803245 |
| CHRNA10   | 0.691941 | 0.681035 | -0.02292 | 0.102139 |
| LIPT1     | 0.134008 | 0.140148 | 0.064631 | 0.078358 |
| CHPT1     | 0.112882 | 0.115952 | 0.038704 | 0.123779 |
| SNORD42   | 0.681465 | 0.674263 | -0.01533 | 0.546463 |
| RAB25     | 0.453113 | 0.44177  | -0.03658 | 0.390234 |
| GRIK2     | 0.305708 | 0.318439 | 0.058863 | 0.412439 |
| DNM1P35   | 0.096331 | 0.102994 | 0.096484 | 0.034696 |
| CPEB2     | 0.154232 | 0.160728 | 0.05952  | 0.010783 |
| TRIM32    | 0.935454 | 0.935518 | 9.98E-05 | 0.653102 |
| CSNK1A1L  | 0.587608 | 0.586125 | -0.00365 | 0.503965 |
| SV2A      | 0.242797 | 0.244682 | 0.011157 | 0.386391 |
| FAR2      | 0.603677 | 0.62006  | 0.038633 | 0.071146 |
| CRISP3    | 0.341048 | 0.379443 | 0.153909 | 0.206109 |
| MAP2K6    | 0.282515 | 0.276134 | -0.03296 | 0.247175 |
| VCX3B     | 0.328675 | 0.32664  | -0.00896 | 0.922096 |
| LOC12784  | 0.268305 | 0.255097 | -0.07282 | 0.034696 |
| CLEC4E    | 0.121397 | 0.124015 | 0.030779 | 0.824936 |
| MASP1     | 0.524746 | 0.518358 | -0.01767 | 0.481939 |
| PHC1      | 0.202559 | 0.197767 | -0.03454 | 0.223312 |
| C14orf166 | 0.71871  | 0.700128 | -0.03779 | 0.005671 |
| UTS2D     | 0.242059 | 0.2508   | 0.051176 | 0.427197 |
| PARP1     | 0.260451 | 0.252601 | -0.04415 | 0.130158 |
| FMO6P     | 0.245345 | 0.227674 | -0.10784 | 0.149501 |
| REG3G     | 0.561735 | 0.556691 | -0.01302 | 0.749728 |
| KRTAP9.8  | 0.399418 | 0.358931 | -0.15419 | 0.18444  |
| LOC80054  | 0.161232 | 0.144954 | -0.15354 | 0.083626 |
| CNIH      | 0.19423  | 0.194559 | 0.002441 | 0.563634 |
| BTBD8     | 0.200953 | 0.194253 | -0.04892 | 0.154154 |
| GJD4      | 0.495967 | 0.489354 | -0.01937 | 0.496565 |
| WDR33     | 0.493955 | 0.498654 | 0.013658 | 0.57628  |
| HMGCL     | 0.459268 | 0.454167 | -0.01611 | 0.303399 |
| LOC1      | 0.112256 | 0.12759  | 0.184728 | 0.435374 |
| PRKAG2    | 0.534423 | 0.531677 | -0.00743 | 0.601968 |
| ZNF587    | 0.31788  | 0.319765 | 0.008528 | 0.653151 |
| CHTF8     | 0.182115 | 0.180273 | -0.01466 | 0.638109 |

|           |          |          |          |          |
|-----------|----------|----------|----------|----------|
| FOLR4     | 0.2311   | 0.216547 | -0.09384 | 0.141767 |
| CASP14    | 0.299287 | 0.287698 | -0.05697 | 0.203613 |
| FAM32A    | 0.093046 | 0.095002 | 0.030019 | 0.201138 |
| NOS1AP    | 0.47441  | 0.477257 | 0.008629 | 0.515926 |
| TMEM63B   | 0.442286 | 0.44194  | -0.00113 | 0.790669 |
| TMEM102   | 0.200623 | 0.198963 | -0.01199 | 0.526515 |
| RDH11     | 0.317065 | 0.310875 | -0.02844 | 0.296881 |
| KIAA1919  | 0.185981 | 0.186657 | 0.00523  | 0.643107 |
| STX12     | 0.282266 | 0.283595 | 0.006776 | 0.905473 |
| LCP2      | 0.627827 | 0.604607 | -0.05437 | 0.113344 |
| PRDM13    | 0.101477 | 0.099332 | -0.03083 | 0.517434 |
| MCM3AP    | 0.172948 | 0.177309 | 0.035922 | 0.266714 |
| BTF3      | 0.199365 | 0.197113 | -0.01638 | 0.066191 |
| CLPS      | 0.637657 | 0.621501 | -0.03702 | 0.093184 |
| LIX1L     | 0.105988 | 0.106554 | 0.007674 | 0.473275 |
| VTG1      | 0.147613 | 0.149987 | 0.023017 | 0.438122 |
| CPO       | 0.432137 | 0.428099 | -0.01354 | 0.367532 |
| MMP23A    | 0.421255 | 0.483151 | 0.197779 | 0.138018 |
| SOX9      | 0.194481 | 0.184997 | -0.07213 | 0.10712  |
| PLIN5     | 0.233812 | 0.22491  | -0.056   | 0.173892 |
| PRKAA2    | 0.07458  | 0.07525  | 0.012894 | 0.940604 |
| PPIL3     | 0.265901 | 0.268106 | 0.011914 | 0.555798 |
| CELA2B    | 0.834437 | 0.825635 | -0.0153  | 0.400583 |
| ZNF789    | 0.186566 | 0.185806 | -0.00589 | 0.80325  |
| UBL3      | 0.320846 | 0.316705 | -0.01874 | 0.466123 |
| MIR450B   | 0.812574 | 0.859554 | 0.081088 | 0.072984 |
| C9orf167  | 0.407091 | 0.428874 | 0.075201 | 0.292592 |
| CLASP2    | 0.18147  | 0.18265  | 0.009354 | 0.59873  |
| MPRIIP    | 0.57511  | 0.580572 | 0.013636 | 0.355283 |
| TRPC2     | 0.746909 | 0.723494 | -0.04595 | 0.026014 |
| KRTAP17.1 | 0.491282 | 0.438252 | -0.16479 | 0.056825 |
| H2AFV     | 0.148664 | 0.15534  | 0.063373 | 0.055623 |
| CHRNA3    | 0.566357 | 0.58946  | 0.057683 | 0.48776  |
| SAR1B     | 0.132492 | 0.136955 | 0.047794 | 0.052996 |
| CD177     | 0.353144 | 0.397985 | 0.172458 | 0.08116  |
| MPI       | 0.218132 | 0.219763 | 0.010743 | 0.41777  |
| BAIAP2    | 0.542754 | 0.534742 | -0.02146 | 0.200317 |
| BTRC      | 0.229284 | 0.226686 | -0.01644 | 0.558927 |
| ZNF621    | 0.123865 | 0.125474 | 0.018613 | 0.339749 |
| C4orf51   | 0.286361 | 0.300336 | 0.068739 | 0.028617 |
| GPR35     | 0.534627 | 0.514499 | -0.05536 | 0.295806 |
| FIBCD1    | 0.456    | 0.426089 | -0.09788 | 0.047797 |
| MEGF6     | 0.438265 | 0.435807 | -0.00812 | 0.994427 |
| CTHRC1    | 0.232046 | 0.231746 | -0.00186 | 0.603592 |
| LRRTM4    | 0.433401 | 0.446383 | 0.042578 | 0.141768 |
| KCNQ1DN   | 0.413649 | 0.377353 | -0.13249 | 0.293662 |
| SPINK9    | 0.454228 | 0.455606 | 0.004369 | 0.735648 |
| YIPF1     | 0.162273 | 0.163882 | 0.014242 | 0.223309 |
| RNF207    | 0.404023 | 0.436731 | 0.112308 | 0.088304 |
| C11orf30  | 0.168135 | 0.17062  | 0.021164 | 0.302305 |
| SNORD116  | 0.64366  | 0.664651 | 0.046298 | 0.440876 |
| LOC388491 | 0.881158 | 0.867842 | -0.02197 | 0.054729 |
| ZSCAN16   | 0.13686  | 0.125809 | -0.12147 | 0.09456  |
| FHDC1     | 0.703088 | 0.694524 | -0.01768 | 0.16169  |
| TNRC18    | 0.545326 | 0.540668 | -0.01238 | 0.424491 |
| CRHBP     | 0.331693 | 0.364442 | 0.135839 | 0.052431 |

|           |          |          |          |          |
|-----------|----------|----------|----------|----------|
| RTKN2     | 0.200646 | 0.201359 | 0.005124 | 0.87236  |
| SUV420H1  | 0.346443 | 0.350737 | 0.017772 | 0.581059 |
| ZNF320    | 0.23309  | 0.235746 | 0.016344 | 0.944311 |
| CCDC163F  | 0.169524 | 0.182194 | 0.103985 | 0.33975  |
| ESRRA     | 0.34445  | 0.350049 | 0.023262 | 0.397987 |
| ODF3L1    | 0.473725 | 0.460102 | -0.0421  | 0.050753 |
| DACT2     | 0.430064 | 0.443822 | 0.045431 | 0.32466  |
| C3orf43   | 0.333009 | 0.32254  | -0.04608 | 0.149501 |
| PRR20A    | 0.189044 | 0.208702 | 0.142725 | 0.048589 |
| CHST14    | 0.088832 | 0.089196 | 0.005904 | 0.524996 |
| TMEM151f  | 0.534663 | 0.546203 | 0.030808 | 0.077181 |
| TGIF1     | 0.191725 | 0.200225 | 0.062584 | 0.48049  |
| BEGAIN    | 0.453981 | 0.454048 | 0.000214 | 0.964713 |
| DCK       | 0.120034 | 0.124221 | 0.04947  | 0.139883 |
| KIF3B     | 0.166664 | 0.165866 | -0.00692 | 0.994427 |
| LRRC69    | 0.446601 | 0.455703 | 0.029107 | 0.247179 |
| JOSD2     | 0.221422 | 0.235895 | 0.091347 | 0.00345  |
| PEX3      | 0.142957 | 0.143864 | 0.009133 | 0.412438 |
| LOC91450  | 0.457398 | 0.46183  | 0.013912 | 0.670033 |
| CREG1     | 0.205325 | 0.193965 | -0.08211 | 0.07718  |
| C3P1      | 0.184903 | 0.193113 | 0.062675 | 0.646449 |
| MANEA     | 0.126248 | 0.13086  | 0.051768 | 0.096411 |
| LOC28519  | 0.387745 | 0.404724 | 0.061832 | 0.087868 |
| ASAM      | 0.418041 | 0.413807 | -0.01468 | 0.498043 |
| BBS1      | 0.081185 | 0.080538 | -0.01154 | 0.401884 |
| CPSF2     | 0.112316 | 0.10819  | -0.05401 | 0.408466 |
| TSNARE1   | 0.609034 | 0.604075 | -0.0118  | 0.300126 |
| HMG20A    | 0.336757 | 0.339905 | 0.013422 | 0.877864 |
| MAP4K1    | 0.225314 | 0.225552 | 0.001521 | 0.912856 |
| CRYBA4    | 0.587742 | 0.557864 | -0.07527 | 0.019643 |
| TDRD9     | 0.476037 | 0.488501 | 0.037287 | 0.258776 |
| DSG3      | 0.469642 | 0.485264 | 0.047211 | 0.457621 |
| EFCAB1    | 0.191422 | 0.200946 | 0.070047 | 0.112816 |
| CRK       | 0.224065 | 0.230563 | 0.041248 | 0.043512 |
| PMCHL2    | 0.242599 | 0.24023  | -0.01416 | 0.66495  |
| MX1       | 0.211244 | 0.241036 | 0.190338 | 0.020263 |
| FAM136B   | 0.78421  | 0.705394 | -0.15281 | 0.001143 |
| PKDREJ    | 0.536207 | 0.544625 | 0.022473 | 0.312237 |
| SERPINA4  | 0.527305 | 0.5116   | -0.04362 | 0.166636 |
| CPNE5     | 0.460691 | 0.44422  | -0.05252 | 0.037805 |
| RNF145    | 0.321475 | 0.319769 | -0.00768 | 0.658198 |
| NPPB      | 0.231652 | 0.210692 | -0.13682 | 0.047275 |
| LRRC46    | 0.153971 | 0.159415 | 0.050135 | 0.260743 |
| KBTBD10   | 0.662445 | 0.686973 | 0.052452 | 0.252928 |
| BMP8A     | 0.178071 | 0.186901 | 0.069824 | 0.193852 |
| MST1P2    | 0.355647 | 0.356264 | 0.0025   | 0.568362 |
| CDH20     | 0.691875 | 0.699792 | 0.016415 | 0.415098 |
| GMPR      | 0.166818 | 0.162828 | -0.03493 | 0.324657 |
| DDX54     | 0.510869 | 0.502357 | -0.02424 | 0.276866 |
| DKFZp761f | 0.369886 | 0.386355 | 0.062846 | 0.259758 |
| PDE8B     | 0.319322 | 0.33638  | 0.07508  | 0.18444  |
| CLK4      | 0.163851 | 0.163297 | -0.00489 | 0.531086 |
| SLC39A6   | 0.210766 | 0.212127 | 0.00929  | 0.760346 |
| CCL14     | 0.365098 | 0.336942 | -0.11578 | 0.274818 |
| KIAA0895  | 0.381319 | 0.379763 | -0.0059  | 0.551122 |
| CETN1     | 0.68493  | 0.702688 | 0.036928 | 0.778142 |

|           |          |          |          |          |
|-----------|----------|----------|----------|----------|
| GML       | 0.45168  | 0.439861 | -0.03825 | 0.460445 |
| TAGAP     | 0.464382 | 0.451213 | -0.0415  | 0.383842 |
| PAF1      | 0.256771 | 0.258887 | 0.011841 | 0.653153 |
| IRF4      | 0.083904 | 0.085188 | 0.021921 | 0.562061 |
| C3orf26   | 0.564015 | 0.567691 | 0.009372 | 0.610101 |
| RAD23A    | 0.212195 | 0.211125 | -0.00729 | 0.792464 |
| AKR1D1    | 0.433946 | 0.472522 | 0.122868 | 0.021819 |
| NRAS      | 0.243114 | 0.24862  | 0.032312 | 0.409789 |
| RCSD1     | 0.504916 | 0.495742 | -0.02646 | 0.529561 |
| RP1       | 0.39772  | 0.402334 | 0.016643 | 0.571524 |
| DYRK1A    | 0.321696 | 0.331087 | 0.041511 | 0.187539 |
| LRP12     | 0.363762 | 0.372887 | 0.035745 | 0.195453 |
| LOC93432  | 0.438521 | 0.455931 | 0.05617  | 0.391521 |
| RNF133    | 0.362852 | 0.367914 | 0.019985 | 0.894414 |
| FAM46B    | 0.389219 | 0.374729 | -0.05474 | 0.033129 |
| CLGN      | 0.062697 | 0.058079 | -0.11038 | 0.115476 |
| IGSF1     | 0.363546 | 0.32641  | -0.15545 | 0.032368 |
| UCP1      | 0.164574 | 0.14816  | -0.15158 | 0.043272 |
| ACAD10    | 0.172599 | 0.177274 | 0.038557 | 0.144307 |
| CXCL9     | 0.185982 | 0.192076 | 0.046519 | 0.735648 |
| SPTLC2    | 0.25072  | 0.249258 | -0.00844 | 0.972138 |
| BHLHA15   | 0.646931 | 0.660292 | 0.029491 | 0.377516 |
| FNDC8     | 0.372381 | 0.367916 | -0.0174  | 0.597115 |
| SOCS6     | 0.251215 | 0.252082 | 0.004969 | 0.940604 |
| PHKA2     | 0.186922 | 0.201645 | 0.109387 | 0.10411  |
| NNT       | 0.145429 | 0.142984 | -0.02447 | 0.733892 |
| DCAF15    | 0.76491  | 0.779712 | 0.027651 | 0.139881 |
| LGMN      | 0.289226 | 0.284413 | -0.02421 | 0.251003 |
| UTP14C    | 0.602746 | 0.607993 | 0.012504 | 0.409786 |
| RAPH1     | 0.154435 | 0.156012 | 0.014661 | 0.366295 |
| CNNM1     | 0.372182 | 0.395649 | 0.088212 | 0.052431 |
| CRB3      | 0.185777 | 0.186111 | 0.00259  | 0.211166 |
| C1orf190  | 0.046621 | 0.032822 | -0.50632 | 0.834    |
| CXCR1     | 0.417425 | 0.376947 | -0.14716 | 0.028448 |
| KRT31     | 0.704522 | 0.651761 | -0.1123  | 0.003857 |
| DHX32     | 0.582383 | 0.594333 | 0.029302 | 0.435376 |
| GRK6      | 0.581008 | 0.583376 | 0.00587  | 0.562062 |
| PFKL      | 0.534528 | 0.559918 | 0.066948 | 0.246227 |
| ARHGEF4   | 0.466492 | 0.470234 | 0.011528 | 0.517435 |
| FLJ41856  | 0.115821 | 0.112718 | -0.03918 | 0.502482 |
| DUSP22    | 0.426301 | 0.420426 | -0.02002 | 0.532615 |
| SMCHD1    | 0.079945 | 0.076902 | -0.05599 | 0.241516 |
| CD2AP     | 0.289218 | 0.30067  | 0.056024 | 0.204443 |
| AK3L1     | 0.246934 | 0.248502 | 0.009136 | 0.490686 |
| MT1E      | 0.134479 | 0.107182 | -0.32732 | 0.376261 |
| TCEB2     | 0.112923 | 0.114888 | 0.024891 | 0.603593 |
| LDLRAP1   | 0.296706 | 0.285026 | -0.05794 | 0.063487 |
| CCDC103   | 0.149482 | 0.143847 | -0.05544 | 0.220666 |
| ACSF2     | 0.414967 | 0.39918  | -0.05596 | 0.173155 |
| AARS2     | 0.199805 | 0.201635 | 0.013157 | 0.48339  |
| KRTAP21.3 | 0.647669 | 0.745729 | 0.203393 | 0.009619 |
| CCDC24    | 0.188509 | 0.194991 | 0.048776 | 0.179861 |
| HSPA5     | 0.100378 | 0.101165 | 0.011263 | 0.718167 |
| ADAM11    | 0.223485 | 0.217874 | -0.03668 | 0.122648 |
| SRRT      | 0.510516 | 0.502336 | -0.0233  | 0.224196 |
| BRD8      | 0.073268 | 0.072579 | -0.01364 | 0.966569 |

|           |          |          |          |          |
|-----------|----------|----------|----------|----------|
| STK11     | 0.568765 | 0.565977 | -0.00709 | 0.445029 |
| CLDN23    | 0.327395 | 0.335079 | 0.03347  | 0.534145 |
| MSRB3     | 0.361813 | 0.346418 | -0.06273 | 0.371257 |
| MTRR      | 0.20537  | 0.20763  | 0.015787 | 0.460444 |
| C1orf70   | 0.573134 | 0.571617 | -0.00383 | 0.707751 |
| MRPL3     | 0.14719  | 0.148532 | 0.013102 | 0.432639 |
| LOC100121 | 0.815424 | 0.79948  | -0.02849 | 0.154151 |
| FLVCR2    | 0.279543 | 0.273244 | -0.03288 | 0.313353 |
| NINL      | 0.235498 | 0.228447 | -0.04386 | 0.093191 |
| TMEM201   | 0.456634 | 0.457992 | 0.004284 | 0.903629 |
| SHKBP1    | 0.175212 | 0.178649 | 0.028026 | 0.723396 |
| BTBD3     | 0.255899 | 0.271363 | 0.084648 | 0.17463  |
| HIGD2B    | 0.099903 | 0.101275 | 0.019677 | 0.535677 |
| MMAB      | 0.074621 | 0.074061 | -0.01087 | 0.481934 |
| GTF2H2C   | 0.223198 | 0.225665 | 0.01586  | 0.611735 |
| PLOD3     | 0.520319 | 0.52314  | 0.0078   | 0.651471 |
| RHCE      | 0.327923 | 0.318608 | -0.04158 | 0.20947  |
| HSPA6     | 0.234971 | 0.240019 | 0.030664 | 0.421796 |
| HMG1      | 0.187454 | 0.186883 | -0.0044  | 0.641439 |
| MS4A3     | 0.313879 | 0.361271 | 0.202872 | 0.138019 |
| HIST2H2B  | 0.289392 | 0.310196 | 0.100155 | 0.099722 |
| FAM90A1C  | 0.464084 | 0.48479  | 0.062974 | 0.2779   |
| KLK5      | 0.312823 | 0.318713 | 0.026908 | 0.850404 |
| ST6GALNA  | 0.211206 | 0.210771 | -0.00297 | 0.903629 |
| UBTD2     | 0.303056 | 0.300054 | -0.01436 | 0.358931 |
| CMTM8     | 0.235333 | 0.231724 | -0.02229 | 0.79965  |
| VN1R4     | 0.060551 | 0.059358 | -0.0287  | 0.427195 |
| TUBA1B    | 0.061404 | 0.06377  | 0.054538 | 0.221539 |
| NKX2.1    | 0.043539 | 0.044254 | 0.023501 | 0.206933 |
| NCSTN     | 0.533746 | 0.540308 | 0.01763  | 0.544916 |
| NANOS2    | 0.463852 | 0.437037 | -0.08591 | 0.019766 |
| DIS3L     | 0.348928 | 0.330143 | -0.07984 | 0.082797 |
| BAI1      | 0.550352 | 0.528137 | -0.05944 | 0.041612 |
| OTOR      | 0.584113 | 0.54348  | -0.10402 | 0.077964 |
| CCDC160   | 0.306329 | 0.312543 | 0.028973 | 0.746202 |
| C8orf48   | 0.143701 | 0.151241 | 0.073783 | 0.18444  |
| COL4A4    | 0.776413 | 0.767412 | -0.01682 | 0.451996 |
| LENEP     | 0.695524 | 0.699631 | 0.008495 | 0.695666 |
| TMC2      | 0.541847 | 0.524082 | -0.04809 | 0.267716 |
| SERPINI2  | 0.516192 | 0.604648 | 0.228188 | 0.003373 |
| KRTAP10.9 | 0.16556  | 0.161658 | -0.03441 | 0.577872 |
| LOC38896  | 0.675437 | 0.666451 | -0.01932 | 0.449203 |
| MMRN1     | 0.616118 | 0.598304 | -0.04233 | 0.138636 |
| HS1BP3    | 0.131427 | 0.127011 | -0.04931 | 0.236869 |
| ZNF572    | 0.248307 | 0.27018  | 0.121797 | 0.036534 |
| NDUFAF3   | 0.230395 | 0.242988 | 0.076773 | 0.152815 |
| LOC25735  | 0.529909 | 0.489795 | -0.11357 | 0.009555 |
| NSUN6     | 0.062093 | 0.065498 | 0.077019 | 0.104105 |
| NKIRAS1   | 0.169797 | 0.171467 | 0.014118 | 0.411112 |
| C6orf122  | 0.184578 | 0.180957 | -0.02859 | 0.628163 |
| HEXDC     | 0.546841 | 0.551582 | 0.012453 | 0.442254 |
| NEAT1     | 0.105569 | 0.1429   | 0.436817 | 0.026329 |
| DNAJC5B   | 0.32731  | 0.293914 | -0.15526 | 0.136786 |
| CIAPIN1   | 0.354436 | 0.349268 | -0.02119 | 0.315593 |
| PMM1      | 0.140177 | 0.140425 | 0.002551 | 0.526516 |
| YTHDF2    | 0.245792 | 0.240666 | -0.03041 | 0.340931 |

|          |          |          |          |          |
|----------|----------|----------|----------|----------|
| ARHGEF5L | 0.196446 | 0.219001 | 0.156802 | 0.113877 |
| CDH3     | 0.402792 | 0.395089 | -0.02786 | 0.221546 |
| PAN3     | 0.38037  | 0.390184 | 0.03675  | 0.308902 |
| PPP1R9B  | 0.125196 | 0.122316 | -0.03358 | 0.277898 |
| OSBPL7   | 0.619284 | 0.608145 | -0.02619 | 0.060555 |
| SLMO1    | 0.279317 | 0.277285 | -0.01053 | 0.38767  |
| SPRYD5   | 0.300828 | 0.308687 | 0.037206 | 0.524997 |
| LOC14633 | 0.212855 | 0.215239 | 0.016071 | 0.732141 |
| PMP22    | 0.235254 | 0.236089 | 0.005111 | 0.440877 |
| KBTBD3   | 0.160812 | 0.162081 | 0.011344 | 0.520452 |
| AGFG2    | 0.156263 | 0.165681 | 0.084433 | 0.059606 |
| HCG22    | 0.276467 | 0.289655 | 0.067227 | 0.46755  |
| EXOC4    | 0.519465 | 0.525111 | 0.015596 | 0.409788 |
| PPM1H    | 0.371028 | 0.381728 | 0.041017 | 0.089177 |
| CD300A   | 0.587705 | 0.506283 | -0.21515 | 0.006177 |
| FAM3B    | 0.160436 | 0.176474 | 0.137452 | 0.144311 |
| STH      | 0.909988 | 0.903116 | -0.01094 | 0.011828 |
| AKAP13   | 0.428221 | 0.426    | -0.0075  | 0.819501 |
| PSG1     | 0.144571 | 0.149308 | 0.046514 | 0.511426 |
| C16orf55 | 0.350226 | 0.347858 | -0.00979 | 0.526516 |
| LIPC     | 0.681069 | 0.668902 | -0.02601 | 0.304495 |
| NCRNA000 | 0.239792 | 0.22767  | -0.07484 | 0.251003 |
| ARMCX5   | 0.163965 | 0.182459 | 0.154179 | 0.034299 |
| HUS1     | 0.464735 | 0.47352  | 0.027019 | 0.396688 |
| MIR2052  | 0.61295  | 0.644528 | 0.072475 | 0.382573 |
| FAM101B  | 0.558965 | 0.589579 | 0.076927 | 0.153482 |
| RNF144A  | 0.398678 | 0.402527 | 0.013862 | 0.633127 |
| SLURP1   | 0.750939 | 0.71007  | -0.08073 | 0.020388 |
| SCGBL    | 0.410511 | 0.449573 | 0.131135 | 0.038021 |
| NCRNA000 | 0.158454 | 0.158076 | -0.00345 | 0.623213 |
| ZNF134   | 0.242946 | 0.238164 | -0.02868 | 0.534143 |
| LLPH     | 0.088136 | 0.091993 | 0.061788 | 0.300127 |
| MED26    | 0.236655 | 0.234742 | -0.01171 | 0.760348 |
| ARHGEF3  | 0.402077 | 0.395712 | -0.02302 | 0.253898 |
| ZNF229   | 0.190788 | 0.210694 | 0.143182 | 0.01064  |
| NCAN     | 0.30377  | 0.327245 | 0.107392 | 0.082797 |
| ZDHHC24  | 0.186307 | 0.179218 | -0.05597 | 0.338574 |
| CD3G     | 0.313128 | 0.287048 | -0.12546 | 0.064155 |
| BRMS1L   | 0.088716 | 0.092348 | 0.057879 | 0.097347 |
| ADAM10   | 0.36722  | 0.370678 | 0.013523 | 0.814076 |
| FAM134A  | 0.086373 | 0.08516  | -0.02041 | 0.515928 |
| ZNF492   | 0.051241 | 0.049679 | -0.04464 | 0.193846 |
| GPR110   | 0.467928 | 0.509473 | 0.122719 | 0.133138 |
| METRN    | 0.268715 | 0.257166 | -0.06338 | 0.474715 |
| MIR33B   | 0.789544 | 0.784523 | -0.0092  | 0.493616 |
| FMNL3    | 0.280315 | 0.274212 | -0.03176 | 0.32466  |
| LOC16847 | 0.530569 | 0.54363  | 0.035085 | 0.474714 |
| RNF115   | 0.369117 | 0.36517  | -0.01551 | 0.45903  |
| ZMAT3    | 0.155458 | 0.156659 | 0.011101 | 0.839469 |
| STK32A   | 0.12518  | 0.123507 | -0.0194  | 0.676832 |
| SERPINB6 | 0.318806 | 0.30129  | -0.08153 | 0.024055 |
| TTC3L    | 0.80976  | 0.802647 | -0.01273 | 0.62816  |
| MBD4     | 0.218445 | 0.215916 | -0.0168  | 0.707752 |
| C13orf35 | 0.422428 | 0.405323 | -0.05963 | 0.170235 |
| SORCS1   | 0.343113 | 0.342625 | -0.00205 | 0.961001 |
| PPAP2B   | 0.493049 | 0.485418 | -0.0225  | 0.268723 |

|          |          |          |          |          |
|----------|----------|----------|----------|----------|
| EVX1     | 0.103622 | 0.099607 | -0.057   | 0.839468 |
| CNNM4    | 0.365585 | 0.366584 | 0.003939 | 0.747964 |
| RGS9BP   | 0.072771 | 0.069843 | -0.05924 | 0.702558 |
| CRYGC    | 0.32636  | 0.336033 | 0.042139 | 0.531087 |
| NSUN2    | 0.388087 | 0.386726 | -0.00507 | 0.826749 |
| FAM22A   | 0.664082 | 0.656067 | -0.01752 | 0.300128 |
| POP4     | 0.268596 | 0.268614 | 9.30E-05 | 0.898098 |
| LIPK     | 0.821847 | 0.834447 | 0.021952 | 0.084039 |
| KLHL20   | 0.19908  | 0.194635 | -0.03257 | 0.111761 |
| SNORD115 | 0.417611 | 0.399209 | -0.06501 | 0.400593 |
| ADSS     | 0.265541 | 0.27046  | 0.02648  | 0.76745  |
| NAA40    | 0.189607 | 0.193844 | 0.031885 | 0.360152 |
| PLA2G4A  | 0.292221 | 0.299586 | 0.035908 | 0.629816 |
| DBI      | 0.344096 | 0.337489 | -0.02797 | 0.434006 |
| ARMC1    | 0.181873 | 0.181333 | -0.00429 | 0.848579 |
| MIR651   | 0.856686 | 0.870341 | 0.022816 | 0.946159 |
| CHCHD10  | 0.212255 | 0.214387 | 0.014421 | 0.449205 |
| NCOA1    | 0.285431 | 0.279813 | -0.02868 | 0.256817 |
| CSN2     | 0.585586 | 0.678888 | 0.213292 | 0.014584 |
| CAND1    | 0.168634 | 0.169011 | 0.003217 | 0.416434 |
| FBLN7    | 0.490829 | 0.511958 | 0.060804 | 0.053862 |
| CACNA1H  | 0.563893 | 0.524925 | -0.10331 | 0.052999 |
| OR8K1    | 0.264564 | 0.306766 | 0.21352  | 0.031623 |
| LOC72960 | 0.107883 | 0.132094 | 0.292092 | 0.136785 |
| LRFN1    | 0.648782 | 0.661416 | 0.027824 | 0.30559  |
| LRCH3    | 0.210344 | 0.203057 | -0.05087 | 0.18832  |
| HECW1    | 0.509334 | 0.50232  | -0.02001 | 0.311121 |
| ADD1     | 0.523363 | 0.523479 | 0.000319 | 0.857711 |
| CRYBA1   | 0.69123  | 0.678489 | -0.02684 | 0.024941 |
| C15orf51 | 0.42797  | 0.418738 | -0.03146 | 0.322378 |
| TMED8    | 0.520017 | 0.542891 | 0.062103 | 0.011449 |
| CTSL2    | 0.229423 | 0.225265 | -0.02639 | 0.310012 |
| NAGPA    | 0.279592 | 0.288572 | 0.045608 | 0.235029 |
| LOC15056 | 0.468477 | 0.488686 | 0.060932 | 0.438122 |
| SLC39A9  | 0.143372 | 0.144809 | 0.014388 | 0.70602  |
| ZNF321   | 0.206434 | 0.211838 | 0.037283 | 0.395393 |
| BARD1    | 0.171296 | 0.176865 | 0.046157 | 0.061197 |
| AQP2     | 0.561486 | 0.533889 | -0.07271 | 0.023765 |
| EXTL1    | 0.218261 | 0.203849 | -0.09855 | 0.00609  |
| ZMYM2    | 0.283949 | 0.295966 | 0.059798 | 0.251964 |
| BCL2L2   | 0.218524 | 0.223489 | 0.032417 | 0.338574 |
| NACC1    | 0.533461 | 0.528045 | -0.01472 | 0.408466 |
| OR52K1   | 0.380675 | 0.414358 | 0.122321 | 0.263718 |
| MIR54814 | 0.66303  | 0.667424 | 0.009529 | 0.439496 |
| S1PR5    | 0.099074 | 0.095087 | -0.05926 | 0.464699 |
| LCE2C    | 0.176978 | 0.169243 | -0.06448 | 0.240583 |
| C10orf40 | 0.45684  | 0.464955 | 0.025403 | 0.287286 |
| GLRX5    | 0.094868 | 0.097252 | 0.035807 | 0.181376 |
| TAS2R40  | 0.603176 | 0.574403 | -0.07052 | 0.021685 |
| LOC21934 | 0.050844 | 0.051508 | 0.018726 | 0.523472 |
| PEX13    | 0.107364 | 0.108156 | 0.010606 | 0.499518 |
| CCT3     | 0.161671 | 0.156349 | -0.04829 | 0.543373 |
| RASEF    | 0.187171 | 0.166539 | -0.1685  | 0.006047 |
| NECAB3   | 0.320448 | 0.316864 | -0.01623 | 0.443643 |
| TRIM34   | 0.270415 | 0.295054 | 0.125799 | 0.576282 |
| C2CD4C   | 0.383507 | 0.380255 | -0.01228 | 0.71991  |

|          |          |          |          |          |
|----------|----------|----------|----------|----------|
| GDPD3    | 0.60922  | 0.596973 | -0.0293  | 0.124349 |
| MLX      | 0.167447 | 0.165744 | -0.01475 | 0.310011 |
| LTV1     | 0.19202  | 0.196645 | 0.03433  | 0.218046 |
| FAM115A  | 0.107726 | 0.107254 | -0.00633 | 0.894413 |
| HPS1     | 0.46096  | 0.447491 | -0.04278 | 0.194652 |
| PATZ1    | 0.169814 | 0.161489 | -0.07251 | 0.038454 |
| OR2L13   | 0.281697 | 0.274985 | -0.03479 | 0.944311 |
| HCP5     | 0.059862 | 0.062729 | 0.067496 | 0.099242 |
| COX4I1   | 0.410537 | 0.405144 | -0.01908 | 0.373755 |
| C9orf68  | 0.113342 | 0.116488 | 0.039502 | 0.263718 |
| MET      | 0.325337 | 0.324014 | -0.00588 | 0.949872 |
| FCN3     | 0.716831 | 0.669631 | -0.09827 | 0.028786 |
| RPS6KA3  | 0.236585 | 0.261305 | 0.143378 | 0.076019 |
| ZNF93    | 0.054121 | 0.053123 | -0.02684 | 0.431265 |
| NELL2    | 0.233463 | 0.238134 | 0.028579 | 0.211166 |
| RAB31    | 0.179661 | 0.180703 | 0.008341 | 0.60197  |
| CYP4A11  | 0.396642 | 0.371629 | -0.09397 | 0.185985 |
| CCDC137  | 0.239822 | 0.23723  | -0.01568 | 0.496566 |
| LOC73178 | 0.637226 | 0.639846 | 0.005919 | 0.961001 |
| TGFB1    | 0.531588 | 0.51423  | -0.04789 | 0.440878 |
| APOBEC2  | 0.551707 | 0.554964 | 0.00849  | 0.735647 |
| MIR138.1 | 0.560035 | 0.560499 | 0.001196 | 0.95729  |
| TARS     | 0.185318 | 0.186049 | 0.005681 | 0.577871 |
| ATAD1    | 0.239637 | 0.247506 | 0.046612 | 0.311123 |
| MIOS     | 0.113261 | 0.117903 | 0.057943 | 0.032556 |
| AK5      | 0.371974 | 0.374621 | 0.010227 | 0.593886 |
| AGAP3    | 0.514017 | 0.512712 | -0.00367 | 0.613369 |
| RFT1     | 0.116705 | 0.120181 | 0.042348 | 0.039557 |
| CNN2     | 0.244051 | 0.241685 | -0.01406 | 0.385117 |
| SNX7     | 0.151916 | 0.147471 | -0.04284 | 0.16951  |
| SP140    | 0.425459 | 0.430125 | 0.015736 | 0.511426 |
| SPRN     | 0.241381 | 0.257254 | 0.091883 | 0.098767 |
| RNF138   | 0.250273 | 0.255501 | 0.029831 | 0.496566 |
| ASCL2    | 0.167959 | 0.162689 | -0.04599 | 0.697389 |
| ITGA5    | 0.168785 | 0.160571 | -0.07197 | 0.23595  |
| SPDYE6   | 0.636307 | 0.633356 | -0.00671 | 0.709483 |
| EPHB2    | 0.50193  | 0.493885 | -0.02331 | 0.147535 |
| POP1     | 0.079393 | 0.077353 | -0.03757 | 0.317841 |
| C16orf5  | 0.261246 | 0.256811 | -0.0247  | 0.225086 |
| RPS25    | 0.125671 | 0.125256 | -0.00477 | 0.850404 |
| TFDP2    | 0.446372 | 0.462853 | 0.052309 | 0.308904 |
| FLJ10357 | 0.364594 | 0.35658  | -0.03207 | 0.126072 |
| PRDX3    | 0.242565 | 0.23854  | -0.02414 | 0.483389 |
| C12orf52 | 0.0992   | 0.095685 | -0.05205 | 0.336229 |
| SNORD78  | 0.158935 | 0.14186  | -0.16397 | 0.31001  |
| C19orf66 | 0.159904 | 0.169861 | 0.087149 | 0.420452 |
| HOXD1    | 0.12835  | 0.136276 | 0.086446 | 0.285181 |
| C12orf71 | 0.327962 | 0.310539 | -0.07875 | 0.081159 |
| HS6ST3   | 0.273607 | 0.272135 | -0.00778 | 0.839468 |
| LMOD2    | 0.551941 | 0.563974 | 0.031115 | 0.492151 |
| USP44    | 0.385803 | 0.397769 | 0.044064 | 0.401897 |
| DDB2     | 0.087535 | 0.093146 | 0.08964  | 0.305593 |
| MIR600   | 0.531486 | 0.550857 | 0.051647 | 0.082795 |
| USP13    | 0.350209 | 0.348341 | -0.00772 | 0.459031 |
| GALNT5   | 0.237527 | 0.234395 | -0.01915 | 0.861368 |
| ZNF286B  | 0.39271  | 0.390642 | -0.00762 | 0.549567 |

|          |          |          |          |          |
|----------|----------|----------|----------|----------|
| MED16    | 0.582711 | 0.575759 | -0.01732 | 0.344484 |
| NPR2     | 0.470493 | 0.475634 | 0.01568  | 0.432638 |
| OTUD5    | 0.23285  | 0.259195 | 0.154635 | 0.08116  |
| PATE3    | 0.395299 | 0.372316 | -0.08641 | 0.283089 |
| CBS      | 0.466464 | 0.46342  | -0.00944 | 0.493621 |
| CTPS     | 0.284609 | 0.300963 | 0.080605 | 0.08874  |
| STIM2    | 0.207407 | 0.211631 | 0.029089 | 0.225087 |
| GBP4     | 0.189231 | 0.251208 | 0.408736 | 0.054444 |
| LGALS3   | 0.269315 | 0.261884 | -0.04037 | 0.212871 |
| ARFRP1   | 0.18089  | 0.179129 | -0.01412 | 0.803251 |
| WIBG     | 0.184967 | 0.189647 | 0.036051 | 0.130747 |
| ENTPD5   | 0.368844 | 0.372169 | 0.012948 | 0.925794 |
| WWTR1    | 0.297547 | 0.313393 | 0.074852 | 0.241518 |
| SLC26A6  | 0.327402 | 0.321727 | -0.02523 | 0.373755 |
| ATG16L1  | 0.269507 | 0.266356 | -0.01697 | 0.521964 |
| CASK     | 0.250185 | 0.265679 | 0.086691 | 0.131939 |
| SERPINE3 | 0.764063 | 0.759795 | -0.00808 | 0.537208 |
| KCNJ8    | 0.143456 | 0.140527 | -0.02976 | 0.767451 |
| CLCN4    | 0.180245 | 0.179029 | -0.00977 | 0.737403 |
| SEMG2    | 0.254639 | 0.265185 | 0.058544 | 0.60035  |
| SLC37A2  | 0.213004 | 0.215218 | 0.014916 | 0.615005 |
| KCNH1    | 0.432627 | 0.433087 | 0.001534 | 0.835829 |
| SERGEF   | 0.400457 | 0.399785 | -0.00242 | 0.920247 |
| OR4L1    | 0.336144 | 0.317395 | -0.0828  | 0.242455 |
| LEFTY1   | 0.608129 | 0.601314 | -0.01626 | 0.55736  |
| CHAD     | 0.094847 | 0.094442 | -0.00617 | 0.711218 |
| C19orf23 | 0.443982 | 0.469689 | 0.081205 | 0.336229 |
| CR2      | 0.088615 | 0.086451 | -0.03568 | 0.45762  |
| DAK      | 0.554226 | 0.559667 | 0.014093 | 0.300129 |
| ZNF322B  | 0.323164 | 0.321078 | -0.00934 | 0.644776 |
| MMS19    | 0.331155 | 0.325214 | -0.02612 | 0.534145 |
| ZNF788   | 0.422277 | 0.388562 | -0.12004 | 0.250042 |
| LOC14477 | 0.511807 | 0.524531 | 0.035427 | 0.218043 |
| DIAPH1   | 0.296291 | 0.297414 | 0.005459 | 0.636448 |
| PCDHB5   | 0.473498 | 0.491797 | 0.054703 | 0.287286 |
| TMCO1    | 0.085113 | 0.087655 | 0.042467 | 0.355282 |
| FBLL1    | 0.186349 | 0.204585 | 0.134696 | 0.02828  |
| STK33    | 0.143999 | 0.145527 | 0.01523  | 0.879701 |
| NYNRIN   | 0.238623 | 0.231092 | -0.04626 | 0.247178 |
| TMEM8B   | 0.787305 | 0.774339 | -0.02396 | 0.07336  |
| BIN3     | 0.220051 | 0.223183 | 0.020389 | 0.265712 |
| TNFSF9   | 0.241201 | 0.221782 | -0.12109 | 0.028448 |
| ELF4     | 0.322588 | 0.327595 | 0.022219 | 0.857711 |
| SEC63    | 0.094827 | 0.0983   | 0.051896 | 0.104604 |
| P2RY10   | 0.341226 | 0.357731 | 0.068147 | 0.792463 |
| MAN1A2   | 0.266533 | 0.269598 | 0.0165   | 0.500998 |
| TNFRSF1B | 0.442117 | 0.415114 | -0.09092 | 0.002967 |
| ITGB7    | 0.25267  | 0.246618 | -0.03497 | 0.496566 |
| PCBP1    | 0.098157 | 0.111489 | 0.183743 | 0.587455 |
| TUSC4    | 0.225852 | 0.220005 | -0.03784 | 0.173892 |
| CLRN3    | 0.439139 | 0.439446 | 0.001007 | 0.903629 |
| C15orf44 | 0.182458 | 0.17256  | -0.08046 | 0.050479 |
| VIM      | 0.216494 | 0.190603 | -0.18375 | 0.006582 |
| ST8SIA3  | 0.304643 | 0.302399 | -0.01067 | 0.643107 |
| C4orf26  | 0.517913 | 0.536428 | 0.050674 | 0.41911  |
| TGFB3    | 0.507871 | 0.486527 | -0.06194 | 0.050479 |

|          |          |          |          |          |
|----------|----------|----------|----------|----------|
| TMC5     | 0.302452 | 0.29763  | -0.02319 | 0.653152 |
| FZR1     | 0.465697 | 0.462585 | -0.00967 | 0.60035  |
| KCNE1    | 0.380771 | 0.394716 | 0.051891 | 0.246228 |
| GLYATL2  | 0.342131 | 0.355542 | 0.055471 | 0.502483 |
| TIPRL    | 0.077756 | 0.081562 | 0.068939 | 0.127224 |
| MIR301B  | 0.09296  | 0.088831 | -0.06555 | 0.197066 |
| ATP6V1G2 | 0.401847 | 0.414672 | 0.045325 | 0.299046 |
| SP1      | 0.17982  | 0.181953 | 0.017011 | 0.329257 |
| KIAA1614 | 0.482379 | 0.482823 | 0.001326 | 0.740918 |
| ZNF644   | 0.206171 | 0.207743 | 0.010959 | 0.624862 |
| PTER     | 0.458401 | 0.390827 | -0.23008 | 0.101654 |
| PRR20E   | 0.306465 | 0.332599 | 0.118062 | 0.214586 |
| C3orf77  | 0.734676 | 0.726115 | -0.01691 | 0.152807 |
| IPO9     | 0.291823 | 0.297974 | 0.030091 | 0.226872 |
| EMR1     | 0.243224 | 0.247091 | 0.022757 | 0.929495 |
| C1orf58  | 0.052253 | 0.047725 | -0.13078 | 0.066876 |
| BREA2    | 0.498039 | 0.512424 | 0.041078 | 0.061845 |
| OLFML2B  | 0.323301 | 0.33737  | 0.061455 | 0.00726  |
| AVPR1A   | 0.113908 | 0.124534 | 0.128675 | 0.019765 |
| C2orf56  | 0.224651 | 0.227939 | 0.020961 | 0.549568 |
| MIRLET7D | 0.570191 | 0.588945 | 0.046686 | 0.250043 |
| NAALADL1 | 0.549141 | 0.536885 | -0.03256 | 0.217176 |
| FAT3     | 0.661214 | 0.652313 | -0.01955 | 0.199499 |
| TBX18    | 0.084694 | 0.089201 | 0.074802 | 0.138016 |
| TFAP2D   | 0.25468  | 0.300417 | 0.23828  | 0.060239 |
| GUCY2G   | 0.22562  | 0.220392 | -0.03383 | 0.278933 |
| PIGB     | 0.15124  | 0.157627 | 0.059683 | 0.068986 |
| GRIN2B   | 0.479785 | 0.435813 | -0.13868 | 0.015159 |
| SPINK1   | 0.295098 | 0.297137 | 0.009933 | 0.787084 |
| WBP2     | 0.139605 | 0.14384  | 0.043114 | 0.121523 |
| GRIN2D   | 0.298013 | 0.272191 | -0.13076 | 0.026172 |
| HECA     | 0.3774   | 0.400131 | 0.084377 | 0.022497 |
| SAA4     | 0.225159 | 0.238689 | 0.084187 | 0.365063 |
| SNORA59E | 0.253145 | 0.25614  | 0.016969 | 0.396689 |
| MIR1248  | 0.091884 | 0.077269 | -0.24993 | 0.610102 |
| SEC23A   | 0.204573 | 0.205437 | 0.006082 | 0.509929 |
| TCEA2    | 0.43851  | 0.434514 | -0.01321 | 0.830379 |
| LAMB2L   | 0.131483 | 0.126568 | -0.05496 | 0.534144 |
| ITPR3    | 0.406885 | 0.396629 | -0.03683 | 0.183669 |
| TMEM71   | 0.328715 | 0.329701 | 0.004318 | 0.909164 |
| OOEP     | 0.767849 | 0.766793 | -0.00199 | 0.633123 |
| SMPD4    | 0.147521 | 0.146841 | -0.00666 | 0.479042 |
| SNAP29   | 0.179485 | 0.187206 | 0.06076  | 0.021685 |
| RPRML    | 0.025595 | 0.024498 | -0.06318 | 0.133639 |
| ZC3H13   | 0.383939 | 0.389184 | 0.019576 | 0.760346 |
| MOGS     | 0.118465 | 0.121514 | 0.036657 | 0.217173 |
| ZNF273   | 0.230302 | 0.231768 | 0.009154 | 0.531086 |
| OR5D14   | 0.1247   | 0.116299 | -0.10063 | 0.387671 |
| UNC5D    | 0.452107 | 0.454694 | 0.008234 | 0.429913 |
| RIN1     | 0.445924 | 0.430927 | -0.04935 | 0.466125 |
| LOC15368 | 0.166035 | 0.16412  | -0.01674 | 0.828564 |
| MAGEB3   | 0.507169 | 0.528917 | 0.060575 | 0.311122 |
| SNORD71  | 0.582059 | 0.605247 | 0.056357 | 0.262723 |
| PCDHGA2  | 0.461563 | 0.4687   | 0.022137 | 0.387671 |
| WNT9A    | 0.445573 | 0.431261 | -0.0471  | 0.088739 |
| OR5P3    | 0.57898  | 0.614315 | 0.085465 | 0.361375 |

|          |          |          |          |          |
|----------|----------|----------|----------|----------|
| XPR1     | 0.378693 | 0.384884 | 0.023394 | 0.373755 |
| MIR431   | 0.850927 | 0.843957 | -0.01187 | 0.763887 |
| CIAO1    | 0.220482 | 0.218289 | -0.01442 | 0.531085 |
| C6orf132 | 0.442365 | 0.428827 | -0.04484 | 0.109681 |
| C9orf173 | 0.53361  | 0.518822 | -0.04055 | 0.416434 |
| KCNK2    | 0.244696 | 0.231028 | -0.08293 | 0.295808 |
| ZNF581   | 0.175852 | 0.172435 | -0.02831 | 0.629816 |
| RMI1     | 0.23009  | 0.229378 | -0.00447 | 0.506944 |
| FBXO32   | 0.338728 | 0.331172 | -0.03255 | 0.193055 |
| STX17    | 0.342648 | 0.34205  | -0.00252 | 0.968425 |
| C12orf47 | 0.088896 | 0.091354 | 0.03934  | 0.210313 |
| GAA      | 0.417429 | 0.41103  | -0.02229 | 0.134952 |
| LOC14869 | 0.75267  | 0.774732 | 0.04168  | 0.017996 |
| ODZ2     | 0.61174  | 0.603454 | -0.01968 | 0.076403 |
| SCARNA3  | 0.85341  | 0.870477 | 0.028567 | 0.020512 |
| IARS     | 0.130249 | 0.122662 | -0.08658 | 0.169512 |
| LETM1    | 0.573382 | 0.558882 | -0.03695 | 0.004912 |
| FFAR3    | 0.17466  | 0.166367 | -0.07018 | 0.358932 |
| ANKRD5   | 0.128899 | 0.125864 | -0.03437 | 0.649796 |
| SRR      | 0.145233 | 0.145875 | 0.006355 | 0.605216 |
| PDE6C    | 0.666694 | 0.698568 | 0.067375 | 0.383845 |
| ITGA4    | 0.313423 | 0.316228 | 0.012852 | 0.666643 |
| SNORD116 | 0.611753 | 0.62207  | 0.02413  | 0.201961 |
| LYPLA1   | 0.19521  | 0.199274 | 0.029726 | 0.236868 |
| EDAR     | 0.50086  | 0.541167 | 0.111667 | 0.194654 |
| UEVLD    | 0.045991 | 0.047592 | 0.049394 | 0.194643 |
| STOM     | 0.329026 | 0.339184 | 0.043867 | 0.314471 |
| NEURL    | 0.351895 | 0.363147 | 0.045407 | 0.062171 |
| SRP54    | 0.050471 | 0.051234 | 0.021633 | 0.348046 |
| LRAT     | 0.125668 | 0.125517 | -0.00174 | 0.76923  |
| EEFSEC   | 0.480116 | 0.47051  | -0.02916 | 0.138018 |
| NFAT5    | 0.334699 | 0.343918 | 0.039201 | 0.197877 |
| LHFPL5   | 0.161972 | 0.167051 | 0.044547 | 0.147537 |
| OR1F2P   | 0.173428 | 0.165997 | -0.06318 | 0.087438 |
| ZC4H2    | 0.15029  | 0.157011 | 0.063121 | 0.505455 |
| MIR921   | 0.587372 | 0.613426 | 0.062616 | 0.03759  |
| ARMC2    | 0.338746 | 0.32459  | -0.06159 | 0.141766 |
| SIRT1    | 0.233287 | 0.240199 | 0.042127 | 0.43264  |
| HRC      | 0.381671 | 0.378958 | -0.01029 | 0.830379 |
| SGK269   | 0.562459 | 0.566127 | 0.009377 | 0.718168 |
| PGLYRP1  | 0.349437 | 0.346934 | -0.01037 | 0.73916  |
| SPATS2   | 0.312134 | 0.337955 | 0.114664 | 0.032557 |
| C6orf204 | 0.278883 | 0.281601 | 0.013995 | 0.528038 |
| NSUN4    | 0.147162 | 0.148328 | 0.011386 | 0.496565 |
| CLNK     | 0.403812 | 0.419356 | 0.05449  | 0.685369 |
| TFPT     | 0.025245 | 0.027214 | 0.108344 | 0.331528 |
| CLIC2    | 0.333629 | 0.352827 | 0.080716 | 0.687082 |
| ACCN1    | 0.381402 | 0.369263 | -0.04666 | 0.0194   |
| FFAR2    | 0.223053 | 0.220846 | -0.01434 | 0.742678 |
| ZNF674   | 0.101251 | 0.116344 | 0.200456 | 0.169507 |
| C9orf57  | 0.804144 | 0.887333 | 0.142022 | 0.048049 |
| CLDN9    | 0.330078 | 0.315416 | -0.06555 | 0.403208 |
| THBD     | 0.099128 | 0.110924 | 0.162211 | 0.103614 |
| LOC64383 | 0.473043 | 0.467995 | -0.01548 | 0.751496 |
| BARHL2   | 0.100451 | 0.100505 | 0.000776 | 0.541828 |
| GRID1    | 0.334994 | 0.332053 | -0.01272 | 0.633129 |

|           |          |          |          |          |
|-----------|----------|----------|----------|----------|
| RORB      | 0.234861 | 0.241904 | 0.042631 | 0.481938 |
| OSR1      | 0.209578 | 0.188271 | -0.15467 | 0.134346 |
| POMGNT1   | 0.224748 | 0.220303 | -0.02882 | 0.643108 |
| PLP1      | 0.740039 | 0.699922 | -0.08041 | 0.152814 |
| RPE65     | 0.490063 | 0.528219 | 0.10817  | 0.030176 |
| C8orf4    | 0.838004 | 0.822753 | -0.0265  | 0.511421 |
| RBM38     | 0.468314 | 0.456878 | -0.03567 | 0.218916 |
| GALNT9    | 0.392351 | 0.382359 | -0.03722 | 0.555799 |
| KIF17     | 0.284006 | 0.278283 | -0.02937 | 0.362601 |
| PRELP     | 0.436202 | 0.420003 | -0.0546  | 0.005279 |
| IRS2      | 0.310285 | 0.298081 | -0.05789 | 0.33623  |
| DNAJA4    | 0.511933 | 0.513788 | 0.005216 | 0.817692 |
| C1orf38   | 0.302717 | 0.292959 | -0.04727 | 0.050754 |
| HRH3      | 0.249952 | 0.244347 | -0.03272 | 0.554238 |
| MIB1      | 0.277682 | 0.287284 | 0.049044 | 0.1374   |
| TCN1      | 0.319491 | 0.361438 | 0.177971 | 0.302309 |
| CD164     | 0.071507 | 0.067869 | -0.07534 | 0.156182 |
| MFSD7     | 0.499309 | 0.524897 | 0.072102 | 0.317845 |
| PCDHAC1   | 0.437309 | 0.455218 | 0.057904 | 0.245282 |
| ACR       | 0.581819 | 0.553222 | -0.07271 | 0.096878 |
| MMP9      | 0.160528 | 0.144213 | -0.15462 | 0.01766  |
| MRAP2     | 0.14891  | 0.15091  | 0.019247 | 0.291527 |
| RAD9A     | 0.356056 | 0.349507 | -0.02678 | 0.203613 |
| SHPK      | 0.49791  | 0.494849 | -0.0089  | 0.610102 |
| PSG2      | 0.444358 | 0.465088 | 0.065783 | 0.235949 |
| MRPL49    | 0.210173 | 0.20895  | -0.00842 | 0.986996 |
| LOC151117 | 0.133867 | 0.103014 | -0.37797 | 0.053572 |
| CCDC48    | 0.1917   | 0.184332 | -0.05655 | 0.136786 |
| CTNNA3    | 0.269219 | 0.271704 | 0.013257 | 0.73916  |
| CD33      | 0.142108 | 0.141371 | -0.00749 | 0.566784 |
| RBAK      | 0.127791 | 0.132787 | 0.055334 | 0.16879  |
| C14orf159 | 0.262634 | 0.255991 | -0.03696 | 0.399287 |
| CDKL4     | 0.491715 | 0.488116 | -0.0106  | 0.66495  |
| TMEM132C  | 0.448888 | 0.44991  | 0.003281 | 0.812269 |
| ZSWIM2    | 0.077382 | 0.071989 | -0.10423 | 0.127226 |
| MSR1      | 0.492978 | 0.516921 | 0.068422 | 0.357714 |
| FUT2      | 0.44308  | 0.428967 | -0.0467  | 0.10263  |
| LAT       | 0.563456 | 0.554138 | -0.02406 | 0.486303 |
| ACADM     | 0.043521 | 0.043647 | 0.004151 | 0.601964 |
| RC3H1     | 0.809537 | 0.844272 | 0.060611 | 0.005753 |
| C5orf45   | 0.279763 | 0.28015  | 0.001991 | 0.742677 |
| PHKB      | 0.248859 | 0.248471 | -0.00226 | 0.933197 |
| SNHG3.RC  | 0.286326 | 0.280814 | -0.02804 | 0.48339  |
| SLC35B2   | 0.143427 | 0.145249 | 0.018214 | 0.148841 |
| OPHN1     | 0.295663 | 0.297971 | 0.011219 | 0.693946 |
| TNFSF12   | 0.185433 | 0.198378 | 0.097355 | 0.117652 |
| IL1F7     | 0.496967 | 0.541799 | 0.124608 | 0.254869 |
| OR5B3     | 0.181567 | 0.208194 | 0.197424 | 0.064827 |
| ADCYAP1   | 0.074856 | 0.074517 | -0.00655 | 0.132534 |
| MGP       | 0.220859 | 0.204318 | -0.11231 | 0.427199 |
| PPBPL1    | 0.37066  | 0.342745 | -0.11296 | 0.311124 |
| BCL6      | 0.205626 | 0.195514 | -0.07275 | 0.123781 |
| TMPRSS5   | 0.730257 | 0.739761 | 0.018655 | 0.134949 |
| WASF1     | 0.132522 | 0.131833 | -0.00752 | 0.746201 |
| CILP2     | 0.361106 | 0.372672 | 0.045485 | 0.318973 |
| B4GALT1   | 0.312218 | 0.31262  | 0.001855 | 0.887053 |

|          |          |          |          |          |
|----------|----------|----------|----------|----------|
| CCDC13   | 0.342041 | 0.332272 | -0.0418  | 0.213726 |
| SCN10A   | 0.464044 | 0.446812 | -0.05459 | 0.15755  |
| MAP3K13  | 0.366746 | 0.358743 | -0.03183 | 0.13194  |
| AKR1B15  | 0.145628 | 0.146928 | 0.012822 | 0.876029 |
| DGKA     | 0.347218 | 0.321255 | -0.11212 | 0.018339 |
| LOC73227 | 0.321304 | 0.321603 | 0.001341 | 0.83583  |
| CD86     | 0.304238 | 0.305247 | 0.004778 | 0.839469 |
| PIM2     | 0.228168 | 0.242676 | 0.088933 | 0.421796 |
| NFE2     | 0.525075 | 0.505968 | -0.05348 | 0.008927 |
| DEFB104B | 0.470623 | 0.47562  | 0.015237 | 0.742678 |
| USP14    | 0.173122 | 0.176372 | 0.026835 | 0.239651 |
| FAM193A  | 0.708278 | 0.701287 | -0.01431 | 0.352861 |
| OR4K1    | 0.370253 | 0.333408 | -0.15122 | 0.047536 |
| BTN2A2   | 0.251775 | 0.252984 | 0.00691  | 0.781715 |
| SYNRG    | 0.260879 | 0.258034 | -0.01582 | 0.346865 |
| COL25A1  | 0.190458 | 0.188145 | -0.01763 | 0.979566 |
| DIO2     | 0.628787 | 0.619369 | -0.02177 | 0.503968 |
| COBL     | 0.388351 | 0.39787  | 0.034934 | 0.500999 |
| EXOC2    | 0.587625 | 0.59293  | 0.012965 | 0.72689  |
| PIH1D1   | 0.303528 | 0.304852 | 0.006279 | 0.577873 |
| CRTAC1   | 0.460038 | 0.432053 | -0.09055 | 0.008111 |
| SV2C     | 0.221852 | 0.235908 | 0.088627 | 0.045486 |
| NDP      | 0.35527  | 0.335694 | -0.08177 | 0.457622 |
| INPP1    | 0.329591 | 0.338934 | 0.04033  | 0.27687  |
| PDE4DIP  | 0.258179 | 0.254912 | -0.01837 | 0.528038 |
| C11orf21 | 0.648439 | 0.629862 | -0.04194 | 0.46755  |
| PDE8A    | 0.426249 | 0.432705 | 0.021688 | 0.231378 |
| MDFI     | 0.245774 | 0.225265 | -0.12571 | 0.090499 |
| LOC10029 | 0.131275 | 0.129664 | -0.01781 | 0.511424 |
| SCD5     | 0.417778 | 0.414808 | -0.01029 | 0.781716 |
| SYT14L   | 0.66852  | 0.701595 | 0.069667 | 0.160304 |
| MSRA     | 0.405803 | 0.402753 | -0.01088 | 0.331568 |
| LOC28490 | 0.023352 | 0.023127 | -0.01398 | 0.83398  |
| CDC7     | 0.070149 | 0.075258 | 0.101416 | 0.107114 |
| PARVG    | 0.591513 | 0.555964 | -0.08942 | 0.009174 |
| OSMR     | 0.250365 | 0.265172 | 0.082897 | 0.16879  |
| FGF9     | 0.157156 | 0.154785 | -0.02193 | 0.483391 |
| AK2      | 0.102123 | 0.102206 | 0.001173 | 0.358928 |
| GLRA3    | 0.092594 | 0.086507 | -0.0981  | 0.176112 |
| CNP      | 0.27176  | 0.298421 | 0.135017 | 0.005129 |
| TJAP1    | 0.467741 | 0.478664 | 0.033306 | 0.251003 |
| RPL34    | 0.131644 | 0.133719 | 0.022559 | 0.370014 |
| GON4L    | 0.181277 | 0.176542 | -0.03819 | 0.326953 |
| KLF4     | 0.124804 | 0.115177 | -0.11582 | 0.080754 |
| ARSB     | 0.391493 | 0.389646 | -0.00682 | 0.651472 |
| MINK1    | 0.495454 | 0.491351 | -0.012   | 0.434004 |
| TBL1Y    | 0.251975 | 0.235811 | -0.09565 | 0.380043 |
| CAPN11   | 0.371543 | 0.361532 | -0.03941 | 0.133138 |
| SLCO1A2  | 0.352085 | 0.357133 | 0.020536 | 0.656515 |
| ZNF318   | 0.296881 | 0.296438 | -0.00216 | 0.946164 |
| EIF3C    | 0.509114 | 0.502834 | -0.01791 | 0.230471 |
| TSPAN16  | 0.368647 | 0.341032 | -0.11233 | 0.048589 |
| XRR1     | 0.119404 | 0.121819 | 0.028881 | 0.279965 |
| LTBR     | 0.622012 | 0.630727 | 0.020074 | 0.49804  |
| EXOSC6   | 0.067914 | 0.067306 | -0.01298 | 0.877864 |
| MAP7D1   | 0.587827 | 0.591999 | 0.010202 | 0.486302 |

|          |          |          |          |          |
|----------|----------|----------|----------|----------|
| ZNF280D  | 0.301736 | 0.329252 | 0.125906 | 0.012807 |
| PHLDA3   | 0.211912 | 0.208957 | -0.02026 | 0.498041 |
| PARP6    | 0.326248 | 0.321062 | -0.02312 | 0.584254 |
| CCDC148  | 0.245965 | 0.24117  | -0.0284  | 0.505455 |
| C5orf62  | 0.469106 | 0.452328 | -0.05254 | 0.090499 |
| GLIPR1L1 | 0.150309 | 0.11745  | -0.35589 | 0.076792 |
| FNIP2    | 0.322656 | 0.325826 | 0.014108 | 0.653152 |
| SMARCE1  | 0.219885 | 0.227183 | 0.047104 | 0.413769 |
| MFSD4    | 0.297853 | 0.290251 | -0.0373  | 0.189103 |
| FOXD1    | 0.063463 | 0.062629 | -0.01908 | 0.676828 |
| CHGA     | 0.300897 | 0.308205 | 0.03462  | 0.352867 |
| RBP5     | 0.794794 | 0.783588 | -0.02049 | 0.222422 |
| RPAIN    | 0.08381  | 0.084171 | 0.006204 | 0.53721  |
| ABHD14B  | 0.124934 | 0.128158 | 0.036759 | 0.407149 |
| KCNH3    | 0.3486   | 0.339611 | -0.03769 | 0.377519 |
| SLC5A6   | 0.228858 | 0.225674 | -0.02021 | 0.626511 |
| COX6C    | 0.215539 | 0.215893 | 0.002371 | 0.779928 |
| MIR2114  | 0.603854 | 0.579418 | -0.05959 | 0.138638 |
| FUBP1    | 0.127696 | 0.120569 | -0.08286 | 0.150818 |
| SMR3A    | 0.556565 | 0.652699 | 0.229868 | 0.013319 |
| TGM2     | 0.317368 | 0.30438  | -0.06028 | 0.066534 |
| POU5F1   | 0.547289 | 0.537022 | -0.02732 | 0.07006  |
| MMP19    | 0.341819 | 0.324289 | -0.07595 | 0.243395 |
| C18orf1  | 0.453385 | 0.435771 | -0.05717 | 0.270745 |
| THRA     | 0.446142 | 0.438374 | -0.02534 | 0.265712 |
| MTF2     | 0.087589 | 0.088281 | 0.011352 | 0.783503 |
| FAM169A  | 0.338875 | 0.347655 | 0.036905 | 0.304494 |
| LCN9     | 0.138844 | 0.143169 | 0.044256 | 0.692227 |
| FLJ45340 | 0.378425 | 0.3837   | 0.01997  | 0.378778 |
| B3GALNT2 | 0.064531 | 0.062252 | -0.05187 | 0.538741 |
| LRFN5    | 0.080338 | 0.081188 | 0.015184 | 0.634785 |
| DSCC1    | 0.09686  | 0.10023  | 0.049342 | 0.367531 |
| DTX3     | 0.361824 | 0.354431 | -0.02979 | 0.242451 |
| SMCR8    | 0.274635 | 0.273095 | -0.00811 | 0.687081 |
| GRHL1    | 0.294166 | 0.300999 | 0.033127 | 0.07042  |
| C21orf91 | 0.154346 | 0.156023 | 0.01559  | 0.753263 |
| FAM171B  | 0.302407 | 0.308691 | 0.029671 | 0.267716 |
| OR51B4   | 0.311185 | 0.321783 | 0.048316 | 0.649797 |
| COX15    | 0.07637  | 0.083997 | 0.137327 | 0.00247  |
| XRCC5    | 0.210449 | 0.205359 | -0.03532 | 0.528038 |
| FAM19A3  | 0.528549 | 0.502611 | -0.07259 | 0.041612 |
| C22orf13 | 0.084806 | 0.084919 | 0.001926 | 0.95729  |
| KIAA1949 | 0.239041 | 0.25597  | 0.098716 | 0.144951 |
| PALM2.AK | 0.366754 | 0.414346 | 0.176022 | 0.036534 |
| NPR1     | 0.306735 | 0.299903 | -0.03249 | 0.232286 |
| FBLN5    | 0.131274 | 0.139737 | 0.090127 | 0.091837 |
| RRH      | 0.282513 | 0.299554 | 0.0845   | 0.069342 |
| DEF6     | 0.369955 | 0.352736 | -0.06876 | 0.256818 |
| GPC3     | 0.323009 | 0.329047 | 0.026718 | 0.711218 |
| VWDE     | 0.204986 | 0.225393 | 0.136913 | 0.01264  |
| INTS4L2  | 0.399805 | 0.40833  | 0.030437 | 0.471842 |
| PRKCQ    | 0.354389 | 0.333034 | -0.08966 | 0.16879  |
| UBE2QL1  | 0.361294 | 0.37539  | 0.055216 | 0.117106 |
| PIGK     | 0.099841 | 0.099813 | -0.00041 | 0.953581 |
| SLC25A25 | 0.696247 | 0.693135 | -0.00646 | 0.785294 |
| RSPH9    | 0.529104 | 0.528436 | -0.00182 | 0.865029 |

|          |          |          |          |          |
|----------|----------|----------|----------|----------|
| ACYP2    | 0.277924 | 0.274183 | -0.01955 | 0.749729 |
| GRB10    | 0.376443 | 0.383607 | 0.027198 | 0.37752  |
| MAFG     | 0.654824 | 0.680808 | 0.056142 | 0.021552 |
| MB       | 0.49867  | 0.483381 | -0.04492 | 0.041148 |
| UPP1     | 0.330424 | 0.32561  | -0.02117 | 0.568362 |
| PRSS1    | 0.718552 | 0.669844 | -0.10127 | 0.038019 |
| AKAP1    | 0.352344 | 0.344563 | -0.03222 | 0.161696 |
| C7orf38  | 0.049897 | 0.048061 | -0.0541  | 0.459017 |
| TFAP2E   | 0.368843 | 0.35982  | -0.03573 | 0.498043 |
| MIR485   | 0.849459 | 0.840094 | -0.01599 | 0.50992  |
| NAT8B    | 0.326117 | 0.326575 | 0.002022 | 0.576282 |
| CHRNA1   | 0.10244  | 0.101015 | -0.02021 | 0.385116 |
| USP26    | 0.561185 | 0.607222 | 0.113747 | 0.148844 |
| LOC44117 | 0.069038 | 0.066614 | -0.05157 | 0.105599 |
| BTBD9    | 0.381496 | 0.374806 | -0.02552 | 0.087006 |
| CCDC39   | 0.130437 | 0.136823 | 0.068955 | 0.079949 |
| C1orf115 | 0.163308 | 0.170436 | 0.061634 | 0.355285 |
| C16orf72 | 0.19017  | 0.192052 | 0.014207 | 0.387669 |
| ANO5     | 0.213185 | 0.219718 | 0.043547 | 0.590669 |
| TREML2   | 0.52987  | 0.525983 | -0.01062 | 0.799651 |
| KLK1     | 0.474808 | 0.43671  | -0.12067 | 0.23503  |
| ZNF98    | 0.129005 | 0.136268 | 0.079026 | 0.250043 |
| SLC27A6  | 0.136952 | 0.153473 | 0.164314 | 0.087438 |
| GOLGA8C  | 0.52198  | 0.501227 | -0.05853 | 0.345674 |
| ATP9A    | 0.470686 | 0.464624 | -0.0187  | 0.54337  |
| RBM46    | 0.5387   | 0.578882 | 0.103788 | 0.139259 |
| SEMA4C   | 0.436357 | 0.43673  | 0.001234 | 0.944311 |
| CARHSP1  | 0.142875 | 0.14235  | -0.00531 | 0.670029 |
| SNAP47   | 0.400489 | 0.403881 | 0.012166 | 0.646448 |
| SNX4     | 0.219097 | 0.219917 | 0.005391 | 0.565208 |
| CCNJ     | 0.085857 | 0.088919 | 0.050562 | 0.247172 |
| CCL28    | 0.200758 | 0.212616 | 0.082795 | 0.246228 |
| MFSD6L   | 0.22084  | 0.20419  | -0.11309 | 0.294733 |
| ATAD3A   | 0.5812   | 0.578258 | -0.00732 | 0.634784 |
| EMX2OS   | 0.152108 | 0.133166 | -0.19186 | 0.111762 |
| C22orf23 | 0.119793 | 0.117832 | -0.02382 | 0.328099 |
| FRMPD1   | 0.321868 | 0.311967 | -0.04508 | 0.253898 |
| DHX33    | 0.305526 | 0.311695 | 0.02884  | 0.171691 |
| SVIL     | 0.467571 | 0.465535 | -0.0063  | 0.263718 |
| SOST     | 0.411961 | 0.402649 | -0.03298 | 0.74973  |
| LOC72864 | 0.681689 | 0.629341 | -0.11527 | 0.000658 |
| MED12L   | 0.539875 | 0.562094 | 0.058186 | 0.139257 |
| GLI2     | 0.665019 | 0.641351 | -0.05228 | 0.001779 |
| POLK     | 0.139281 | 0.141723 | 0.025077 | 0.548016 |
| ZBTB8B   | 0.148459 | 0.155047 | 0.062637 | 0.193056 |
| RPS26    | 0.139498 | 0.1402   | 0.007237 | 0.611735 |
| ANGPTL1  | 0.594085 | 0.57588  | -0.0449  | 0.323517 |
| DNLZ     | 0.211872 | 0.1967   | -0.1072  | 0.135561 |
| PCDH8    | 0.105888 | 0.096731 | -0.13048 | 0.165924 |
| DACT1    | 0.410932 | 0.402049 | -0.03153 | 0.508435 |
| PTPLB    | 0.238502 | 0.242632 | 0.024767 | 0.429914 |
| PCDHGB4  | 0.558973 | 0.568877 | 0.025338 | 0.680243 |
| SYCN     | 0.360777 | 0.335138 | -0.10635 | 0.33506  |
| ACTR3B   | 0.434676 | 0.428315 | -0.02127 | 0.079547 |
| FCGR2C   | 0.181591 | 0.166895 | -0.12175 | 0.313354 |
| OR10C1   | 0.421338 | 0.422058 | 0.002463 | 0.972138 |

|           |          |          |          |          |
|-----------|----------|----------|----------|----------|
| RXFP4     | 0.523404 | 0.507183 | -0.04542 | 0.226871 |
| SERPINB4  | 0.216095 | 0.212434 | -0.02465 | 0.876029 |
| NEK9      | 0.147243 | 0.155886 | 0.082291 | 0.758574 |
| HIST3H3   | 0.81466  | 0.800191 | -0.02585 | 0.003973 |
| MCHR1     | 0.410341 | 0.394821 | -0.05562 | 0.133138 |
| GRAP2     | 0.451437 | 0.346596 | -0.38127 | 3.69E-05 |
| KPNA2     | 0.084198 | 0.085404 | 0.020523 | 0.587454 |
| LDB1      | 0.141741 | 0.140385 | -0.01387 | 0.830379 |
| SLC5A9    | 0.594239 | 0.586252 | -0.01952 | 0.400588 |
| FAM173B   | 0.251308 | 0.251976 | 0.003827 | 0.700837 |
| CAMSAP1   | 0.237228 | 0.23829  | 0.00644  | 0.861368 |
| SSFA2     | 0.379036 | 0.371592 | -0.02861 | 0.271757 |
| PPID      | 0.091743 | 0.092997 | 0.019586 | 0.378776 |
| LOC100131 | 0.286763 | 0.300153 | 0.06584  | 0.67173  |
| LRRCC1    | 0.06595  | 0.068195 | 0.048282 | 0.206938 |
| CSHL1     | 0.504823 | 0.471147 | -0.0996  | 0.0194   |
| PGAM4     | 0.86686  | 0.867298 | 0.000728 | 0.885209 |
| MIR23B    | 0.406192 | 0.38049  | -0.0943  | 0.007517 |
| AANAT     | 0.258106 | 0.244398 | -0.07873 | 0.012475 |
| TMPRSS4   | 0.502753 | 0.471489 | -0.09263 | 0.064155 |
| IGF1R     | 0.573128 | 0.57832  | 0.013011 | 0.449205 |
| SCN1B     | 0.339158 | 0.344372 | 0.022012 | 0.700836 |
| FAM65C    | 0.417562 | 0.414001 | -0.01236 | 0.446417 |
| ANP32A    | 0.216302 | 0.21145  | -0.03273 | 0.257793 |
| GUCY1B2   | 0.609796 | 0.611625 | 0.004321 | 0.914703 |
| FAM180B   | 0.60814  | 0.60802  | -0.00028 | 0.914703 |
| DLX6AS    | 0.307687 | 0.343745 | 0.159879 | 0.223312 |
| CARTPT    | 0.152638 | 0.140309 | -0.12151 | 0.326954 |
| PRDM12    | 0.140606 | 0.138762 | -0.01905 | 0.821311 |
| PLA2G4F   | 0.560331 | 0.550512 | -0.02551 | 0.079148 |
| FGL1      | 0.360361 | 0.351255 | -0.03692 | 0.238722 |
| APAF1     | 0.104059 | 0.106966 | 0.039757 | 0.250998 |
| CCDC42B   | 0.159373 | 0.157636 | -0.01581 | 0.349258 |
| CHD1L     | 0.241868 | 0.241351 | -0.00309 | 0.824935 |
| MSI1      | 0.179201 | 0.18208  | 0.022991 | 0.423142 |
| TSGA10IP  | 0.373684 | 0.397489 | 0.089096 | 0.311123 |
| PPIG      | 0.16993  | 0.166384 | -0.03042 | 0.355284 |
| PAK1IP1   | 0.806338 | 0.821447 | 0.026783 | 0.420446 |
| MIR497    | 0.811311 | 0.819788 | 0.014996 | 0.342107 |
| POLE3     | 0.204855 | 0.200227 | -0.03297 | 0.416433 |
| FLJ42289  | 0.201758 | 0.20107  | -0.00493 | 0.73916  |
| SNORD115  | 0.37875  | 0.382135 | 0.012836 | 0.666643 |
| KARS      | 0.233732 | 0.231358 | -0.01473 | 0.725143 |
| FAM47C    | 0.391102 | 0.42803  | 0.130167 | 0.069701 |
| SLC13A5   | 0.149672 | 0.145985 | -0.03598 | 0.512925 |
| DNM1L     | 0.325292 | 0.326948 | 0.007326 | 0.654832 |
| TECRL     | 0.830337 | 0.886952 | 0.09516  | 0.001528 |
| FAM170A   | 0.638676 | 0.662666 | 0.053198 | 0.201959 |
| TBC1D12   | 0.143105 | 0.146435 | 0.033182 | 0.156185 |
| MED27     | 0.564037 | 0.558992 | -0.01296 | 0.210313 |
| ADM2      | 0.18096  | 0.155066 | -0.22279 | 0.179863 |
| GORASP1   | 0.138208 | 0.139758 | 0.016084 | 0.404518 |
| SNORD38   | 0.426956 | 0.396985 | -0.105   | 0.19626  |
| DEGS1     | 0.187589 | 0.193031 | 0.041257 | 0.383845 |
| GGT5      | 0.389292 | 0.361161 | -0.10821 | 0.000442 |
| MORF4L2   | 0.221238 | 0.224352 | 0.020169 | 0.832195 |

|           |          |          |          |          |
|-----------|----------|----------|----------|----------|
| MFN2      | 0.315793 | 0.316623 | 0.003786 | 0.584252 |
| NUDT1     | 0.274907 | 0.273649 | -0.00662 | 0.661569 |
| DTNB      | 0.336067 | 0.333678 | -0.01029 | 0.680242 |
| PTGIR     | 0.644328 | 0.658985 | 0.03245  | 0.182902 |
| ARL2      | 0.209581 | 0.208126 | -0.01005 | 0.848579 |
| CCNK      | 0.562581 | 0.547425 | -0.0394  | 0.38767  |
| LIAS      | 0.168405 | 0.166555 | -0.01594 | 0.839468 |
| EIF1AX    | 0.183748 | 0.185262 | 0.011833 | 0.649796 |
| RSRC1     | 0.125021 | 0.130253 | 0.059147 | 0.028279 |
| GPRC5B    | 0.361454 | 0.366247 | 0.019006 | 0.543372 |
| C21orf57  | 0.340334 | 0.371687 | 0.127135 | 0.072248 |
| ANKRD57   | 0.709291 | 0.737325 | 0.055924 | 0.723397 |
| SGK1      | 0.356694 | 0.337726 | -0.07883 | 0.053285 |
| SLC44A1   | 0.252576 | 0.258946 | 0.035936 | 0.167353 |
| EAPP      | 0.254979 | 0.26059  | 0.031399 | 0.302309 |
| C6orf15   | 0.388757 | 0.380758 | -0.02999 | 0.543372 |
| GNAS      | 0.445592 | 0.456642 | 0.035338 | 0.338574 |
| OR7D4     | 0.186232 | 0.179357 | -0.05427 | 0.317845 |
| CMPK1     | 0.072462 | 0.078379 | 0.113231 | 0.127226 |
| P2RY6     | 0.542154 | 0.530655 | -0.03093 | 0.191467 |
| TFF3      | 0.650507 | 0.634406 | -0.03616 | 0.225977 |
| BAX       | 0.119227 | 0.119314 | 0.001044 | 0.901784 |
| CCNA1     | 0.156405 | 0.143221 | -0.12704 | 0.435376 |
| ACAN      | 0.426962 | 0.411708 | -0.05249 | 0.307798 |
| MPZL1     | 0.135177 | 0.136565 | 0.014736 | 0.440878 |
| GTPBP5    | 0.426285 | 0.42205  | -0.01441 | 0.565207 |
| ZNF648    | 0.555892 | 0.606461 | 0.125609 | 0.076405 |
| PRKCA     | 0.534964 | 0.523671 | -0.03078 | 0.031622 |
| CYP51A1   | 0.138305 | 0.142805 | 0.046192 | 0.047015 |
| KIF9      | 0.184709 | 0.18659  | 0.014621 | 0.767451 |
| HMOX1     | 0.158325 | 0.151089 | -0.06749 | 0.240583 |
| THOC7     | 0.25355  | 0.255681 | 0.012073 | 0.373753 |
| TAOK3     | 0.224705 | 0.230935 | 0.039453 | 0.242454 |
| SCN11A    | 0.616505 | 0.618665 | 0.005046 | 0.541826 |
| UBE2U     | 0.696264 | 0.695959 | -0.00063 | 0.874193 |
| EFNB2     | 0.452656 | 0.477276 | 0.076407 | 0.005753 |
| MIR564    | 0.078074 | 0.091867 | 0.234705 | 0.239646 |
| ZNF141    | 0.077309 | 0.075736 | -0.02965 | 0.498037 |
| MEAF6     | 0.128088 | 0.132682 | 0.050844 | 0.228665 |
| SLC12A4   | 0.560532 | 0.570207 | 0.024688 | 0.095945 |
| KHDRBS3   | 0.134852 | 0.137619 | 0.029295 | 0.19226  |
| ZBTB34    | 0.564853 | 0.565795 | 0.002402 | 0.817692 |
| ATP5B     | 0.241752 | 0.233687 | -0.04895 | 0.177606 |
| MTHFD1L   | 0.468004 | 0.468182 | 0.000549 | 0.962857 |
| ZDHHC14   | 0.640472 | 0.637477 | -0.00676 | 0.636443 |
| APP       | 0.370444 | 0.370899 | 0.001771 | 0.769229 |
| RSPRY1    | 0.299242 | 0.296162 | -0.01493 | 0.59873  |
| S100B     | 0.569064 | 0.583157 | 0.035293 | 0.119852 |
| TMEM45B   | 0.29286  | 0.286412 | -0.03212 | 0.061196 |
| C20orf185 | 0.415283 | 0.448998 | 0.112616 | 0.217177 |
| AFAP1     | 0.484539 | 0.478267 | -0.0188  | 0.281004 |
| LMO4      | 0.236618 | 0.230484 | -0.03789 | 0.251002 |
| OTOP2     | 0.237135 | 0.224766 | -0.07728 | 0.033709 |
| C7orf33   | 0.561425 | 0.559044 | -0.00613 | 0.749729 |
| ANKRD30A  | 0.735415 | 0.726758 | -0.01708 | 0.294727 |
| ZNF79     | 0.133011 | 0.129838 | -0.03484 | 0.236867 |

|          |          |          |           |          |
|----------|----------|----------|-----------|----------|
| HAR1A    | 0.175302 | 0.181973 | 0.053879  | 0.481939 |
| UCN3     | 0.42165  | 0.403621 | -0.06305  | 0.193056 |
| KLK6     | 0.215381 | 0.205715 | -0.06624  | 0.387672 |
| MPP1     | 0.283522 | 0.298307 | 0.073339  | 0.237794 |
| STK17B   | 0.121079 | 0.124019 | 0.034613  | 0.3374   |
| NIPAL1   | 0.053875 | 0.053759 | -0.00312  | 0.427188 |
| CYP2A6   | 0.273766 | 0.28738  | 0.070014  | 0.37752  |
| CCDC101  | 0.19169  | 0.188817 | -0.02178  | 0.344482 |
| C1orf216 | 0.372511 | 0.370965 | -0.006    | 0.5955   |
| PERP     | 0.134612 | 0.141933 | 0.076411  | 0.212015 |
| C19orf25 | 0.171525 | 0.174624 | 0.025831  | 0.231378 |
| RBM5     | 0.410966 | 0.404051 | -0.02448  | 0.330411 |
| PGR      | 0.176911 | 0.172513 | -0.03631  | 0.551122 |
| TANC1    | 0.372221 | 0.367614 | -0.01797  | 0.4647   |
| THBS1    | 0.359049 | 0.354738 | -0.01743  | 0.819501 |
| RWDD2A   | 0.131185 | 0.128456 | -0.03033  | 0.401898 |
| R3HDM1   | 0.320898 | 0.30092  | -0.09274  | 0.196258 |
| TK1      | 0.587428 | 0.599641 | 0.029688  | 0.124923 |
| CLASP1   | 0.35222  | 0.354199 | 0.008083  | 0.65483  |
| SAPS1    | 0.097652 | 0.098445 | 0.011675  | 0.79067  |
| SESTD1   | 0.364078 | 0.365007 | 0.003674  | 0.680242 |
| CNOT7    | 0.225555 | 0.229762 | 0.026665  | 0.870525 |
| HCN3     | 0.279473 | 0.28071  | 0.00637   | 0.699112 |
| DNAH5    | 0.593783 | 0.596288 | 0.006074  | 0.621567 |
| NPTN     | 0.443358 | 0.446273 | 0.009453  | 0.581058 |
| RERE     | 0.452657 | 0.456554 | 0.012366  | 0.514425 |
| ZNF645   | 0.866123 | 0.860144 | -0.00999  | 0.508409 |
| LOC72908 | 0.106838 | 0.107643 | 0.010831  | 0.386392 |
| EPCAM    | 0.322334 | 0.337841 | 0.067787  | 0.10411  |
| PSAPL1   | 0.465728 | 0.450127 | -0.04915  | 0.055623 |
| ANKRD33  | 0.503209 | 0.485636 | -0.05128  | 0.304496 |
| CENPC1   | 0.065989 | 0.056813 | -0.21602  | 0.100198 |
| IL17REL  | 0.494095 | 0.487139 | -0.02046  | 0.931346 |
| FAM59B   | 0.381159 | 0.392813 | 0.043448  | 0.452001 |
| KRTAP2.2 | 0.189355 | 0.181251 | -0.0631   | 0.692228 |
| CABP5    | 0.297126 | 0.299543 | 0.011687  | 0.955436 |
| DVWA     | 0.136774 | 0.127432 | -0.10207  | 0.10865  |
| OR7E37P  | 0.343222 | 0.370721 | 0.111192  | 0.127228 |
| FAM104A  | 0.122011 | 0.118215 | -0.0456   | 0.352865 |
| SULF1    | 0.325297 | 0.342621 | 0.074855  | 0.446419 |
| TMEM205  | 0.142673 | 0.145308 | 0.026401  | 0.199501 |
| RDH8     | 0.142105 | 0.134627 | -0.07798  | 0.116022 |
| NXN      | 0.398931 | 0.434365 | 0.122768  | 0.158923 |
| IQCF6    | 0.531424 | 0.530108 | -0.00358  | 0.977709 |
| RGS2     | 0.126216 | 0.129077 | 0.032339  | 0.167351 |
| ZC3H7B   | 0.437159 | 0.436469 | -0.00228  | 0.940604 |
| MAGEC3   | 0.325888 | 0.388405 | 0.253182  | 0.025705 |
| VAR2     | 0.369494 | 0.369473 | -8.16E-05 | 0.666643 |
| FHL1     | 0.279357 | 0.291987 | 0.063791  | 0.207785 |
| ACSM3    | 0.285851 | 0.289155 | 0.016582  | 0.714691 |
| OPTN     | 0.221598 | 0.22568  | 0.026335  | 0.291527 |
| OCIAD2   | 0.311508 | 0.308669 | -0.0132   | 0.454804 |
| C12orf36 | 0.229128 | 0.214114 | -0.09777  | 0.452    |
| LETM2    | 0.238863 | 0.234491 | -0.02665  | 0.543373 |
| PEX26    | 0.158612 | 0.161468 | 0.025747  | 0.279967 |
| EIF3B    | 0.461855 | 0.457469 | -0.01377  | 0.390236 |

|           |          |          |          |          |
|-----------|----------|----------|----------|----------|
| GM2A      | 0.144124 | 0.144367 | 0.002429 | 0.767451 |
| FAM194B   | 0.238464 | 0.234776 | -0.02248 | 0.481938 |
| SNAPC1    | 0.189221 | 0.185981 | -0.02492 | 0.375007 |
| CRB2      | 0.553125 | 0.555535 | 0.006272 | 1        |
| CCL24     | 0.36864  | 0.36639  | -0.00883 | 0.931346 |
| SLC9A5    | 0.336229 | 0.330128 | -0.02642 | 0.197872 |
| PCDH19    | 0.205617 | 0.225795 | 0.135058 | 0.297965 |
| C1orf53   | 0.228686 | 0.234277 | 0.034843 | 0.289399 |
| FAM124B   | 0.327925 | 0.318431 | -0.04239 | 0.395394 |
| ZNF135    | 0.387548 | 0.385013 | -0.00947 | 0.70429  |
| KRTAP8.1  | 0.428041 | 0.410898 | -0.05897 | 0.546467 |
| TSPAN32   | 0.438991 | 0.436791 | -0.00725 | 0.957291 |
| HTN3      | 0.360668 | 0.452366 | 0.326822 | 0.001794 |
| CACNB4    | 0.276455 | 0.268205 | -0.04371 | 0.042791 |
| NCRNA000  | 0.745764 | 0.738504 | -0.01411 | 0.823122 |
| TMPRSS11  | 0.413659 | 0.43462  | 0.071311 | 0.342112 |
| UST       | 0.271827 | 0.286702 | 0.076863 | 0.322378 |
| CYP26A1   | 0.092331 | 0.095518 | 0.048957 | 0.123781 |
| ZNF880    | 0.119928 | 0.11694  | -0.0364  | 0.45762  |
| DKFZP586I | 0.839641 | 0.877417 | 0.063491 | 0.479026 |
| GPR171    | 0.836054 | 0.859744 | 0.04031  | 0.262714 |
| VPS13A    | 0.265828 | 0.256297 | -0.05268 | 0.11441  |
| DTWD2     | 0.31527  | 0.324226 | 0.040408 | 0.476155 |
| IMPG1     | 0.337125 | 0.350974 | 0.058084 | 0.193055 |
| ZMYM1     | 0.128483 | 0.127342 | -0.01286 | 0.832194 |
| C9orf153  | 0.285533 | 0.292945 | 0.036972 | 0.207784 |
| AQP11     | 0.20327  | 0.210907 | 0.05321  | 0.18989  |
| RBM15B    | 0.322778 | 0.31525  | -0.03405 | 0.606845 |
| PTGER3    | 0.318309 | 0.328524 | 0.045569 | 0.395393 |
| IREB2     | 0.173076 | 0.173604 | 0.004402 | 0.687081 |
| ACSM5     | 0.505101 | 0.529591 | 0.068307 | 0.370015 |
| ZC3H18    | 0.469399 | 0.468626 | -0.00238 | 0.892572 |
| FKBP9     | 0.199356 | 0.203124 | 0.027015 | 0.325804 |
| CTF1      | 0.224757 | 0.221053 | -0.02397 | 0.699111 |
| C1orf9    | 0.219929 | 0.222407 | 0.016168 | 0.531083 |
| RRP1B     | 0.772246 | 0.758934 | -0.02509 | 0.022912 |
| INO80     | 0.322474 | 0.31925  | -0.0145  | 0.476154 |
| GNAI2     | 0.328038 | 0.329831 | 0.007863 | 0.788877 |
| CCDC34    | 0.114013 | 0.114097 | 0.001065 | 0.651469 |
| OR4M1     | 0.430053 | 0.451826 | 0.071256 | 0.531087 |
| DNAH10    | 0.628853 | 0.623016 | -0.01345 | 0.170233 |
| TMEM139   | 0.709648 | 0.70514  | -0.0092  | 0.806854 |
| HP1BP3    | 0.079136 | 0.080259 | 0.020324 | 0.692227 |
| LOC28441  | 0.218426 | 0.228082 | 0.06241  | 0.289401 |
| KYNU      | 0.301866 | 0.326277 | 0.11219  | 0.093191 |
| KIF1C     | 0.584015 | 0.580319 | -0.00916 | 0.562062 |
| HERC4     | 0.220218 | 0.223672 | 0.022448 | 0.431275 |
| KLK8      | 0.216603 | 0.22405  | 0.048768 | 0.626512 |
| MIR190B   | 0.279093 | 0.260449 | -0.09974 | 0.216311 |
| BGN       | 0.613194 | 0.594959 | -0.04355 | 0.218045 |
| NOXO1     | 0.437491 | 0.4685   | 0.098795 | 0.14051  |
| GNA13     | 0.277276 | 0.279867 | 0.013421 | 0.401898 |
| DPRX      | 0.360113 | 0.379417 | 0.075334 | 0.237796 |
| INTS4     | 0.156539 | 0.154442 | -0.01946 | 0.600348 |
| GPR75     | 0.421553 | 0.449697 | 0.093239 | 0.0905   |
| CCDC40    | 0.475496 | 0.471884 | -0.011   | 0.45762  |

|           |          |          |          |          |
|-----------|----------|----------|----------|----------|
| SUMO4     | 0.800187 | 0.837227 | 0.065281 | 0.451988 |
| PPP2R2C   | 0.468908 | 0.460047 | -0.02752 | 0.404517 |
| RPS14     | 0.097557 | 0.099619 | 0.030179 | 0.479042 |
| TMEM176f  | 0.389948 | 0.388063 | -0.00699 | 0.968425 |
| ABHD12    | 0.174781 | 0.182405 | 0.061601 | 0.044491 |
| SEMA6D    | 0.349146 | 0.346998 | -0.0089  | 0.548016 |
| ATXN2L    | 0.216433 | 0.215378 | -0.00705 | 0.899941 |
| INF2      | 0.546047 | 0.529219 | -0.04516 | 0.004153 |
| KCND2     | 0.326208 | 0.349023 | 0.097531 | 0.048589 |
| SCNN1G    | 0.204894 | 0.195691 | -0.0663  | 0.367533 |
| LOC28595  | 0.383891 | 0.363147 | -0.08014 | 0.225087 |
| SLAMF8    | 0.418288 | 0.421919 | 0.012469 | 0.899941 |
| ITPR1PL2  | 0.381191 | 0.39717  | 0.059243 | 0.211164 |
| NBPF11    | 0.370912 | 0.39733  | 0.099263 | 0.215447 |
| ZDHHC6    | 0.329713 | 0.328909 | -0.00352 | 0.855883 |
| OLFM1     | 0.556821 | 0.534802 | -0.05821 | 0.032937 |
| C8orf39   | 0.336471 | 0.33571  | -0.00327 | 0.733893 |
| LOC40069  | 0.140077 | 0.156785 | 0.162565 | 0.411113 |
| RPLP1     | 0.092659 | 0.087534 | -0.08207 | 0.425842 |
| GPR17     | 0.78886  | 0.767453 | -0.03969 | 0.002771 |
| ITPR1     | 0.495327 | 0.497131 | 0.005244 | 0.489223 |
| CDYL      | 0.415019 | 0.413259 | -0.00613 | 0.747964 |
| C2orf73   | 0.068541 | 0.070246 | 0.03545  | 0.132531 |
| FXC1      | 0.171209 | 0.176965 | 0.0477   | 0.092286 |
| HLA.A     | 0.07242  | 0.081877 | 0.177067 | 0.043029 |
| ZNF600    | 0.175065 | 0.18596  | 0.087097 | 0.045487 |
| IFI16     | 0.163001 | 0.181618 | 0.156021 | 0.489224 |
| AMZ1      | 0.450884 | 0.439424 | -0.03714 | 0.0293   |
| C14orf143 | 0.547287 | 0.555629 | 0.021825 | 0.235027 |
| TIAM2     | 0.616474 | 0.605309 | -0.02637 | 0.12492  |
| OCLM      | 0.39391  | 0.41462  | 0.073925 | 0.264713 |
| ADAMTS8   | 0.290342 | 0.278467 | -0.06025 | 0.080754 |
| FER1L6    | 0.307484 | 0.296875 | -0.05065 | 0.16951  |
| ZNF217    | 0.46206  | 0.455811 | -0.01964 | 0.526516 |
| USF1      | 0.158122 | 0.157118 | -0.00919 | 0.72514  |
| CHST11    | 0.441564 | 0.434722 | -0.02253 | 0.415098 |
| PSENN     | 0.118452 | 0.116526 | -0.02365 | 0.4534   |
| MYT1      | 0.533839 | 0.52445  | -0.0256  | 0.20032  |
| TRDMT1    | 0.225085 | 0.225176 | 0.000583 | 0.953581 |
| SYN3      | 0.46014  | 0.457412 | -0.00858 | 0.666641 |
| ABHD8     | 0.447134 | 0.441054 | -0.01975 | 0.552679 |
| NT5C1A    | 0.222743 | 0.2304   | 0.048761 | 0.105607 |
| BAAT      | 0.267488 | 0.271566 | 0.02183  | 0.352867 |
| LOC28399  | 0.503676 | 0.47222  | -0.09304 | 0.013406 |
| C5orf22   | 0.291891 | 0.297113 | 0.025579 | 0.670033 |
| LOC14566  | 0.179913 | 0.182719 | 0.022322 | 0.518942 |
| C2CD2L    | 0.241915 | 0.242758 | 0.005024 | 0.498041 |
| ARSE      | 0.658249 | 0.64305  | -0.0337  | 0.189888 |
| AMN1      | 0.251164 | 0.256315 | 0.029289 | 0.408466 |
| OR51I2    | 0.312935 | 0.356128 | 0.186535 | 0.096412 |
| LYZ       | 0.714349 | 0.677072 | -0.07732 | 0.191468 |
| RPL4      | 0.390383 | 0.357983 | -0.125   | 0.008223 |
| CD180     | 0.498481 | 0.494292 | -0.01217 | 0.608471 |
| XPNPEP2   | 0.490496 | 0.471584 | -0.05673 | 0.318971 |
| C8orf75   | 0.376312 | 0.364001 | -0.04798 | 0.311123 |
| FMO3      | 0.27235  | 0.24867  | -0.13123 | 0.156187 |

|          |          |          |          |          |
|----------|----------|----------|----------|----------|
| BAG2     | 0.21294  | 0.213407 | 0.003156 | 0.619925 |
| STMN2    | 0.238201 | 0.244764 | 0.039215 | 0.163097 |
| PLXND1   | 0.583742 | 0.576952 | -0.01688 | 0.520453 |
| ADRB1    | 0.099613 | 0.099357 | -0.00371 | 0.877865 |
| NR2F6    | 0.175834 | 0.172932 | -0.02401 | 0.692227 |
| RHD      | 0.687753 | 0.681012 | -0.01421 | 0.474714 |
| GHR      | 0.132833 | 0.135646 | 0.03023  | 0.368772 |
| RREB1    | 0.47354  | 0.447177 | -0.08264 | 0.100202 |
| TSHR     | 0.371504 | 0.353871 | -0.07015 | 0.063488 |
| RAB11A   | 0.096082 | 0.098924 | 0.042055 | 0.217175 |
| MIR639   | 0.158134 | 0.154819 | -0.03057 | 0.638108 |
| NCAM2    | 0.20386  | 0.224563 | 0.139544 | 0.237796 |
| IRS4     | 0.177833 | 0.185077 | 0.057603 | 0.923945 |
| COL16A1  | 0.548034 | 0.516926 | -0.08431 | 0.005919 |
| MIR940   | 0.72804  | 0.714282 | -0.02753 | 0.451999 |
| ACY3     | 0.322451 | 0.327617 | 0.022929 | 0.797852 |
| POLR1C   | 0.487613 | 0.494033 | 0.018871 | 0.367532 |
| C16orf87 | 0.107173 | 0.108459 | 0.017208 | 0.404517 |
| CAPN14   | 0.486332 | 0.474733 | -0.03483 | 0.231378 |
| CRYBB2   | 0.772661 | 0.743959 | -0.05461 | 0.045737 |
| PRKAR2A  | 0.153821 | 0.155143 | 0.012354 | 0.428554 |
| NCRNA000 | 0.30128  | 0.319312 | 0.083859 | 0.148189 |
| MICAL1   | 0.270258 | 0.277284 | 0.037029 | 0.161697 |
| MANF     | 0.138023 | 0.141373 | 0.034595 | 0.337401 |
| ECHDC1   | 0.245318 | 0.239641 | -0.03378 | 0.44503  |
| KCTD9    | 0.224628 | 0.228708 | 0.025972 | 0.23595  |
| RGL3     | 0.102755 | 0.097625 | -0.07388 | 0.278929 |
| C1orf201 | 0.418916 | 0.404841 | -0.0493  | 0.509927 |
| IL7R     | 0.49095  | 0.41942  | -0.22718 | 0.007465 |
| TBK1     | 0.233203 | 0.236185 | 0.018327 | 0.361374 |
| C2orf49  | 0.05417  | 0.054633 | 0.012264 | 0.520449 |
| TPST2    | 0.384576 | 0.380057 | -0.01705 | 0.412439 |
| ZNF354C  | 0.168251 | 0.171082 | 0.024071 | 0.830378 |
| GAGE1    | 0.234397 | 0.250155 | 0.093868 | 0.537212 |
| SQRDL    | 0.26113  | 0.25026  | -0.06134 | 0.290462 |
| UACA     | 0.295596 | 0.284859 | -0.05338 | 0.235949 |
| ABCB5    | 0.501268 | 0.547087 | 0.126189 | 0.055921 |
| FAHD2B   | 0.166748 | 0.165185 | -0.01359 | 0.417769 |
| FAM60A   | 0.185094 | 0.171841 | -0.10719 | 0.024055 |
| SRMS     | 0.629028 | 0.613279 | -0.03658 | 0.33273  |
| NEDD1    | 0.184182 | 0.208374 | 0.178042 | 0.001554 |
| CISD1    | 0.221758 | 0.224808 | 0.019705 | 0.666641 |
| LOC10012 | 0.05298  | 0.050833 | -0.05969 | 0.166628 |
| FTSJD1   | 0.210729 | 0.2148   | 0.027603 | 0.368773 |
| LASS3    | 0.588495 | 0.597376 | 0.021609 | 0.365062 |
| MRPL17   | 0.071634 | 0.075747 | 0.080543 | 0.080347 |
| C18orf2  | 0.123775 | 0.116099 | -0.09237 | 0.231379 |
| LOC14870 | 0.067438 | 0.06687  | -0.01221 | 0.972138 |
| LOC10026 | 0.046405 | 0.055525 | 0.258866 | 0.014677 |
| LASS6    | 0.446063 | 0.449008 | 0.009494 | 0.56994  |
| TMEM195  | 0.210411 | 0.239966 | 0.189617 | 0.019522 |
| HIST1H3D | 0.097902 | 0.093979 | -0.059   | 0.490685 |
| CCND1    | 0.213505 | 0.21723  | 0.024955 | 0.953581 |
| CD300LB  | 0.190442 | 0.16727  | -0.18717 | 0.034298 |
| MIR1266  | 0.488921 | 0.509569 | 0.059678 | 0.343296 |
| C6orf163 | 0.344369 | 0.352689 | 0.03444  | 0.408468 |

|          |          |          |          |          |
|----------|----------|----------|----------|----------|
| TRPV6    | 0.740707 | 0.709616 | -0.06186 | 0.216306 |
| AP1S2    | 0.201011 | 0.19984  | -0.00843 | 0.861368 |
| NDUFB7   | 0.097582 | 0.095282 | -0.03441 | 0.541828 |
| SRGAP2   | 0.669366 | 0.664629 | -0.01025 | 0.709482 |
| DUS2L    | 0.102741 | 0.103195 | 0.006359 | 0.685368 |
| H2BFWT   | 0.536818 | 0.554704 | 0.047286 | 0.520453 |
| PAFAH2   | 0.212829 | 0.210689 | -0.01458 | 0.644776 |
| C1orf66  | 0.08987  | 0.093703 | 0.060251 | 0.175368 |
| C12orf63 | 0.125086 | 0.109519 | -0.19174 | 0.08035  |
| PTS      | 0.100071 | 0.100949 | 0.012599 | 0.574693 |
| C1orf126 | 0.557093 | 0.551187 | -0.01538 | 0.292591 |
| SLCO1C1  | 0.401696 | 0.451001 | 0.167026 | 0.018339 |
| MIR1228  | 0.708585 | 0.692705 | -0.0327  | 0.015552 |
| SIRPB2   | 0.16852  | 0.179279 | 0.089287 | 0.399288 |
| SCARNA4  | 0.851608 | 0.848136 | -0.00589 | 0.673426 |
| DHFRL1   | 0.829698 | 0.824107 | -0.00975 | 0.299034 |
| QPCTL    | 0.217859 | 0.218197 | 0.002237 | 0.735646 |
| REC8     | 0.205348 | 0.182443 | -0.17063 | 0.000398 |
| FAM55C   | 0.296704 | 0.287825 | -0.04383 | 0.322378 |
| MTHFR    | 0.330708 | 0.339357 | 0.037246 | 0.411112 |
| MRPL22   | 0.093682 | 0.089708 | -0.06254 | 0.35893  |
| KLRA1    | 0.908745 | 0.92262  | 0.02186  | 0.211979 |
| CYP3A7   | 0.46316  | 0.424089 | -0.12714 | 0.214586 |
| OVCH1    | 0.755872 | 0.757448 | 0.003005 | 0.885212 |
| CSNK1A1F | 0.594198 | 0.588246 | -0.01452 | 0.531084 |
| EYA2     | 0.246913 | 0.229608 | -0.10483 | 0.016789 |
| S100A10  | 0.21564  | 0.229089 | 0.087288 | 0.308904 |
| NCOA5    | 0.193502 | 0.199648 | 0.045112 | 0.085724 |
| P2RY1    | 0.156958 | 0.163934 | 0.06274  | 0.232289 |
| OSR2     | 0.161593 | 0.160156 | -0.01288 | 0.912856 |
| POLR3D   | 0.115172 | 0.116419 | 0.015539 | 0.633128 |
| DLL1     | 0.407565 | 0.419563 | 0.041857 | 0.421797 |
| TOM1L2   | 0.279611 | 0.275528 | -0.02122 | 0.508435 |
| OR5H2    | 0.18419  | 0.2149   | 0.222468 | 0.023765 |
| CSDAP1   | 0.099049 | 0.106811 | 0.108838 | 0.189103 |
| MGAT4C   | 0.216639 | 0.228448 | 0.076577 | 0.022913 |
| MRPS9    | 0.298987 | 0.303868 | 0.023361 | 0.356498 |
| C1orf64  | 0.586135 | 0.552004 | -0.08655 | 0.043999 |
| PIK3C2G  | 0.363774 | 0.370692 | 0.027177 | 0.281005 |
| TMEM209  | 0.160833 | 0.159401 | -0.0129  | 0.505454 |
| MYH7     | 0.588832 | 0.56789  | -0.05224 | 0.204442 |
| MICAL2   | 0.536491 | 0.529165 | -0.01984 | 0.439498 |
| MUL1     | 0.150506 | 0.150912 | 0.003887 | 0.740917 |
| NCF4     | 0.241659 | 0.225989 | -0.09672 | 0.106614 |
| MAGEA4   | 0.605932 | 0.635191 | 0.068034 | 0.219791 |
| DCD      | 0.282041 | 0.264446 | -0.09293 | 0.287287 |
| DEFA6    | 0.621638 | 0.611056 | -0.02477 | 0.506945 |
| OR14A16  | 0.276794 | 0.290748 | 0.070959 | 0.34093  |
| SLC34A3  | 0.515497 | 0.498072 | -0.04961 | 0.471842 |
| SUSD1    | 0.252532 | 0.246298 | -0.03606 | 0.251965 |
| WBSCR26  | 0.518225 | 0.507783 | -0.02937 | 0.266712 |
| C5orf39  | 0.103179 | 0.101541 | -0.02309 | 0.279965 |
| ELANE    | 0.315082 | 0.313433 | -0.00757 | 0.850404 |
| NDUFA5   | 0.142514 | 0.140484 | -0.02069 | 0.656513 |
| GLUD2    | 0.367277 | 0.376363 | 0.035255 | 0.568362 |
| BRD9     | 0.59859  | 0.588059 | -0.02561 | 0.138637 |

|          |          |          |          |          |
|----------|----------|----------|----------|----------|
| SLC31A2  | 0.152949 | 0.151485 | -0.01388 | 0.771009 |
| KIAA1432 | 0.168914 | 0.176749 | 0.065408 | 0.209467 |
| TNFSF10  | 0.431529 | 0.497824 | 0.206176 | 0.067927 |
| EHD4     | 0.422623 | 0.412018 | -0.03666 | 0.114409 |
| RAB37    | 0.249583 | 0.224195 | -0.15477 | 0.011223 |
| KRTAP4.3 | 0.333878 | 0.308363 | -0.11469 | 0.234114 |
| MYBPHL   | 0.384013 | 0.38856  | 0.016984 | 0.215445 |
| PTTG2    | 0.353704 | 0.357285 | 0.01453  | 0.848579 |
| NTRK3    | 0.41828  | 0.405131 | -0.04608 | 0.055326 |
| NPFFR2   | 0.179629 | 0.196724 | 0.131159 | 0.012475 |
| C9orf27  | 0.184242 | 0.199302 | 0.113355 | 0.162396 |
| PRH2     | 0.78978  | 0.783553 | -0.01142 | 0.592276 |
| LMO1     | 0.155638 | 0.160332 | 0.042863 | 0.21287  |
| UBE2E3   | 0.376064 | 0.390318 | 0.05367  | 0.117651 |
| PCSK4    | 0.631979 | 0.623419 | -0.01967 | 0.33506  |
| RIPPLY2  | 0.043394 | 0.042678 | -0.02398 | 0.792457 |
| MYBPH    | 0.497375 | 0.483165 | -0.04182 | 0.171691 |
| CCDC138  | 0.095323 | 0.094678 | -0.0098  | 0.844931 |
| PLEC1    | 0.505783 | 0.497248 | -0.02455 | 0.154828 |
| HOXD13   | 0.100938 | 0.09941  | -0.02201 | 0.484844 |
| SPRYD4   | 0.055925 | 0.054193 | -0.0454  | 0.176097 |
| CGREF1   | 0.290972 | 0.289205 | -0.00879 | 0.453402 |
| ZFAND2A  | 0.246882 | 0.248956 | 0.012069 | 0.407149 |
| SPP1     | 0.447489 | 0.451768 | 0.01373  | 0.901785 |
| C17orf87 | 0.636575 | 0.628351 | -0.01876 | 0.554237 |
| SERPINA1 | 0.317422 | 0.29221  | -0.1194  | 0.121525 |
| C6orf192 | 0.182341 | 0.195122 | 0.097737 | 0.081567 |
| PKHD1    | 0.529233 | 0.569454 | 0.105675 | 0.00022  |
| LOC84989 | 0.079334 | 0.077488 | -0.03396 | 0.671727 |
| MIR1912  | 0.195945 | 0.18645  | -0.07166 | 0.392809 |
| HMX2     | 0.127944 | 0.151533 | 0.244114 | 0.038455 |
| TAF7     | 0.175664 | 0.176755 | 0.008934 | 0.5955   |
| ZBPB2    | 0.410595 | 0.41267  | 0.007274 | 0.461862 |
| B3GALT5  | 0.505057 | 0.496784 | -0.02383 | 0.814076 |
| NR3C2    | 0.236735 | 0.249979 | 0.078536 | 0.320106 |
| BPGM     | 0.22313  | 0.218639 | -0.02934 | 0.421794 |
| ASNS     | 0.124038 | 0.127572 | 0.040532 | 0.163095 |
| EMD      | 0.157528 | 0.175748 | 0.157899 | 0.438122 |
| PAQR8    | 0.398852 | 0.394623 | -0.01538 | 0.199504 |
| DLC1     | 0.416244 | 0.415168 | -0.00373 | 0.896256 |
| KIF5B    | 0.286536 | 0.299254 | 0.062654 | 0.038237 |
| RPS27L   | 0.03991  | 0.039449 | -0.01676 | 0.923938 |
| C10orf84 | 0.234821 | 0.234967 | 0.000897 | 0.951726 |
| SNORD34  | 0.911872 | 0.907265 | -0.00731 | 0.273755 |
| TXNL4B   | 0.195563 | 0.198111 | 0.018672 | 0.407146 |
| KATNAL1  | 0.173713 | 0.180025 | 0.051497 | 0.007159 |
| C1orf204 | 0.26101  | 0.242475 | -0.10627 | 0.085727 |
| PCDHB2   | 0.348677 | 0.366992 | 0.073858 | 0.191467 |
| SLC9A9   | 0.428694 | 0.470364 | 0.13383  | 0.090943 |
| ATF7IP   | 0.381012 | 0.371912 | -0.03488 | 0.201141 |
| DHRS13   | 0.100802 | 0.103585 | 0.039281 | 0.435371 |
| MT1H     | 0.237074 | 0.219198 | -0.11311 | 0.202787 |
| SPDYC    | 0.60999  | 0.582835 | -0.0657  | 0.074492 |
| COPG     | 0.182642 | 0.1793   | -0.02664 | 0.243394 |
| COL7A1   | 0.408708 | 0.410017 | 0.004612 | 0.751496 |
| NHLRC3   | 0.108075 | 0.112365 | 0.056164 | 0.37001  |

|           |          |          |          |          |
|-----------|----------|----------|----------|----------|
| TYRP1     | 0.818821 | 0.831324 | 0.021864 | 0.848576 |
| C21orf84  | 0.768127 | 0.725721 | -0.08193 | 0.214578 |
| FA2H      | 0.342677 | 0.333062 | -0.04106 | 0.225087 |
| SGK196    | 0.182124 | 0.182466 | 0.002712 | 0.44642  |
| LRRC8E    | 0.348866 | 0.361701 | 0.052123 | 0.427198 |
| ACCN4     | 0.283917 | 0.280115 | -0.01945 | 0.700837 |
| ITLN1     | 0.348197 | 0.354461 | 0.025726 | 0.821312 |
| IL29      | 0.173412 | 0.160473 | -0.11187 | 0.171691 |
| LOC10013  | 0.122092 | 0.122835 | 0.008753 | 0.502482 |
| ABCA17P   | 0.366406 | 0.362061 | -0.01721 | 0.500999 |
| LOC10012  | 0.661736 | 0.653444 | -0.01819 | 0.541828 |
| SNORD11f  | 0.884376 | 0.898906 | 0.02351  | 0.680231 |
| LOC15222  | 0.217281 | 0.195235 | -0.15435 | 0.084462 |
| OSGEPL1   | 0.294369 | 0.285317 | -0.04506 | 0.305594 |
| SNORA80   | 0.789725 | 0.78637  | -0.00614 | 0.653143 |
| SLC5A8    | 0.169001 | 0.159666 | -0.08198 | 0.193853 |
| DNAH7     | 0.296097 | 0.311889 | 0.074965 | 0.011298 |
| ZNF19     | 0.285662 | 0.293331 | 0.038222 | 0.460446 |
| RASGRP1   | 0.226041 | 0.212945 | -0.0861  | 0.018339 |
| TCEAL8    | 0.06036  | 0.064304 | 0.09131  | 0.806854 |
| ADAMTS2   | 0.465507 | 0.458312 | -0.02247 | 0.138637 |
| OSTF1     | 0.132151 | 0.138714 | 0.069928 | 0.639774 |
| FRMD7     | 0.151244 | 0.141353 | -0.09758 | 0.365063 |
| FAM117A   | 0.171241 | 0.169803 | -0.01216 | 0.474714 |
| C8orf56   | 0.171188 | 0.15549  | -0.13876 | 0.000377 |
| SYNGR3    | 0.281811 | 0.300056 | 0.090503 | 0.340931 |
| SLCO6A1   | 0.581881 | 0.592525 | 0.026153 | 0.218915 |
| LNX1      | 0.644322 | 0.649982 | 0.012618 | 0.470404 |
| ZSCAN10   | 0.345735 | 0.351481 | 0.023776 | 0.723397 |
| LAD1      | 0.444695 | 0.432929 | -0.03869 | 0.608472 |
| ZNF608    | 0.389783 | 0.411034 | 0.076588 | 0.039335 |
| SNORD38   | 0.518404 | 0.483067 | -0.10185 | 0.035707 |
| ADHFE1    | 0.278928 | 0.274189 | -0.02472 | 0.287284 |
| PTPN23    | 0.383987 | 0.374259 | -0.03702 | 0.068278 |
| BMI1      | 0.259155 | 0.26178  | 0.01454  | 0.574693 |
| SFRS2IP   | 0.240083 | 0.24224  | 0.012902 | 0.413769 |
| IFITM1    | 0.247322 | 0.280337 | 0.180773 | 0.17463  |
| C3AR1     | 0.405563 | 0.410765 | 0.018387 | 0.77101  |
| GABRA6    | 0.360134 | 0.395413 | 0.134827 | 0.152148 |
| VAC14     | 0.460918 | 0.462441 | 0.004758 | 0.805051 |
| CAV3      | 0.430032 | 0.424937 | -0.0172  | 0.514426 |
| XAGE1B    | 0.54084  | 0.480065 | -0.17197 | 0.133741 |
| C20orf108 | 0.114139 | 0.112029 | -0.02692 | 0.474714 |
| NPM1      | 0.153938 | 0.14803  | -0.05647 | 0.100202 |
| UGT2A1    | 0.702397 | 0.771644 | 0.135649 | 0.05743  |
| SERPIN1   | 0.334761 | 0.327334 | -0.03237 | 0.616643 |
| TMEM200f  | 0.153568 | 0.158625 | 0.046749 | 0.812268 |
| RAD54L    | 0.04075  | 0.042624 | 0.064886 | 0.160986 |
| TMEM184f  | 0.150549 | 0.150512 | -0.00036 | 0.892573 |
| HECTD3    | 0.126432 | 0.126523 | 0.001034 | 0.801449 |
| C14orf101 | 0.168084 | 0.169346 | 0.01079  | 0.629816 |
| MIR1283.2 | 0.171645 | 0.163543 | -0.06976 | 0.116563 |
| LINGO4    | 0.447578 | 0.429206 | -0.06047 | 0.084042 |
| PRKCD     | 0.40046  | 0.393005 | -0.02711 | 0.172422 |
| PP14571   | 0.352491 | 0.368547 | 0.064263 | 0.119853 |
| FCRL4     | 0.384762 | 0.354569 | -0.1179  | 0.252931 |

|           |          |          |          |          |
|-----------|----------|----------|----------|----------|
| ACTB      | 0.153729 | 0.154753 | 0.009572 | 0.381305 |
| TCAM1     | 0.364718 | 0.335828 | -0.11906 | 0.018339 |
| KRTAP19.1 | 0.389238 | 0.38573  | -0.01306 | 0.517435 |
| FAM58B    | 0.240113 | 0.263177 | 0.132322 | 0.13194  |
| OR2AG1    | 0.297079 | 0.312551 | 0.073245 | 0.629817 |
| MIR346    | 0.547581 | 0.483682 | -0.17901 | 0.084461 |
| C11orf35  | 0.428822 | 0.403909 | -0.08635 | 0.138637 |
| ANO1      | 0.644027 | 0.620921 | -0.05271 | 0.008279 |
| PPM1E     | 0.163548 | 0.168357 | 0.041807 | 0.105606 |
| BEND5     | 0.461639 | 0.46882  | 0.02227  | 0.340928 |
| KIAA1462  | 0.546758 | 0.543686 | -0.00813 | 0.663259 |
| WAPAL     | 0.169023 | 0.171944 | 0.024725 | 0.350457 |
| WHSC2     | 0.518935 | 0.518821 | -0.00032 | 0.903628 |
| CHRD1     | 0.152873 | 0.153702 | 0.007796 | 0.959146 |
| LOC10013  | 0.634387 | 0.634439 | 0.000118 | 0.907317 |
| CSK       | 0.526926 | 0.519544 | -0.02035 | 0.387667 |
| C12orf60  | 0.346539 | 0.347783 | 0.005169 | 0.569941 |
| LOC81691  | 0.037144 | 0.037003 | -0.00549 | 0.92764  |
| MIR182    | 0.659241 | 0.683176 | 0.051451 | 0.064155 |
| SCARA3    | 0.388219 | 0.385638 | -0.00962 | 0.68195  |
| GRIK1     | 0.145133 | 0.14677  | 0.016176 | 0.755033 |
| ERBB4     | 0.252736 | 0.266282 | 0.075324 | 0.119299 |
| DNAI1     | 0.42995  | 0.426292 | -0.01233 | 0.707752 |
| HK2       | 0.261246 | 0.260254 | -0.00549 | 0.80145  |
| SLC9A10   | 0.336162 | 0.333789 | -0.01022 | 0.944311 |
| ESX1      | 0.132535 | 0.150355 | 0.181998 | 0.405832 |
| HEY2      | 0.161107 | 0.151752 | -0.08631 | 0.138017 |
| SARNP     | 0.359511 | 0.372747 | 0.05216  | 0.021289 |
| GZMB      | 0.294827 | 0.281669 | -0.06587 | 0.186762 |
| PPPDE2    | 0.076185 | 0.070742 | -0.10694 | 0.054152 |
| HNF1B     | 0.175135 | 0.162327 | -0.10957 | 0.160306 |
| FBXW5     | 0.728737 | 0.726895 | -0.00365 | 0.716427 |
| BTBD19    | 0.367167 | 0.342507 | -0.10031 | 0.00167  |
| RAG2      | 0.220382 | 0.229928 | 0.061173 | 0.649796 |
| TCTEX1D2  | 0.088853 | 0.091267 | 0.038664 | 0.228666 |
| KRTAP20.1 | 0.414674 | 0.439819 | 0.084931 | 0.267718 |
| ZNF233    | 0.115132 | 0.123232 | 0.098081 | 0.042081 |
| PTP4A3    | 0.681041 | 0.665295 | -0.03375 | 0.065504 |
| SNORA26   | 0.057656 | 0.057368 | -0.00724 | 0.985138 |
| KLRF1     | 0.428128 | 0.39348  | -0.12175 | 0.174631 |
| PLEKHF2   | 0.382088 | 0.387784 | 0.021347 | 0.552679 |
| DENND4B   | 0.403564 | 0.399879 | -0.01324 | 0.413769 |
| KDELC1    | 0.024384 | 0.02463  | 0.014499 | 0.253737 |
| SFRS12IP1 | 0.095614 | 0.099642 | 0.059539 | 0.165209 |
| TUSC1     | 0.116425 | 0.102835 | -0.17906 | 0.512924 |
| C4A       | 0.517211 | 0.519971 | 0.007677 | 0.821312 |
| UGCG      | 0.268015 | 0.272143 | 0.022047 | 0.399287 |
| SEC22A    | 0.177521 | 0.181307 | 0.030449 | 0.606843 |
| GLS       | 0.244775 | 0.247218 | 0.014327 | 0.912856 |
| PREX2     | 0.183083 | 0.173637 | -0.07643 | 0.461862 |
| C7orf45   | 0.288477 | 0.272278 | -0.08338 | 0.023194 |
| LOC72960  | 0.358519 | 0.373689 | 0.059786 | 0.043513 |
| ROCK2     | 0.294589 | 0.303125 | 0.041212 | 0.285181 |
| PVRL3     | 0.253037 | 0.25618  | 0.017813 | 0.772791 |
| C2orf54   | 0.634601 | 0.60787  | -0.06209 | 0.127227 |
| TFEC      | 0.210636 | 0.197292 | -0.09442 | 0.549568 |

|           |          |          |          |          |
|-----------|----------|----------|----------|----------|
| GCG       | 0.530743 | 0.514106 | -0.04595 | 0.618284 |
| AGT       | 0.690714 | 0.67751  | -0.02785 | 0.080753 |
| KRTAP20.4 | 0.507698 | 0.513514 | 0.016435 | 0.990711 |
| HTR3D     | 0.582524 | 0.561983 | -0.05179 | 0.095946 |
| FBL       | 0.210274 | 0.217012 | 0.045506 | 0.390234 |
| GGT3P     | 0.691185 | 0.681506 | -0.02035 | 0.128391 |
| GPR144    | 0.348862 | 0.325855 | -0.09842 | 0.087438 |
| C16orf42  | 0.27527  | 0.279401 | 0.021488 | 0.407148 |
| MIR641    | 0.331334 | 0.332093 | 0.003303 | 0.821312 |
| PITX2     | 0.089757 | 0.085365 | -0.07238 | 0.461859 |
| CDH16     | 0.589662 | 0.556853 | -0.08259 | 0.082797 |
| C1orf105  | 0.137517 | 0.146356 | 0.08988  | 0.020515 |
| LOC15482  | 0.628167 | 0.616981 | -0.02592 | 0.747963 |
| ADD2      | 0.40633  | 0.410855 | 0.015976 | 0.429913 |
| AMDHD1    | 0.302692 | 0.299906 | -0.01334 | 0.385118 |
| IGFBPL1   | 0.333583 | 0.321475 | -0.05334 | 0.046502 |
| TNP2      | 0.53992  | 0.515636 | -0.06639 | 0.013939 |
| CDO1      | 0.211631 | 0.216084 | 0.030045 | 0.264712 |
| C1orf213  | 0.180811 | 0.181498 | 0.005464 | 0.700837 |
| H6PD      | 0.514202 | 0.506873 | -0.02071 | 0.130155 |
| CTH       | 0.1259   | 0.124618 | -0.01477 | 0.661571 |
| C2orf50   | 0.147453 | 0.144464 | -0.02954 | 0.776358 |
| LOC40101  | 0.388309 | 0.383416 | -0.01829 | 0.613369 |
| THPO      | 0.64903  | 0.640097 | -0.01999 | 0.479042 |
| LRRTM1    | 0.570067 | 0.621444 | 0.124495 | 0.242454 |
| CTPS2     | 0.309206 | 0.313681 | 0.020729 | 0.229569 |
| LRRC45    | 0.155128 | 0.159351 | 0.038745 | 0.524996 |
| AKNAD1    | 0.479637 | 0.473915 | -0.01731 | 0.152145 |
| WDR88     | 0.605661 | 0.599287 | -0.01526 | 0.233195 |
| CGRRF1    | 0.141486 | 0.137675 | -0.0394  | 0.33273  |
| HTR7      | 0.114588 | 0.121829 | 0.088401 | 0.074872 |
| GTF2F1    | 0.10383  | 0.104912 | 0.014952 | 0.316716 |
| C1orf151  | 0.185262 | 0.187043 | 0.013804 | 0.356497 |
| CA5A      | 0.552079 | 0.542327 | -0.02571 | 0.158234 |
| UNC50     | 0.158493 | 0.148209 | -0.09679 | 0.230472 |
| CD34      | 0.39444  | 0.385417 | -0.03339 | 0.363831 |
| MME       | 0.131623 | 0.140584 | 0.095017 | 0.177607 |
| MIR548F2  | 0.697956 | 0.745303 | 0.094692 | 0.039112 |
| CFH       | 0.194457 | 0.215994 | 0.151541 | 0.06688  |
| RFX4      | 0.227633 | 0.219456 | -0.05278 | 0.061521 |
| KIR3DL3   | 0.386835 | 0.406887 | 0.072906 | 0.167351 |
| CCNB1IP1  | 0.408567 | 0.401436 | -0.0254  | 0.23965  |
| ALDH3A1   | 0.522928 | 0.506811 | -0.04516 | 0.049122 |
| TRPM1     | 0.598202 | 0.573702 | -0.06033 | 0.055031 |
| MOV10L1   | 0.4692   | 0.45463  | -0.04551 | 0.170962 |
| COL8A2    | 0.429339 | 0.426034 | -0.01115 | 0.584249 |
| IFITM2    | 0.088064 | 0.109189 | 0.310194 | 0.022635 |
| ZNF781    | 0.127799 | 0.132611 | 0.053323 | 0.053285 |
| IRF5      | 0.302655 | 0.305065 | 0.011441 | 0.644777 |
| KCNK9     | 0.345729 | 0.335561 | -0.04307 | 0.045992 |
| EIF5A     | 0.058559 | 0.057496 | -0.02644 | 0.579452 |
| NENF      | 0.176967 | 0.166992 | -0.08371 | 0.028447 |
| RAB35     | 0.4868   | 0.480327 | -0.01931 | 0.251964 |
| LPPR1     | 0.43342  | 0.438517 | 0.016866 | 0.416433 |
| RANBP2    | 0.30695  | 0.312126 | 0.024123 | 0.247174 |
| SAV1      | 0.16381  | 0.166474 | 0.023271 | 0.489223 |

|          |          |          |          |          |
|----------|----------|----------|----------|----------|
| FXVD1    | 0.413422 | 0.371927 | -0.15259 | 0.014965 |
| TSC22D2  | 0.217834 | 0.224872 | 0.045877 | 0.439498 |
| IER5L    | 0.122382 | 0.114712 | -0.09338 | 0.04208  |
| TMPRSS8  | 0.261232 | 0.264874 | 0.019971 | 0.774574 |
| ATP5A1   | 0.117478 | 0.118639 | 0.014183 | 0.288341 |
| C7orf26  | 0.581077 | 0.584686 | 0.008933 | 0.528033 |
| NEUROD1  | 0.115857 | 0.123038 | 0.086754 | 0.243393 |
| LRRC8A   | 0.693083 | 0.688537 | -0.00949 | 0.610101 |
| SNORD115 | 0.295769 | 0.304112 | 0.040128 | 0.454805 |
| TCTN3    | 0.143554 | 0.146904 | 0.033285 | 0.18062  |
| C9orf91  | 0.155164 | 0.153914 | -0.01167 | 0.707751 |
| NTSR1    | 0.226221 | 0.229399 | 0.02013  | 0.606845 |
| CSMD3    | 0.20639  | 0.216678 | 0.070181 | 0.23595  |
| PIGS     | 0.189411 | 0.18541  | -0.03079 | 0.416435 |
| XKR4     | 0.423408 | 0.401679 | -0.07601 | 0.269733 |
| PALLD    | 0.459891 | 0.47674  | 0.051913 | 0.037591 |
| FAM89A   | 0.318585 | 0.305225 | -0.0618  | 0.121524 |
| OR2C3    | 0.187352 | 0.195908 | 0.06442  | 0.424493 |
| SPIN2B   | 0.122101 | 0.135691 | 0.152242 | 0.3034   |
| FAH      | 0.237399 | 0.234333 | -0.01875 | 0.615004 |
| AP3M1    | 0.357559 | 0.353337 | -0.01713 | 0.548016 |
| KCNIP1   | 0.309891 | 0.294449 | -0.07375 | 0.027127 |
| TATDN2   | 0.15304  | 0.15075  | -0.02176 | 0.41111  |
| EBF2     | 0.172486 | 0.154993 | -0.15428 | 0.103122 |
| CEACAM1  | 0.62244  | 0.582676 | -0.09524 | 0.112288 |
| AP4M1    | 0.460768 | 0.478335 | 0.053981 | 0.141767 |
| TRIM22   | 0.183906 | 0.196921 | 0.09865  | 0.49952  |
| INO80C   | 0.168776 | 0.171033 | 0.019165 | 0.520452 |
| GUCY2D   | 0.319157 | 0.313618 | -0.02526 | 0.850404 |
| RAD1     | 0.167387 | 0.171089 | 0.031562 | 0.234112 |
| ZBTB7B   | 0.327187 | 0.318541 | -0.03864 | 0.256818 |
| HESX1    | 0.815946 | 0.800328 | -0.02788 | 0.042076 |
| GLO1     | 0.151403 | 0.156032 | 0.043449 | 0.133139 |
| KCNA1    | 0.163423 | 0.172957 | 0.081798 | 0.224198 |
| SYT6     | 0.260594 | 0.257592 | -0.01672 | 0.293661 |
| FAM82B   | 0.200598 | 0.203819 | 0.022984 | 0.423143 |
| MZF1     | 0.120371 | 0.122713 | 0.027808 | 0.474713 |
| PKD1L2   | 0.585569 | 0.578921 | -0.01647 | 0.571522 |
| BGLAP    | 0.687023 | 0.684038 | -0.00628 | 0.998142 |
| PCOLCE   | 0.383082 | 0.401074 | 0.066212 | 0.041148 |
| OR2B3    | 0.316906 | 0.289031 | -0.13283 | 0.181379 |
| ADAMTS1  | 0.255975 | 0.245899 | -0.05794 | 0.050753 |
| THRSP    | 0.684626 | 0.680575 | -0.00856 | 0.573104 |
| CKB      | 0.224974 | 0.222056 | -0.01883 | 0.337401 |
| FAM160A1 | 0.386163 | 0.396494 | 0.038089 | 0.030711 |
| HEATR7A  | 0.556206 | 0.54354  | -0.03323 | 0.086152 |
| C4orf41  | 0.131083 | 0.1312   | 0.001291 | 0.868693 |
| CHMP1A   | 0.572828 | 0.575319 | 0.006261 | 0.397982 |
| BACE2    | 0.22721  | 0.246321 | 0.116516 | 0.274818 |
| PSAT1    | 0.133641 | 0.126479 | -0.07947 | 0.670031 |
| TMEM225  | 0.442198 | 0.454795 | 0.040523 | 0.282045 |
| ADCY5    | 0.486902 | 0.485553 | -0.004   | 0.769229 |
| C9orf125 | 0.376259 | 0.378875 | 0.009994 | 0.735648 |
| SLC2A13  | 0.452119 | 0.466997 | 0.04671  | 0.059921 |
| SPATA24  | 0.195699 | 0.196973 | 0.009363 | 0.294733 |
| C6orf168 | 0.406963 | 0.414721 | 0.027243 | 0.405833 |

|           |          |          |          |          |
|-----------|----------|----------|----------|----------|
| GSN       | 0.448993 | 0.447762 | -0.00396 | 0.812268 |
| OPN4      | 0.707275 | 0.700897 | -0.01307 | 0.46612  |
| NRSN1     | 0.26633  | 0.278986 | 0.066978 | 0.100202 |
| ZNF17     | 0.123913 | 0.120638 | -0.03865 | 0.349255 |
| TWF1      | 0.171141 | 0.165308 | -0.05003 | 0.329255 |
| ACTG1     | 0.111787 | 0.121515 | 0.120379 | 0.631471 |
| TMEM106   | 0.533215 | 0.547376 | 0.037817 | 0.794259 |
| C15orf43  | 0.572223 | 0.575186 | 0.00745  | 0.562063 |
| CENPBD1   | 0.078524 | 0.097743 | 0.31585  | 0.005712 |
| SEC13     | 0.366746 | 0.358032 | -0.03469 | 0.239652 |
| NMI       | 0.252888 | 0.244757 | -0.04715 | 0.531087 |
| HLCS      | 0.256052 | 0.259952 | 0.021804 | 0.473277 |
| SLC38A5   | 0.554952 | 0.550427 | -0.01181 | 0.658197 |
| KRTAP10.2 | 0.287952 | 0.304605 | 0.081111 | 0.540288 |
| OR2J3     | 0.300705 | 0.296038 | -0.02257 | 0.628163 |
| CIT       | 0.434386 | 0.433688 | -0.00232 | 0.810463 |
| SEC23IP   | 0.136384 | 0.138444 | 0.021626 | 0.266714 |
| CIR1      | 0.084815 | 0.085816 | 0.016924 | 0.401891 |
| EPS8L1    | 0.131898 | 0.139687 | 0.082774 | 0.420451 |
| CYTL1     | 0.523938 | 0.425039 | -0.3018  | 0.016895 |
| EPC1      | 0.101125 | 0.107484 | 0.087984 | 0.012071 |
| ZNF570    | 0.075449 | 0.070622 | -0.09538 | 0.253895 |
| TMEM164   | 0.145882 | 0.160176 | 0.134852 | 0.052999 |
| DPCR1     | 0.252433 | 0.256818 | 0.024845 | 0.927645 |
| TMED9     | 0.102443 | 0.105639 | 0.044321 | 0.221546 |
| KLK10     | 0.083098 | 0.086571 | 0.059084 | 0.517435 |
| SMTN      | 0.329431 | 0.334346 | 0.021366 | 0.392809 |
| FTCD      | 0.695025 | 0.693076 | -0.00405 | 0.492149 |
| HDGFRP3   | 0.112284 | 0.116272 | 0.050355 | 0.446419 |
| C7orf59   | 0.097707 | 0.0995   | 0.026232 | 0.303401 |
| ATPAF1    | 0.142546 | 0.144915 | 0.023775 | 0.324654 |
| OGT       | 0.272046 | 0.288793 | 0.086185 | 0.154831 |
| RRP12     | 0.200786 | 0.202209 | 0.01019  | 0.521964 |
| EXOC5     | 0.77053  | 0.808244 | 0.06894  | 0.515925 |
| AACS      | 0.546376 | 0.544111 | -0.00599 | 0.60359  |
| ZSWIM4    | 0.488389 | 0.482681 | -0.01696 | 0.297963 |
| ASPRV1    | 0.860661 | 0.85211  | -0.01441 | 0.074105 |
| MAB21L2   | 0.387155 | 0.382571 | -0.01719 | 0.762121 |
| AKAP3     | 0.696304 | 0.680778 | -0.03253 | 0.468978 |
| C20orf202 | 0.448768 | 0.42288  | -0.08572 | 0.326952 |
| CABP7     | 0.400482 | 0.386353 | -0.05182 | 0.028616 |
| ALDH5A1   | 0.208147 | 0.2056   | -0.01776 | 0.673428 |
| CHD7      | 0.471887 | 0.464951 | -0.02136 | 0.229567 |
| BSPH1     | 0.266842 | 0.311839 | 0.224812 | 0.006221 |
| SCP2      | 0.264    | 0.268232 | 0.022946 | 0.390234 |
| ZSWIM6    | 0.274893 | 0.280617 | 0.029728 | 0.174631 |
| CRELD1    | 0.22503  | 0.221419 | -0.02334 | 0.521965 |
| CRELD2    | 0.588285 | 0.578649 | -0.02383 | 0.372506 |
| SCARNA11  | 0.71964  | 0.723648 | 0.008013 | 0.7462   |
| LHFPL1    | 0.552429 | 0.541199 | -0.02963 | 0.428555 |
| C1orf125  | 0.264984 | 0.270499 | 0.029721 | 0.207783 |
| AKNA      | 0.364596 | 0.348079 | -0.06688 | 0.48049  |
| TCTEX1D1  | 0.184289 | 0.192371 | 0.061922 | 0.345673 |
| SLFN12L   | 0.145645 | 0.154302 | 0.083307 | 0.267718 |
| OTOL1     | 0.532526 | 0.545532 | 0.034811 | 0.265712 |
| ZNF280B   | 0.276151 | 0.281915 | 0.0298   | 0.182905 |

|           |          |          |          |          |
|-----------|----------|----------|----------|----------|
| MMP1      | 0.512442 | 0.53763  | 0.069226 | 0.21631  |
| THAP6     | 0.407572 | 0.424609 | 0.059081 | 0.296883 |
| NCOA2     | 0.460402 | 0.469707 | 0.028866 | 0.355285 |
| OR51L1    | 0.328385 | 0.320241 | -0.03623 | 0.352867 |
| LOC40109  | 0.084376 | 0.08498  | 0.010287 | 0.91101  |
| MIR29B2   | 0.652041 | 0.666744 | 0.03217  | 0.43812  |
| LOC38815  | 0.70044  | 0.711642 | 0.022889 | 0.208621 |
| PRKACB    | 0.129042 | 0.131237 | 0.024336 | 0.434005 |
| AKR7A2    | 0.269142 | 0.269514 | 0.00199  | 0.70602  |
| SPPL3     | 0.199352 | 0.200366 | 0.00732  | 0.74973  |
| YAP1      | 0.198565 | 0.196338 | -0.01627 | 0.905474 |
| RLN3      | 0.745138 | 0.660606 | -0.17372 | 0.002358 |
| SNX20     | 0.572211 | 0.558677 | -0.03453 | 0.170235 |
| TCEAL4    | 0.366549 | 0.380561 | 0.05412  | 0.047535 |
| HIST2H2A  | 0.061971 | 0.059822 | -0.05091 | 0.565203 |
| B4GALT5   | 0.264791 | 0.264354 | -0.00238 | 0.868693 |
| NUDT21    | 0.117198 | 0.121814 | 0.055732 | 0.160306 |
| ECT2L     | 0.388869 | 0.438648 | 0.173776 | 0.003528 |
| C2orf28   | 0.253387 | 0.262263 | 0.04967  | 0.090498 |
| FEM1A     | 0.217116 | 0.208202 | -0.06048 | 0.011298 |
| HNRNPA2   | 0.254914 | 0.242494 | -0.07207 | 0.098767 |
| KIAA1009  | 0.161352 | 0.167581 | 0.054641 | 0.134343 |
| SET       | 0.192418 | 0.180474 | -0.09245 | 0.076404 |
| ZNF417    | 0.186686 | 0.185301 | -0.01074 | 0.71991  |
| PDE6D     | 0.248113 | 0.244454 | -0.02144 | 0.303401 |
| C20orf71  | 0.281937 | 0.301207 | 0.09538  | 0.388951 |
| EXOC7     | 0.350125 | 0.349153 | -0.00401 | 0.887053 |
| INPPL1    | 0.230953 | 0.228578 | -0.01491 | 0.590667 |
| FLCN      | 0.399842 | 0.399315 | -0.0019  | 0.938752 |
| TAP1      | 0.364069 | 0.376573 | 0.04872  | 0.496566 |
| SYTL4     | 0.295787 | 0.293053 | -0.0134  | 0.352867 |
| KDM4C     | 0.163792 | 0.157022 | -0.06089 | 0.087869 |
| KRTAP10.1 | 0.301042 | 0.315953 | 0.069749 | 0.317844 |
| C4orf45   | 0.309374 | 0.32421  | 0.067576 | 0.249085 |
| SOHLH2    | 0.833315 | 0.833392 | 0.000132 | 0.844929 |
| LUC7L     | 0.463558 | 0.462961 | -0.00186 | 0.7462   |
| STARD3NL  | 0.193763 | 0.196385 | 0.019394 | 0.348058 |
| MED13L    | 0.442    | 0.453062 | 0.035663 | 0.368771 |
| LHX1      | 0.078139 | 0.075314 | -0.05313 | 0.159605 |
| PSMA7     | 0.100894 | 0.101958 | 0.015134 | 0.238717 |
| CAPG      | 0.56427  | 0.552154 | -0.03131 | 0.034696 |
| KLK2      | 0.262452 | 0.26994  | 0.040589 | 0.84311  |
| PUSL1     | 0.273221 | 0.269385 | -0.0204  | 0.459032 |
| C16orf71  | 0.282724 | 0.284169 | 0.007354 | 0.985138 |
| API5      | 0.224043 | 0.224673 | 0.00405  | 0.783504 |
| TMEM90A   | 0.292831 | 0.285601 | -0.03607 | 0.480489 |
| HIST1H2BI | 0.094961 | 0.089457 | -0.08613 | 0.318968 |
| SPATA17   | 0.140187 | 0.13248  | -0.08158 | 0.210316 |
| GSTA2     | 0.251408 | 0.287557 | 0.193817 | 0.006865 |
| ANKRD32   | 0.151854 | 0.150594 | -0.01202 | 0.79965  |
| PIWIL3    | 0.177791 | 0.171177 | -0.05469 | 0.158923 |
| LAX1      | 0.478816 | 0.456147 | -0.06997 | 0.153486 |
| PATE1     | 0.660287 | 0.629418 | -0.06907 | 0.247176 |
| FBP2      | 0.841944 | 0.827486 | -0.02499 | 0.027778 |
| SLC26A11  | 0.400803 | 0.405424 | 0.016537 | 0.312236 |
| ZSCAN12L  | 0.208432 | 0.184377 | -0.17692 | 0.394099 |

|          |          |          |          |          |
|----------|----------|----------|----------|----------|
| DYNC1I2  | 0.187677 | 0.18444  | -0.0251  | 0.946164 |
| ACRC     | 0.722823 | 0.733008 | 0.020187 | 0.500996 |
| POLR3G   | 0.34836  | 0.351714 | 0.013826 | 0.535677 |
| C1orf192 | 0.350429 | 0.349519 | -0.00375 | 0.909164 |
| ATAD5    | 0.166365 | 0.163263 | -0.02716 | 0.66495  |
| MAN1B1   | 0.584096 | 0.576263 | -0.01948 | 0.12781  |
| FGL2     | 0.242994 | 0.216478 | -0.1667  | 0.587458 |
| LYAR     | 0.125132 | 0.125943 | 0.009328 | 0.855882 |
| PNLIPRP1 | 0.579324 | 0.578472 | -0.00212 | 0.985138 |
| PCMT1    | 0.305775 | 0.305608 | -0.00079 | 0.659883 |
| ARHGAP11 | 0.076674 | 0.076052 | -0.01174 | 0.769228 |
| MDP1     | 0.327155 | 0.332029 | 0.021334 | 0.338574 |
| CTRC     | 0.433069 | 0.418498 | -0.04938 | 0.041612 |
| AOX2P    | 0.588988 | 0.597257 | 0.020112 | 0.914703 |
| C7orf46  | 0.24592  | 0.258521 | 0.072092 | 0.18444  |
| GGTA1    | 0.077136 | 0.076066 | -0.02014 | 0.610102 |
| TMED2    | 0.095613 | 0.093305 | -0.03525 | 0.62486  |
| CCT6P1   | 0.238088 | 0.239738 | 0.009959 | 0.457619 |
| WDFY2    | 0.410452 | 0.408611 | -0.00648 | 0.551121 |
| CCT6B    | 0.16915  | 0.161221 | -0.06927 | 0.350458 |
| NACAD    | 0.271467 | 0.276832 | 0.028234 | 0.324659 |
| C2orf40  | 0.41913  | 0.396942 | -0.07847 | 0.546466 |
| FAM133B  | 0.125977 | 0.120239 | -0.06726 | 0.136785 |
| XKR6     | 0.445124 | 0.439231 | -0.01923 | 0.176858 |
| AGXT2    | 0.396235 | 0.385542 | -0.03947 | 0.683658 |
| C19orf22 | 0.412433 | 0.416661 | 0.014712 | 0.382574 |
| CES3     | 0.461653 | 0.43195  | -0.09594 | 0.000937 |
| NFU1     | 0.24556  | 0.251285 | 0.033248 | 0.227768 |
| ZNF433   | 0.046475 | 0.046371 | -0.00325 | 1        |
| SCARNA21 | 0.829594 | 0.824977 | -0.00805 | 0.235924 |
| PCM1     | 0.175913 | 0.178681 | 0.022525 | 0.287286 |
| PASD1    | 0.332337 | 0.340912 | 0.036753 | 0.496566 |
| RNF220   | 0.31221  | 0.299922 | -0.05793 | 0.006675 |
| CRAT     | 0.436584 | 0.445383 | 0.028786 | 0.067225 |
| MUC12    | 0.239835 | 0.242127 | 0.013721 | 0.877865 |
| GSTT2B   | 0.302273 | 0.299164 | -0.01492 | 0.901785 |
| RMRP     | 0.166324 | 0.154021 | -0.11087 | 0.129568 |
| RPS10P7  | 0.336253 | 0.331965 | -0.01852 | 0.33273  |
| MIR892B  | 0.558838 | 0.587614 | 0.072439 | 0.446419 |
| DDX52    | 0.124918 | 0.130317 | 0.061042 | 0.043999 |
| ARMC9    | 0.368909 | 0.364818 | -0.01609 | 0.407149 |
| KLHDC8B  | 0.12646  | 0.134188 | 0.085574 | 0.134345 |
| TSPYL4   | 0.1211   | 0.118516 | -0.03113 | 0.528037 |
| VPS39    | 0.079024 | 0.083543 | 0.080241 | 0.02555  |
| PDHB     | 0.112529 | 0.113776 | 0.015904 | 0.323515 |
| GRXCR1   | 0.780272 | 0.790244 | 0.018321 | 0.110712 |
| MLYCD    | 0.617577 | 0.613551 | -0.00944 | 0.447811 |
| TMEM114  | 0.369117 | 0.352545 | -0.06627 | 0.217177 |
| TRAPPC1  | 0.095287 | 0.097571 | 0.034175 | 0.323515 |
| KLRAQ1   | 0.173365 | 0.178181 | 0.03953  | 0.176857 |
| TROVE2   | 0.12719  | 0.128486 | 0.014623 | 0.377519 |
| PHB      | 0.10857  | 0.10543  | -0.04235 | 0.284131 |
| SNORA7A  | 0.058802 | 0.053026 | -0.14917 | 0.242447 |
| CSF3     | 0.475215 | 0.464135 | -0.03403 | 0.390236 |
| CCDC22   | 0.280506 | 0.301867 | 0.105879 | 0.028112 |
| GLYATL3  | 0.330701 | 0.364342 | 0.139765 | 0.001458 |

|           |          |          |          |          |
|-----------|----------|----------|----------|----------|
| C3orf58   | 0.092339 | 0.097655 | 0.080748 | 0.07188  |
| MRRF      | 0.4865   | 0.494145 | 0.022497 | 0.32695  |
| LOC64728  | 0.493289 | 0.507985 | 0.042352 | 0.058045 |
| PGLYRP3   | 0.250965 | 0.232112 | -0.11266 | 0.289402 |
| PLEKHO1   | 0.083984 | 0.083153 | -0.01435 | 0.792462 |
| KAZALD1   | 0.359264 | 0.341554 | -0.07293 | 0.103615 |
| METAP2    | 0.115986 | 0.116039 | 0.000666 | 0.549566 |
| PPP1CB    | 0.109258 | 0.115459 | 0.079648 | 0.063154 |
| IFLTD1    | 0.238789 | 0.242369 | 0.021469 | 0.370015 |
| RNF170    | 0.295751 | 0.299637 | 0.018829 | 0.493622 |
| SNORD83   | 0.867409 | 0.85772  | -0.01621 | 0.09781  |
| MBD3L2    | 0.376801 | 0.414782 | 0.138552 | 0.37752  |
| SIP1      | 0.206144 | 0.200054 | -0.04326 | 0.070058 |
| MKL2      | 0.260418 | 0.261046 | 0.003476 | 0.728639 |
| PLN       | 0.740804 | 0.747763 | 0.013489 | 0.496565 |
| ABCA12    | 0.575268 | 0.608125 | 0.080134 | 0.001956 |
| ACAD8     | 0.736179 | 0.730384 | -0.0114  | 0.18367  |
| ADAP2     | 0.360066 | 0.349339 | -0.04363 | 0.187538 |
| ARHGAP18  | 0.311067 | 0.315837 | 0.021956 | 0.283088 |
| SLC20A1   | 0.198976 | 0.198007 | -0.00704 | 0.71991  |
| ATG2A     | 0.521229 | 0.51726  | -0.01103 | 0.429912 |
| AMAC1L2   | 0.681228 | 0.697279 | 0.033598 | 0.119299 |
| PLGLB1    | 0.527814 | 0.529981 | 0.005911 | 0.888892 |
| SRRM3     | 0.431902 | 0.437344 | 0.018064 | 0.44226  |
| NR1I3     | 0.432728 | 0.423973 | -0.02949 | 0.313352 |
| ATP2B2    | 0.534564 | 0.520205 | -0.03928 | 0.130155 |
| SLC41A1   | 0.279019 | 0.274529 | -0.0234  | 0.428555 |
| SYPL2     | 0.197865 | 0.187254 | -0.07952 | 0.085301 |
| CHMP1B    | 0.11682  | 0.107203 | -0.12394 | 0.012475 |
| ZNF697    | 0.460331 | 0.454316 | -0.01898 | 0.421795 |
| FAM120C   | 0.168471 | 0.191349 | 0.183707 | 0.085304 |
| RPS20     | 0.281671 | 0.276356 | -0.02748 | 0.26571  |
| TTC3      | 0.541491 | 0.545716 | 0.011213 | 0.397986 |
| TRIM13    | 0.368401 | 0.376971 | 0.033177 | 0.483391 |
| FBXO9     | 0.099959 | 0.099988 | 0.00042  | 0.555795 |
| LARP7     | 0.15491  | 0.151886 | -0.02844 | 0.311124 |
| IARS2     | 0.153993 | 0.155784 | 0.016682 | 0.737403 |
| AFG3L1    | 0.414497 | 0.417147 | 0.009193 | 0.668337 |
| LOC72938  | 0.69528  | 0.759806 | 0.128036 | 0.015354 |
| ZNF512B   | 0.496756 | 0.490813 | -0.01736 | 0.253896 |
| IL17A     | 0.548286 | 0.628583 | 0.197173 | 0.016472 |
| KIAA1712  | 0.216926 | 0.20695  | -0.06792 | 0.10968  |
| C10orf105 | 0.672235 | 0.65326  | -0.04131 | 0.09972  |
| CSAD      | 0.111387 | 0.112458 | 0.013813 | 0.887053 |
| DLX5      | 0.21847  | 0.273798 | 0.325675 | 0.0194   |
| HTRA3     | 0.493955 | 0.457124 | -0.11179 | 0.016263 |
| CT45A1    | 0.439591 | 0.454177 | 0.047092 | 0.264714 |
| FAM12B    | 0.326354 | 0.30558  | -0.09489 | 0.068279 |
| PRCD      | 0.500937 | 0.545562 | 0.123112 | 0.036326 |
| C21orf58  | 0.407649 | 0.40215  | -0.01959 | 0.474714 |
| HDAC11    | 0.214818 | 0.218279 | 0.023058 | 0.859539 |
| RPL23P8   | 0.417773 | 0.44059  | 0.076718 | 0.464701 |
| DHX40     | 0.227077 | 0.251929 | 0.149836 | 0.030533 |
| PAN2      | 0.125404 | 0.122885 | -0.02928 | 0.483389 |
| GALK2     | 0.215835 | 0.220023 | 0.027727 | 0.173155 |
| CITED1    | 0.154124 | 0.157857 | 0.034525 | 0.237795 |

|           |          |          |          |          |
|-----------|----------|----------|----------|----------|
| C20orf200 | 0.441347 | 0.4652   | 0.075936 | 0.125495 |
| SIRT2     | 0.179091 | 0.173979 | -0.04178 | 0.436747 |
| DBN1      | 0.414291 | 0.418004 | 0.012873 | 0.621569 |
| IFNA7     | 0.36913  | 0.328931 | -0.16635 | 0.129568 |
| VWF       | 0.533305 | 0.538461 | 0.013883 | 0.409787 |
| EPS8      | 0.253587 | 0.265449 | 0.065953 | 0.101167 |
| ZNF486    | 0.066238 | 0.057615 | -0.20122 | 0.480483 |
| APBB1IP   | 0.213947 | 0.194434 | -0.13798 | 0.197067 |
| ABCF3     | 0.176668 | 0.177901 | 0.010031 | 0.404518 |
| PKHD1L1   | 0.459935 | 0.472954 | 0.040269 | 0.182903 |
| SNORD115  | 0.801165 | 0.806161 | 0.008969 | 0.515927 |
| C13orf31  | 0.123879 | 0.12854  | 0.053282 | 0.649794 |
| C7orf43   | 0.223274 | 0.221119 | -0.01399 | 0.443643 |
| B4GALT6   | 0.173727 | 0.165069 | -0.07375 | 0.028787 |
| HOXA6     | 0.145969 | 0.152921 | 0.067124 | 0.593888 |
| LYST      | 0.398103 | 0.405754 | 0.027465 | 0.535676 |
| MYADML2   | 0.400733 | 0.389023 | -0.04278 | 0.066534 |
| FPR1      | 0.236066 | 0.233086 | -0.01833 | 0.646449 |
| NKIRAS2   | 0.171854 | 0.170454 | -0.0118  | 0.794258 |
| NRD1      | 0.22452  | 0.22885  | 0.027559 | 0.390235 |
| KIAA0776  | 0.086849 | 0.082721 | -0.07025 | 0.468972 |
| SH3KBP1   | 0.332169 | 0.336243 | 0.017588 | 0.273794 |
| CUL4A     | 0.501249 | 0.499021 | -0.00643 | 0.62651  |
| TKTL1     | 0.536843 | 0.528803 | -0.02177 | 0.505454 |
| FAM170B   | 0.660245 | 0.650354 | -0.02178 | 0.461854 |
| LOC15018  | 0.723642 | 0.699187 | -0.0496  | 0.038454 |
| COG6      | 0.179398 | 0.183408 | 0.031892 | 0.275843 |
| PIP5K1C   | 0.647965 | 0.636026 | -0.02683 | 0.033128 |
| FHL2      | 0.336498 | 0.326623 | -0.04297 | 0.064828 |
| FECH      | 0.161181 | 0.156772 | -0.04001 | 0.435376 |
| LOC39974  | 0.551527 | 0.559284 | 0.020148 | 0.307797 |
| ZNF770    | 0.190694 | 0.195998 | 0.039582 | 0.23503  |
| HIST3H2BI | 0.043786 | 0.041964 | -0.06131 | 0.32351  |
| EPHA2     | 0.515618 | 0.499241 | -0.04657 | 0.103614 |
| C1orf112  | 0.010458 | 0.009512 | -0.13675 | 0.859407 |
| LOC10012  | 0.699206 | 0.680313 | -0.03952 | 0.005671 |
| MIR518C   | 0.066084 | 0.061096 | -0.11321 | 0.217174 |
| NXPH3     | 0.119536 | 0.113935 | -0.06924 | 0.19626  |
| TSTD1     | 0.603814 | 0.604242 | 0.001023 | 0.927644 |
| DPEP1     | 0.439212 | 0.441592 | 0.007797 | 0.797852 |
| LDHAL6A   | 0.290733 | 0.300007 | 0.0453   | 0.639774 |
| AHR       | 0.136317 | 0.153333 | 0.169697 | 0.051867 |
| TRIB1     | 0.203167 | 0.199127 | -0.02898 | 0.700837 |
| OR52B6    | 0.367518 | 0.401342 | 0.127019 | 0.120965 |
| OR4C45    | 0.11833  | 0.128583 | 0.11988  | 0.283089 |
| ST8SIA6   | 0.229568 | 0.217045 | -0.08092 | 0.063819 |
| ETV4      | 0.144892 | 0.140161 | -0.04789 | 0.206109 |
| KRTDAP    | 0.348456 | 0.350165 | 0.007058 | 0.918399 |
| NR5A2     | 0.205151 | 0.216781 | 0.079557 | 0.226872 |
| ENTHD1    | 0.591378 | 0.510351 | -0.21259 | 0.000153 |
| C1orf21   | 0.423629 | 0.418618 | -0.01717 | 0.222422 |
| CXXC5     | 0.374714 | 0.374529 | -0.00072 | 0.778142 |
| TNK2      | 0.613072 | 0.607751 | -0.01257 | 0.339744 |
| PRRC1     | 0.059168 | 0.061125 | 0.046927 | 0.387667 |
| FBXL20    | 0.218689 | 0.224231 | 0.036109 | 0.240582 |
| MFAP3     | 0.125646 | 0.126472 | 0.009454 | 0.593887 |

|           |          |          |          |          |
|-----------|----------|----------|----------|----------|
| SACM1L    | 0.094851 | 0.093358 | -0.0229  | 0.468975 |
| NCRNA001  | 0.105868 | 0.106153 | 0.003883 | 0.779928 |
| S100A9    | 0.423648 | 0.383805 | -0.14249 | 0.133139 |
| TRAM2     | 0.398829 | 0.398909 | 0.000292 | 0.832194 |
| RSPH4A    | 0.060848 | 0.057948 | -0.07046 | 0.456204 |
| DNAH17    | 0.615987 | 0.606406 | -0.02262 | 0.242449 |
| FAM125A   | 0.181429 | 0.178488 | -0.02358 | 0.317842 |
| TMIGD2    | 0.597795 | 0.575279 | -0.05539 | 0.014121 |
| C7orf13   | 0.236832 | 0.242558 | 0.034464 | 0.181379 |
| FAM113A   | 0.231199 | 0.229747 | -0.00909 | 0.71469  |
| DEFB133   | 0.370854 | 0.431807 | 0.219533 | 0.020263 |
| IFRD1     | 0.165197 | 0.165836 | 0.005565 | 0.852229 |
| ATP6V0E1  | 0.211297 | 0.215075 | 0.025564 | 0.408467 |
| ZNF766    | 0.323498 | 0.326205 | 0.01202  | 0.466123 |
| TUBB2C    | 0.170915 | 0.175236 | 0.036021 | 0.17537  |
| COPZ2     | 0.289165 | 0.268862 | -0.10502 | 0.027127 |
| APEH      | 0.186386 | 0.185443 | -0.00732 | 0.988853 |
| KIF18B    | 0.208624 | 0.199966 | -0.06115 | 0.284133 |
| OR5D13    | 0.290775 | 0.279673 | -0.05617 | 0.407149 |
| GAL3ST3   | 0.364404 | 0.357526 | -0.02749 | 0.09782  |
| PYCR2     | 0.161871 | 0.167492 | 0.049244 | 0.372503 |
| CLSTN2    | 0.30399  | 0.296521 | -0.03589 | 0.095021 |
| CLNS1A    | 0.082132 | 0.08235  | 0.003829 | 0.855881 |
| SLC29A2   | 0.200179 | 0.210554 | 0.0729   | 0.015159 |
| LOC339561 | 0.563112 | 0.548887 | -0.03691 | 0.219792 |
| RASAL2    | 0.428121 | 0.431461 | 0.011209 | 0.67513  |
| SOX2OT    | 0.337761 | 0.36483  | 0.111221 | 0.512926 |
| CTSB      | 0.287589 | 0.288917 | 0.006646 | 0.753264 |
| UIMC1     | 0.08114  | 0.081789 | 0.011502 | 0.863197 |
| LOC442451 | 0.333039 | 0.336101 | 0.0132   | 0.524996 |
| TYR       | 0.458675 | 0.492313 | 0.102105 | 0.136786 |
| C6orf155  | 0.112935 | 0.114966 | 0.025723 | 0.391517 |
| ZNF878    | 0.201287 | 0.204866 | 0.025426 | 0.678534 |
| SLK       | 0.10613  | 0.109547 | 0.045717 | 0.428553 |
| HBG1      | 0.336838 | 0.35069  | 0.058143 | 0.555799 |
| C20orf166 | 0.31671  | 0.324699 | 0.035939 | 0.783504 |
| OPALIN    | 0.352139 | 0.359207 | 0.028671 | 0.998142 |
| MAGEA10   | 0.565724 | 0.567982 | 0.005747 | 0.844932 |
| PTPRT     | 0.096156 | 0.097882 | 0.025666 | 0.121519 |
| CBX1      | 0.242205 | 0.244002 | 0.010669 | 0.725143 |
| SBDSP     | 0.060793 | 0.057679 | -0.07585 | 0.366288 |
| LOC100181 | 0.358685 | 0.350367 | -0.03385 | 0.333894 |
| C19orf69  | 0.171406 | 0.173353 | 0.016295 | 0.758574 |
| SEEL      | 0.627563 | 0.625307 | -0.0052  | 0.412438 |
| ZNF660    | 0.099467 | 0.10248  | 0.043051 | 0.102628 |
| MAPKAPK5  | 0.254895 | 0.253639 | -0.00713 | 0.508436 |
| SLC14A1   | 0.526533 | 0.4834   | -0.1233  | 0.017884 |
| ZNF440    | 0.054876 | 0.053696 | -0.03137 | 0.286228 |
| KCNH8     | 0.36449  | 0.368263 | 0.014858 | 0.323517 |
| ZNF397OS  | 0.224968 | 0.23982  | 0.092235 | 0.068986 |
| MGC26597  | 0.36863  | 0.383159 | 0.055772 | 0.212017 |
| MIR130B   | 0.10556  | 0.10222  | -0.04638 | 0.419111 |
| LARP1     | 0.457655 | 0.450805 | -0.02176 | 0.311121 |
| RNF121    | 0.173373 | 0.169458 | -0.03295 | 0.733893 |
| PMS2      | 0.216333 | 0.212436 | -0.02623 | 0.508436 |
| DCHS1     | 0.554162 | 0.552622 | -0.00401 | 0.763895 |

|          |          |          |          |          |
|----------|----------|----------|----------|----------|
| PHPT1    | 0.116384 | 0.117105 | 0.008918 | 0.73916  |
| KCNJ14   | 0.641966 | 0.642919 | 0.00214  | 0.905473 |
| PPARGC1A | 0.33169  | 0.323146 | -0.03765 | 0.247179 |
| MAP3K14  | 0.249088 | 0.248626 | -0.00268 | 0.968425 |
| PRDM1    | 0.284513 | 0.296106 | 0.05762  | 0.416435 |
| ZP1      | 0.554973 | 0.53621  | -0.04962 | 0.068632 |
| SCN5A    | 0.553054 | 0.537943 | -0.03997 | 0.01952  |
| JARID2   | 0.533766 | 0.527803 | -0.01621 | 0.21631  |
| PPP1R8   | 0.350222 | 0.351452 | 0.005056 | 0.922096 |
| TECPR1   | 0.569307 | 0.57225  | 0.007441 | 0.477596 |
| ZBTB8OS  | 0.053893 | 0.052663 | -0.03331 | 0.865028 |
| EMP3     | 0.253202 | 0.255514 | 0.013114 | 0.783504 |
| LGALS9B  | 0.372229 | 0.314953 | -0.24106 | 0.018571 |
| TXNDC6   | 0.197056 | 0.195754 | -0.00956 | 0.615003 |
| PRPS1L1  | 0.710348 | 0.750643 | 0.079601 | 0.059919 |
| RAB3D    | 0.148844 | 0.154542 | 0.0542   | 0.108649 |
| HPS4     | 0.225054 | 0.220618 | -0.02872 | 0.457622 |
| BEND4    | 0.298106 | 0.322657 | 0.114178 | 0.036534 |
| BRWD1    | 0.345037 | 0.346995 | 0.008166 | 0.697388 |
| SLMO2    | 0.361805 | 0.351307 | -0.04248 | 0.086152 |
| C14orf19 | 0.614725 | 0.627839 | 0.030454 | 0.133739 |
| ADCK5    | 0.396996 | 0.395032 | -0.00715 | 0.608472 |
| SLC17A3  | 0.779965 | 0.798523 | 0.033924 | 0.742676 |
| CATSPER1 | 0.308947 | 0.316911 | 0.036715 | 0.616644 |
| C1orf129 | 0.174176 | 0.15995  | -0.12293 | 0.024055 |
| PSG4     | 0.115474 | 0.129897 | 0.169795 | 0.172421 |
| RAB6C    | 0.062039 | 0.057751 | -0.10334 | 0.391515 |
| LOC38963 | 0.150287 | 0.144971 | -0.05195 | 0.32466  |
| EHBP1L1  | 0.451634 | 0.438722 | -0.04185 | 0.218046 |
| GADL1    | 0.269716 | 0.26901  | -0.00378 | 0.489222 |
| CACNA1A  | 0.25483  | 0.253874 | -0.00542 | 0.922096 |
| ZNF740   | 0.244543 | 0.240214 | -0.02577 | 0.560492 |
| NRTN     | 0.254913 | 0.249405 | -0.03151 | 0.537212 |
| TBC1D16  | 0.636304 | 0.624386 | -0.02728 | 0.041611 |
| DMRT2    | 0.152676 | 0.159815 | 0.065929 | 0.548016 |
| NKAIN3   | 0.207304 | 0.199293 | -0.05686 | 0.457622 |
| GLRA1    | 0.187049 | 0.182885 | -0.03248 | 0.403205 |
| ITIH5    | 0.379005 | 0.374903 | -0.0157  | 0.659884 |
| STAT2    | 0.122024 | 0.119629 | -0.0286  | 0.716428 |
| MIR27A   | 0.407618 | 0.384559 | -0.08401 | 0.134346 |
| SNORD15  | 0.06064  | 0.059748 | -0.02139 | 0.970281 |
| ZAR1L    | 0.711447 | 0.70808  | -0.00684 | 0.557357 |
| C1orf180 | 0.332228 | 0.344531 | 0.052459 | 0.256818 |
| ZDHHC21  | 0.190022 | 0.196744 | 0.050157 | 0.099243 |
| ZNF862   | 0.417457 | 0.411225 | -0.0217  | 0.28834  |
| PHACTR1  | 0.5172   | 0.514584 | -0.00732 | 0.711217 |
| RNF6     | 0.226908 | 0.232665 | 0.03615  | 0.235949 |
| CCNJL    | 0.313339 | 0.317667 | 0.019792 | 0.471842 |
| LPHN2    | 0.175794 | 0.182576 | 0.054612 | 0.282044 |
| PIGL     | 0.367843 | 0.368978 | 0.004446 | 0.749729 |
| LYZL4    | 0.226372 | 0.213182 | -0.08661 | 0.211164 |
| RNASEL   | 0.420909 | 0.42522  | 0.014702 | 0.83583  |
| MSL3     | 0.231254 | 0.246123 | 0.089901 | 0.06382  |
| MMP11    | 0.300383 | 0.271337 | -0.14672 | 0.012394 |
| PLEKHF1  | 0.443815 | 0.435759 | -0.02643 | 0.220667 |
| PTP4A1   | 0.282911 | 0.2938   | 0.054488 | 0.212871 |

|           |          |          |          |          |
|-----------|----------|----------|----------|----------|
| SNORD11f  | 0.447884 | 0.441236 | -0.02158 | 0.666643 |
| CHRD12    | 0.365459 | 0.347114 | -0.0743  | 0.003373 |
| C1orf187  | 0.197521 | 0.18819  | -0.06981 | 0.095947 |
| PTCHD1    | 0.309278 | 0.328629 | 0.087553 | 0.244336 |
| TAC3      | 0.388718 | 0.368657 | -0.07645 | 0.018687 |
| C16orf82  | 0.514274 | 0.464723 | -0.14617 | 0.004372 |
| OR13F1    | 0.784533 | 0.810841 | 0.047586 | 0.087863 |
| TAPBPL    | 0.272233 | 0.277176 | 0.02596  | 0.442259 |
| MBNL1     | 0.430339 | 0.444837 | 0.047802 | 0.118748 |
| GRHL3     | 0.27262  | 0.247223 | -0.14108 | 0.04046  |
| LOC84856  | 0.187714 | 0.196008 | 0.062376 | 0.506945 |
| RASSF9    | 0.404992 | 0.434445 | 0.101281 | 0.332731 |
| CCDC14    | 0.289534 | 0.287584 | -0.00975 | 0.633128 |
| FLJ16779  | 0.085961 | 0.087284 | 0.022036 | 0.628163 |
| CNOT8     | 0.167665 | 0.16584  | -0.01579 | 0.670031 |
| MIR505    | 0.359082 | 0.363334 | 0.016985 | 0.725143 |
| MSN       | 0.192852 | 0.195472 | 0.019471 | 0.412439 |
| NSL1      | 0.096109 | 0.101322 | 0.076202 | 0.128977 |
| GNL3L     | 0.193582 | 0.207222 | 0.09823  | 0.206108 |
| OR10W1    | 0.219829 | 0.200065 | -0.13591 | 0.081975 |
| RPH3A     | 0.272552 | 0.266251 | -0.03375 | 0.128979 |
| SAMD3     | 0.209723 | 0.248011 | 0.24192  | 0.01916  |
| HSD11B2   | 0.221353 | 0.21479  | -0.04342 | 0.232289 |
| KRTAP19.8 | 0.598743 | 0.624052 | 0.059729 | 0.477597 |
| WDR18     | 0.285649 | 0.28117  | -0.0228  | 0.473277 |
| HERC3     | 0.299245 | 0.300597 | 0.006504 | 0.654832 |
| AES       | 0.103549 | 0.103529 | -0.00027 | 0.654832 |
| RFC1      | 0.187018 | 0.191036 | 0.030664 | 0.927644 |
| ADRA1B    | 0.238746 | 0.215019 | -0.15101 | 0.007362 |
| GJB3      | 0.529486 | 0.512083 | -0.04821 | 0.005166 |
| HAPLN2    | 0.162287 | 0.147194 | -0.14083 | 0.007836 |
| EIF2AK2   | 0.337499 | 0.338303 | 0.00343  | 0.615005 |
| AEBP1     | 0.535    | 0.541123 | 0.016417 | 0.312233 |
| STMN4     | 0.334426 | 0.337104 | 0.011507 | 0.756802 |
| CYP11B2   | 0.275587 | 0.26672  | -0.04718 | 0.440879 |
| C1RL      | 0.322953 | 0.315534 | -0.03353 | 0.383844 |
| SMG1      | 0.231161 | 0.228888 | -0.01426 | 0.21979  |
| TRPM2     | 0.290145 | 0.308777 | 0.089793 | 0.297965 |
| TFAM      | 0.083248 | 0.087362 | 0.06959  | 0.155505 |
| SRPK1     | 0.212791 | 0.212046 | -0.00506 | 0.592276 |
| RTTN      | 0.086218 | 0.08822  | 0.033117 | 0.307798 |
| CDH5      | 0.538435 | 0.506998 | -0.08679 | 0.000693 |
| SPANXC    | 0.337076 | 0.380558 | 0.175042 | 0.039113 |
| ANKRD56   | 0.237542 | 0.249544 | 0.071107 | 0.408468 |
| MMP15     | 0.363309 | 0.359185 | -0.01647 | 0.33041  |
| C1orf114  | 0.25313  | 0.250139 | -0.01715 | 0.661571 |
| DKFZp566l | 0.404698 | 0.355609 | -0.18655 | 0.074115 |
| C12orf41  | 0.074464 | 0.07649  | 0.038722 | 0.207775 |
| FAM90A1   | 0.595746 | 0.604066 | 0.02001  | 0.692228 |
| CCDC114   | 0.305848 | 0.327844 | 0.100195 | 0.252931 |
| SLC43A3   | 0.359576 | 0.360363 | 0.003154 | 0.946164 |
| RELL1     | 0.343326 | 0.355928 | 0.052006 | 0.18214  |
| C3orf21   | 0.538251 | 0.534988 | -0.00877 | 0.555796 |
| CHAT      | 0.460219 | 0.405206 | -0.18366 | 0.031623 |
| TEX12     | 0.883602 | 0.878614 | -0.00817 | 0.396659 |
| CCL22     | 0.516769 | 0.492219 | -0.07022 | 0.019643 |

|           |          |          |          |          |
|-----------|----------|----------|----------|----------|
| ERCC6     | 0.389592 | 0.393085 | 0.012876 | 0.543373 |
| SSR3      | 0.203466 | 0.20266  | -0.00573 | 1        |
| TBC1D20   | 0.122713 | 0.12485  | 0.024903 | 0.52956  |
| ETAA1     | 0.073138 | 0.069995 | -0.06337 | 0.376258 |
| SAMD14    | 0.401566 | 0.401409 | -0.00056 | 0.866861 |
| RAP1A     | 0.066174 | 0.068812 | 0.05641  | 0.330399 |
| CLTB      | 0.308464 | 0.310232 | 0.008243 | 0.779929 |
| MT1DP     | 0.144228 | 0.125473 | -0.20097 | 0.262724 |
| SPIN1     | 0.202721 | 0.207082 | 0.030702 | 0.373753 |
| FAM188B   | 0.237977 | 0.235053 | -0.01783 | 0.400591 |
| LRCH2     | 0.231725 | 0.231992 | 0.001658 | 0.973995 |
| COL17A1   | 0.669966 | 0.643926 | -0.05719 | 0.014678 |
| UBR4      | 0.465791 | 0.470906 | 0.015757 | 0.48776  |
| PEX19     | 0.109292 | 0.110703 | 0.018508 | 0.499518 |
| TM4SF1    | 0.563237 | 0.580916 | 0.044586 | 0.337399 |
| EIF4EBP2  | 0.174176 | 0.176016 | 0.015167 | 0.610102 |
| CACNA1S   | 0.477522 | 0.465381 | -0.03715 | 0.171691 |
| C6orf70   | 0.430508 | 0.436215 | 0.018998 | 0.263716 |
| CLEC4A    | 0.781498 | 0.792833 | 0.020775 | 0.405828 |
| MLLT11    | 0.166504 | 0.166762 | 0.002236 | 0.796055 |
| HNRPLL    | 0.308805 | 0.315137 | 0.029283 | 0.557361 |
| SUSD5     | 0.319103 | 0.34252  | 0.102166 | 0.069343 |
| ZNF597    | 0.221651 | 0.238769 | 0.107323 | 0.281006 |
| SLC35D3   | 0.188434 | 0.197294 | 0.066284 | 0.363831 |
| PPP4R4    | 0.248334 | 0.229979 | -0.11078 | 0.035913 |
| CSPP1     | 0.147341 | 0.148681 | 0.01306  | 0.427197 |
| KIF15     | 0.075725 | 0.082108 | 0.116743 | 0.077963 |
| DDOST     | 0.197824 | 0.198138 | 0.002287 | 0.747965 |
| KCNQ4     | 0.48944  | 0.479088 | -0.03084 | 0.308904 |
| DGKB      | 0.311291 | 0.34379  | 0.143265 | 0.000236 |
| LPPR3     | 0.475745 | 0.479916 | 0.012593 | 0.532613 |
| GOLGB1    | 0.054124 | 0.053569 | -0.01485 | 0.769226 |
| RAD51C    | 0.014299 | 0.017416 | 0.284416 | 0.560234 |
| MYO15B    | 0.28152  | 0.287635 | 0.031003 | 0.619926 |
| LOC11643  | 0.610832 | 0.609018 | -0.00429 | 0.861367 |
| SCYL1     | 0.163133 | 0.163954 | 0.007245 | 0.500998 |
| NR4A2     | 0.28263  | 0.280912 | -0.0088  | 0.557361 |
| NUF2      | 0.117362 | 0.120002 | 0.032099 | 0.214584 |
| FOXD4L3   | 0.2012   | 0.226436 | 0.170475 | 0.32124  |
| TEX2      | 0.347858 | 0.343174 | -0.01956 | 0.514426 |
| LRRC8C    | 0.187831 | 0.193687 | 0.044292 | 0.212871 |
| CIB3      | 0.295023 | 0.294773 | -0.00122 | 0.670033 |
| AATF      | 0.303116 | 0.304069 | 0.004529 | 0.565208 |
| C12orf42  | 0.185439 | 0.181811 | -0.02851 | 0.336229 |
| METTL1    | 0.084367 | 0.089518 | 0.085493 | 0.072988 |
| ACSF3     | 0.452389 | 0.50887  | 0.169733 | 0.032181 |
| PPIAL4A   | 0.532525 | 0.550987 | 0.04917  | 0.439499 |
| WDR51B    | 0.201346 | 0.201801 | 0.003256 | 0.894414 |
| PRMT7     | 0.193937 | 0.194251 | 0.002332 | 0.649796 |
| DYRK4     | 0.45822  | 0.42635  | -0.104   | 0.020899 |
| FAM195A   | 0.277469 | 0.276514 | -0.00497 | 0.711217 |
| TRAF7     | 0.580788 | 0.576671 | -0.01026 | 0.436746 |
| NKX2.8    | 0.047406 | 0.047941 | 0.016207 | 0.443638 |
| SORCS2    | 0.484556 | 0.464733 | -0.06026 | 0.002287 |
| KRTAP19.3 | 0.390605 | 0.40728  | 0.06031  | 0.48049  |
| FOXF1     | 0.091985 | 0.089099 | -0.04599 | 0.563633 |

|           |          |          |          |          |
|-----------|----------|----------|----------|----------|
| FAM115C   | 0.031291 | 0.030652 | -0.02978 | 0.624839 |
| PGBD4     | 0.302074 | 0.30466  | 0.012295 | 0.427196 |
| SVOPL     | 0.439721 | 0.450888 | 0.036179 | 0.308903 |
| RBM3      | 0.247936 | 0.260691 | 0.072373 | 0.355285 |
| DACH2     | 0.142113 | 0.156666 | 0.140652 | 0.246228 |
| FAM178A   | 0.197119 | 0.204555 | 0.053416 | 0.055031 |
| LOC65036  | 0.147141 | 0.134363 | -0.13107 | 0.207784 |
| PLAG1     | 0.268004 | 0.255808 | -0.06719 | 0.408468 |
| TXNDC11   | 0.309    | 0.31543  | 0.02971  | 0.225977 |
| KIR2DL4   | 0.284866 | 0.280677 | -0.02137 | 0.457622 |
| KIAA0528  | 0.130938 | 0.133471 | 0.027647 | 0.419109 |
| TUBB4     | 0.36603  | 0.374467 | 0.032877 | 0.821312 |
| CENPP     | 0.431386 | 0.438033 | 0.022061 | 0.629817 |
| TCEB3CL   | 0.220862 | 0.225991 | 0.033119 | 0.33975  |
| CYP4Z2P   | 0.274423 | 0.268126 | -0.03349 | 0.874194 |
| GPR19     | 0.217965 | 0.212458 | -0.03692 | 0.291525 |
| MRM1      | 0.183851 | 0.182989 | -0.00678 | 0.613368 |
| CDKN1A    | 0.286533 | 0.279075 | -0.03805 | 0.163799 |
| FKBP11    | 0.127054 | 0.134982 | 0.087332 | 0.42449  |
| SSTR3     | 0.610154 | 0.592415 | -0.04257 | 0.276869 |
| GGN       | 0.475525 | 0.495965 | 0.060716 | 0.150159 |
| WBP2NL    | 0.474707 | 0.509032 | 0.10072  | 0.016895 |
| MIR518B   | 0.32439  | 0.328388 | 0.017674 | 0.651474 |
| TP73      | 0.413192 | 0.416381 | 0.011093 | 0.832195 |
| ZNF550    | 0.387124 | 0.382368 | -0.01783 | 0.428555 |
| FDX1      | 0.251018 | 0.240439 | -0.06212 | 0.084462 |
| ADAM23    | 0.315524 | 0.317413 | 0.008613 | 0.817692 |
| MSH3      | 0.324937 | 0.328137 | 0.014137 | 0.425842 |
| CALY      | 0.076866 | 0.074767 | -0.03995 | 0.403203 |
| MIER1     | 0.132089 | 0.134269 | 0.023619 | 0.172422 |
| MIR181D   | 0.785726 | 0.774607 | -0.02056 | 0.304484 |
| DVL2      | 0.367153 | 0.368126 | 0.003818 | 0.668337 |
| PSEN1     | 0.237711 | 0.240708 | 0.018073 | 0.532613 |
| KRTAP5.3  | 0.329436 | 0.30289  | -0.12121 | 0.370014 |
| ACPP      | 0.581194 | 0.571432 | -0.02444 | 0.503968 |
| GTSF1L    | 0.687493 | 0.674986 | -0.02649 | 0.067925 |
| ENPP3     | 0.425101 | 0.46101  | 0.116991 | 0.146888 |
| C1orf25   | 0.074732 | 0.078855 | 0.077473 | 0.022912 |
| RABGGTA   | 0.287155 | 0.283653 | -0.0177  | 0.60035  |
| TPM4      | 0.378296 | 0.378657 | 0.001377 | 0.769229 |
| STARD6    | 0.441842 | 0.438635 | -0.01051 | 0.659884 |
| LCN15     | 0.571478 | 0.555731 | -0.04031 | 0.2779   |
| TNFAIP8L1 | 0.380083 | 0.368243 | -0.04566 | 0.131939 |
| RGAG1     | 0.682582 | 0.666481 | -0.03444 | 0.349256 |
| BCR       | 0.272275 | 0.271621 | -0.00347 | 0.603593 |
| ZNF625    | 0.211394 | 0.206527 | -0.0336  | 0.41244  |
| ZZEF1     | 0.442073 | 0.446179 | 0.013336 | 0.395392 |
| CAMK1G    | 0.386866 | 0.36618  | -0.07928 | 0.000961 |
| NUDT16L1  | 0.080809 | 0.083397 | 0.045482 | 0.256814 |
| PEX11G    | 0.295074 | 0.293    | -0.01018 | 0.427196 |
| KCMF1     | 0.248753 | 0.248934 | 0.001049 | 0.810463 |
| LMCD1     | 0.364461 | 0.363203 | -0.00499 | 0.762121 |
| TESC      | 0.530894 | 0.518762 | -0.03335 | 0.052713 |
| MECP2     | 0.260846 | 0.268255 | 0.040406 | 0.299046 |
| SMPDL3B   | 0.165564 | 0.161269 | -0.03792 | 0.293662 |
| ALG9      | 0.161641 | 0.14686  | -0.13835 | 0.013582 |

|          |          |          |           |          |
|----------|----------|----------|-----------|----------|
| TMEM120f | 0.362673 | 0.357492 | -0.02076  | 0.275841 |
| CACNG1   | 0.719533 | 0.701448 | -0.03673  | 0.007464 |
| C16orf46 | 0.121175 | 0.125772 | 0.053712  | 0.068629 |
| DGCR8    | 0.422452 | 0.422246 | -0.0007   | 0.948018 |
| KHDRBS2  | 0.090962 | 0.09711  | 0.094353  | 0.072989 |
| HPGDS    | 0.506388 | 0.507773 | 0.003941  | 0.218915 |
| FSIP1    | 0.27303  | 0.266193 | -0.03659  | 0.204441 |
| OR7G3    | 0.314957 | 0.286591 | -0.13616  | 0.202787 |
| MIR1227  | 0.216964 | 0.218367 | 0.009302  | 0.881538 |
| CAPN3    | 0.429438 | 0.43463  | 0.017339  | 0.296883 |
| FAM84A   | 0.087911 | 0.088967 | 0.017236  | 0.425839 |
| SUMO1P1  | 0.368648 | 0.360965 | -0.03039  | 0.653152 |
| SLCO1B3  | 0.155585 | 0.182581 | 0.230829  | 0.069343 |
| KANK3    | 0.174737 | 0.171862 | -0.02394  | 0.474715 |
| YWHAQ    | 0.327216 | 0.338278 | 0.047963  | 0.049932 |
| PRDM9    | 0.38326  | 0.435088 | 0.182984  | 0.089616 |
| IGDCC3   | 0.498161 | 0.487586 | -0.03095  | 0.160305 |
| CHM      | 0.318229 | 0.318872 | 0.002913  | 0.610102 |
| RASGRP3  | 0.276185 | 0.300636 | 0.122384  | 0.056824 |
| TBC1D14  | 0.400911 | 0.396145 | -0.01725  | 0.272775 |
| AGTR1    | 0.378462 | 0.404232 | 0.095032  | 0.136784 |
| IGF2     | 0.584542 | 0.523068 | -0.16031  | 0.060238 |
| ADAM3A   | 0.597519 | 0.581652 | -0.03883  | 0.501    |
| SNX10    | 0.273497 | 0.268344 | -0.02744  | 0.428554 |
| ADAL     | 0.162245 | 0.164155 | 0.016882  | 0.592274 |
| C18orf32 | 0.143269 | 0.135305 | -0.08251  | 0.188321 |
| UBE2H    | 0.394086 | 0.399161 | 0.018461  | 0.262721 |
| IQCE     | 0.57517  | 0.572085 | -0.00776  | 0.490683 |
| UTP14A   | 0.239653 | 0.258495 | 0.109185  | 0.092287 |
| THAP2    | 0.147471 | 0.150957 | 0.033702  | 0.358929 |
| EIF2AK3  | 0.153824 | 0.151359 | -0.02331  | 0.534145 |
| C5orf56  | 0.314009 | 0.310832 | -0.01467  | 0.815883 |
| MTMR14   | 0.249976 | 0.247138 | -0.01647  | 0.305594 |
| BTN2A3   | 0.220843 | 0.223531 | 0.017455  | 0.728639 |
| ABCC12   | 0.527662 | 0.561497 | 0.089665  | 0.138638 |
| CYP24A1  | 0.158969 | 0.163004 | 0.036163  | 0.735648 |
| DEDD     | 0.391364 | 0.391274 | -0.00033  | 0.973995 |
| CST2     | 0.412601 | 0.407541 | -0.0178   | 0.744439 |
| TSPAN13  | 0.096231 | 0.098718 | 0.03681   | 0.388952 |
| CPNE9    | 0.262242 | 0.250845 | -0.0641   | 0.059921 |
| FAM35B2  | 0.431393 | 0.418883 | -0.04245  | 0.460446 |
| ARID3A   | 0.451769 | 0.433094 | -0.06091  | 0.019643 |
| TAAR3    | 0.365903 | 0.413127 | 0.175125  | 0.108138 |
| LGALS2   | 0.44044  | 0.351529 | -0.3253   | 0.000693 |
| MGC1029f | 0.689456 | 0.665364 | -0.05131  | 0.090054 |
| GLCE     | 0.842281 | 0.862693 | 0.034546  | 0.944309 |
| C6orf59  | 0.144503 | 0.154027 | 0.092084  | 0.291527 |
| OLA1     | 0.402273 | 0.418105 | 0.055691  | 0.113876 |
| MED23    | 0.224892 | 0.233111 | 0.051785  | 0.322376 |
| SLC39A4  | 0.634927 | 0.629339 | -0.01275  | 0.436747 |
| WDR3     | 0.263021 | 0.259037 | -0.02202  | 0.476155 |
| NLRP11   | 0.298567 | 0.312511 | 0.065854  | 0.232289 |
| TREM1    | 0.488236 | 0.475289 | -0.03877  | 0.704291 |
| FAIM     | 0.089244 | 0.091015 | 0.028344  | 0.117648 |
| RAI1     | 0.406954 | 0.406931 | -8.29E-05 | 0.848579 |
| DEFB105B | 0.673402 | 0.698116 | 0.052     | 0.394097 |

|          |          |          |          |          |
|----------|----------|----------|----------|----------|
| NRG2     | 0.240541 | 0.224541 | -0.09931 | 0.01811  |
| PDPN     | 0.311867 | 0.289346 | -0.10813 | 0.929495 |
| INPP5D   | 0.545347 | 0.562682 | 0.045148 | 0.718168 |
| SPTBN4   | 0.358042 | 0.33355  | -0.10222 | 0.118747 |
| RASSF10  | 0.075204 | 0.065759 | -0.19364 | 0.004947 |
| GEMIN6   | 0.115958 | 0.110388 | -0.07102 | 0.41911  |
| MIR1204  | 0.171935 | 0.139328 | -0.30337 | 0.017439 |
| FMNL1    | 0.255039 | 0.253527 | -0.00858 | 0.424491 |
| BASP1    | 0.398079 | 0.418966 | 0.073779 | 0.011298 |
| KCNJ16   | 0.554769 | 0.509235 | -0.12356 | 0.130158 |
| LOC10013 | 0.495706 | 0.486426 | -0.02726 | 0.159613 |
| C2orf3   | 0.203158 | 0.201403 | -0.01252 | 0.678536 |
| CCDC42   | 0.327755 | 0.313323 | -0.06497 | 0.405832 |
| H2AFZ    | 0.050547 | 0.050678 | 0.003737 | 0.53874  |
| ZFP14    | 0.848483 | 0.849759 | 0.002167 | 0.95729  |
| TMEM68   | 0.128039 | 0.129082 | 0.011702 | 0.636447 |
| EIF4E3   | 0.416015 | 0.413447 | -0.00893 | 0.499519 |
| SNORD11f | 0.612715 | 0.627519 | 0.034442 | 0.308904 |
| ANPEP    | 0.472419 | 0.461899 | -0.03249 | 0.230471 |
| C1orf124 | 0.155663 | 0.159039 | 0.030956 | 0.454805 |
| CMTM6    | 0.120218 | 0.125779 | 0.065234 | 0.283088 |
| ZNF404   | 0.620189 | 0.655048 | 0.078893 | 0.123781 |
| GPRASP2  | 0.169456 | 0.182027 | 0.103249 | 0.894414 |
| LPL      | 0.432408 | 0.420327 | -0.04088 | 0.356498 |
| GPR87    | 0.376401 | 0.400537 | 0.089667 | 0.15755  |
| C14orf50 | 0.256072 | 0.237541 | -0.10837 | 0.022088 |
| PRDM10   | 0.473544 | 0.475035 | 0.004536 | 0.746201 |
| LOC65365 | 0.316089 | 0.317057 | 0.004409 | 0.874194 |
| HLA.L    | 0.146167 | 0.153608 | 0.071639 | 0.082797 |
| RPL35A   | 0.0762   | 0.074279 | -0.03684 | 0.56049  |
| SLC18A2  | 0.314698 | 0.3296   | 0.066747 | 0.035503 |
| LAT2     | 0.313385 | 0.270578 | -0.21189 | 0.000681 |
| ATP2A3   | 0.434881 | 0.419213 | -0.05294 | 0.025094 |
| TEX14    | 0.287832 | 0.28662  | -0.00609 | 0.546465 |
| ST8SIA1  | 0.27351  | 0.276948 | 0.018022 | 0.666639 |
| OR6F1    | 0.257003 | 0.26798  | 0.060344 | 0.643108 |
| ELN      | 0.426759 | 0.410807 | -0.05496 | 0.074492 |
| FAM168A  | 0.296826 | 0.299317 | 0.012056 | 0.403204 |
| RTCD1    | 0.220123 | 0.225051 | 0.031943 | 0.077571 |
| KRT14    | 0.647126 | 0.618291 | -0.06576 | 0.019889 |
| CCNC     | 0.113989 | 0.118401 | 0.054776 | 0.034896 |
| TMEM151  | 0.401698 | 0.401968 | 0.000969 | 0.66157  |
| VASP     | 0.127266 | 0.129713 | 0.02747  | 0.358931 |
| MYH8     | 0.40124  | 0.395206 | -0.02186 | 0.66326  |
| NXPH4    | 0.230073 | 0.202102 | -0.18701 | 0.005394 |
| DLL4     | 0.35087  | 0.341459 | -0.03922 | 0.19626  |
| SAMSN1   | 0.392875 | 0.48572  | 0.306054 | 0.093646 |
| TAS1R3   | 0.508025 | 0.516475 | 0.0238   | 0.728639 |
| TREX2    | 0.681523 | 0.674578 | -0.01478 | 0.551122 |
| NOC4L    | 0.526683 | 0.528142 | 0.00399  | 0.861368 |
| ADAMTS1  | 0.434301 | 0.428081 | -0.02081 | 0.656514 |
| C1orf94  | 0.43833  | 0.41541  | -0.07748 | 0.223312 |
| PANK3    | 0.160899 | 0.162107 | 0.010791 | 0.506941 |
| NUP43    | 0.259732 | 0.264065 | 0.023868 | 0.489224 |
| GPHB5    | 0.663438 | 0.683251 | 0.042454 | 0.566783 |
| FHIT     | 0.478064 | 0.476374 | -0.00511 | 0.890732 |

|          |          |          |          |          |
|----------|----------|----------|----------|----------|
| HTR1A    | 0.083967 | 0.084627 | 0.011295 | 0.242453 |
| TXNL1    | 0.124335 | 0.125225 | 0.010296 | 0.815883 |
| BAALC    | 0.488665 | 0.480538 | -0.0242  | 0.130154 |
| KRTAP4.5 | 0.690121 | 0.666526 | -0.05019 | 0.257795 |
| GSX1     | 0.059142 | 0.062519 | 0.080114 | 0.451991 |
| WDR17    | 0.147081 | 0.150086 | 0.02918  | 0.326951 |
| SQLE     | 0.106637 | 0.107566 | 0.012518 | 0.275839 |
| GPRC5A   | 0.181615 | 0.175097 | -0.05273 | 0.015553 |
| C1orf100 | 0.322665 | 0.33465  | 0.052614 | 0.042792 |
| ZNF799   | 0.031069 | 0.030768 | -0.01402 | 0.887035 |
| ADAM15   | 0.302022 | 0.303139 | 0.005323 | 0.874194 |
| SLC2A11  | 0.270339 | 0.262644 | -0.04166 | 0.04046  |
| OR4X1    | 0.193328 | 0.183956 | -0.07169 | 0.179862 |
| RNF5     | 0.511597 | 0.534575 | 0.063385 | 0.01616  |
| FAM189B  | 0.237795 | 0.24468  | 0.041181 | 0.210316 |
| CCL26    | 0.503    | 0.487345 | -0.04562 | 0.597115 |
| OR9I1    | 0.390579 | 0.323333 | -0.27259 | 0.049123 |
| ORC5L    | 0.178682 | 0.171647 | -0.05795 | 0.052431 |
| CREB3    | 0.104961 | 0.099647 | -0.07495 | 0.443645 |
| CADPS2   | 0.255218 | 0.26057  | 0.02994  | 0.653153 |
| PAGE5    | 0.389254 | 0.401052 | 0.043075 | 0.404518 |
| PIGY     | 0.227127 | 0.222614 | -0.02896 | 0.477598 |
| LOC34009 | 0.192174 | 0.204539 | 0.089968 | 0.213727 |
| ATP10A   | 0.438936 | 0.440815 | 0.006162 | 0.648122 |
| LACTB2   | 0.160289 | 0.161367 | 0.009672 | 0.808659 |
| ZNF780A  | 0.169516 | 0.172843 | 0.028047 | 0.49804  |
| C19orf48 | 0.250017 | 0.246227 | -0.02204 | 0.616642 |
| ABCA2    | 0.727354 | 0.716697 | -0.0213  | 0.041378 |
| INHBC    | 0.672341 | 0.667272 | -0.01092 | 0.182142 |
| KIF20B   | 0.089581 | 0.088779 | -0.01297 | 0.56994  |
| DUSP2    | 0.431298 | 0.410299 | -0.07201 | 0.13926  |
| ATP1A1   | 0.277241 | 0.287238 | 0.051106 | 0.119852 |
| PRDX5    | 0.123789 | 0.124522 | 0.008515 | 0.618283 |
| ACER2    | 0.225393 | 0.227801 | 0.015331 | 0.544918 |
| TMEM159  | 0.454583 | 0.436594 | -0.05825 | 0.528037 |
| BCYRN1   | 0.384323 | 0.379547 | -0.01804 | 0.565208 |
| DNHD1    | 0.667334 | 0.694024 | 0.056576 | 0.08446  |
| LOC10012 | 0.554333 | 0.565339 | 0.028365 | 0.577872 |
| GOLT1A   | 0.208204 | 0.238615 | 0.196684 | 0.294732 |
| GRB7     | 0.264439 | 0.233054 | -0.18227 | 0.304497 |
| IRS1     | 0.331189 | 0.340704 | 0.040866 | 0.277898 |
| LOC28373 | 0.113878 | 0.120212 | 0.078085 | 0.839468 |
| LOC44120 | 0.197694 | 0.193117 | -0.03379 | 0.1638   |
| NR1I2    | 0.508578 | 0.513511 | 0.013925 | 0.523476 |
| EBAG9    | 0.136305 | 0.138836 | 0.026542 | 0.680241 |
| MID2     | 0.168987 | 0.18168  | 0.104485 | 0.721653 |
| HSPA13   | 0.079367 | 0.076547 | -0.0522  | 0.544914 |
| SHD      | 0.243822 | 0.240696 | -0.01862 | 0.569941 |
| PNPLA2   | 0.507921 | 0.514691 | 0.019103 | 0.302307 |
| MFSD1    | 0.243004 | 0.252196 | 0.053567 | 0.205274 |
| UBE2L3   | 0.138518 | 0.139449 | 0.009658 | 0.931345 |
| SCGB1C1  | 0.40654  | 0.418377 | 0.041409 | 0.268725 |
| SLC8A3   | 0.293058 | 0.285431 | -0.03804 | 0.146888 |
| EPN3     | 0.392244 | 0.374659 | -0.06617 | 0.003082 |
| FAM47A   | 0.602527 | 0.674615 | 0.163039 | 0.07299  |
| C2CD4D   | 0.122796 | 0.129162 | 0.072916 | 0.760325 |

|           |          |          |          |          |
|-----------|----------|----------|----------|----------|
| GNG3      | 0.378267 | 0.467887 | 0.306757 | 0.001851 |
| FUT4      | 0.451963 | 0.465364 | 0.042155 | 0.243395 |
| LOC100121 | 0.191716 | 0.18562  | -0.04662 | 0.264714 |
| TBC1D3P2  | 0.482077 | 0.484952 | 0.008578 | 0.896256 |
| AMOTL1    | 0.419754 | 0.409957 | -0.03407 | 0.136173 |
| PI4KAP1   | 0.647827 | 0.676761 | 0.063039 | 0.154831 |
| VLDLR     | 0.069122 | 0.070297 | 0.024331 | 0.603592 |
| RAB33A    | 0.244437 | 0.257952 | 0.077643 | 0.44503  |
| ERH       | 0.036338 | 0.039028 | 0.103026 | 0.248119 |
| MIR374A   | 0.75296  | 0.78346  | 0.057286 | 0.061197 |
| USP12     | 0.266344 | 0.269114 | 0.014922 | 0.427198 |
| AHI1      | 0.294478 | 0.301419 | 0.033609 | 0.435375 |
| USP50     | 0.303121 | 0.319195 | 0.074545 | 0.044737 |
| MYO18A    | 0.517429 | 0.508583 | -0.02488 | 0.152147 |
| NUP98     | 0.294624 | 0.296848 | 0.01085  | 0.666642 |
| OR2A25    | 0.541424 | 0.56064  | 0.050315 | 0.728638 |
| RAB13     | 0.265133 | 0.232667 | -0.18845 | 0.065847 |
| SNORD1A   | 0.593831 | 0.535702 | -0.14862 | 0.055327 |
| DPP7      | 0.396593 | 0.39446  | -0.00778 | 0.896256 |
| HTR2B     | 0.622378 | 0.599617 | -0.05375 | 0.231378 |
| NR2F2     | 0.128291 | 0.130566 | 0.025364 | 0.678536 |
| MIR548F5  | 0.398585 | 0.41045  | 0.042322 | 0.167351 |
| DHFR      | 0.257347 | 0.253097 | -0.02403 | 0.546466 |
| TRIM65    | 0.432033 | 0.426103 | -0.01994 | 0.152814 |
| LEMD1     | 0.77908  | 0.763505 | -0.02913 | 0.060237 |
| OR5AR1    | 0.329878 | 0.37123  | 0.17038  | 0.606843 |
| LOC64533  | 0.039657 | 0.040978 | 0.047275 | 0.549554 |
| ZSCAN1    | 0.301    | 0.29355  | -0.03616 | 0.382573 |
| TRPM5     | 0.587555 | 0.578872 | -0.02148 | 0.714689 |
| CCDC87    | 0.177273 | 0.181157 | 0.031266 | 0.188321 |
| SPDYE3    | 0.784823 | 0.791862 | 0.012882 | 0.179858 |
| TUBB2A    | 0.18256  | 0.188288 | 0.044571 | 0.246228 |
| FASTKD2   | 0.238759 | 0.239392 | 0.003817 | 0.425843 |
| MEF2D     | 0.332923 | 0.333212 | 0.001251 | 0.890732 |
| MIR1281   | 0.116681 | 0.109911 | -0.08623 | 0.355285 |
| DYNLL1    | 0.127735 | 0.129085 | 0.015167 | 0.563634 |
| SUNC1     | 0.358693 | 0.340128 | -0.07667 | 0.329257 |
| GEM       | 0.293668 | 0.288939 | -0.02342 | 0.450602 |
| RFPL3S    | 0.22064  | 0.223506 | 0.018622 | 0.687082 |
| MIR220A   | 0.699727 | 0.741848 | 0.084332 | 0.196258 |
| CHRNE     | 0.409842 | 0.449801 | 0.134219 | 0.126072 |
| CD207     | 0.419637 | 0.434033 | 0.048663 | 0.644776 |
| COIL      | 0.138105 | 0.142065 | 0.040786 | 0.074871 |
| BTBD12    | 0.5092   | 0.509516 | 0.000896 | 0.912856 |
| PADI4     | 0.335371 | 0.318576 | -0.07412 | 0.210316 |
| PILRA     | 0.525508 | 0.519149 | -0.01756 | 0.420449 |
| CNPY2     | 0.15204  | 0.148618 | -0.03284 | 0.445031 |
| MIR124.2  | 0.071562 | 0.070192 | -0.02788 | 0.613364 |
| FANCD2    | 0.283265 | 0.288679 | 0.027315 | 0.483391 |
| PLAU      | 0.179355 | 0.168    | -0.09436 | 0.006004 |
| ZBED5     | 0.03821  | 0.037874 | -0.01276 | 0.656494 |
| CALB1     | 0.218317 | 0.219803 | 0.009783 | 0.489222 |
| SPRR2E    | 0.336548 | 0.322287 | -0.06247 | 0.358932 |
| KIAA0247  | 0.404812 | 0.406074 | 0.00449  | 0.933197 |
| WFDC11    | 0.210859 | 0.228826 | 0.117977 | 0.182905 |
| GNL2      | 0.173032 | 0.170128 | -0.02442 | 0.571524 |

|           |          |          |          |          |
|-----------|----------|----------|----------|----------|
| SPTBN2    | 0.766539 | 0.759929 | -0.0125  | 0.247171 |
| LOC28483  | 0.208548 | 0.217526 | 0.060809 | 0.316716 |
| PCTP      | 0.29341  | 0.292632 | -0.00383 | 0.269733 |
| KNTC1     | 0.105312 | 0.106704 | 0.018941 | 0.503965 |
| C1orf14   | 0.60539  | 0.634118 | 0.066888 | 0.105105 |
| LAMC1     | 0.38681  | 0.3922   | 0.019966 | 0.404515 |
| C20orf3   | 0.255153 | 0.24064  | -0.08449 | 0.111238 |
| DEGS2     | 0.367468 | 0.356924 | -0.042   | 0.116021 |
| DMPK      | 0.47365  | 0.469071 | -0.01401 | 0.574694 |
| NDUFB11   | 0.174481 | 0.199015 | 0.189807 | 0.097349 |
| DPM1      | 0.232252 | 0.236094 | 0.023667 | 0.324658 |
| SERPINA3  | 0.339521 | 0.313508 | -0.115   | 0.020515 |
| MIR515.2  | 0.193438 | 0.191138 | -0.01725 | 0.544918 |
| HIAT1     | 0.132104 | 0.133615 | 0.016406 | 0.419109 |
| PGLYRP4   | 0.445881 | 0.386521 | -0.20611 | 0.060239 |
| NUP85     | 0.213708 | 0.211006 | -0.01836 | 0.693947 |
| C7orf27   | 0.423263 | 0.417761 | -0.01888 | 0.232288 |
| CCDC135   | 0.570117 | 0.5502   | -0.0513  | 0.05992  |
| S100A13   | 0.594666 | 0.579765 | -0.03661 | 0.103616 |
| HDAC6     | 0.297094 | 0.307449 | 0.04943  | 0.111239 |
| ATP1B4    | 0.555398 | 0.534941 | -0.05414 | 0.438119 |
| GABPB2    | 0.149815 | 0.156952 | 0.067142 | 0.584253 |
| NARG2     | 0.163372 | 0.167052 | 0.032136 | 0.355284 |
| OTOS      | 0.364395 | 0.339633 | -0.10153 | 0.194654 |
| LHX9      | 0.140777 | 0.155789 | 0.146173 | 0.285181 |
| C3orf30   | 0.632737 | 0.687248 | 0.119225 | 0.019643 |
| THNSL2    | 0.430694 | 0.452999 | 0.072844 | 0.106109 |
| COL4A2    | 0.530827 | 0.533445 | 0.007096 | 0.697388 |
| TMEM89    | 0.715423 | 0.704247 | -0.02272 | 0.057737 |
| C12orf61  | 0.048132 | 0.04682  | -0.03986 | 0.499495 |
| CXorf57   | 0.135107 | 0.1546   | 0.194435 | 0.107628 |
| CRBN      | 0.185323 | 0.184465 | -0.0067  | 0.996284 |
| FNDC5     | 0.379523 | 0.382832 | 0.012524 | 0.628161 |
| SH2D3C    | 0.388746 | 0.386691 | -0.00765 | 0.623208 |
| OR4D10    | 0.439445 | 0.516316 | 0.232574 | 0.008167 |
| C11orf65  | 0.061952 | 0.053283 | -0.21746 | 0.108648 |
| UQCRRFS1  | 0.218712 | 0.215128 | -0.02384 | 0.365061 |
| LOC100131 | 0.308803 | 0.313776 | 0.023049 | 0.785293 |
| ENHO      | 0.291096 | 0.299888 | 0.042928 | 0.214586 |
| NR4A3     | 0.207273 | 0.194535 | -0.0915  | 0.049661 |
| OR10K2    | 0.314695 | 0.324396 | 0.0438   | 0.634787 |
| PFKFB3    | 0.405836 | 0.417084 | 0.039441 | 0.094102 |
| MRPS21    | 0.293808 | 0.28906  | -0.02351 | 0.456212 |
| OR4N2     | 0.313488 | 0.29199  | -0.10249 | 0.338574 |
| PLA2G16   | 0.087493 | 0.085337 | -0.03601 | 0.350454 |
| NOMO1     | 0.402887 | 0.395934 | -0.02511 | 0.368772 |
| PROKR2    | 0.469148 | 0.491274 | 0.066486 | 0.362603 |
| M6PR      | 0.088935 | 0.086813 | -0.03485 | 0.300129 |
| DFNB31    | 0.312329 | 0.283941 | -0.13747 | 0.060239 |
| DSCAML1   | 0.59537  | 0.592108 | -0.00793 | 0.361373 |
| KIR3DX1   | 0.160354 | 0.160071 | -0.00255 | 0.721653 |
| CMAS      | 0.229167 | 0.227261 | -0.01205 | 0.706019 |
| VHL       | 0.241242 | 0.249733 | 0.049905 | 0.338573 |
| LPCAT1    | 0.683293 | 0.679697 | -0.00761 | 0.70256  |
| MT1F      | 0.154346 | 0.15218  | -0.02038 | 0.796055 |
| BBS10     | 0.123553 | 0.127691 | 0.047519 | 0.176858 |

|           |          |          |          |          |
|-----------|----------|----------|----------|----------|
| DLEU1     | 0.066909 | 0.067956 | 0.022409 | 0.372501 |
| LOC59510  | 0.238661 | 0.24118  | 0.015153 | 0.506944 |
| TTC31     | 0.056047 | 0.060553 | 0.111573 | 0.009425 |
| XPO7      | 0.437714 | 0.438719 | 0.003309 | 0.742678 |
| TMC6      | 0.377886 | 0.351313 | -0.10519 | 0.054444 |
| CCR6      | 0.494486 | 0.48726  | -0.02124 | 0.500999 |
| MARVELD1  | 0.237438 | 0.211478 | -0.16704 | 0.004153 |
| RRM1      | 0.115647 | 0.117694 | 0.025321 | 0.349255 |
| MFAP2     | 0.217492 | 0.210004 | -0.05055 | 0.128392 |
| RGS1      | 0.813414 | 0.848706 | 0.061275 | 0.03911  |
| ABCC1     | 0.474531 | 0.470509 | -0.01228 | 0.887052 |
| SLC22A18  | 0.257508 | 0.25083  | -0.03791 | 0.450601 |
| PAH       | 0.2558   | 0.244538 | -0.06496 | 0.431275 |
| C15orf23  | 0.151287 | 0.153262 | 0.018709 | 0.222428 |
| USP25     | 0.366158 | 0.379795 | 0.052753 | 0.215447 |
| LOC90246  | 0.17458  | 0.166334 | -0.06981 | 0.082798 |
| HIST1H4B  | 0.233471 | 0.231454 | -0.01252 | 0.940605 |
| ASB11     | 0.60899  | 0.643851 | 0.080307 | 0.031439 |
| VPS16     | 0.436753 | 0.436999 | 0.00081  | 0.907318 |
| ALOX15B   | 0.34141  | 0.32723  | -0.0612  | 0.740918 |
| DNAJC22   | 0.127349 | 0.115928 | -0.13555 | 0.013146 |
| DGCR2     | 0.351414 | 0.351654 | 0.000985 | 0.790669 |
| HEATR4    | 0.280508 | 0.278761 | -0.00902 | 0.511427 |
| FLJ31306  | 0.064984 | 0.062497 | -0.05629 | 0.797851 |
| C1QTNF6   | 0.363779 | 0.337767 | -0.10703 | 0.014213 |
| CCDC85C   | 0.376943 | 0.375963 | -0.00376 | 0.66157  |
| MRPS12    | 0.152975 | 0.155185 | 0.020696 | 0.158235 |
| TES       | 0.247312 | 0.234968 | -0.07387 | 0.61337  |
| TMEM150   | 0.15963  | 0.159209 | -0.00381 | 0.7462   |
| MACROD1   | 0.463841 | 0.457245 | -0.02066 | 0.253896 |
| ACCS      | 0.359345 | 0.360599 | 0.005028 | 0.890733 |
| APC2      | 0.535903 | 0.539762 | 0.010352 | 0.435377 |
| UBIAD1    | 0.090543 | 0.091477 | 0.014808 | 0.532612 |
| RALYL     | 0.159434 | 0.166489 | 0.062468 | 0.33623  |
| C20orf103 | 0.163667 | 0.157371 | -0.05659 | 0.301218 |
| NCAPD2    | 0.138179 | 0.136842 | -0.01403 | 0.626511 |
| MYH13     | 0.226607 | 0.231232 | 0.029149 | 0.990711 |
| MIR614    | 0.437578 | 0.425299 | -0.04106 | 0.395393 |
| KRT5      | 0.667355 | 0.603911 | -0.14412 | 0.044986 |
| MED7      | 0.124493 | 0.128089 | 0.041092 | 0.060237 |
| TMEM133   | 0.607498 | 0.623062 | 0.036497 | 0.68195  |
| MIR488    | 0.502823 | 0.50071  | -0.00608 | 0.966569 |
| CTSF      | 0.25333  | 0.263325 | 0.055824 | 0.107628 |
| KLRB1     | 0.427734 | 0.469628 | 0.134805 | 0.003973 |
| SLC17A2   | 0.676913 | 0.6978   | 0.043844 | 0.236865 |
| ZNF564    | 0.061203 | 0.061983 | 0.018263 | 0.351652 |
| GTF2H3    | 0.572509 | 0.578066 | 0.013936 | 0.505454 |
| BRD3      | 0.627287 | 0.622428 | -0.01122 | 0.489223 |
| SLC12A3   | 0.379002 | 0.358492 | -0.08026 | 0.042081 |
| CRYZL1    | 0.263415 | 0.261258 | -0.01186 | 0.634786 |
| RAPGEF5   | 0.450144 | 0.457248 | 0.022589 | 0.450601 |
| MIR514.1  | 0.474784 | 0.50033  | 0.075611 | 0.460446 |
| EREG      | 0.226946 | 0.23731  | 0.064423 | 0.226872 |
| GHRH      | 0.574858 | 0.557323 | -0.04469 | 0.168069 |
| SNORA25   | 0.81509  | 0.85079  | 0.061844 | 0.135554 |
| C1GALT1C  | 0.155434 | 0.170243 | 0.131288 | 0.225087 |

|          |          |          |          |          |
|----------|----------|----------|----------|----------|
| LCN10    | 0.422774 | 0.428066 | 0.017946 | 0.613369 |
| TMEM65   | 0.088294 | 0.090219 | 0.031106 | 0.44781  |
| MIR9.1   | 0.049373 | 0.046552 | -0.08489 | 0.440865 |
| CCDC144E | 0.444883 | 0.453752 | 0.028481 | 0.537212 |
| PPFIA2   | 0.217796 | 0.225434 | 0.049727 | 0.242455 |
| IFT81    | 0.115629 | 0.120116 | 0.054925 | 0.154831 |
| SLC23A1  | 0.629775 | 0.625758 | -0.00923 | 0.355279 |
| LOC10013 | 0.166982 | 0.161128 | -0.05148 | 0.427198 |
| CST9L    | 0.189327 | 0.18037  | -0.06992 | 0.416435 |
| C12orf59 | 0.203884 | 0.19662  | -0.05234 | 0.593887 |
| SOX18    | 0.105131 | 0.105785 | 0.008949 | 0.830379 |
| APOH     | 0.805588 | 0.779957 | -0.04665 | 0.005752 |
| UBE2A    | 0.227724 | 0.244278 | 0.101238 | 0.107119 |
| C11orf49 | 0.369797 | 0.374298 | 0.017452 | 0.363828 |
| OPRK1    | 0.175353 | 0.183165 | 0.062887 | 0.380043 |
| C6orf222 | 0.69639  | 0.6679   | -0.06026 | 0.000153 |
| CCDC8    | 0.658337 | 0.677622 | 0.041653 | 0.203612 |
| SNORA69  | 0.792281 | 0.743078 | -0.0925  | 0.315588 |
| CRAMP1L  | 0.617567 | 0.615712 | -0.00434 | 0.824934 |
| NCRNA00  | 0.703253 | 0.709242 | 0.012236 | 0.648119 |
| POT1     | 0.207797 | 0.213356 | 0.038089 | 0.194652 |
| JUNB     | 0.043779 | 0.04304  | -0.02458 | 0.322357 |
| C20orf43 | 0.218359 | 0.212309 | -0.04054 | 0.361376 |
| AAA1     | 0.656851 | 0.635734 | -0.04714 | 0.057431 |
| SYT1     | 0.421108 | 0.428128 | 0.023851 | 0.264713 |
| PACSIN2  | 0.700767 | 0.694831 | -0.01227 | 0.193849 |
| DPF3     | 0.379182 | 0.377741 | -0.00549 | 0.473275 |
| BHLHE41  | 0.165858 | 0.15725  | -0.07688 | 0.121523 |
| FAM90A8  | 0.526113 | 0.548105 | 0.05908  | 0.306694 |
| MGMT     | 0.649411 | 0.645614 | -0.00846 | 0.883374 |
| RAB23    | 0.082008 | 0.085609 | 0.06199  | 0.141765 |
| PAR.SN   | 0.610035 | 0.623045 | 0.030443 | 0.365063 |
| ZNF197   | 0.167405 | 0.167141 | -0.00228 | 0.925794 |
| BTF3L4   | 0.140802 | 0.148806 | 0.079761 | 0.397987 |
| SNORD1C  | 0.107494 | 0.109093 | 0.021309 | 0.692227 |
| PIK3C2A  | 0.659838 | 0.678599 | 0.040447 | 0.461854 |
| ZNF598   | 0.508795 | 0.500757 | -0.02297 | 0.228666 |
| CAMP     | 0.478882 | 0.46386  | -0.04598 | 0.076405 |
| DKK4     | 0.495397 | 0.533567 | 0.107086 | 0.042081 |
| LOC28423 | 0.271252 | 0.264674 | -0.03541 | 0.643108 |
| OR2F1    | 0.655356 | 0.692788 | 0.080134 | 0.204443 |
| C17orf68 | 0.235463 | 0.242925 | 0.045012 | 0.230471 |
| MMP20    | 0.62353  | 0.601222 | -0.05256 | 0.375007 |
| IAPP     | 0.725088 | 0.770055 | 0.086804 | 0.461856 |
| RIPK4    | 0.27895  | 0.312498 | 0.163841 | 0.116023 |
| UBE2F    | 0.321882 | 0.319085 | -0.01259 | 0.656514 |
| LEPREL1  | 0.318205 | 0.32999  | 0.052465 | 0.477598 |
| TSPAN8   | 0.399425 | 0.412924 | 0.047953 | 0.69051  |
| IAH1     | 0.249043 | 0.255019 | 0.034214 | 0.274816 |
| HAUS1    | 0.028848 | 0.027382 | -0.07523 | 0.471766 |
| CDKN3    | 0.133161 | 0.13214  | -0.01111 | 0.949872 |
| ZNF285A  | 0.134588 | 0.135791 | 0.012845 | 0.636448 |
| KRTAP6.2 | 0.441966 | 0.458402 | 0.052679 | 0.603594 |
| BTN3A2   | 0.344423 | 0.336101 | -0.03529 | 0.714691 |
| OR10A4   | 0.221076 | 0.231454 | 0.066186 | 0.881538 |
| CRISP1   | 0.299785 | 0.325579 | 0.119077 | 0.320106 |

|          |          |          |          |          |
|----------|----------|----------|----------|----------|
| PSMG4    | 0.300161 | 0.294707 | -0.02646 | 0.33857  |
| GOLGA6C  | 0.610181 | 0.598522 | -0.02783 | 0.582655 |
| ELSPBP1  | 0.101623 | 0.09732  | -0.06241 | 0.312235 |
| TRIL     | 0.139592 | 0.157907 | 0.17786  | 0.288341 |
| MFRP     | 0.4007   | 0.360406 | -0.1529  | 0.02236  |
| SPOCK2   | 0.449615 | 0.471063 | 0.06723  | 0.104607 |
| CHCHD2   | 0.099137 | 0.100405 | 0.018347 | 0.528034 |
| AQP12A   | 0.70191  | 0.677569 | -0.05092 | 0.358925 |
| NOMO2    | 0.14702  | 0.144164 | -0.0283  | 0.746201 |
| SLC4A7   | 0.44958  | 0.464908 | 0.048366 | 0.231378 |
| ELOF1    | 0.184567 | 0.179294 | -0.04182 | 0.440878 |
| CEACAM3  | 0.344841 | 0.332024 | -0.05464 | 0.585855 |
| PNPLA4   | 0.347102 | 0.322991 | -0.10387 | 0.267717 |
| SCN9A    | 0.307904 | 0.314019 | 0.028373 | 0.548016 |
| ALDH1A3  | 0.316382 | 0.295153 | -0.1002  | 0.245282 |
| CA14     | 0.360194 | 0.3562   | -0.01609 | 0.787084 |
| TM2D2    | 0.103094 | 0.104416 | 0.018381 | 0.34806  |
| FGF19    | 0.240962 | 0.209909 | -0.19904 | 0.047017 |
| DYM      | 0.338    | 0.339002 | 0.004271 | 0.762121 |
| SDCCAG1C | 0.334538 | 0.341516 | 0.029784 | 0.663258 |
| RPGR     | 0.14733  | 0.16279  | 0.14396  | 0.26571  |
| IFIT2    | 0.330625 | 0.348242 | 0.074894 | 0.196261 |
| DSTN     | 0.222742 | 0.225771 | 0.019489 | 0.490686 |
| THSD1    | 0.268829 | 0.271445 | 0.013972 | 0.503965 |
| OR51V1   | 0.295782 | 0.321761 | 0.121454 | 0.427199 |
| NAA10    | 0.277262 | 0.289777 | 0.063694 | 0.122649 |
| ETFB     | 0.048403 | 0.050825 | 0.070441 | 0.201137 |
| FGFR4    | 0.572223 | 0.562077 | -0.02581 | 0.040006 |
| SULT1A4  | 0.842867 | 0.833793 | -0.01562 | 0.610098 |
| RNASE11  | 0.360179 | 0.298934 | -0.26889 | 0.024055 |
| TAAR1    | 0.15763  | 0.186898 | 0.245709 | 0.045236 |
| OR13D1   | 0.647587 | 0.579059 | -0.16136 | 0.051584 |
| CLLU1    | 0.352598 | 0.354712 | 0.008625 | 0.563633 |
| ATAD2    | 0.093137 | 0.097619 | 0.067816 | 0.142398 |
| MGC2752  | 0.288009 | 0.293668 | 0.028071 | 0.447811 |
| ATXN1    | 0.494889 | 0.496097 | 0.003517 | 0.854056 |
| BIRC5    | 0.357434 | 0.371418 | 0.055366 | 0.349258 |
| DNAJC19  | 0.279636 | 0.272874 | -0.03532 | 0.14495  |
| SPRR3    | 0.358221 | 0.340919 | -0.07142 | 0.348061 |
| PLCL2    | 0.406166 | 0.412762 | 0.02324  | 0.226871 |
| PDCD5    | 0.145135 | 0.150376 | 0.051179 | 0.240583 |
| MUS81    | 0.198024 | 0.201382 | 0.024258 | 0.227768 |
| POU3F2   | 0.047978 | 0.049685 | 0.050421 | 0.04573  |
| CNTN1    | 0.180763 | 0.191377 | 0.082316 | 0.074115 |
| CAMK2A   | 0.402539 | 0.394347 | -0.02967 | 0.453401 |
| CASP8AP2 | 0.199445 | 0.197671 | -0.01289 | 0.961001 |
| CLEC1B   | 0.233831 | 0.227094 | -0.04218 | 0.502483 |
| ATF7IP2  | 0.543564 | 0.528354 | -0.04094 | 0.258775 |
| GDF10    | 0.392716 | 0.37999  | -0.04752 | 0.132538 |
| HSF1     | 0.460062 | 0.477339 | 0.053187 | 0.093191 |
| HAP1     | 0.128522 | 0.11903  | -0.11069 | 0.023909 |
| C3orf42  | 0.279449 | 0.267552 | -0.06276 | 0.08446  |
| DAZAP1   | 0.601315 | 0.59135  | -0.02411 | 0.076792 |
| LRRC61   | 0.293737 | 0.278483 | -0.07694 | 0.03759  |
| COQ10B   | 0.136293 | 0.135755 | -0.00571 | 0.697388 |
| FOXA1    | 0.051707 | 0.052531 | 0.022809 | 0.585847 |

|          |          |          |          |          |
|----------|----------|----------|----------|----------|
| CROCCL2  | 0.546195 | 0.54826  | 0.005442 | 1        |
| EZR      | 0.366563 | 0.356014 | -0.04213 | 0.055922 |
| GNRHR2   | 0.077837 | 0.078033 | 0.003628 | 0.778141 |
| GYLTL1B  | 0.347008 | 0.331445 | -0.0662  | 0.015256 |
| SNORD11f | 0.721759 | 0.711413 | -0.02083 | 0.471839 |
| NPY1R    | 0.202303 | 0.20755  | 0.03694  | 0.483392 |
| CCDC132  | 0.057684 | 0.055566 | -0.05395 | 0.440865 |
| C7orf28B | 0.165364 | 0.163413 | -0.01712 | 0.60359  |
| SRXN1    | 0.17644  | 0.175701 | -0.00605 | 0.87236  |
| IL12A    | 0.191242 | 0.187001 | -0.03236 | 0.83583  |
| CIRH1A   | 0.63093  | 0.6237   | -0.01663 | 0.461859 |
| GLYAT    | 0.331724 | 0.37547  | 0.178715 | 0.197067 |
| RPL28    | 0.153172 | 0.153339 | 0.00157  | 0.80145  |
| SNAPIN   | 0.211825 | 0.208691 | -0.02151 | 0.408467 |
| TUBGCP2  | 0.646514 | 0.640491 | -0.0135  | 0.281002 |
| DLGAP4   | 0.466136 | 0.467905 | 0.005465 | 0.466125 |
| LARP4    | 0.19847  | 0.191857 | -0.04889 | 0.114408 |
| TRIM43   | 0.566645 | 0.558797 | -0.02012 | 0.815883 |
| FAM49B   | 0.206028 | 0.210535 | 0.031219 | 0.27687  |
| ADCK1    | 0.378714 | 0.387006 | 0.03125  | 0.200318 |
| CCDC64   | 0.188379 | 0.185286 | -0.02388 | 0.274816 |
| GLB1L2   | 0.505058 | 0.503472 | -0.00454 | 0.973995 |
| LRIT1    | 0.696964 | 0.681254 | -0.03289 | 0.30013  |
| SEMA4G   | 0.748503 | 0.741028 | -0.01448 | 0.257791 |
| SIX2     | 0.310327 | 0.324275 | 0.063432 | 0.466124 |
| FBXW8    | 0.463674 | 0.449403 | -0.0451  | 0.047017 |
| PTHLH    | 0.239295 | 0.212769 | -0.1695  | 0.023336 |
| EIF5B    | 0.115319 | 0.116698 | 0.01714  | 0.68708  |
| FAM169B  | 0.614742 | 0.611271 | -0.00817 | 0.835829 |
| CTDP1    | 0.632836 | 0.627445 | -0.01234 | 0.626508 |
| BHLHA9   | 0.256998 | 0.297536 | 0.211305 | 0.072619 |
| FAM92B   | 0.616229 | 0.575925 | -0.09759 | 0.000961 |
| LUZP6    | 0.558659 | 0.579146 | 0.051961 | 0.068629 |
| PTPN4    | 0.315389 | 0.317735 | 0.010688 | 0.728638 |
| NINJ2    | 0.350469 | 0.344125 | -0.02635 | 0.231378 |
| PLAC2    | 0.130931 | 0.12802  | -0.03244 | 0.702563 |
| CGN      | 0.347983 | 0.344416 | -0.01486 | 0.714691 |
| WDR13    | 0.45933  | 0.474147 | 0.045803 | 0.048059 |
| LCN8     | 0.350617 | 0.328322 | -0.09479 | 0.182141 |
| SETD8    | 0.159921 | 0.157481 | -0.02218 | 0.329252 |
| GPR1     | 0.26175  | 0.267627 | 0.032038 | 0.33506  |
| TSPAN5   | 0.479222 | 0.481231 | 0.006036 | 0.634786 |
| C1orf43  | 0.053951 | 0.055146 | 0.031599 | 0.68708  |
| REEP1    | 0.239356 | 0.234204 | -0.03139 | 0.18832  |
| UBE2B    | 0.199061 | 0.20116  | 0.015129 | 0.180619 |
| DIRC2    | 0.159979 | 0.157702 | -0.02069 | 0.531084 |
| MAGED1   | 0.218856 | 0.232678 | 0.088349 | 0.07006  |
| ZHX2     | 0.396107 | 0.392646 | -0.01266 | 0.544917 |
| CHP2     | 0.372949 | 0.346235 | -0.10723 | 0.110198 |
| NECAB1   | 0.420588 | 0.418532 | -0.00707 | 0.498041 |
| LPAR1    | 0.409832 | 0.414048 | 0.014765 | 0.593887 |
| GPATCH8  | 0.438479 | 0.441063 | 0.008475 | 0.603594 |
| CCK      | 0.168722 | 0.167004 | -0.01477 | 0.251965 |
| SSX5     | 0.491883 | 0.474264 | -0.05262 | 0.505455 |
| DHRS4L2  | 0.394852 | 0.396047 | 0.004359 | 0.797852 |
| C16orf89 | 0.357988 | 0.344917 | -0.05366 | 0.403208 |

|          |          |          |          |          |
|----------|----------|----------|----------|----------|
| CD99L2   | 0.112992 | 0.120654 | 0.094648 | 0.163096 |
| ARHGAP11 | 0.137146 | 0.135396 | -0.01853 | 0.912856 |
| SAT2     | 0.053988 | 0.053588 | -0.01072 | 0.624859 |
| ZDHHC13  | 0.074736 | 0.075177 | 0.008494 | 0.779927 |
| NHSL2    | 0.307339 | 0.314954 | 0.035313 | 0.355284 |
| LOC10013 | 0.569204 | 0.567065 | -0.00543 | 0.844932 |
| ZNF80    | 0.540289 | 0.531676 | -0.02318 | 0.11548  |
| OR2J2    | 0.346477 | 0.354602 | 0.033443 | 0.676833 |
| TROAP    | 0.255748 | 0.252471 | -0.01861 | 0.460445 |
| INTS2    | 0.259221 | 0.256079 | -0.0176  | 0.576281 |
| ZNF385D  | 0.231872 | 0.238332 | 0.039643 | 0.051866 |
| SNHG9    | 0.047724 | 0.0462   | -0.04682 | 0.108638 |
| MTRF1    | 0.070299 | 0.055684 | -0.33625 | 0.790668 |
| TMEM42   | 0.145132 | 0.141263 | -0.03898 | 0.065506 |
| LOC33978 | 0.395653 | 0.39253  | -0.01144 | 0.557357 |
| FAM105B  | 0.218093 | 0.219465 | 0.009047 | 0.742678 |
| ISYNA1   | 0.348783 | 0.353701 | 0.0202   | 0.680242 |
| DOCK10   | 0.460513 | 0.452599 | -0.02501 | 0.316717 |
| SFRS18   | 0.235063 | 0.240611 | 0.033654 | 0.266712 |
| UGP2     | 0.152566 | 0.156313 | 0.034999 | 0.13556  |
| C5orf23  | 0.553409 | 0.557594 | 0.010871 | 0.778143 |
| SLC27A4  | 0.431572 | 0.4305   | -0.00359 | 0.697388 |
| MFSD10   | 0.400185 | 0.392967 | -0.02626 | 0.468978 |
| TSEN54   | 0.504957 | 0.493135 | -0.03418 | 0.227767 |
| PSMA4    | 0.239848 | 0.248263 | 0.049751 | 0.051586 |
| TFR2     | 0.515494 | 0.524178 | 0.0241   | 0.277896 |
| COQ6     | 0.156527 | 0.157187 | 0.006069 | 0.628163 |
| WNT2B    | 0.204935 | 0.198215 | -0.04809 | 0.022774 |
| ANGPT4   | 0.350338 | 0.342931 | -0.03083 | 0.466125 |
| HLA.DOB  | 0.224781 | 0.225258 | 0.003059 | 0.957291 |
| GSG1     | 0.464928 | 0.458165 | -0.02114 | 0.154829 |
| RASD2    | 0.383654 | 0.372607 | -0.04215 | 0.092287 |
| PRDX4    | 0.262749 | 0.273579 | 0.058275 | 0.246228 |
| PROC     | 0.539636 | 0.526306 | -0.03609 | 0.044737 |
| KIAA0090 | 0.216121 | 0.216682 | 0.003739 | 0.892573 |
| BTF3L1   | 0.358544 | 0.353429 | -0.02073 | 0.179107 |
| BTN2A1   | 0.255242 | 0.252545 | -0.01532 | 0.975852 |
| ZNF175   | 0.228273 | 0.215819 | -0.08094 | 0.064827 |
| KCNK4    | 0.257432 | 0.249592 | -0.04462 | 0.460446 |
| TULP3    | 0.217908 | 0.219226 | 0.008698 | 0.9369   |
| UGT1A10  | 0.557148 | 0.555067 | -0.0054  | 0.87236  |
| CHD4     | 0.191798 | 0.187594 | -0.03198 | 0.436748 |
| SNORA11F | 0.835063 | 0.838889 | 0.006594 | 0.762118 |
| XCL2     | 0.422189 | 0.43464  | 0.041929 | 0.156186 |
| PIM1     | 0.061842 | 0.065523 | 0.083409 | 0.110196 |
| MUC5B    | 0.545063 | 0.561252 | 0.042226 | 0.499519 |
| FSD1L    | 0.394564 | 0.401744 | 0.026018 | 0.215446 |
| F13A1    | 0.314952 | 0.28948  | -0.12167 | 0.354073 |
| LOC15838 | 0.398095 | 0.418016 | 0.070445 | 0.452001 |
| HSPA12B  | 0.363458 | 0.361144 | -0.00922 | 0.949872 |
| HSF4     | 0.226078 | 0.23908  | 0.08067  | 0.302309 |
| TAF1     | 0.156808 | 0.161401 | 0.041649 | 0.382575 |
| MS4A4A   | 0.355931 | 0.37178  | 0.062851 | 0.555799 |
| EIF4A2   | 0.083154 | 0.081992 | -0.0203  | 0.598729 |
| LHX8     | 0.142889 | 0.150311 | 0.073058 | 0.285181 |
| KHDC1L   | 0.726141 | 0.718603 | -0.01505 | 0.737399 |

|          |          |          |          |          |
|----------|----------|----------|----------|----------|
| FAM3D    | 0.595869 | 0.596281 | 0.000998 | 0.733893 |
| CLVS1    | 0.322696 | 0.319451 | -0.01458 | 0.381306 |
| QTRTD1   | 0.354993 | 0.358293 | 0.013351 | 0.49362  |
| SNORA76  | 0.039473 | 0.038788 | -0.02523 | 0.651459 |
| GOLGA8F  | 0.447351 | 0.433951 | -0.04387 | 0.242454 |
| CYP2C8   | 0.19309  | 0.185822 | -0.05535 | 0.238722 |
| NTN5     | 0.803771 | 0.799014 | -0.00856 | 0.517432 |
| KCNK1    | 0.217074 | 0.20897  | -0.05489 | 0.440879 |
| C6orf94  | 0.422413 | 0.438666 | 0.054469 | 0.079949 |
| FERMT2   | 0.301173 | 0.297816 | -0.01617 | 0.509928 |
| GEN1     | 0.100442 | 0.102422 | 0.02816  | 0.267715 |
| MATN1    | 0.356381 | 0.347121 | -0.03799 | 0.314472 |
| SLC22A16 | 0.227031 | 0.244425 | 0.106498 | 0.061845 |
| CNTNAP3  | 0.492576 | 0.500067 | 0.021774 | 0.492154 |
| AEN      | 0.295657 | 0.286109 | -0.04736 | 0.18214  |
| YWHAZ    | 0.059461 | 0.06261  | 0.074439 | 0.066878 |
| BCAS1    | 0.567358 | 0.553264 | -0.03629 | 0.256816 |
| ANKRD1   | 0.709405 | 0.712959 | 0.00721  | 0.427196 |
| AKAP14   | 0.396048 | 0.390689 | -0.01965 | 0.345674 |
| CXorf65  | 0.428598 | 0.394834 | -0.11838 | 0.040688 |
| MCHR2    | 0.172169 | 0.174912 | 0.022803 | 0.508436 |
| C7orf23  | 0.134948 | 0.136107 | 0.012337 | 0.473272 |
| MAOB     | 0.43032  | 0.394249 | -0.1263  | 0.193055 |
| BMS1P4   | 0.265791 | 0.267809 | 0.010915 | 0.787085 |
| LOC57255 | 0.158287 | 0.161928 | 0.032807 | 0.443643 |
| BBOX1    | 0.405864 | 0.42808  | 0.076885 | 0.218917 |
| DRAP1    | 0.222191 | 0.214991 | -0.04752 | 0.558927 |
| PLA2G4C  | 0.166643 | 0.176953 | 0.086613 | 0.20032  |
| SMARCD2  | 0.191304 | 0.189362 | -0.01472 | 0.76745  |
| TNFRSF4  | 0.438056 | 0.456306 | 0.058884 | 0.312237 |
| EFCAB4A  | 0.236371 | 0.23211  | -0.02625 | 0.350459 |
| SLC22A13 | 0.626204 | 0.632032 | 0.013365 | 0.427199 |
| KIAA0427 | 0.42237  | 0.417161 | -0.0179  | 0.090943 |
| PCDHB3   | 0.445744 | 0.482287 | 0.113676 | 0.184439 |
| SNORD76  | 0.047782 | 0.046641 | -0.03487 | 0.439485 |
| IGSF3    | 0.398349 | 0.404792 | 0.023146 | 0.127227 |
| LOC40080 | 0.610657 | 0.714621 | 0.226816 | 0.004277 |
| TMEM39A  | 0.17316  | 0.174119 | 0.007971 | 0.740918 |
| VASH2    | 0.299005 | 0.295623 | -0.01641 | 0.262724 |
| SCARNA16 | 0.034157 | 0.034672 | 0.021598 | 0.080707 |
| OR5K3    | 0.316051 | 0.382503 | 0.275313 | 0.000641 |
| MAPK8    | 0.667987 | 0.691802 | 0.050539 | 0.048322 |
| SRP19    | 0.164383 | 0.1695   | 0.044218 | 0.20947  |
| C6orf126 | 0.370182 | 0.360055 | -0.04001 | 0.256818 |
| KPNA1    | 0.258081 | 0.27278  | 0.079913 | 0.013319 |
| MIR181B1 | 0.782901 | 0.863705 | 0.141709 | 0.009681 |
| GPR12    | 0.276592 | 0.264038 | -0.06701 | 0.098293 |
| ZNHIT6   | 0.222901 | 0.225565 | 0.01714  | 0.668336 |
| SR140    | 0.275809 | 0.280868 | 0.026221 | 0.70429  |
| CYP1A2   | 0.436297 | 0.413943 | -0.07588 | 0.324658 |
| EIF1     | 0.105063 | 0.106209 | 0.015647 | 0.656513 |
| DAB2     | 0.249709 | 0.257702 | 0.045456 | 0.619926 |
| PGK1     | 0.169653 | 0.189272 | 0.157873 | 0.115482 |
| BUD13    | 0.147472 | 0.148185 | 0.00696  | 0.509928 |
| CAPN2    | 0.409916 | 0.404425 | -0.01946 | 0.315593 |
| TACR3    | 0.133406 | 0.144737 | 0.117608 | 0.026487 |

|           |          |          |          |          |
|-----------|----------|----------|----------|----------|
| LRDD      | 0.613082 | 0.60655  | -0.01545 | 0.338573 |
| C19orf51  | 0.162573 | 0.157792 | -0.04307 | 0.287286 |
| GNAT1     | 0.324904 | 0.30906  | -0.07213 | 0.041148 |
| ZBTB12    | 0.357215 | 0.351205 | -0.02448 | 0.386392 |
| CCDC141   | 0.725819 | 0.734448 | 0.017051 | 0.283082 |
| KILLIN    | 0.159588 | 0.183028 | 0.197716 | 0.174631 |
| MYBBP1A   | 0.328291 | 0.322468 | -0.02582 | 0.332729 |
| LOC28555  | 0.180096 | 0.18159  | 0.011923 | 0.316718 |
| TSSK6     | 0.736974 | 0.753581 | 0.032148 | 0.518942 |
| RNF44     | 0.426948 | 0.413954 | -0.04459 | 0.120408 |
| C16orf68  | 0.433646 | 0.424784 | -0.02979 | 0.188318 |
| SRL       | 0.586802 | 0.577467 | -0.02313 | 0.243392 |
| PABPN1    | 0.367073 | 0.367269 | 0.000771 | 0.942457 |
| BLOC1S1   | 0.337394 | 0.333017 | -0.01884 | 0.621567 |
| CDC10L    | 0.134101 | 0.135163 | 0.011371 | 0.927644 |
| TCF4      | 0.229344 | 0.224679 | -0.02965 | 0.445029 |
| AKR1B10   | 0.554482 | 0.560191 | 0.014777 | 0.534144 |
| TESK1     | 0.259552 | 0.25175  | -0.04404 | 0.193055 |
| FRK       | 0.495747 | 0.505777 | 0.028896 | 0.370015 |
| TTLL10    | 0.359307 | 0.386685 | 0.10594  | 0.217177 |
| HCRT2     | 0.355994 | 0.401925 | 0.175072 | 0.022088 |
| HOXA4     | 0.20547  | 0.215415 | 0.068196 | 0.46755  |
| PARP9     | 0.157427 | 0.151914 | -0.05143 | 0.287286 |
| FGF5      | 0.129285 | 0.155192 | 0.263506 | 0.102629 |
| FAM149A   | 0.346141 | 0.35342  | 0.030025 | 0.235949 |
| GPAA1     | 0.121685 | 0.12408  | 0.028117 | 0.157546 |
| DEFB115   | 0.178558 | 0.17195  | -0.0544  | 0.203613 |
| PKDCC     | 0.328387 | 0.329163 | 0.003404 | 0.585853 |
| ERICH1    | 0.629564 | 0.623862 | -0.01313 | 0.241517 |
| ERAL1     | 0.099099 | 0.098694 | -0.00591 | 0.977709 |
| IKZF2     | 0.339727 | 0.326676 | -0.05652 | 0.16807  |
| TTYH2     | 0.42255  | 0.422334 | -0.00074 | 0.712954 |
| C2orf77   | 0.075411 | 0.073467 | -0.03769 | 0.548008 |
| SPAG7     | 0.109106 | 0.1141   | 0.064565 | 0.021552 |
| USP27X    | 0.21455  | 0.235798 | 0.136242 | 0.270745 |
| ATRNL1    | 0.245877 | 0.25028  | 0.025608 | 0.305594 |
| ANGPT2    | 0.329978 | 0.321699 | -0.03666 | 0.361376 |
| MICB      | 0.180454 | 0.176905 | -0.02865 | 0.5955   |
| HOPX      | 0.246479 | 0.261473 | 0.085193 | 0.416435 |
| PDE9A     | 0.509575 | 0.521674 | 0.033855 | 0.266711 |
| C14orf167 | 0.233007 | 0.229701 | -0.02062 | 0.566783 |
| CD40      | 0.413698 | 0.358044 | -0.20844 | 0.029301 |
| UGT2B7    | 0.117155 | 0.13989  | 0.255871 | 0.136173 |
| VWA2      | 0.480086 | 0.478755 | -0.004   | 0.523479 |
| RAB11FIP5 | 0.408514 | 0.403741 | -0.01696 | 0.351659 |
| MIR604    | 0.240182 | 0.235289 | -0.02969 | 0.746202 |
| CXADR     | 0.16189  | 0.168145 | 0.054694 | 0.109678 |
| IL2RG     | 0.549624 | 0.557967 | 0.021735 | 0.753264 |
| C7orf47   | 0.11358  | 0.117015 | 0.042987 | 0.746199 |
| SSX7      | 0.457446 | 0.434537 | -0.07412 | 0.304496 |
| NACAP1    | 0.542594 | 0.540238 | -0.00628 | 0.826749 |
| VTRNA1.2  | 0.364915 | 0.387805 | 0.087773 | 0.417771 |
| C3orf64   | 0.194621 | 0.200176 | 0.0406   | 0.512926 |
| PCDHA7    | 0.491593 | 0.510581 | 0.054675 | 0.058046 |
| MRPS18C   | 0.131699 | 0.140726 | 0.095645 | 0.274818 |
| MAST4     | 0.415896 | 0.408462 | -0.02602 | 0.193853 |

|          |          |          |          |          |
|----------|----------|----------|----------|----------|
| FLJ36000 | 0.184108 | 0.176065 | -0.06444 | 0.285181 |
| LRRC14   | 0.366071 | 0.371391 | 0.020819 | 0.940605 |
| LOXL1    | 0.445049 | 0.419653 | -0.08477 | 0.016896 |
| PVRL2    | 0.14018  | 0.142531 | 0.023995 | 0.879701 |
| KDM5A    | 0.183148 | 0.187166 | 0.031311 | 0.186759 |
| TRIM29   | 0.748294 | 0.738464 | -0.01908 | 0.107623 |
| MIR16.1  | 0.50551  | 0.543558 | 0.104693 | 0.293662 |
| C8orf85  | 0.316202 | 0.291828 | -0.11573 | 0.089616 |
| MIR612   | 0.7813   | 0.786473 | 0.00952  | 0.584252 |
| ACAA2    | 0.157633 | 0.150669 | -0.06519 | 0.346865 |
| FBXO38   | 0.141529 | 0.14303  | 0.015226 | 0.313353 |
| FBXO2    | 0.307218 | 0.293597 | -0.06543 | 0.247177 |
| NOL11    | 0.16965  | 0.165951 | -0.0318  | 0.268724 |
| CFHR5    | 0.217554 | 0.269801 | 0.310527 | 0.00093  |
| AOX1     | 0.245535 | 0.2529   | 0.042638 | 0.104109 |
| CCDC158  | 0.455875 | 0.473749 | 0.055484 | 0.221546 |
| RAB9B    | 0.364388 | 0.374502 | 0.039499 | 0.099723 |
| SRP14    | 0.120227 | 0.123976 | 0.044307 | 0.119297 |
| FXYD5    | 0.127844 | 0.124295 | -0.04062 | 0.158924 |
| FBXO3    | 0.090457 | 0.094793 | 0.06756  | 0.032746 |
| GPBP1L1  | 0.1884   | 0.180205 | -0.06416 | 0.246227 |
| MIR199A1 | 0.622345 | 0.563941 | -0.14217 | 0.097349 |
| ZAK      | 0.325304 | 0.339734 | 0.062618 | 0.070783 |
| CLEC4D   | 0.153553 | 0.154226 | 0.006303 | 0.850404 |
| DEFB127  | 0.372373 | 0.389094 | 0.063369 | 0.249086 |
| EEF2K    | 0.31506  | 0.312194 | -0.01319 | 0.835829 |
| STRN3    | 0.261397 | 0.257685 | -0.02064 | 0.33975  |
| GPD1     | 0.46761  | 0.468603 | 0.00306  | 0.670032 |
| EIF2S1   | 0.124449 | 0.126165 | 0.019758 | 0.563633 |
| ZNF397   | 0.117887 | 0.116528 | -0.01673 | 0.621566 |
| OR2M2    | 0.156726 | 0.150031 | -0.06298 | 0.763897 |
| METTL7A  | 0.289666 | 0.264047 | -0.1336  | 0.031994 |
| SNORD116 | 0.494712 | 0.494578 | -0.00039 | 0.946164 |
| EIF2C1   | 0.271538 | 0.27021  | -0.00708 | 0.73916  |
| DLK2     | 0.162719 | 0.165556 | 0.024942 | 0.520452 |
| RBMX2    | 0.269497 | 0.272309 | 0.014974 | 0.929495 |
| TMEM8C   | 0.259492 | 0.25482  | -0.02621 | 0.501001 |
| DEXI     | 0.289859 | 0.285412 | -0.02231 | 0.540287 |
| DNAJC27  | 0.273213 | 0.281309 | 0.042132 | 0.07188  |
| CROT     | 0.172445 | 0.1836   | 0.090423 | 0.017771 |
| WDFY3    | 0.490111 | 0.500257 | 0.029562 | 0.333891 |
| NGFR     | 0.382089 | 0.360591 | -0.08354 | 0.013318 |
| YPEL5    | 0.271934 | 0.273548 | 0.008536 | 0.565207 |
| RALB     | 0.377963 | 0.369098 | -0.03424 | 0.07006  |
| TRMT12   | 0.135313 | 0.137055 | 0.018447 | 0.187538 |
| CDGAP    | 0.365215 | 0.373056 | 0.030646 | 0.113343 |
| ADPRHL2  | 0.245315 | 0.245449 | 0.000786 | 0.942458 |
| ELMO2    | 0.167808 | 0.166805 | -0.00865 | 0.693946 |
| PLCD4    | 0.416247 | 0.41948  | 0.011163 | 0.506944 |
| C17orf60 | 0.803437 | 0.804734 | 0.002327 | 0.658194 |
| NBEAL1   | 0.132072 | 0.134899 | 0.030556 | 0.264713 |
| LOC64730 | 0.190544 | 0.195793 | 0.0392   | 0.814076 |
| NMNAT2   | 0.311328 | 0.314498 | 0.014618 | 0.584252 |
| IRGM     | 0.203216 | 0.200145 | -0.02197 | 0.388952 |
| DDT      | 0.874764 | 0.884126 | 0.015358 | 0.110186 |
| NAT8L    | 0.343984 | 0.334172 | -0.04175 | 0.09502  |

|           |          |          |          |          |
|-----------|----------|----------|----------|----------|
| DNAH12    | 0.390148 | 0.389921 | -0.00084 | 0.71469  |
| MAP3K7IP  | 0.18258  | 0.198645 | 0.121661 | 0.104608 |
| OR51B2    | 0.262025 | 0.274306 | 0.06608  | 0.799651 |
| FAM92A3   | 0.32676  | 0.341794 | 0.064896 | 0.803251 |
| RNF112    | 0.270293 | 0.262407 | -0.04272 | 0.206944 |
| ZC3H3     | 0.520323 | 0.520532 | 0.000578 | 0.9369   |
| CASP12    | 0.411193 | 0.422497 | 0.039125 | 0.111762 |
| PLAC9     | 0.254375 | 0.252787 | -0.00904 | 0.938752 |
| RXFP1     | 0.685618 | 0.734332 | 0.099028 | 0.109162 |
| NOX3      | 0.573024 | 0.589213 | 0.040194 | 0.758573 |
| STRA6     | 0.460531 | 0.435153 | -0.08177 | 0.09688  |
| CTDSPL    | 0.410277 | 0.412164 | 0.00662  | 0.56836  |
| BRMS1     | 0.214275 | 0.212163 | -0.01428 | 0.653151 |
| AARS      | 0.282001 | 0.291741 | 0.048989 | 0.186761 |
| THOC5     | 0.200452 | 0.205934 | 0.038928 | 0.027127 |
| RASL12    | 0.358023 | 0.344411 | -0.05592 | 0.136783 |
| SDHD      | 0.040312 | 0.041053 | 0.026267 | 0.584246 |
| DIP2B     | 0.336677 | 0.337389 | 0.003048 | 0.712954 |
| SYNE2     | 0.531851 | 0.529456 | -0.00651 | 0.896256 |
| ECHDC2    | 0.335835 | 0.33198  | -0.01665 | 0.474712 |
| RAB11FIP4 | 0.37901  | 0.387922 | 0.033531 | 0.141768 |
| FAM109B   | 0.360427 | 0.343802 | -0.06813 | 0.242455 |
| IGF2AS    | 0.172864 | 0.148395 | -0.22019 | 0.003581 |
| ZNF385B   | 0.335662 | 0.344514 | 0.037552 | 0.270743 |
| ANKRD34   | 0.047283 | 0.046522 | -0.02341 | 0.611723 |
| FAM66E    | 0.376316 | 0.366835 | -0.03681 | 0.207784 |
| FAM119B   | 0.292959 | 0.295028 | 0.010156 | 0.628162 |
| DPEP2     | 0.348416 | 0.339158 | -0.03886 | 0.243394 |
| KCP       | 0.39788  | 0.406741 | 0.031774 | 0.348061 |
| PNMA2     | 0.132436 | 0.13391  | 0.015965 | 0.680241 |
| PNLIP     | 0.774495 | 0.788185 | 0.025278 | 0.456208 |
| DNM1      | 0.437941 | 0.448853 | 0.035507 | 0.069343 |
| HFE2      | 0.493958 | 0.44766  | -0.14198 | 0.029475 |
| HAPLN3    | 0.412783 | 0.383553 | -0.10596 | 0.024201 |
| C11orf58  | 0.113767 | 0.112563 | -0.01535 | 0.573108 |
| HMSD      | 0.409449 | 0.35247  | -0.21618 | 0.069343 |
| REPS2     | 0.234476 | 0.244889 | 0.062684 | 0.287286 |
| EDNRA     | 0.245063 | 0.271756 | 0.149161 | 0.064155 |
| KLHL33    | 0.512759 | 0.496469 | -0.04658 | 0.293662 |
| SFXN2     | 0.229926 | 0.226434 | -0.02208 | 0.569941 |
| RRAD      | 0.473887 | 0.444222 | -0.09326 | 0.104608 |
| MIR1470   | 0.268824 | 0.262362 | -0.03511 | 0.416433 |
| ALDH1A1   | 0.276085 | 0.286054 | 0.051174 | 0.629817 |
| SYNPR     | 0.359623 | 0.353117 | -0.02634 | 0.328103 |
| TBC1D3F   | 0.671096 | 0.673998 | 0.006227 | 0.961001 |
| ADRA2B    | 0.547177 | 0.530577 | -0.04444 | 0.3374   |
| UBXN6     | 0.346798 | 0.343703 | -0.01294 | 0.427198 |
| SIAE      | 0.212616 | 0.206657 | -0.04101 | 0.517435 |
| KLF10     | 0.074476 | 0.074878 | 0.007763 | 0.634785 |
| COG1      | 0.178366 | 0.178813 | 0.003613 | 0.719909 |
| ACTL8     | 0.515115 | 0.504505 | -0.03003 | 0.366295 |
| GALNT8    | 0.198735 | 0.203623 | 0.035054 | 0.592276 |
| LOXL4     | 0.405549 | 0.389158 | -0.05952 | 0.048323 |
| HIST1H2BI | 0.054928 | 0.056673 | 0.04514  | 0.124916 |
| ZBTB5     | 0.236477 | 0.229798 | -0.04133 | 0.252931 |
| TADA2A    | 0.180812 | 0.18032  | -0.00393 | 0.712952 |

|          |          |          |          |          |
|----------|----------|----------|----------|----------|
| RPAP1    | 0.2218   | 0.220544 | -0.00819 | 0.587458 |
| PPP1R3E  | 0.085717 | 0.086493 | 0.013009 | 0.523476 |
| HOTAIR   | 0.119634 | 0.102057 | -0.22925 | 0.161696 |
| TRIM6    | 0.130513 | 0.147922 | 0.180646 | 0.04208  |
| ZNF202   | 0.388581 | 0.382037 | -0.0245  | 0.355283 |
| CCDC88A  | 0.286605 | 0.290159 | 0.017782 | 0.566781 |
| PRDM4    | 0.21011  | 0.211428 | 0.00902  | 0.563635 |
| CDK5R1   | 0.19977  | 0.198644 | -0.00815 | 0.863199 |
| HADHB    | 0.099893 | 0.100463 | 0.008208 | 0.634785 |
| ZNF879   | 0.11565  | 0.119046 | 0.041751 | 0.350458 |
| COX7A2   | 0.131598 | 0.135002 | 0.036837 | 0.420451 |
| MAGEB16  | 0.460897 | 0.506206 | 0.135281 | 0.114946 |
| SLC7A13  | 0.444303 | 0.453993 | 0.031126 | 0.711218 |
| OR5T1    | 0.272363 | 0.29875  | 0.133405 | 0.546467 |
| GLYATL1  | 0.147845 | 0.160029 | 0.114252 | 0.077182 |
| MYL12B   | 0.075188 | 0.079076 | 0.072744 | 0.07796  |
| PCLO     | 0.326918 | 0.327186 | 0.001183 | 0.739159 |
| SPATA20  | 0.285383 | 0.277902 | -0.03833 | 0.06449  |
| C15orf2  | 0.454514 | 0.479469 | 0.077115 | 0.135562 |
| C13orf34 | 0.284461 | 0.287043 | 0.013036 | 0.456212 |
| GOSR2    | 0.17985  | 0.181692 | 0.014696 | 0.429912 |
| KCND3    | 0.38553  | 0.37099  | -0.05546 | 0.082797 |
| CACNA2D  | 0.495185 | 0.496763 | 0.00459  | 0.817691 |
| FAM92A1  | 0.145217 | 0.144283 | -0.00931 | 0.964713 |
| TMCO2    | 0.291953 | 0.311217 | 0.092186 | 0.390234 |
| SPTLC1   | 0.027388 | 0.026308 | -0.05807 | 0.338497 |
| ACMSD    | 0.430545 | 0.42931  | -0.00415 | 0.763896 |
| JAKMIP3  | 0.600193 | 0.590028 | -0.02464 | 0.094557 |
| CLUL1    | 0.192166 | 0.188693 | -0.02631 | 0.998142 |
| C5orf49  | 0.290381 | 0.278506 | -0.06024 | 0.160304 |
| GPR111   | 0.201372 | 0.215417 | 0.097265 | 0.278933 |
| UBE2J2   | 0.552492 | 0.547456 | -0.01321 | 0.340928 |
| USMG5    | 0.034162 | 0.034429 | 0.011216 | 0.676807 |
| ZNF251   | 0.323375 | 0.322845 | -0.00236 | 0.685368 |
| ACTN4    | 0.376796 | 0.372831 | -0.01526 | 0.511426 |
| RABEP1   | 0.37124  | 0.366698 | -0.01776 | 0.150818 |
| ARHGEF9  | 0.242476 | 0.249223 | 0.039592 | 0.367533 |
| FGGY     | 0.422663 | 0.422726 | 0.000214 | 0.996284 |
| DCTD     | 0.347404 | 0.345559 | -0.00768 | 0.994427 |
| CPLX1    | 0.442275 | 0.453395 | 0.035825 | 0.438122 |
| FOXN4    | 0.373604 | 0.355032 | -0.07356 | 0.012312 |
| PXDN     | 0.609308 | 0.606813 | -0.00592 | 0.281002 |
| GBX2     | 0.065735 | 0.071973 | 0.130788 | 0.690509 |
| LOC15476 | 0.142645 | 0.154779 | 0.117775 | 0.049123 |
| GALE     | 0.22634  | 0.227668 | 0.00844  | 0.558925 |
| PFN3     | 0.499981 | 0.51505  | 0.042837 | 0.24813  |
| PSMD8    | 0.114535 | 0.116426 | 0.023617 | 0.370011 |
| UPK2     | 0.429357 | 0.40388  | -0.08825 | 0.201962 |
| OR2K2    | 0.858381 | 0.860375 | 0.003348 | 0.923943 |
| LYPLAL1  | 0.140395 | 0.146548 | 0.061887 | 0.114945 |
| GEMIN5   | 0.197126 | 0.204957 | 0.056198 | 0.006047 |
| CN5H6.4  | 0.045151 | 0.042777 | -0.07792 | 0.826745 |
| C1orf161 | 0.567477 | 0.579602 | 0.030499 | 0.224195 |
| C12orf74 | 0.694415 | 0.701268 | 0.014168 | 0.920246 |
| TNS4     | 0.538772 | 0.526424 | -0.03345 | 0.007674 |
| GFOD1    | 0.478757 | 0.4741   | -0.0141  | 0.534143 |

|          |          |          |           |          |
|----------|----------|----------|-----------|----------|
| CNR1     | 0.449602 | 0.453493 | 0.012431  | 0.805052 |
| KLHDC1   | 0.049638 | 0.055269 | 0.155028  | 0.004152 |
| FCGR3B   | 0.285245 | 0.269249 | -0.08326  | 0.242455 |
| ZNF767   | 0.345068 | 0.339759 | -0.02237  | 0.498042 |
| RBM7     | 0.080506 | 0.080613 | 0.001921  | 0.54337  |
| SSBP4    | 0.277446 | 0.268635 | -0.04656  | 0.0353   |
| IPO8     | 0.132257 | 0.127823 | -0.04919  | 0.549568 |
| SNAR.C4  | 0.17739  | 0.174545 | -0.02332  | 0.221546 |
| IL4      | 0.732319 | 0.703047 | -0.05885  | 0.101165 |
| DYRK2    | 0.483809 | 0.483803 | -2.00E-05 | 0.616642 |
| ZNF518A  | 0.444131 | 0.457892 | 0.044021  | 0.294732 |
| SFXN3    | 0.375397 | 0.378598 | 0.01225   | 0.711218 |
| OR4D11   | 0.142506 | 0.136915 | -0.05775  | 0.315594 |
| CASKIN1  | 0.582056 | 0.574686 | -0.01838  | 0.195454 |
| MIR764   | 0.74198  | 0.778099 | 0.068573  | 0.297958 |
| FLJ35776 | 0.09197  | 0.082842 | -0.1508   | 0.231375 |
| HTT      | 0.482069 | 0.4798   | -0.00681  | 0.712954 |
| CD83     | 0.310234 | 0.302887 | -0.03457  | 0.21631  |
| MIR527   | 0.127266 | 0.139315 | 0.130496  | 0.285182 |
| DNASE1   | 0.474403 | 0.471016 | -0.01034  | 0.541828 |
| B4GALT4  | 0.214665 | 0.212785 | -0.01269  | 0.852229 |
| OR51D1   | 0.332222 | 0.334775 | 0.011041  | 0.949872 |
| PLEKHA8  | 0.167433 | 0.168982 | 0.013292  | 0.428554 |
| PQLC3    | 0.299652 | 0.289076 | -0.05184  | 0.057433 |
| RANBP9   | 0.153647 | 0.155807 | 0.020141  | 0.235949 |
| HIST2H2A | 0.083629 | 0.078464 | -0.09197  | 0.077181 |
| LCE1E    | 0.266591 | 0.246511 | -0.11297  | 0.316718 |
| C14orf72 | 0.159158 | 0.154917 | -0.03896  | 0.590668 |
| PAMR1    | 0.389161 | 0.350866 | -0.14945  | 0.149501 |
| POTEH    | 0.193505 | 0.186015 | -0.05695  | 0.643108 |
| SEC14L1  | 0.434449 | 0.42931  | -0.01717  | 0.344482 |
| SNORD75  | 0.236427 | 0.227567 | -0.05511  | 0.356498 |
| ZDHHC20  | 0.393752 | 0.398109 | 0.015879  | 0.36506  |
| BAT2     | 0.587289 | 0.58689  | -0.00098  | 0.892573 |
| FHOD1    | 0.360384 | 0.366598 | 0.024662  | 0.183669 |
| C8orf58  | 0.216294 | 0.211881 | -0.02974  | 0.158922 |
| GLP1R    | 0.442561 | 0.396611 | -0.15815  | 0.014679 |
| NCK1     | 0.132432 | 0.138363 | 0.063213  | 0.027127 |
| MIR642   | 0.586823 | 0.55873  | -0.07078  | 0.375007 |
| SPOCD1   | 0.509489 | 0.482609 | -0.0782   | 0.130158 |
| TMPRSS11 | 0.301181 | 0.335267 | 0.154677  | 0.10865  |
| PPIAL4G  | 0.703868 | 0.756617 | 0.104259  | 0.04449  |
| WASH2P   | 0.372036 | 0.366224 | -0.02272  | 0.23503  |
| SETMAR   | 0.2641   | 0.272323 | 0.044233  | 0.071147 |
| TMEM189  | 0.02024  | 0.021916 | 0.114776  | 0.074033 |
| RBKS     | 0.417654 | 0.400934 | -0.05894  | 0.134346 |
| PPL      | 0.363819 | 0.360382 | -0.0137   | 0.589059 |
| NUDT4    | 0.322795 | 0.330478 | 0.033937  | 0.400593 |
| TAF11    | 0.103677 | 0.104154 | 0.006633  | 0.633126 |
| C3orf35  | 0.122278 | 0.122951 | 0.007919  | 0.573106 |
| CD63     | 0.125544 | 0.133733 | 0.091159  | 0.036953 |
| TTY15    | 0.105197 | 0.109598 | 0.059119  | 0.548015 |
| RFX7     | 0.231579 | 0.234876 | 0.020393  | 0.565209 |
| ASPHD2   | 0.525839 | 0.522372 | -0.00954  | 0.505452 |
| NCR2     | 0.498126 | 0.495667 | -0.00714  | 0.297963 |
| HIPK1    | 0.305381 | 0.30786  | 0.011668  | 0.563634 |

|           |          |          |          |          |
|-----------|----------|----------|----------|----------|
| CCL18     | 0.226435 | 0.209497 | -0.11217 | 0.32124  |
| MMP16     | 0.30545  | 0.314072 | 0.04016  | 0.040687 |
| CHL1      | 0.306449 | 0.351528 | 0.197994 | 0.004122 |
| C4B       | 0.654421 | 0.657899 | 0.007647 | 0.692227 |
| GH1       | 0.444333 | 0.414659 | -0.09972 | 0.016789 |
| CYP2C18   | 0.153711 | 0.168848 | 0.135503 | 0.019889 |
| RNF43     | 0.276726 | 0.254941 | -0.11829 | 0.065506 |
| ERBB2IP   | 0.278415 | 0.288116 | 0.049415 | 0.268723 |
| HSDL2     | 0.043806 | 0.043427 | -0.01255 | 0.810461 |
| OR2T5     | 0.57925  | 0.6421   | 0.148612 | 0.069701 |
| C1QTNF5   | 0.597082 | 0.576795 | -0.04987 | 0.038237 |
| MIR770    | 0.64613  | 0.646708 | 0.001291 | 0.868693 |
| RPS15A    | 0.268032 | 0.27376  | 0.030507 | 0.66326  |
| RIC3      | 0.125614 | 0.127758 | 0.024422 | 0.304494 |
| KDM4A     | 0.241024 | 0.242438 | 0.00844  | 0.670032 |
| TMEM175   | 0.537048 | 0.532612 | -0.01197 | 0.431272 |
| SEN1      | 0.102599 | 0.106555 | 0.054572 | 0.061844 |
| RABGEF1   | 0.109831 | 0.112003 | 0.028254 | 0.246227 |
| ZBTB6     | 0.047855 | 0.050762 | 0.085088 | 0.114399 |
| PCDHB18   | 0.430105 | 0.440217 | 0.033524 | 0.449206 |
| BEND3     | 0.41517  | 0.411502 | -0.0128  | 0.554236 |
| NSA2      | 0.102666 | 0.106396 | 0.051498 | 0.07757  |
| CHRND     | 0.575694 | 0.531882 | -0.1142  | 0.021819 |
| TBC1D3    | 0.139258 | 0.145914 | 0.067361 | 0.326954 |
| TMSB15B   | 0.168171 | 0.173947 | 0.04872  | 0.973995 |
| DGCR6     | 0.101017 | 0.102975 | 0.02769  | 0.611734 |
| KRTAP13.4 | 0.313475 | 0.297183 | -0.077   | 0.397987 |
| GCSH      | 0.132012 | 0.136555 | 0.048816 | 0.241518 |
| MRPL4     | 0.134282 | 0.133054 | -0.01326 | 0.695666 |
| ARL6IP1   | 0.175318 | 0.174855 | -0.00382 | 0.582655 |
| SLC26A10  | 0.572884 | 0.594488 | 0.053405 | 0.15082  |
| GPC5      | 0.21926  | 0.227835 | 0.055347 | 0.130749 |
| ASF1A     | 0.405026 | 0.417014 | 0.042082 | 0.435377 |
| DUSP3     | 0.276323 | 0.26559  | -0.05716 | 0.051586 |
| USP17L2   | 0.338577 | 0.340165 | 0.006752 | 0.824935 |
| C17orf88  | 0.347793 | 0.330042 | -0.07558 | 0.112288 |
| URGCP     | 0.318149 | 0.319295 | 0.005188 | 0.712953 |
| GP1BA     | 0.476578 | 0.503421 | 0.079051 | 0.077181 |
| ARIH1     | 0.249959 | 0.257638 | 0.043654 | 0.121523 |
| TMEM232   | 0.302928 | 0.30618  | 0.015406 | 0.781715 |
| CCNG1     | 0.105602 | 0.115503 | 0.129288 | 0.144951 |
| SLC1A2    | 0.325538 | 0.325932 | 0.001748 | 0.940605 |
| OR2M3     | 0.16032  | 0.141907 | -0.17601 | 0.13075  |
| HAMP      | 0.204483 | 0.203425 | -0.00748 | 0.707751 |
| PET112L   | 0.296349 | 0.297819 | 0.007139 | 0.714691 |
| ISCA1     | 0.123131 | 0.138802 | 0.17283  | 0.000358 |
| ACACB     | 0.458201 | 0.437591 | -0.0664  | 0.000884 |
| UGGT2     | 0.2016   | 0.209304 | 0.054103 | 0.130157 |
| CELSR3    | 0.467958 | 0.50591  | 0.112499 | 0.006221 |
| FAM75A6   | 0.53729  | 0.520211 | -0.04661 | 0.295808 |
| GUCA1B    | 0.813668 | 0.803306 | -0.01849 | 0.285172 |
| APOBEC3F  | 0.498681 | 0.487772 | -0.03191 | 0.420449 |
| CATSPER2  | 0.61184  | 0.610294 | -0.00365 | 0.728639 |
| MAGEF1    | 0.062277 | 0.059856 | -0.05721 | 0.215439 |
| ZNF526    | 0.317265 | 0.312568 | -0.02152 | 0.48049  |
| SDPR      | 0.720178 | 0.728772 | 0.017113 | 0.431272 |

|          |          |          |          |          |
|----------|----------|----------|----------|----------|
| URM1     | 0.119827 | 0.126696 | 0.080421 | 0.159613 |
| FRMD4B   | 0.526861 | 0.534421 | 0.020556 | 0.156185 |
| LOC55420 | 0.285708 | 0.290704 | 0.025009 | 0.615005 |
| CNOT4    | 0.265634 | 0.26447  | -0.00634 | 0.865029 |
| SCOC     | 0.371829 | 0.36731  | -0.01764 | 0.680241 |
| PCGF6    | 0.114872 | 0.119413 | 0.05593  | 0.079946 |
| USP51    | 0.226158 | 0.239405 | 0.082119 | 0.250042 |
| REEP6    | 0.359701 | 0.357407 | -0.00923 | 0.452    |
| FICD     | 0.184066 | 0.180385 | -0.02914 | 0.315592 |
| SPEG     | 0.520657 | 0.523802 | 0.00869  | 0.313352 |
| ARAP3    | 0.401017 | 0.356032 | -0.17166 | 0.011835 |
| ADD3     | 0.320429 | 0.327358 | 0.030864 | 0.240583 |
| DKFZp686 | 0.037753 | 0.042604 | 0.174417 | 0.156859 |
| ICAM5    | 0.104397 | 0.107307 | 0.039662 | 0.975852 |
| MTBP     | 0.138768 | 0.134213 | -0.04815 | 0.198686 |
| WDR86    | 0.427288 | 0.429035 | 0.005885 | 0.783504 |
| CXorf56  | 0.260286 | 0.26733  | 0.038521 | 0.209469 |
| UBN1     | 0.381798 | 0.378959 | -0.01077 | 0.633129 |
| MIR184   | 0.306849 | 0.292186 | -0.07064 | 0.33157  |
| CYP4V2   | 0.264696 | 0.265075 | 0.002067 | 0.685369 |
| KBTBD8   | 0.193702 | 0.198619 | 0.036172 | 0.412439 |
| CNGA2    | 0.259479 | 0.254182 | -0.02976 | 0.67513  |
| CCND2    | 0.115242 | 0.117436 | 0.027199 | 0.781716 |
| CCNYL1   | 0.170678 | 0.174182 | 0.029315 | 0.247178 |
| ZNF441   | 0.115174 | 0.117901 | 0.03376  | 0.235943 |
| GRIN2A   | 0.336663 | 0.297149 | -0.18012 | 0.003105 |
| THAP3    | 0.383764 | 0.381825 | -0.00731 | 0.753264 |
| HSD17B6  | 0.532787 | 0.558122 | 0.067022 | 0.075635 |
| FAM182A  | 0.715035 | 0.734922 | 0.039577 | 0.17389  |
| COX7B2   | 0.155901 | 0.174911 | 0.165992 | 0.058666 |
| INS      | 0.708564 | 0.734517 | 0.051898 | 0.060237 |
| SLC6A14  | 0.652534 | 0.6753   | 0.049476 | 0.3034   |
| MGC16275 | 0.283489 | 0.271684 | -0.06136 | 0.152815 |
| SNHG12   | 0.294499 | 0.28855  | -0.02944 | 0.611735 |
| PDGFRB   | 0.446796 | 0.437685 | -0.02972 | 0.220666 |
| PDZD7    | 0.299124 | 0.290932 | -0.04006 | 0.336227 |
| GPR61    | 0.523589 | 0.490832 | -0.09321 | 0.060877 |
| NEUROG3  | 0.059945 | 0.058273 | -0.04079 | 0.619917 |
| SH3PXD2B | 0.461363 | 0.45269  | -0.02738 | 0.190676 |
| PCDH11X  | 0.170876 | 0.185326 | 0.117113 | 0.106612 |
| DDX5     | 0.374333 | 0.386037 | 0.044416 | 0.220667 |
| MIR187   | 0.714081 | 0.718506 | 0.008912 | 0.733893 |
| PAQR9    | 0.294678 | 0.323471 | 0.134499 | 0.080755 |
| PHF2     | 0.223782 | 0.227591 | 0.024349 | 0.164505 |
| DGUOK    | 0.261715 | 0.260346 | -0.00757 | 0.509929 |
| LOC28559 | 0.312804 | 0.309423 | -0.01568 | 0.66157  |
| VPS36    | 0.222947 | 0.226076 | 0.020106 | 0.428554 |
| SART1    | 0.465589 | 0.463765 | -0.00566 | 0.643106 |
| SPHK2    | 0.366678 | 0.377872 | 0.043384 | 0.342111 |
| RASA1    | 0.09     | 0.092754 | 0.043486 | 0.125492 |
| NPPA     | 0.605489 | 0.552322 | -0.13259 | 0.013849 |
| POM121L1 | 0.39774  | 0.3904   | -0.02687 | 0.180621 |
| NSF      | 0.540263 | 0.539331 | -0.00249 | 0.961001 |
| MSX2     | 0.120935 | 0.116635 | -0.05223 | 0.186761 |
| LOC15857 | 0.274317 | 0.281737 | 0.038508 | 0.427196 |
| C18orf16 | 0.504092 | 0.5114   | 0.020765 | 0.221545 |

|          |          |          |          |          |
|----------|----------|----------|----------|----------|
| FAM69B   | 0.361833 | 0.342136 | -0.08075 | 0.004404 |
| MIR369   | 0.78683  | 0.772782 | -0.02599 | 0.133735 |
| CRIP3    | 0.13592  | 0.136416 | 0.005255 | 0.41911  |
| LRRC23   | 0.171981 | 0.174266 | 0.019043 | 0.214586 |
| GFRA3    | 0.364157 | 0.361066 | -0.0123  | 0.538748 |
| ZNF649   | 0.096585 | 0.09835  | 0.026115 | 0.307792 |
| UNC84A   | 0.61776  | 0.615046 | -0.00635 | 0.505454 |
| C15orf55 | 0.654378 | 0.645756 | -0.01914 | 0.639773 |
| GPR180   | 0.163441 | 0.175681 | 0.104186 | 0.050205 |
| PAIP1    | 0.148509 | 0.151157 | 0.025501 | 0.535677 |
| MRI1     | 0.21802  | 0.222835 | 0.031513 | 0.923945 |
| NECAB2   | 0.277952 | 0.247437 | -0.16777 | 0.012071 |
| TMEM18   | 0.246369 | 0.240325 | -0.03584 | 0.274817 |
| POMZP3   | 0.185286 | 0.188317 | 0.023406 | 0.356497 |
| PLOD1    | 0.350765 | 0.344126 | -0.02757 | 0.346865 |
| ACTL9    | 0.286229 | 0.30229  | 0.078763 | 0.457622 |
| EYS      | 0.434649 | 0.448361 | 0.04481  | 0.037377 |
| RAB6A    | 0.166126 | 0.169876 | 0.0322   | 0.256814 |
| GPD2     | 0.299379 | 0.29987  | 0.002364 | 0.812269 |
| PDE3B    | 0.301086 | 0.310823 | 0.04592  | 0.039558 |
| NBPF15   | 0.411226 | 0.403907 | -0.02591 | 0.46328  |
| ZFP30    | 0.241499 | 0.246202 | 0.027824 | 0.376261 |
| EXTL3    | 0.504291 | 0.498801 | -0.01579 | 0.296881 |
| PPEF2    | 0.372817 | 0.408173 | 0.130712 | 0.006628 |
| SUPV3L1  | 0.05782  | 0.055987 | -0.04646 | 0.658193 |
| SP3      | 0.200384 | 0.20395  | 0.02545  | 0.39152  |
| RNF151   | 0.774271 | 0.774909 | 0.001187 | 0.876028 |
| ZNF221   | 0.211758 | 0.202857 | -0.06196 | 0.755033 |
| HERPUD2  | 0.20906  | 0.216001 | 0.047116 | 0.133741 |
| FTO      | 0.481256 | 0.479353 | -0.00571 | 0.587456 |
| SERPINA1 | 0.60893  | 0.581969 | -0.06533 | 0.266711 |
| VMAC     | 0.210031 | 0.206093 | -0.02731 | 0.366296 |
| SNORA16  | 0.074607 | 0.072052 | -0.05027 | 0.787084 |
| UBE2Q1   | 0.145841 | 0.142297 | -0.03549 | 0.493621 |
| SNORD11  | 0.424121 | 0.408068 | -0.05567 | 0.403207 |
| ZNF700   | 0.174511 | 0.171055 | -0.02885 | 0.524997 |
| PSCA     | 0.661588 | 0.649236 | -0.02719 | 0.336225 |
| ZSCAN5B  | 0.384627 | 0.405009 | 0.074492 | 0.481939 |
| KIF6     | 0.346224 | 0.350683 | 0.018462 | 0.476153 |
| NDE1     | 0.378377 | 0.370793 | -0.02921 | 0.388952 |
| RNF150   | 0.34485  | 0.335975 | -0.03762 | 0.134953 |
| TRIM10   | 0.373113 | 0.35904  | -0.05547 | 0.577873 |
| WDR74    | 0.179757 | 0.184012 | 0.033752 | 0.156866 |
| C9orf122 | 0.087889 | 0.077692 | -0.1779  | 0.407143 |
| GAL3ST1  | 0.54549  | 0.52683  | -0.05022 | 0.078357 |
| C21orf82 | 0.564025 | 0.576029 | 0.030382 | 0.291523 |
| PCNXL3   | 0.603932 | 0.59838  | -0.01332 | 0.279963 |
| SNORA59  | 0.674016 | 0.663751 | -0.02214 | 0.063486 |
| TMF1     | 0.099611 | 0.099968 | 0.005157 | 0.653149 |
| WDR69    | 0.180639 | 0.1773   | -0.02691 | 0.068986 |
| ZNF503   | 0.236174 | 0.252415 | 0.095947 | 0.387672 |
| CSNK1G2  | 0.59655  | 0.586205 | -0.02524 | 0.051585 |
| LAMP1    | 0.605426 | 0.600736 | -0.01122 | 0.390232 |
| DHCR24   | 0.410469 | 0.408158 | -0.00815 | 0.6101   |
| ASZ1     | 0.468068 | 0.518752 | 0.148327 | 0.067927 |
| TEKT5    | 0.441027 | 0.393659 | -0.16392 | 0.008687 |

|           |          |          |          |          |
|-----------|----------|----------|----------|----------|
| PPM1A     | 0.344175 | 0.353598 | 0.038968 | 0.209468 |
| IL17C     | 0.409967 | 0.434401 | 0.08352  | 0.235029 |
| AKR1C4    | 0.174864 | 0.166737 | -0.06866 | 0.585854 |
| BTBD16    | 0.571903 | 0.566806 | -0.01292 | 0.590667 |
| TSR1      | 0.223115 | 0.218822 | -0.02802 | 0.541826 |
| C21orf96  | 0.340276 | 0.324753 | -0.06736 | 0.401898 |
| WSCD2     | 0.428159 | 0.41074  | -0.05992 | 0.105606 |
| KRTAP3.3  | 0.111134 | 0.091971 | -0.27304 | 0.019766 |
| PTPRC     | 0.705392 | 0.737371 | 0.063965 | 0.199498 |
| LOC100121 | 0.339778 | 0.348226 | 0.035432 | 0.546467 |
| STAM2     | 0.101467 | 0.102087 | 0.008789 | 0.486298 |
| PPAT      | 0.6868   | 0.713941 | 0.055916 | 0.037803 |
| SNORD103  | 0.856798 | 0.873127 | 0.027236 | 0.157532 |
| MYEF2     | 0.235469 | 0.245645 | 0.061037 | 0.038673 |
| LONRF3    | 0.173583 | 0.188519 | 0.119083 | 0.356496 |
| LEUTX     | 0.248432 | 0.259049 | 0.060373 | 0.668337 |
| ZNF45     | 0.563697 | 0.56861  | 0.012521 | 0.66157  |
| BIN1      | 0.481014 | 0.474644 | -0.01923 | 0.163095 |
| SAMD7     | 0.27012  | 0.317049 | 0.231106 | 0.000855 |
| C15orf27  | 0.269351 | 0.269993 | 0.003432 | 0.855882 |
| CCDC102E  | 0.303554 | 0.313733 | 0.047585 | 0.047535 |
| NAMPT     | 0.259828 | 0.2661   | 0.034411 | 0.370013 |
| VPS4B     | 0.099012 | 0.101141 | 0.030683 | 0.224196 |
| C1orf52   | 0.26484  | 0.27466  | 0.05253  | 0.093646 |
| ALK       | 0.382977 | 0.382011 | -0.00365 | 0.714689 |
| OR8H2     | 0.139805 | 0.133858 | -0.0627  | 0.209469 |
| DRAM1     | 0.239192 | 0.256845 | 0.102729 | 0.065506 |
| GRIP2     | 0.372139 | 0.360994 | -0.04387 | 0.04046  |
| ADPRH     | 0.223961 | 0.208097 | -0.10599 | 0.042081 |
| SEMA4F    | 0.191661 | 0.191737 | 0.000566 | 0.774573 |
| CHI3L1    | 0.745255 | 0.722546 | -0.04465 | 0.003635 |
| TBCCD1    | 0.041663 | 0.041364 | -0.01038 | 0.870523 |
| SOX6      | 0.625873 | 0.632458 | 0.0151   | 0.181379 |
| ARRB2     | 0.259859 | 0.255138 | -0.02645 | 0.461861 |
| DLEU7     | 0.449822 | 0.4635   | 0.043216 | 0.407149 |
| KCTD15    | 0.38742  | 0.389395 | 0.007333 | 0.541828 |
| TMOD3     | 0.423077 | 0.428647 | 0.018869 | 0.427197 |
| TMED1     | 0.114641 | 0.117015 | 0.029573 | 0.343293 |
| KDM2B     | 0.418527 | 0.410171 | -0.02909 | 0.074114 |
| ACP6      | 0.083758 | 0.08949  | 0.095498 | 0.116562 |
| TTY20     | 0.505269 | 0.475143 | -0.08869 | 0.735648 |
| MDFIC     | 0.205251 | 0.205318 | 0.000468 | 0.537212 |
| GJA9      | 0.454176 | 0.446548 | -0.02444 | 0.386393 |
| GFOD2     | 0.279015 | 0.27971  | 0.003591 | 0.79965  |
| BDNFOS    | 0.231347 | 0.221866 | -0.06037 | 0.281005 |
| RAMP3     | 0.342116 | 0.330153 | -0.05135 | 0.132538 |
| PIGH      | 0.174577 | 0.179542 | 0.040458 | 0.220665 |
| PTGS2     | 0.132941 | 0.143457 | 0.109833 | 0.105106 |
| IGFL4     | 0.459448 | 0.429249 | -0.09809 | 0.247179 |
| KCNAB3    | 0.306287 | 0.280878 | -0.12494 | 0.076792 |
| HIST1H2BI | 0.128149 | 0.154144 | 0.26646  | 0.263718 |
| CXCR4     | 0.135119 | 0.120041 | -0.1707  | 0.017884 |
| FCER2     | 0.165106 | 0.160094 | -0.04447 | 0.343297 |
| CYP2A13   | 0.153604 | 0.151813 | -0.01693 | 0.264714 |
| C21orf71  | 0.386179 | 0.377079 | -0.0344  | 0.301216 |
| TMEM160   | 0.196044 | 0.191687 | -0.03243 | 0.273795 |

|          |          |          |          |          |
|----------|----------|----------|----------|----------|
| CYB5D2   | 0.176737 | 0.182595 | 0.047039 | 0.329256 |
| XAGE5    | 0.431634 | 0.408705 | -0.07875 | 0.179108 |
| LUZP2    | 0.241728 | 0.264679 | 0.130863 | 0.048323 |
| PHF14    | 0.090965 | 0.092243 | 0.020131 | 0.400588 |
| KCNAB1   | 0.426566 | 0.429161 | 0.008749 | 0.716427 |
| DHX16    | 0.354383 | 0.353922 | -0.00188 | 0.920247 |
| DSCR6    | 0.26623  | 0.259478 | -0.03706 | 0.983281 |
| LAS1L    | 0.182304 | 0.191933 | 0.074251 | 0.452001 |
| CD226    | 0.485214 | 0.494616 | 0.027689 | 0.123781 |
| NEIL1    | 0.447964 | 0.448767 | 0.002585 | 0.668336 |
| METT5D1  | 0.275712 | 0.275315 | -0.00208 | 0.447811 |
| IGLON5   | 0.421997 | 0.431995 | 0.033784 | 0.133138 |
| KCNS1    | 0.229659 | 0.244727 | 0.091677 | 0.145595 |
| RRM2     | 0.178138 | 0.179953 | 0.014624 | 0.788876 |
| INTS8    | 0.090963 | 0.095084 | 0.063921 | 0.198687 |
| GUCY2C   | 0.399205 | 0.379874 | -0.07161 | 0.308904 |
| DNAJC25  | 0.26319  | 0.273621 | 0.056075 | 0.42449  |
| KIAA0240 | 0.731707 | 0.715381 | -0.03255 | 0.349253 |
| RNF135   | 0.28348  | 0.267887 | -0.08162 | 0.711218 |
| ZNF622   | 0.175275 | 0.177176 | 0.015564 | 0.8797   |
| CEACAM7  | 0.244857 | 0.232828 | -0.07267 | 0.352867 |
| TRAPPC6A | 0.203672 | 0.21692  | 0.090919 | 0.152815 |
| PLCB4    | 0.556923 | 0.564689 | 0.019981 | 0.646448 |
| PFKM     | 0.371122 | 0.371603 | 0.001868 | 0.912856 |
| MRPS5    | 0.046792 | 0.046604 | -0.00582 | 0.876028 |
| AURKB    | 0.154759 | 0.155424 | 0.006187 | 0.573105 |
| FKBP5    | 0.345951 | 0.346833 | 0.003671 | 0.633126 |
| SMCR5    | 0.596742 | 0.603308 | 0.015786 | 0.52956  |
| SMAP1    | 0.315585 | 0.318344 | 0.012557 | 0.424491 |
| OR2G2    | 0.455503 | 0.479647 | 0.074511 | 0.226872 |
| EIF3L    | 0.107474 | 0.107773 | 0.004013 | 0.518942 |
| FAM160B2 | 0.517472 | 0.509552 | -0.02225 | 0.304495 |
| VPS52    | 0.44827  | 0.449905 | 0.005253 | 0.723396 |
| HLA.C    | 0.091487 | 0.099472 | 0.120734 | 0.071145 |
| KLF1     | 0.320389 | 0.30748  | -0.05933 | 0.411114 |
| GUCA2B   | 0.657036 | 0.639392 | -0.03927 | 0.077964 |
| NUP133   | 0.121266 | 0.122932 | 0.019687 | 0.276869 |
| IL17B    | 0.61364  | 0.575949 | -0.09145 | 0.013406 |
| IL23R    | 0.395892 | 0.389874 | -0.0221  | 0.901785 |
| IFT172   | 0.173644 | 0.170762 | -0.02415 | 0.423142 |
| HIST1H2A | 0.075283 | 0.076893 | 0.030534 | 0.213719 |
| EPB49    | 0.41134  | 0.421361 | 0.034724 | 0.228668 |
| SLC35F4  | 0.740294 | 0.667604 | -0.14911 | 0.01777  |
| TAS2R8   | 0.844889 | 0.873078 | 0.047348 | 0.306685 |
| WDR65    | 0.182995 | 0.174778 | -0.06628 | 0.070783 |
| SERPINB2 | 0.605495 | 0.576942 | -0.06969 | 0.200318 |
| FAM116A  | 0.043009 | 0.041161 | -0.06335 | 0.368754 |
| PRAMEF22 | 0.348609 | 0.340321 | -0.03471 | 0.74973  |
| BBS9     | 0.35886  | 0.363863 | 0.019972 | 0.375006 |
| B3GNT4   | 0.206894 | 0.207431 | 0.003739 | 0.659883 |
| FOSL1    | 0.197287 | 0.189633 | -0.05709 | 0.076792 |
| KIRREL2  | 0.246586 | 0.238991 | -0.04513 | 0.388951 |
| RAD51L1  | 0.445219 | 0.444597 | -0.00202 | 0.709481 |
| UBTF     | 0.156539 | 0.161653 | 0.046376 | 0.626512 |
| DIAPH3   | 0.396819 | 0.405195 | 0.030136 | 0.373754 |
| LOC15221 | 0.122067 | 0.118323 | -0.04494 | 0.503968 |

|           |          |          |          |          |
|-----------|----------|----------|----------|----------|
| HIATL2    | 0.189385 | 0.190011 | 0.004761 | 0.760347 |
| SIPA1L3   | 0.536262 | 0.520866 | -0.04203 | 0.038455 |
| LOC64250  | 0.058163 | 0.058914 | 0.018507 | 0.730385 |
| ECEL1P2   | 0.170877 | 0.162653 | -0.07116 | 0.427199 |
| RIC8A     | 0.188343 | 0.188471 | 0.000976 | 0.548015 |
| IL17RC    | 0.478953 | 0.459691 | -0.05922 | 0.015062 |
| TNS3      | 0.581638 | 0.605024 | 0.056871 | 0.268722 |
| ARHGAP28  | 0.508922 | 0.521083 | 0.034069 | 0.859539 |
| RLIM      | 0.252754 | 0.273613 | 0.1144   | 0.182142 |
| LOC73066  | 0.494934 | 0.477769 | -0.05092 | 0.063488 |
| REN       | 0.475583 | 0.45523  | -0.0631  | 0.016789 |
| GLTSCR1   | 0.472924 | 0.468693 | -0.01297 | 0.449203 |
| ARHGEF12  | 0.277827 | 0.278156 | 0.001709 | 0.938752 |
| OR1B1     | 0.28697  | 0.280297 | -0.03394 | 0.584254 |
| PCBD2     | 0.159272 | 0.15531  | -0.03634 | 0.421795 |
| RNF40     | 0.272089 | 0.271033 | -0.00561 | 0.942458 |
| REEP2     | 0.164376 | 0.165676 | 0.011366 | 0.434006 |
| NEBL      | 0.355318 | 0.35984  | 0.018244 | 0.44503  |
| C20orf165 | 0.479854 | 0.483712 | 0.011553 | 0.721653 |
| CELA1     | 0.796209 | 0.786892 | -0.01698 | 0.288333 |
| 6.Sep     | 0.362276 | 0.361703 | -0.00228 | 0.898098 |
| SLC46A1   | 0.178353 | 0.174472 | -0.03174 | 0.386393 |
| SLC2A12   | 0.306675 | 0.296637 | -0.04801 | 0.124922 |
| C18orf22  | 0.105396 | 0.106933 | 0.020882 | 0.460445 |
| KRTAP1.1  | 0.519492 | 0.504776 | -0.04146 | 0.262723 |
| CEBPA     | 0.093609 | 0.094392 | 0.012012 | 0.801449 |
| ZDHHC17   | 0.253603 | 0.256991 | 0.019146 | 0.51894  |
| GPR65     | 0.760995 | 0.770949 | 0.018748 | 0.521963 |
| CCDC92    | 0.610422 | 0.619981 | 0.022416 | 0.137399 |
| NLRP1     | 0.310775 | 0.293074 | -0.08461 | 0.061198 |
| TPM1      | 0.297066 | 0.29516  | -0.00929 | 0.397984 |
| ZADH2     | 0.289241 | 0.256493 | -0.17335 | 0.039558 |
| AGTRAP    | 0.314827 | 0.304462 | -0.0483  | 0.071147 |
| ZNF391    | 0.199832 | 0.218057 | 0.125918 | 0.035503 |
| DCLK1     | 0.362245 | 0.365798 | 0.014083 | 0.380043 |
| EVI2A     | 0.73101  | 0.724455 | -0.01299 | 0.292589 |
| MEOX2     | 0.074106 | 0.062196 | -0.25278 | 0.837647 |
| SNORA9    | 0.050268 | 0.048648 | -0.04725 | 0.392795 |
| FAM55A    | 0.259848 | 0.249536 | -0.05842 | 0.529561 |
| WDFY4     | 0.62486  | 0.61256  | -0.02868 | 0.573105 |
| DDX46     | 0.202068 | 0.204341 | 0.016134 | 0.636446 |
| CRYAA     | 0.721954 | 0.677083 | -0.09257 | 0.057126 |
| LOC28636  | 0.568954 | 0.599928 | 0.076478 | 0.282045 |
| RAI14     | 0.332813 | 0.37687  | 0.179354 | 0.011223 |
| UBA2      | 0.092127 | 0.087271 | -0.07812 | 0.15892  |
| NBPF7     | 0.43165  | 0.454826 | 0.075453 | 0.331571 |
| ASNSD1    | 0.1236   | 0.120062 | -0.04189 | 0.587457 |
| C1QB      | 0.583278 | 0.574097 | -0.02289 | 0.28518  |
| SLCO2A1   | 0.189122 | 0.184001 | -0.0396  | 0.449205 |
| CRP       | 0.489045 | 0.534217 | 0.127459 | 0.183672 |
| KIAA0513  | 0.454237 | 0.424027 | -0.09929 | 0.001411 |
| NAP1L5    | 0.437888 | 0.483371 | 0.142568 | 0.206943 |
| CD72      | 0.426748 | 0.402054 | -0.08599 | 0.00171  |
| HSP90B3P  | 0.367316 | 0.401605 | 0.128753 | 0.05774  |
| SNTG2     | 0.581617 | 0.569796 | -0.02962 | 0.068631 |
| PAOX      | 0.327282 | 0.322755 | -0.02009 | 0.330411 |

|          |          |          |          |          |
|----------|----------|----------|----------|----------|
| MAP7D2   | 0.335036 | 0.35508  | 0.083826 | 0.005093 |
| DGKI     | 0.473074 | 0.478975 | 0.017886 | 0.351659 |
| RFPL4A   | 0.218075 | 0.208682 | -0.06352 | 0.271759 |
| GRIN2C   | 0.221215 | 0.213972 | -0.04803 | 0.365063 |
| HEATR5A  | 0.407568 | 0.424043 | 0.057169 | 0.243393 |
| YWHAE    | 0.193692 | 0.197076 | 0.024983 | 0.342111 |
| TPCN1    | 0.538781 | 0.532853 | -0.01596 | 0.360152 |
| CHAF1B   | 0.369096 | 0.382934 | 0.053101 | 0.118748 |
| C14orf80 | 0.351861 | 0.34734  | -0.01866 | 0.579464 |
| MOBK1A   | 0.210566 | 0.211029 | 0.003169 | 0.866861 |
| HIST1H4L | 0.241395 | 0.268438 | 0.15319  | 0.678536 |
| MAP3K11  | 0.4052   | 0.40399  | -0.00431 | 0.460446 |
| CYP2J2   | 0.22082  | 0.187032 | -0.23959 | 0.055922 |
| ESCO2    | 0.286661 | 0.287988 | 0.006667 | 0.712954 |
| ZNF142   | 0.302322 | 0.301039 | -0.00614 | 0.857711 |
| LY6G6C   | 0.641711 | 0.61226  | -0.06778 | 0.112814 |
| KIAA0319 | 0.214362 | 0.197835 | -0.11575 | 0.010499 |
| C6orf129 | 0.253892 | 0.243409 | -0.06084 | 0.15483  |
| ITGB8    | 0.303454 | 0.30583  | 0.011253 | 0.618283 |
| CCDC124  | 0.234501 | 0.231155 | -0.02074 | 0.242453 |
| LOC64174 | 0.692696 | 0.734192 | 0.083934 | 0.169509 |
| AFAP1L1  | 0.237442 | 0.229768 | -0.0474  | 0.058665 |
| S100PBP  | 0.216639 | 0.214905 | -0.0116  | 0.380041 |
| NXF3     | 0.514238 | 0.521882 | 0.021287 | 0.523479 |
| ABHD15   | 0.328775 | 0.316035 | -0.05702 | 0.380042 |
| CBFA2T2  | 0.34495  | 0.341213 | -0.01571 | 0.427197 |
| LCK      | 0.468801 | 0.454175 | -0.04573 | 0.048589 |
| CNOT10   | 0.141873 | 0.144258 | 0.024048 | 0.165212 |
| LRRC28   | 0.081743 | 0.086627 | 0.083736 | 0.205272 |
| LY6K     | 0.436056 | 0.430203 | -0.0195  | 0.718169 |
| ALDH2    | 0.303085 | 0.300883 | -0.01052 | 0.505455 |
| MIR145   | 0.753244 | 0.753386 | 0.00027  | 0.86686  |
| IL31     | 0.846908 | 0.829474 | -0.03001 | 0.008278 |
| CA5BP    | 0.148244 | 0.146756 | -0.01456 | 0.535677 |
| CNIH3    | 0.243881 | 0.245099 | 0.007187 | 0.815882 |
| RPL13P5  | 0.595514 | 0.594966 | -0.00133 | 0.983281 |
| WIPF1    | 0.534954 | 0.525983 | -0.0244  | 0.278929 |
| GCLM     | 0.128677 | 0.122518 | -0.07075 | 0.074114 |
| SERP2    | 0.422373 | 0.429062 | 0.022668 | 0.41777  |
| USP48    | 0.235702 | 0.23729  | 0.009682 | 0.605217 |
| EMX2     | 0.125562 | 0.108794 | -0.2068  | 0.023909 |
| CSTF2T   | 0.112514 | 0.113761 | 0.015908 | 0.7462   |
| ADAM7    | 0.62899  | 0.613465 | -0.03606 | 0.07915  |
| MIR518F  | 0.059686 | 0.056827 | -0.07081 | 0.411109 |
| AURKAIP1 | 0.344746 | 0.352538 | 0.032246 | 0.191465 |
| FAM25A   | 0.500913 | 0.492496 | -0.02445 | 0.160999 |
| KCNH6    | 0.468642 | 0.461716 | -0.02148 | 0.208623 |
| NRBF2    | 0.196004 | 0.198785 | 0.020325 | 0.459031 |
| KPNA4    | 0.123465 | 0.125793 | 0.02695  | 0.184439 |
| CT62     | 0.34515  | 0.33739  | -0.03281 | 0.531087 |
| ROM1     | 0.456073 | 0.443847 | -0.0392  | 0.065165 |
| RBBP7    | 0.173493 | 0.179344 | 0.047852 | 0.634787 |
| LBX2     | 0.276753 | 0.272853 | -0.02048 | 0.644777 |
| HIBCH    | 0.063925 | 0.065108 | 0.026476 | 0.09972  |
| MRGPRX3  | 0.385546 | 0.427742 | 0.149837 | 0.01376  |
| PARVB    | 0.387143 | 0.374104 | -0.04943 | 0.41911  |

|          |          |          |          |          |
|----------|----------|----------|----------|----------|
| CLCA3P   | 0.445096 | 0.504659 | 0.181195 | 0.027289 |
| EHMT2    | 0.541817 | 0.540861 | -0.00255 | 0.792463 |
| RRP7B    | 0.233599 | 0.234332 | 0.004523 | 0.584254 |
| FAM90A7  | 0.438439 | 0.447513 | 0.029554 | 0.534145 |
| BBC3     | 0.17572  | 0.171426 | -0.03569 | 0.336229 |
| MIR523   | 0.254169 | 0.254804 | 0.003598 | 0.868693 |
| CXorf59  | 0.250222 | 0.302904 | 0.275651 | 0.028448 |
| MYO1H    | 0.600248 | 0.594551 | -0.01376 | 0.031255 |
| RPL6     | 0.206403 | 0.195575 | -0.07774 | 0.064828 |
| LSM7     | 0.596054 | 0.585235 | -0.02643 | 0.112816 |
| UBE2QP1  | 0.123525 | 0.131293 | 0.087992 | 0.017884 |
| STK38    | 0.143743 | 0.136666 | -0.07283 | 0.335058 |
| FAM75A1  | 0.437831 | 0.467302 | 0.093981 | 0.194652 |
| ETHE1    | 0.144363 | 0.144891 | 0.005269 | 0.894414 |
| APOBEC3A | 0.714556 | 0.671054 | -0.09062 | 0.004912 |
| STARD7   | 0.135103 | 0.139117 | 0.042238 | 0.024495 |
| UPP2     | 0.679108 | 0.686265 | 0.015127 | 0.284129 |
| IFI44    | 0.37134  | 0.390555 | 0.072786 | 0.367533 |
| C3orf31  | 0.305159 | 0.303367 | -0.0085  | 0.881538 |
| UNC45A   | 0.11156  | 0.108889 | -0.03496 | 0.385112 |
| CEP152   | 0.265105 | 0.267911 | 0.015188 | 0.57469  |
| HYMAI    | 0.391638 | 0.406049 | 0.052134 | 0.103615 |
| CTAGE1   | 0.812194 | 0.796101 | -0.02887 | 0.049658 |
| VN1R5    | 0.378329 | 0.412549 | 0.124927 | 0.019041 |
| SLITRK3  | 0.168277 | 0.162516 | -0.05026 | 0.683659 |
| HSP90B1  | 0.517519 | 0.523423 | 0.016365 | 0.697388 |
| LITAF    | 0.368514 | 0.363059 | -0.02151 | 0.438122 |
| BCL7B    | 0.121747 | 0.124824 | 0.036013 | 0.352867 |
| C2CD2    | 0.349468 | 0.412179 | 0.238113 | 0.017772 |
| ZNF542   | 0.141908 | 0.145612 | 0.037175 | 0.351659 |
| SCLT1    | 0.246132 | 0.248536 | 0.014027 | 0.603592 |
| NFRKB    | 0.283164 | 0.278735 | -0.02274 | 0.446418 |
| ZNF689   | 0.259467 | 0.253341 | -0.03447 | 0.340929 |
| PER3     | 0.509282 | 0.515629 | 0.017866 | 0.263718 |
| MIR493   | 0.626713 | 0.628927 | 0.005088 | 0.555794 |
| DDX20    | 0.154166 | 0.1549   | 0.006861 | 0.628163 |
| CEACAM5  | 0.139137 | 0.134892 | -0.0447  | 0.260744 |
| TSKS     | 0.298487 | 0.315395 | 0.07949  | 0.266713 |
| ZNF41    | 0.140122 | 0.162007 | 0.209375 | 0.086152 |
| TTC16    | 0.388073 | 0.372148 | -0.06045 | 0.031439 |
| MOSPD1   | 0.135067 | 0.143955 | 0.091943 | 0.150819 |
| DDX11    | 0.239091 | 0.234613 | -0.02727 | 0.205274 |
| TMEM179F | 0.14189  | 0.148188 | 0.06265  | 0.018224 |
| ADAM21   | 0.370003 | 0.392007 | 0.083344 | 0.064828 |
| C19orf40 | 0.056998 | 0.057171 | 0.004364 | 0.453392 |
| TMEM56   | 0.26577  | 0.267884 | 0.011433 | 0.577871 |
| RBP1     | 0.254132 | 0.2542   | 0.000386 | 0.760347 |
| H3F3C    | 0.332239 | 0.362776 | 0.126857 | 0.024943 |
| PRR14    | 0.191792 | 0.200091 | 0.061114 | 0.336229 |
| STAT6    | 0.484794 | 0.464516 | -0.06164 | 0.180619 |
| RNF185   | 0.144803 | 0.14513  | 0.003256 | 0.673429 |
| C11orf70 | 0.09275  | 0.087861 | -0.07812 | 0.275839 |
| BDKRB2   | 0.265494 | 0.25181  | -0.07634 | 0.02077  |
| FHL3     | 0.379173 | 0.381017 | 0.007    | 0.51593  |
| MRPS36   | 0.092751 | 0.092825 | 0.00115  | 0.496563 |
| DNMT3A   | 0.441693 | 0.43871  | -0.00978 | 0.477596 |

|          |          |          |           |          |
|----------|----------|----------|-----------|----------|
| USP6     | 0.535109 | 0.547865 | 0.033989  | 0.363831 |
| COL13A1  | 0.36521  | 0.354246 | -0.04397  | 0.055921 |
| LEPRE1   | 0.178699 | 0.181201 | 0.020058  | 0.22331  |
| APCDD1L  | 0.519967 | 0.504995 | -0.04215  | 0.290462 |
| KRT77    | 0.47161  | 0.427111 | -0.14298  | 0.019889 |
| PPP3R2   | 0.813634 | 0.819662 | 0.010649  | 0.631468 |
| PSD3     | 0.465043 | 0.465035 | -2.51E-05 | 0.528035 |
| ADAM30   | 0.446717 | 0.518089 | 0.213838  | 0.04806  |
| SLC5A10  | 0.622466 | 0.614194 | -0.0193   | 0.108648 |
| OPN1MW   | 0.271749 | 0.274725 | 0.015714  | 0.830379 |
| F3       | 0.275498 | 0.28161  | 0.031657  | 0.361375 |
| EXT1     | 0.472184 | 0.479402 | 0.021886  | 0.23965  |
| LCE1C    | 0.218122 | 0.206194 | -0.08114  | 0.316718 |
| RG9MTD2  | 0.053809 | 0.050092 | -0.10328  | 0.235941 |
| TIAM1    | 0.357187 | 0.347434 | -0.03994  | 0.275842 |
| C6orf62  | 0.248978 | 0.248559 | -0.00243  | 0.806855 |
| ZNF2     | 0.25342  | 0.251158 | -0.01293  | 0.70602  |
| OR2M1P   | 0.405145 | 0.407952 | 0.009963  | 0.587458 |
| DBNDD2   | 0.295578 | 0.300471 | 0.023688  | 0.367533 |
| DMBT1    | 0.440192 | 0.418801 | -0.07187  | 0.098767 |
| CLSTN1   | 0.493772 | 0.491266 | -0.00734  | 0.742677 |
| DNASE2B  | 0.519174 | 0.527662 | 0.023398  | 0.324661 |
| TMEM161F | 0.133758 | 0.137429 | 0.03906   | 0.30013  |
| NHEDC1   | 0.043363 | 0.03256  | -0.41336  | 0.687033 |
| VSTM2A   | 0.214399 | 0.215671 | 0.008535  | 0.70602  |
| CNTN2    | 0.40672  | 0.391104 | -0.05648  | 0.001987 |
| NME1.NM  | 0.378388 | 0.382596 | 0.015955  | 0.623215 |
| PCID2    | 0.418218 | 0.404986 | -0.04638  | 0.118748 |
| MAVS     | 0.100855 | 0.103302 | 0.034583  | 0.492151 |
| UFC1     | 0.091976 | 0.094449 | 0.03828   | 0.328097 |
| TCEB1    | 0.166179 | 0.168331 | 0.01856   | 0.382573 |
| UCN      | 0.222824 | 0.234159 | 0.071588  | 0.91101  |
| LILRB2   | 0.265914 | 0.269955 | 0.021762  | 0.868693 |
| POLD4    | 0.13425  | 0.135856 | 0.017155  | 0.358931 |
| ZMPSTE24 | 0.071012 | 0.075117 | 0.081075  | 0.052144 |
| ZKSCAN1  | 0.41227  | 0.414813 | 0.00887   | 0.355285 |
| PCDHGA4  | 0.497046 | 0.506551 | 0.027326  | 0.590669 |
| PARP12   | 0.373565 | 0.37487  | 0.005032  | 0.723398 |
| SDC2     | 0.40798  | 0.407402 | -0.00205  | 0.883376 |
| MGC2327C | 0.339194 | 0.330851 | -0.03593  | 0.249083 |
| TRAF5    | 0.424677 | 0.410127 | -0.05029  | 0.06382  |
| MAPT     | 0.390663 | 0.397796 | 0.026107  | 0.288342 |
| C19orf41 | 0.148926 | 0.159234 | 0.096556  | 0.148189 |
| FAM20B   | 0.317096 | 0.314137 | -0.01352  | 0.962857 |
| KLK7     | 0.115181 | 0.118746 | 0.043975  | 0.526515 |
| SPDYE5   | 0.718416 | 0.716344 | -0.00417  | 0.935047 |
| SCARNA1C | 0.538797 | 0.533372 | -0.0146   | 0.352865 |
| ZAP70    | 0.639046 | 0.649662 | 0.02377   | 0.666641 |
| USP22    | 0.300974 | 0.303789 | 0.013432  | 0.664951 |
| FMR1NB   | 0.623214 | 0.667212 | 0.098417  | 0.249086 |
| TMEM39B  | 0.090457 | 0.094446 | 0.062261  | 0.150817 |
| IGSF9    | 0.499448 | 0.491229 | -0.02394  | 0.071148 |
| MIER2    | 0.558347 | 0.559701 | 0.003494  | 0.765672 |
| ZNF493   | 0.24061  | 0.242759 | 0.012826  | 0.681948 |
| TAAR9    | 0.447104 | 0.479918 | 0.102176  | 0.420452 |
| CARD9    | 0.744969 | 0.740952 | -0.0078   | 0.318964 |

|          |          |          |          |          |
|----------|----------|----------|----------|----------|
| SERPINI1 | 0.105919 | 0.091608 | -0.20942 | 0.026966 |
| VDAC1    | 0.261855 | 0.256584 | -0.02934 | 0.32124  |
| TMEM150  | 0.151211 | 0.150568 | -0.00614 | 0.695665 |
| TDO2     | 0.347624 | 0.372792 | 0.100843 | 0.212871 |
| LRGUK    | 0.20817  | 0.200562 | -0.05372 | 0.11765  |
| SNORD11  | 0.497985 | 0.521944 | 0.067792 | 0.361375 |
| PPP1R2P3 | 0.440116 | 0.437589 | -0.00831 | 0.905474 |
| HNF4G    | 0.470601 | 0.513299 | 0.125295 | 0.007674 |
| IL15RA   | 0.245889 | 0.248816 | 0.017071 | 0.501001 |
| ALAD     | 0.304117 | 0.305053 | 0.004432 | 0.890732 |
| DNMT3L   | 0.380024 | 0.388266 | 0.030953 | 0.819501 |
| CHORDC1  | 0.125387 | 0.114112 | -0.13594 | 0.094101 |
| BOLA1    | 0.14082  | 0.159351 | 0.178353 | 0.01264  |
| TXNRD2   | 0.302123 | 0.293056 | -0.04396 | 0.080351 |
| OR52E6   | 0.649571 | 0.698    | 0.103739 | 0.233197 |
| ALS2CR8  | 0.165615 | 0.173229 | 0.064847 | 0.116023 |
| PIP4K2B  | 0.322384 | 0.324599 | 0.009877 | 0.585855 |
| ARX      | 0.268502 | 0.276157 | 0.040553 | 0.846755 |
| HEPN1    | 0.62763  | 0.609032 | -0.0434  | 0.244336 |
| C21orf99 | 0.306388 | 0.309883 | 0.016364 | 0.456212 |
| CHPF2    | 0.327859 | 0.33136  | 0.015327 | 0.670033 |
| FAM198A  | 0.425289 | 0.408265 | -0.05894 | 0.336229 |
| ANKS4B   | 0.365521 | 0.340881 | -0.10069 | 0.381306 |
| PLEKHO2  | 0.216783 | 0.21866  | 0.01244  | 0.474713 |
| SIX4     | 0.153372 | 0.158566 | 0.048055 | 0.238722 |
| SLC35F3  | 0.405687 | 0.388976 | -0.06069 | 0.184438 |
| SIGLEC8  | 0.239568 | 0.237483 | -0.01261 | 0.746202 |
| SNORA42  | 0.63749  | 0.643113 | 0.012668 | 0.377515 |
| TRIM36   | 0.287106 | 0.288074 | 0.004858 | 0.803251 |
| LOC38895 | 0.688679 | 0.704334 | 0.032429 | 0.082796 |
| LOC22144 | 0.675063 | 0.678076 | 0.006424 | 0.735646 |
| RNF8     | 0.215583 | 0.212234 | -0.02259 | 0.699111 |
| CCM2     | 0.330546 | 0.335232 | 0.020309 | 0.217177 |
| NEUROD6  | 0.47335  | 0.399171 | -0.2459  | 0.023194 |
| ARHGDI   | 0.220785 | 0.219608 | -0.00771 | 0.666643 |
| ODF1     | 0.761776 | 0.749517 | -0.0234  | 0.064822 |
| SPRED1   | 0.211871 | 0.213849 | 0.013407 | 0.466124 |
| FAM71E2  | 0.43628  | 0.413587 | -0.07707 | 0.011149 |
| MCCC2    | 0.054335 | 0.054097 | -0.00633 | 0.935047 |
| C1orf69  | 0.329285 | 0.331659 | 0.010364 | 0.898098 |
| FAM72A   | 0.049963 | 0.050244 | 0.008095 | 0.579455 |
| SH2D5    | 0.192511 | 0.189556 | -0.02232 | 0.546464 |
| ITFG1    | 0.514741 | 0.541568 | 0.073296 | 0.142399 |
| RASSF1   | 0.375759 | 0.379886 | 0.015759 | 0.247178 |
| PAFAH1B1 | 0.290148 | 0.291817 | 0.008274 | 0.566784 |
| PTMS     | 0.101478 | 0.10745  | 0.082502 | 0.217176 |
| LRRC25   | 0.274708 | 0.250788 | -0.13143 | 0.035913 |
| NBPF3    | 0.127109 | 0.13199  | 0.054361 | 0.098767 |
| OR14J1   | 0.313418 | 0.304145 | -0.04333 | 0.443645 |
| METTL11A | 0.32459  | 0.313527 | -0.05003 | 0.310012 |
| SKA1     | 0.026709 | 0.027117 | 0.021839 | 0.424409 |
| ANKRD26  | 0.484282 | 0.520911 | 0.10519  | 0.058047 |
| PLD3     | 0.095973 | 0.098184 | 0.032871 | 0.099717 |
| C11orf85 | 0.568827 | 0.53696  | -0.08317 | 0.23687  |
| KRT3     | 0.458087 | 0.419851 | -0.12575 | 0.047536 |
| TMEM155  | 0.187448 | 0.201522 | 0.104451 | 0.428555 |

|           |          |          |           |          |
|-----------|----------|----------|-----------|----------|
| LOC15052  | 0.621504 | 0.593063 | -0.06758  | 0.006354 |
| IPO13     | 0.183148 | 0.179329 | -0.0304   | 0.486302 |
| FLJ46111  | 0.705069 | 0.683977 | -0.04382  | 0.167349 |
| NOP10     | 0.108863 | 0.109413 | 0.007278  | 0.589061 |
| TPPP2     | 0.593729 | 0.576571 | -0.0423   | 0.087438 |
| RIMS3     | 0.209315 | 0.21838  | 0.061169  | 0.147537 |
| AUTS2     | 0.502395 | 0.500766 | -0.00468  | 0.826749 |
| MDH2      | 0.211105 | 0.207267 | -0.02647  | 0.146237 |
| C8orf34   | 0.259953 | 0.268951 | 0.049095  | 0.850404 |
| POGZ      | 0.33567  | 0.338555 | 0.012349  | 0.511427 |
| G2E3      | 0.066036 | 0.063465 | -0.05729  | 0.719906 |
| MIR1185.2 | 0.754507 | 0.758541 | 0.007693  | 0.250032 |
| KBTBD6    | 0.116312 | 0.110697 | -0.07138  | 0.201141 |
| WDR52     | 0.464865 | 0.497231 | 0.097105  | 0.116022 |
| CCDC109A  | 0.275674 | 0.273588 | -0.01096  | 0.661571 |
| NAAA      | 0.342241 | 0.353022 | 0.044745  | 0.197065 |
| CYP19A1   | 0.328724 | 0.337821 | 0.039386  | 0.855883 |
| APOO      | 0.190148 | 0.211589 | 0.15414   | 0.120408 |
| FUT11     | 0.085934 | 0.091767 | 0.094746  | 0.480487 |
| CTAGE6    | 0.387849 | 0.398202 | 0.038006  | 0.537212 |
| REEP4     | 0.235204 | 0.228668 | -0.04066  | 0.333894 |
| PLGLA     | 0.518498 | 0.534203 | 0.043051  | 0.323517 |
| KRTAP19.4 | 0.36845  | 0.360686 | -0.03073  | 0.587458 |
| C17orf80  | 0.174106 | 0.172446 | -0.01382  | 0.749728 |
| RASA2     | 0.371754 | 0.37175  | -1.69E-05 | 0.922096 |
| C6orf146  | 0.865244 | 0.834001 | -0.05306  | 0.490647 |
| NUDC      | 0.087843 | 0.089257 | 0.023033  | 0.554234 |
| SFXN1     | 0.248604 | 0.250216 | 0.009323  | 0.639773 |
| HOXC9     | 0.152833 | 0.147451 | -0.05173  | 0.381306 |
| LOC34802  | 0.480041 | 0.514509 | 0.100039  | 0.310012 |
| MIR1826   | 0.361447 | 0.376608 | 0.05928   | 0.460446 |
| CELP      | 0.633031 | 0.623846 | -0.02108  | 0.73214  |
| POTEE     | 0.680994 | 0.670089 | -0.02329  | 0.565206 |
| HAGH      | 0.377347 | 0.372972 | -0.01683  | 0.321238 |
| RBMY1A3F  | 0.222182 | 0.215039 | -0.04714  | 0.870494 |
| CHRM2     | 0.290881 | 0.292763 | 0.009305  | 0.605218 |
| GPR63     | 0.185389 | 0.193224 | 0.059719  | 0.138636 |
| KLHL31    | 0.349582 | 0.368807 | 0.077235  | 0.329256 |
| RPS15     | 0.203878 | 0.19469  | -0.06653  | 0.189889 |
| CD28      | 0.638969 | 0.643878 | 0.011042  | 0.314471 |
| NCKAP1    | 0.163702 | 0.167591 | 0.033868  | 0.526515 |
| OR5B17    | 0.260431 | 0.229938 | -0.17965  | 0.170236 |
| GRIA1     | 0.580354 | 0.584728 | 0.010834  | 0.509929 |
| ITPA      | 0.193511 | 0.196869 | 0.024823  | 0.324659 |
| ATP2B4    | 0.365581 | 0.355601 | -0.03993  | 0.247177 |
| CYP4F3    | 0.236361 | 0.229314 | -0.04367  | 0.322378 |
| TM4SF18   | 0.456272 | 0.531923 | 0.221321  | 0.002251 |
| YIPF7     | 0.234572 | 0.237845 | 0.019994  | 0.60035  |
| TRIM28    | 0.11159  | 0.112125 | 0.006907  | 0.454805 |
| EML5      | 0.18424  | 0.178382 | -0.04662  | 0.387671 |
| ERMAP     | 0.304715 | 0.300544 | -0.01989  | 0.592276 |
| MAMDC2    | 0.568912 | 0.54463  | -0.06293  | 0.161    |
| FBXL4     | 0.189419 | 0.196652 | 0.054064  | 0.163094 |
| MESDC2    | 0.196579 | 0.190864 | -0.04257  | 0.346863 |
| RIF1      | 0.125618 | 0.126614 | 0.011398  | 0.903629 |
| ZNF354A   | 0.195793 | 0.20433  | 0.061577  | 0.077964 |

|          |          |          |           |          |
|----------|----------|----------|-----------|----------|
| LOC10028 | 0.228482 | 0.24043  | 0.073531  | 0.670033 |
| DISC2    | 0.84795  | 0.882129 | 0.05701   | 0.562053 |
| ASH1L    | 0.363947 | 0.361272 | -0.01064  | 0.537211 |
| EBF3     | 0.623843 | 0.595037 | -0.0682   | 0.000193 |
| ZFP41    | 0.440323 | 0.439397 | -0.00304  | 0.769228 |
| SCNN1A   | 0.518633 | 0.508036 | -0.02978  | 0.659882 |
| ARPC1B   | 0.357516 | 0.355797 | -0.00695  | 0.70602  |
| C5orf41  | 0.172126 | 0.1757   | 0.02965   | 0.106108 |
| ZNF668   | 0.46862  | 0.463986 | -0.01434  | 0.498041 |
| NPHP3    | 0.357897 | 0.368872 | 0.043575  | 0.383845 |
| GJD2     | 0.253567 | 0.253906 | 0.001923  | 0.624861 |
| AMPH     | 0.413421 | 0.430586 | 0.05869   | 0.390234 |
| WNT8B    | 0.294369 | 0.311106 | 0.07978   | 0.079949 |
| TPST1    | 0.221099 | 0.218214 | -0.01895  | 0.45621  |
| ID3      | 0.231141 | 0.213212 | -0.11648  | 0.085303 |
| ARPP.21  | 0.709227 | 0.680505 | -0.05964  | 0.08404  |
| RUNX1T1  | 0.47392  | 0.489133 | 0.045582  | 0.164506 |
| CFI      | 0.17776  | 0.193612 | 0.123238  | 0.338574 |
| C10orf71 | 0.80326  | 0.782295 | -0.03815  | 0.023475 |
| HSFYP1   | 0.24072  | 0.223273 | -0.10855  | 0.104608 |
| GAS2L3   | 0.168155 | 0.166488 | -0.01437  | 0.225977 |
| TSPAN7   | 0.179192 | 0.202315 | 0.175097  | 0.131343 |
| HRCT1    | 0.547509 | 0.53327  | -0.03802  | 0.246228 |
| BIK      | 0.169718 | 0.158309 | -0.10039  | 0.002018 |
| CUBN     | 0.509193 | 0.481844 | -0.07965  | 0.046246 |
| SMTNL2   | 0.461071 | 0.434123 | -0.08689  | 0.044    |
| RAB1A    | 0.233099 | 0.233848 | 0.004633  | 0.77101  |
| HKDC1    | 0.635755 | 0.606417 | -0.06816  | 0.055921 |
| BOD1     | 0.136247 | 0.136339 | 0.000977  | 0.538748 |
| OGDH     | 0.210319 | 0.20742  | -0.02002  | 0.296884 |
| SIDT1    | 0.238149 | 0.238901 | 0.004554  | 0.788877 |
| SLC35A3  | 0.151663 | 0.155733 | 0.038203  | 0.163098 |
| SNORD114 | 0.687558 | 0.747672 | 0.120925  | 0.099244 |
| ZNF836   | 0.213975 | 0.214984 | 0.006785  | 0.636446 |
| DPY19L4  | 0.122443 | 0.130777 | 0.094996  | 0.027616 |
| BMP2K    | 0.162992 | 0.16686  | 0.033844  | 0.278931 |
| RHEB     | 0.289175 | 0.292398 | 0.01599   | 0.404518 |
| C2orf27A | 0.290228 | 0.298989 | 0.042907  | 0.178355 |
| ZFP37    | 0.097691 | 0.095948 | -0.02597  | 0.577872 |
| PSG3     | 0.256256 | 0.250732 | -0.03144  | 0.449205 |
| EIF2C4   | 0.127746 | 0.137474 | 0.105885  | 0.039336 |
| SIRPA    | 0.361779 | 0.35236  | -0.03806  | 0.180619 |
| FAM153B  | 0.340814 | 0.30709  | -0.15032  | 0.19626  |
| PACSIN1  | 0.274919 | 0.263675 | -0.06025  | 0.05774  |
| ABP1     | 0.651778 | 0.654071 | 0.005066  | 0.436744 |
| RRP9     | 0.285553 | 0.281364 | -0.02132  | 0.568361 |
| TNFRSF21 | 0.497139 | 0.527946 | 0.086739  | 0.148844 |
| HEATR1   | 0.200449 | 0.200438 | -7.88E-05 | 0.885214 |
| DGAT1    | 0.174193 | 0.170918 | -0.02738  | 0.390236 |
| SLC7A6OS | 0.373595 | 0.372365 | -0.00476  | 0.929495 |
| FBXL8    | 0.207775 | 0.213813 | 0.041328  | 0.584254 |
| SPINLW1  | 0.161248 | 0.154198 | -0.0645   | 0.292592 |
| NANP     | 0.151679 | 0.152244 | 0.005364  | 0.721654 |
| FAM163B  | 0.518816 | 0.482667 | -0.10419  | 0.012151 |
| RNF4     | 0.211194 | 0.211579 | 0.002623  | 0.368771 |
| INSIG2   | 0.172197 | 0.16836  | -0.03251  | 0.314471 |

|          |          |          |          |          |
|----------|----------|----------|----------|----------|
| MGC16121 | 0.563887 | 0.549472 | -0.03736 | 0.621569 |
| KL       | 0.347669 | 0.347371 | -0.00124 | 0.876029 |
| SRD5A2   | 0.254545 | 0.289678 | 0.186529 | 0.026172 |
| GIMAP5   | 0.19555  | 0.201342 | 0.042112 | 0.644777 |
| KLHDC8A  | 0.558711 | 0.564658 | 0.015274 | 0.3034   |
| IL15     | 0.135368 | 0.132022 | -0.03611 | 0.251964 |
| GAGE12G  | 0.23598  | 0.256062 | 0.117828 | 0.09782  |
| SCML1    | 0.173908 | 0.186047 | 0.097344 | 0.251965 |
| C16orf11 | 0.53104  | 0.527419 | -0.00987 | 0.597113 |
| HVCN1    | 0.29927  | 0.286735 | -0.06173 | 0.041379 |
| PDE6H    | 0.639146 | 0.633191 | -0.01351 | 0.613368 |
| MIR146B  | 0.514935 | 0.500912 | -0.03983 | 0.308902 |
| CLN6     | 0.307067 | 0.312667 | 0.026074 | 0.411112 |
| ERAP2    | 0.69507  | 0.690008 | -0.01054 | 0.22597  |
| LEMD3    | 0.217564 | 0.226218 | 0.056274 | 0.172421 |
| FAM197Y2 | 0.667544 | 0.620108 | -0.10634 | 0.282045 |
| LCA5     | 0.167449 | 0.169747 | 0.019666 | 0.321238 |
| FXD4     | 0.528972 | 0.511334 | -0.04893 | 0.206107 |
| LOC28305 | 0.280593 | 0.276562 | -0.02087 | 0.357714 |
| PTPRF    | 0.540728 | 0.543822 | 0.008231 | 0.523478 |
| SNORD116 | 0.592102 | 0.601301 | 0.022243 | 0.236869 |
| SNORD45  | 0.053065 | 0.050179 | -0.08067 | 0.998142 |
| PADI3    | 0.268475 | 0.253494 | -0.08284 | 0.343297 |
| MIR550.2 | 0.443214 | 0.434884 | -0.02738 | 0.411113 |
| PMP2     | 0.711279 | 0.72802  | 0.033561 | 0.50248  |
| C3orf71  | 0.048316 | 0.046826 | -0.0452  | 0.148181 |
| DLAT     | 0.09784  | 0.094989 | -0.04267 | 0.408465 |
| GBP1     | 0.135712 | 0.142971 | 0.075181 | 0.416434 |
| CEP97    | 0.1116   | 0.117754 | 0.077442 | 0.025551 |
| MFI2     | 0.441042 | 0.434442 | -0.02175 | 0.427197 |
| LOC10013 | 0.44221  | 0.437971 | -0.0139  | 0.839469 |
| IL1R1    | 0.400843 | 0.409026 | 0.029155 | 0.774574 |
| MORF4    | 0.219425 | 0.219568 | 0.000936 | 0.728639 |
| MIR19A   | 0.156384 | 0.131397 | -0.25116 | 0.017884 |
| OR1Q1    | 0.578505 | 0.599897 | 0.052385 | 0.385118 |
| TACR1    | 0.277853 | 0.278023 | 0.000881 | 0.812268 |
| EGR3     | 0.163134 | 0.149841 | -0.12262 | 0.047536 |
| TMEM87A  | 0.195542 | 0.185898 | -0.07297 | 0.025245 |
| MGAT4A   | 0.125106 | 0.120452 | -0.05469 | 0.212015 |
| GTF3A    | 0.128763 | 0.131743 | 0.033014 | 0.196257 |
| BPTF     | 0.409026 | 0.418507 | 0.03306  | 0.251002 |
| MCM3     | 0.190085 | 0.187471 | -0.01998 | 0.735647 |
| CCDC151  | 0.142754 | 0.141832 | -0.00935 | 0.676832 |
| FANCC    | 0.49024  | 0.488409 | -0.0054  | 0.573102 |
| AIG1     | 0.316102 | 0.318321 | 0.010095 | 0.668337 |
| OR11G2   | 0.260318 | 0.271126 | 0.058688 | 0.490687 |
| NFE2L2   | 0.198885 | 0.197665 | -0.00888 | 0.992569 |
| PIWIL1   | 0.412607 | 0.407306 | -0.01865 | 0.68195  |
| CEACAM6  | 0.131754 | 0.131088 | -0.00731 | 0.593888 |
| ANP32B   | 0.098168 | 0.120462 | 0.295249 | 0.04806  |
| ANKRD26  | 0.116991 | 0.11769  | 0.008599 | 0.565206 |
| GATA5    | 0.179655 | 0.180666 | 0.008094 | 0.964713 |
| MRPS16   | 0.082228 | 0.085551 | 0.057147 | 0.124919 |
| DEFB136  | 0.610869 | 0.619471 | 0.020174 | 0.492152 |
| ALG14    | 0.152691 | 0.153939 | 0.011748 | 0.267716 |
| FRAS1    | 0.347692 | 0.360608 | 0.052622 | 0.521964 |

|          |          |          |          |          |
|----------|----------|----------|----------|----------|
| GAR1     | 0.097871 | 0.098978 | 0.016222 | 0.844932 |
| SELV     | 0.1887   | 0.192676 | 0.030081 | 0.56836  |
| ABCC5    | 0.478598 | 0.479812 | 0.003657 | 0.823123 |
| IFT20    | 0.363021 | 0.364459 | 0.005702 | 0.608471 |
| FILIP1   | 0.431758 | 0.447614 | 0.052031 | 0.127229 |
| MDC1     | 0.240757 | 0.241321 | 0.003373 | 0.824935 |
| RSL24D1  | 0.165012 | 0.169282 | 0.036858 | 0.403208 |
| MEIS3P1  | 0.402234 | 0.413512 | 0.039893 | 0.416435 |
| PKD1L1   | 0.401586 | 0.395808 | -0.02091 | 0.262724 |
| VMO1     | 0.128829 | 0.102936 | -0.32371 | 0.037805 |
| C1orf156 | 0.194432 | 0.193269 | -0.00865 | 0.702562 |
| OLFML3   | 0.411111 | 0.406013 | -0.018   | 0.526516 |
| CES7     | 0.687401 | 0.67302  | -0.0305  | 0.082383 |
| ARHGAP20 | 0.14845  | 0.15216  | 0.035611 | 0.290459 |
| LOC90586 | 0.327211 | 0.336766 | 0.041526 | 0.582655 |
| WWOX     | 0.523139 | 0.516815 | -0.01755 | 0.258774 |
| CALM1    | 0.190411 | 0.189616 | -0.00603 | 0.859538 |
| HOXA3    | 0.234851 | 0.244261 | 0.056677 | 0.814075 |
| SOHLH1   | 0.528439 | 0.562139 | 0.089189 | 0.237795 |
| MBLAC2   | 0.141848 | 0.142881 | 0.010469 | 0.490684 |
| TDGF3    | 0.525831 | 0.515198 | -0.02947 | 0.676833 |
| LARP1B   | 0.220398 | 0.218686 | -0.01125 | 0.481939 |
| OR52E4   | 0.273105 | 0.287202 | 0.07261  | 0.435377 |
| STMN3    | 0.255284 | 0.264879 | 0.05323  | 0.076019 |
| ALDH1A2  | 0.212107 | 0.193826 | -0.13003 | 0.014305 |
| PORCN    | 0.249635 | 0.260696 | 0.06255  | 0.585854 |
| SNORD114 | 0.886916 | 0.908754 | 0.035094 | 0.344401 |
| TFF1     | 0.59805  | 0.595618 | -0.00588 | 0.695665 |
| OR14C36  | 0.214488 | 0.208468 | -0.04107 | 0.707752 |
| DNM2     | 0.143999 | 0.128993 | -0.15877 | 0.034896 |
| PCYT2    | 0.296444 | 0.297606 | 0.005646 | 0.872359 |
| MYD88    | 0.274699 | 0.257861 | -0.09126 | 0.243394 |
| LSP1     | 0.560588 | 0.5508   | -0.02541 | 0.354071 |
| USP32    | 0.144172 | 0.146109 | 0.019261 | 0.268722 |
| TTC9     | 0.193283 | 0.196871 | 0.02654  | 0.503966 |
| COX6B1   | 0.122735 | 0.122662 | -0.00085 | 0.912856 |
| HSP90AB4 | 0.940963 | 0.94501  | 0.006191 | 0.614804 |
| CASP7    | 0.276921 | 0.279353 | 0.012616 | 0.537211 |
| CLDN15   | 0.449508 | 0.47539  | 0.080765 | 0.054444 |
| CIB4     | 0.550397 | 0.533648 | -0.04458 | 0.040004 |
| RUFY3    | 0.268499 | 0.266867 | -0.00879 | 0.72689  |
| PRAMEF11 | 0.266177 | 0.261306 | -0.02665 | 0.80325  |
| PDE5A    | 0.327734 | 0.332075 | 0.018985 | 0.262723 |
| WWC1     | 0.391925 | 0.382678 | -0.03445 | 0.070421 |
| CCDC28B  | 0.259456 | 0.262729 | 0.018082 | 0.302309 |
| HERPUD1  | 0.215663 | 0.22324  | 0.049814 | 0.143034 |
| RAD51AP1 | 0.096713 | 0.099741 | 0.04449  | 0.30669  |
| TP53BP2  | 0.24063  | 0.242396 | 0.010551 | 0.579465 |
| ARRB1    | 0.558504 | 0.551457 | -0.01832 | 0.283084 |
| C7orf50  | 0.531936 | 0.526727 | -0.0142  | 0.232285 |
| PSME4    | 0.115712 | 0.11398  | -0.02176 | 0.988853 |
| ARL5B    | 0.137049 | 0.143235 | 0.063691 | 0.111762 |
| CEACAM1  | 0.340126 | 0.40462  | 0.250495 | 0.003323 |
| CPSF4    | 0.219358 | 0.218792 | -0.00373 | 0.67343  |
| ZNF547   | 0.097681 | 0.1011   | 0.049623 | 0.163799 |
| RPRD1B   | 0.272002 | 0.273289 | 0.006806 | 0.901785 |

|           |          |          |          |          |
|-----------|----------|----------|----------|----------|
| LOC154441 | 0.586046 | 0.562412 | -0.05939 | 0.143671 |
| RINL      | 0.355848 | 0.35189  | -0.01614 | 0.351659 |
| NID2      | 0.243799 | 0.235486 | -0.05005 | 0.193852 |
| AMOT      | 0.36745  | 0.363256 | -0.01656 | 0.839468 |
| FCER1G    | 0.68279  | 0.679329 | -0.00733 | 0.899941 |
| GRINA     | 0.42259  | 0.416864 | -0.01968 | 0.415098 |
| CYB5R4    | 0.229982 | 0.2337   | 0.023137 | 0.474714 |
| CDCA2     | 0.255085 | 0.252531 | -0.01451 | 0.725142 |
| PELI3     | 0.31302  | 0.305759 | -0.03386 | 0.118195 |
| IDO1      | 0.737123 | 0.692565 | -0.08996 | 0.005166 |
| LOC14882  | 0.187434 | 0.219349 | 0.226846 | 0.14819  |
| ABI1      | 0.205785 | 0.212384 | 0.045535 | 0.234114 |
| DIRAS2    | 0.465918 | 0.461351 | -0.01421 | 0.52956  |
| ERCC1     | 0.14464  | 0.148888 | 0.041765 | 0.09139  |
| C7orf34   | 0.686165 | 0.676058 | -0.02141 | 0.108135 |
| PREX1     | 0.428165 | 0.422772 | -0.01829 | 0.499519 |
| CXorf15   | 0.274108 | 0.274728 | 0.003259 | 0.723396 |
| ZNF174    | 0.10335  | 0.102066 | -0.01803 | 0.554237 |
| KLHDC10   | 0.128961 | 0.125446 | -0.03987 | 0.225082 |
| RAB17     | 0.545455 | 0.521324 | -0.06528 | 0.02778  |
| CYB5D1    | 0.15424  | 0.159809 | 0.051176 | 0.059291 |
| LOC49414  | 0.27081  | 0.285922 | 0.078344 | 0.376262 |
| SNTN      | 0.212415 | 0.209242 | -0.02172 | 0.476154 |
| AP1G1     | 0.185969 | 0.190269 | 0.032977 | 0.380042 |
| WDR1      | 0.552319 | 0.547646 | -0.01226 | 0.651473 |
| IFT52     | 0.046779 | 0.044657 | -0.06698 | 0.252924 |
| ZBTB8A    | 0.340099 | 0.329806 | -0.04433 | 0.096412 |
| MMRN2     | 0.660946 | 0.670452 | 0.020601 | 0.133739 |
| PRDXDD1F  | 0.143216 | 0.147443 | 0.04196  | 0.140505 |
| TTC9B     | 0.151513 | 0.157061 | 0.051882 | 0.131939 |
| PGM1      | 0.392265 | 0.396621 | 0.015933 | 0.31784  |
| LONP1     | 0.679006 | 0.673006 | -0.0128  | 0.321236 |
| TFCP2L1   | 0.455751 | 0.445392 | -0.03317 | 0.212014 |
| RNASE12   | 0.251015 | 0.219533 | -0.19334 | 0.058978 |
| MACROD2   | 0.299475 | 0.305471 | 0.028597 | 0.15082  |
| EFEMP1    | 0.318874 | 0.328366 | 0.042318 | 0.476155 |
| NR4A1     | 0.362628 | 0.355908 | -0.02698 | 0.182904 |
| CCPG1     | 0.110976 | 0.112464 | 0.019206 | 0.463279 |
| B9D1      | 0.104623 | 0.108079 | 0.046881 | 0.097819 |
| C19orf42  | 0.154931 | 0.156848 | 0.01774  | 0.629816 |
| SPAM1     | 0.176305 | 0.187099 | 0.08573  | 0.026329 |
| CGNL1     | 0.518882 | 0.511294 | -0.02125 | 0.12492  |
| ERBB2     | 0.386849 | 0.384239 | -0.00977 | 0.628163 |
| SPRED2    | 0.44262  | 0.429012 | -0.04505 | 0.077181 |
| SSPO      | 0.55052  | 0.513245 | -0.10115 | 0.04806  |
| LRRN3     | 0.535088 | 0.563748 | 0.075276 | 0.035502 |
| EGFL8     | 0.720294 | 0.730398 | 0.020097 | 0.084879 |
| SPRY2     | 0.198982 | 0.199335 | 0.002554 | 0.574694 |
| FLJ42627  | 0.502475 | 0.449553 | -0.16056 | 0.018339 |
| DFNA5     | 0.36761  | 0.368624 | 0.003974 | 0.964713 |
| RAB21     | 0.109257 | 0.115399 | 0.078896 | 0.016471 |
| RRN3      | 0.116073 | 0.120608 | 0.055294 | 0.399287 |
| PIGM      | 0.039874 | 0.040436 | 0.020195 | 0.225068 |
| FAM65B    | 0.411609 | 0.394928 | -0.05969 | 0.01811  |
| LYPD6B    | 0.218505 | 0.215419 | -0.02052 | 0.311121 |
| MOV10     | 0.266552 | 0.272138 | 0.029922 | 0.252931 |

|           |          |          |          |          |
|-----------|----------|----------|----------|----------|
| CTR9      | 0.106535 | 0.1099   | 0.044866 | 0.177606 |
| BCAS2     | 0.169182 | 0.165771 | -0.02939 | 0.251003 |
| RMND5B    | 0.169985 | 0.169135 | -0.00724 | 0.680242 |
| MIR363    | 0.755262 | 0.786963 | 0.05932  | 0.592273 |
| TDRG1     | 0.759524 | 0.752653 | -0.01311 | 0.291515 |
| SNORD11f  | 0.492143 | 0.497474 | 0.015544 | 0.413768 |
| C16orf52  | 0.292787 | 0.308449 | 0.075182 | 0.065506 |
| GAS2L2    | 0.38589  | 0.366747 | -0.0734  | 0.026805 |
| RAB5A     | 0.248249 | 0.25442  | 0.035424 | 0.498041 |
| SPATA16   | 0.442486 | 0.5034   | 0.186072 | 0.053573 |
| PIK3R3    | 0.143929 | 0.145475 | 0.015423 | 0.282044 |
| SNORD11c  | 0.855189 | 0.875888 | 0.034503 | 0.449193 |
| TIFA      | 0.16365  | 0.164527 | 0.007712 | 0.576281 |
| C2CD3     | 0.304042 | 0.305748 | 0.008073 | 0.592277 |
| CKM       | 0.190135 | 0.185693 | -0.0341  | 0.832195 |
| TAF9B     | 0.175763 | 0.187034 | 0.089664 | 0.19226  |
| HS3ST4    | 0.294061 | 0.259041 | -0.18294 | 4.21E-05 |
| DUSP21    | 0.784191 | 0.800028 | 0.028846 | 0.905472 |
| SLC13A3   | 0.287715 | 0.276479 | -0.05747 | 0.066189 |
| TXNRD1    | 0.26145  | 0.257232 | -0.02346 | 0.304496 |
| SNX12     | 0.143029 | 0.159968 | 0.161478 | 0.401898 |
| HSPA4L    | 0.207144 | 0.210291 | 0.021755 | 0.436748 |
| NPVF      | 0.816873 | 0.820944 | 0.007172 | 0.962857 |
| WBSCR16   | 0.228791 | 0.227558 | -0.00779 | 0.859539 |
| MTSS1L    | 0.54217  | 0.539093 | -0.00821 | 0.531083 |
| RELT      | 0.400136 | 0.39628  | -0.01397 | 0.616643 |
| LCORL     | 0.195881 | 0.20048  | 0.033483 | 0.41777  |
| CER1      | 0.389235 | 0.391641 | 0.008888 | 0.946164 |
| ABCC6     | 0.690495 | 0.67547  | -0.03174 | 0.454803 |
| ANKRD36E  | 0.146373 | 0.143367 | -0.02994 | 0.483392 |
| RFPL2     | 0.177034 | 0.170695 | -0.05261 | 0.083211 |
| CDH4      | 0.649373 | 0.642828 | -0.01462 | 0.126068 |
| TUFT1     | 0.392891 | 0.3883   | -0.01696 | 0.336227 |
| FOXL1     | 0.335579 | 0.337941 | 0.010116 | 0.610103 |
| GPI       | 0.173667 | 0.172095 | -0.01312 | 0.794258 |
| AFMID     | 0.297522 | 0.304164 | 0.031851 | 0.139883 |
| PYCR1     | 0.332865 | 0.32246  | -0.04582 | 0.054738 |
| COX7B     | 0.193491 | 0.207626 | 0.101721 | 0.50993  |
| CCDC49    | 0.203719 | 0.20719  | 0.024377 | 0.387671 |
| AKIRIN1   | 0.156413 | 0.160151 | 0.034078 | 0.387672 |
| ACTL7B    | 0.748383 | 0.74802  | -0.0007  | 0.279961 |
| SFT2D2    | 0.124347 | 0.124996 | 0.007509 | 0.532613 |
| ABCC2     | 0.364893 | 0.396263 | 0.118985 | 0.031623 |
| C20orf151 | 0.588308 | 0.608569 | 0.048851 | 0.300128 |
| DDX60L    | 0.182967 | 0.190201 | 0.055945 | 0.3374   |
| COL4A3BP  | 0.129026 | 0.131226 | 0.024391 | 0.198685 |
| PIK3R6    | 0.247998 | 0.232421 | -0.09359 | 0.308904 |
| SPRR2G    | 0.209939 | 0.19834  | -0.082   | 0.173155 |
| LOC34884f | 0.17514  | 0.170078 | -0.04231 | 0.310012 |
| LOC22171f | 0.077993 | 0.079841 | 0.033779 | 0.261732 |
| ATP2C1    | 0.220523 | 0.222541 | 0.013146 | 0.523477 |
| DLX3      | 0.110522 | 0.106391 | -0.05497 | 0.435374 |
| EFCAB10   | 0.258075 | 0.253182 | -0.02761 | 0.165924 |
| IGFBP7    | 0.357995 | 0.353476 | -0.01833 | 0.242455 |
| TOMM5     | 0.148663 | 0.138778 | -0.09927 | 0.138019 |
| SLC25A12  | 0.307964 | 0.312707 | 0.02205  | 0.349257 |

|          |          |          |          |          |
|----------|----------|----------|----------|----------|
| TOMM22   | 0.163739 | 0.165874 | 0.01869  | 0.466123 |
| SLC7A5P1 | 0.240981 | 0.229498 | -0.07043 | 0.170962 |
| FCGR1C   | 0.406341 | 0.382187 | -0.08841 | 0.164507 |
| TLK1     | 0.247509 | 0.249503 | 0.011577 | 0.541828 |
| C15orf54 | 0.762852 | 0.736384 | -0.05094 | 0.112816 |
| PSMA8    | 0.70002  | 0.71128  | 0.023022 | 0.234109 |
| ABLIM1   | 0.477787 | 0.466105 | -0.03571 | 0.303395 |
| C10orf78 | 0.08927  | 0.09368  | 0.069554 | 0.09829  |
| DUSP5    | 0.266421 | 0.267193 | 0.004174 | 0.481939 |
| BCO2     | 0.155566 | 0.144938 | -0.10209 | 0.03759  |
| CXorf36  | 0.447027 | 0.463163 | 0.051158 | 0.355285 |
| CAPN7    | 0.724038 | 0.74478  | 0.040749 | 0.84493  |
| RXRB     | 0.573352 | 0.581884 | 0.021311 | 0.303397 |
| CORO2A   | 0.380652 | 0.376216 | -0.01691 | 0.666643 |
| RFC4     | 0.124273 | 0.128077 | 0.043494 | 0.202785 |
| CTNNA1   | 0.327747 | 0.325312 | -0.01076 | 0.646449 |
| CRYGA    | 0.844931 | 0.857181 | 0.020767 | 0.087    |
| TMEM92   | 0.307992 | 0.291293 | -0.08042 | 0.077571 |
| DAOA     | 0.604893 | 0.621835 | 0.039852 | 0.442256 |
| KRT39    | 0.450735 | 0.460355 | 0.030468 | 0.659883 |
| KIAA0182 | 0.487397 | 0.480941 | -0.01924 | 0.399289 |
| AMFR     | 0.425506 | 0.426647 | 0.003863 | 0.901785 |
| CTNNBL1  | 0.118523 | 0.114104 | -0.05481 | 0.131342 |
| VSIG8    | 0.441291 | 0.442993 | 0.005555 | 0.810463 |
| WARS2    | 0.319101 | 0.33077  | 0.051817 | 0.067228 |
| RACGAP1F | 0.408059 | 0.412837 | 0.016798 | 0.397986 |
| CITED4   | 0.115843 | 0.115773 | -0.00087 | 0.716429 |
| NME2     | 0.279116 | 0.272632 | -0.03391 | 0.343296 |
| C11orf40 | 0.208082 | 0.211046 | 0.020404 | 0.785294 |
| EPHA1    | 0.488454 | 0.483361 | -0.01512 | 0.837649 |
| NUBP1    | 0.264385 | 0.256704 | -0.04253 | 0.20114  |
| ATIC     | 0.093455 | 0.097801 | 0.065572 | 0.162393 |
| GDF15    | 0.316829 | 0.311797 | -0.0231  | 0.388949 |
| GPR179   | 0.626374 | 0.616332 | -0.02332 | 0.552679 |
| SNORA27  | 0.645053 | 0.662145 | 0.037729 | 0.238718 |
| OSTM1    | 0.149109 | 0.150025 | 0.00883  | 0.538748 |
| ACVR1B   | 0.373882 | 0.367877 | -0.02336 | 0.376262 |
| C1orf133 | 0.122458 | 0.118219 | -0.05083 | 0.14495  |
| PEX11B   | 0.040145 | 0.040732 | 0.020931 | 0.457611 |
| TMEM132I | 0.428121 | 0.409503 | -0.06414 | 0.058978 |
| TAC4     | 0.38097  | 0.388627 | 0.028711 | 0.42449  |
| SLC22A23 | 0.556022 | 0.520496 | -0.09525 | 0.002567 |
| ZNF804B  | 0.273588 | 0.29357  | 0.1017   | 0.171691 |
| GAMT     | 0.289761 | 0.283389 | -0.03208 | 0.36015  |
| PFN1     | 0.171382 | 0.169537 | -0.01562 | 0.872359 |
| SNPH     | 0.39687  | 0.384465 | -0.04581 | 0.375007 |
| PDCD4    | 0.220731 | 0.214838 | -0.03905 | 0.281006 |
| COX8A    | 0.104533 | 0.102427 | -0.02937 | 0.50993  |
| RPF2     | 0.105138 | 0.1067   | 0.021269 | 0.466122 |
| MAGEL2   | 0.324668 | 0.327784 | 0.01378  | 0.779928 |
| SKI      | 0.561959 | 0.56432  | 0.00605  | 0.633127 |
| C5orf13  | 0.317094 | 0.319678 | 0.011711 | 0.711218 |
| VPS41    | 0.402211 | 0.409644 | 0.026418 | 0.337401 |
| PIGF     | 0.155282 | 0.153013 | -0.02124 | 0.776358 |
| GSC2     | 0.059803 | 0.061148 | 0.032098 | 0.563627 |
| TPRXL    | 0.506573 | 0.527131 | 0.057393 | 0.123214 |

|           |          |          |          |          |
|-----------|----------|----------|----------|----------|
| SRA1      | 0.137521 | 0.140587 | 0.03181  | 0.190676 |
| SIGLEC5   | 0.118628 | 0.106469 | -0.15601 | 0.048589 |
| KTELC1    | 0.142277 | 0.142682 | 0.004109 | 0.680241 |
| KIAA1199  | 0.572775 | 0.563204 | -0.02431 | 0.011991 |
| SLC6A18   | 0.376787 | 0.429999 | 0.190587 | 0.025245 |
| HMCN1     | 0.189502 | 0.199231 | 0.07223  | 0.371259 |
| LRRC4C    | 0.325404 | 0.316181 | -0.04148 | 0.10214  |
| LRRC47    | 0.451166 | 0.44945  | -0.0055  | 0.735644 |
| SIGLEC16  | 0.356656 | 0.348718 | -0.03247 | 0.409788 |
| FAM43B    | 0.149433 | 0.150587 | 0.011102 | 0.756803 |
| SLC25A10  | 0.554456 | 0.549969 | -0.01172 | 0.370014 |
| GAPVD1    | 0.109738 | 0.1138   | 0.052439 | 0.131938 |
| SLCO5A1   | 0.267613 | 0.282205 | 0.076593 | 0.030892 |
| MYCT1     | 0.63073  | 0.673561 | 0.094787 | 0.193853 |
| PPP5C     | 0.10658  | 0.105349 | -0.01675 | 0.94431  |
| BMS1P5    | 0.035243 | 0.036112 | 0.035152 | 0.369991 |
| KCNQ3     | 0.318142 | 0.325262 | 0.031931 | 0.453399 |
| CT47A8    | 0.357024 | 0.34249  | -0.05996 | 0.498042 |
| PRKRA     | 0.160713 | 0.165348 | 0.041017 | 0.034696 |
| P2RX2     | 0.244025 | 0.255054 | 0.063772 | 0.260745 |
| NOLC1     | 0.215406 | 0.217394 | 0.013253 | 0.702562 |
| PRSS23    | 0.367042 | 0.371399 | 0.017027 | 0.432641 |
| SULT2A1   | 0.256034 | 0.283935 | 0.149224 | 0.074872 |
| GAS5      | 0.117412 | 0.106892 | -0.13543 | 0.075634 |
| KIAA2022  | 0.305868 | 0.319571 | 0.063228 | 0.265712 |
| HEPACAM   | 0.383869 | 0.367171 | -0.06416 | 0.242454 |
| ZNF146    | 0.387924 | 0.388331 | 0.001513 | 0.732139 |
| FAM66D    | 0.581955 | 0.566321 | -0.03929 | 0.022913 |
| SYCE2     | 0.173575 | 0.179582 | 0.049083 | 0.876029 |
| GLUD1     | 0.129276 | 0.132176 | 0.032005 | 0.189102 |
| VTCN1     | 0.543798 | 0.560091 | 0.042592 | 0.110197 |
| RIMKLA    | 0.253301 | 0.250899 | -0.01375 | 0.286232 |
| C13orf16  | 0.420562 | 0.455204 | 0.114194 | 0.085727 |
| GADD45G   | 0.168665 | 0.15811  | -0.09324 | 0.123782 |
| BRI3      | 0.202956 | 0.207298 | 0.030544 | 0.363831 |
| SELK      | 0.117814 | 0.120715 | 0.035096 | 0.126649 |
| SLCO2B1   | 0.641119 | 0.619157 | -0.05029 | 0.011525 |
| STAU1     | 0.167539 | 0.167056 | -0.00417 | 0.859539 |
| R3HCC1    | 0.330353 | 0.316909 | -0.05994 | 0.023621 |
| KRAS      | 0.145572 | 0.148848 | 0.032105 | 0.092738 |
| MIR412    | 0.857523 | 0.846049 | -0.01943 | 0.131928 |
| FARSA     | 0.287724 | 0.292391 | 0.023209 | 0.413769 |
| UGT8      | 0.162516 | 0.171918 | 0.081135 | 0.18989  |
| SOAT1     | 0.194944 | 0.197188 | 0.016515 | 0.326954 |
| CLEC7A    | 0.32926  | 0.308566 | -0.09365 | 0.262725 |
| LOC100131 | 0.338284 | 0.356907 | 0.077312 | 0.307798 |
| IL21      | 0.383242 | 0.419637 | 0.130886 | 0.091837 |
| ABHD3     | 0.143773 | 0.146111 | 0.023278 | 0.781716 |
| RHOH      | 0.740179 | 0.785131 | 0.085059 | 0.012557 |
| CD44      | 0.386345 | 0.393726 | 0.027305 | 0.213726 |
| FGFRL1    | 0.207074 | 0.222325 | 0.102529 | 0.141767 |
| INHBB     | 0.392663 | 0.368115 | -0.09313 | 0.122085 |
| TRMT2B    | 0.149405 | 0.160075 | 0.09952  | 0.700835 |
| SUPT3H    | 0.301621 | 0.321846 | 0.093635 | 0.02142  |
| C1QTNF1   | 0.356462 | 0.330022 | -0.11119 | 0.001851 |
| DVL1      | 0.709551 | 0.701585 | -0.01629 | 0.285179 |

|          |          |          |          |          |
|----------|----------|----------|----------|----------|
| TRIML2   | 0.393004 | 0.406944 | 0.050289 | 0.289402 |
| ISPD     | 0.548349 | 0.557443 | 0.02373  | 0.278928 |
| PRKG2    | 0.301782 | 0.324627 | 0.105276 | 0.058664 |
| MED22    | 0.593764 | 0.587616 | -0.01501 | 0.43264  |
| FAM182B  | 0.87573  | 0.859384 | -0.02718 | 0.020897 |
| NAGA     | 0.096681 | 0.096845 | 0.00245  | 0.815881 |
| ZNF704   | 0.349628 | 0.348799 | -0.00343 | 0.473275 |
| HCFC1    | 0.583398 | 0.584308 | 0.002249 | 0.751495 |
| FAM171A1 | 0.507189 | 0.533605 | 0.073249 | 0.015553 |
| KCNT1    | 0.477085 | 0.507199 | 0.088304 | 0.18444  |
| GNMT     | 0.11695  | 0.122197 | 0.063316 | 0.06217  |
| ZAR1     | 0.511565 | 0.567608 | 0.149976 | 0.103616 |
| TMEM168  | 0.164079 | 0.164185 | 0.000938 | 0.887053 |
| ABCB11   | 0.724005 | 0.711703 | -0.02472 | 0.634784 |
| SPDYA    | 0.120195 | 0.112885 | -0.09052 | 0.076018 |
| SLC25A43 | 0.301807 | 0.301091 | -0.00343 | 0.832195 |
| DDIT4    | 0.093838 | 0.093263 | -0.00886 | 0.887053 |
| ACTA1    | 0.307935 | 0.322819 | 0.068098 | 0.639774 |
| LIPT2    | 0.048753 | 0.048431 | -0.00954 | 0.826744 |
| MIR517B  | 0.158175 | 0.154631 | -0.03269 | 0.397988 |
| FGF6     | 0.359512 | 0.363321 | 0.015204 | 0.909164 |
| LOC55313 | 0.144511 | 0.130263 | -0.14975 | 0.116023 |
| PLEK2    | 0.217874 | 0.228404 | 0.068097 | 0.143035 |
| EXOC1    | 0.047663 | 0.045731 | -0.0597  | 0.470395 |
| AP2M1    | 0.403298 | 0.409362 | 0.02153  | 0.260744 |
| SCUBE3   | 0.377083 | 0.378075 | 0.003791 | 0.401897 |
| GLIS2    | 0.717807 | 0.718089 | 0.000566 | 0.601966 |
| FAM110A  | 0.225588 | 0.219985 | -0.03629 | 0.15483  |
| FURIN    | 0.588903 | 0.579211 | -0.02394 | 0.133137 |
| GP2      | 0.39145  | 0.40295  | 0.04177  | 0.67343  |
| RBM33    | 0.404018 | 0.405564 | 0.005511 | 0.756803 |
| S100A7L2 | 0.440653 | 0.41048  | -0.10233 | 0.179108 |
| DRD5     | 0.281155 | 0.255836 | -0.13614 | 0.670033 |
| LOC33924 | 0.424568 | 0.40943  | -0.05238 | 0.18832  |
| HOXD4    | 0.711512 | 0.625334 | -0.18626 | 0.04939  |
| C20orf11 | 0.150238 | 0.151022 | 0.00751  | 0.874194 |
| FLG2     | 0.077204 | 0.07373  | -0.06642 | 0.186761 |
| FAM189A1 | 0.426694 | 0.413929 | -0.04382 | 0.04303  |
| RNASET2  | 0.134663 | 0.135289 | 0.006694 | 0.898099 |
| ZMYM4    | 0.301708 | 0.304207 | 0.0119   | 0.535676 |
| STIM1    | 0.36736  | 0.362202 | -0.0204  | 0.358932 |
| VPS37D   | 0.172065 | 0.173763 | 0.01417  | 0.585853 |
| LOC15837 | 0.659352 | 0.661758 | 0.005257 | 0.763894 |
| FAM27L   | 0.195434 | 0.193764 | -0.01238 | 0.753264 |
| NCBP1    | 0.331701 | 0.340254 | 0.036729 | 0.948018 |
| CST7     | 0.341986 | 0.336944 | -0.02143 | 0.579464 |
| NKAP     | 0.219272 | 0.240781 | 0.135003 | 0.025705 |
| NPBWR1   | 0.075474 | 0.078587 | 0.058325 | 0.375005 |
| LOC10024 | 0.351175 | 0.36551  | 0.057718 | 0.134346 |
| LOC10012 | 0.332875 | 0.362335 | 0.122343 | 0.063156 |
| GPR62    | 0.401329 | 0.397931 | -0.01227 | 0.61337  |
| EPN2     | 0.402238 | 0.403796 | 0.005577 | 0.517434 |
| HMGXB4   | 0.188394 | 0.193031 | 0.035082 | 0.237795 |
| NAPA     | 0.211786 | 0.213403 | 0.010979 | 0.618282 |
| GAST     | 0.525692 | 0.521686 | -0.01103 | 0.521965 |
| RPS3A    | 0.297483 | 0.298774 | 0.006251 | 0.968425 |

|          |          |          |          |          |
|----------|----------|----------|----------|----------|
| YSK4     | 0.434071 | 0.447753 | 0.044772 | 0.027127 |
| TWSG1    | 0.160619 | 0.164312 | 0.032793 | 0.348058 |
| SP100    | 0.488475 | 0.466112 | -0.06761 | 0.281005 |
| MS4A14   | 0.316932 | 0.335647 | 0.08277  | 0.305594 |
| SEC61A1  | 0.214042 | 0.211279 | -0.01874 | 0.949872 |
| CTXN2    | 0.29098  | 0.283795 | -0.03607 | 0.214586 |
| DOCK5    | 0.397281 | 0.379278 | -0.0669  | 0.022913 |
| RPS4Y1   | 0.338545 | 0.334401 | -0.01777 | 0.935048 |
| INMT     | 0.617655 | 0.611844 | -0.01364 | 0.571522 |
| ECSIT    | 0.102945 | 0.107188 | 0.058265 | 0.098289 |
| CCDC60   | 0.360026 | 0.356111 | -0.01577 | 0.646449 |
| CCL4     | 0.320059 | 0.29558  | -0.11479 | 0.300132 |
| SLC24A4  | 0.173651 | 0.175905 | 0.018603 | 0.746202 |
| LAIR2    | 0.266622 | 0.271115 | 0.024106 | 0.817692 |
| DDO      | 0.42442  | 0.448893 | 0.080879 | 0.00726  |
| QARS     | 0.180401 | 0.1751   | -0.04303 | 0.071879 |
| HOXC11   | 0.110118 | 0.101284 | -0.12065 | 0.120963 |
| CD80     | 0.419469 | 0.412051 | -0.02574 | 0.34806  |
| KIR3DP1  | 0.32411  | 0.324452 | 0.001522 | 0.916551 |
| LOC73010 | 0.177273 | 0.17554  | -0.01418 | 0.832195 |
| STK11IP  | 0.095032 | 0.09558  | 0.008295 | 0.814074 |
| HSBP1L1  | 0.120355 | 0.120386 | 0.000378 | 0.854055 |
| GPR137B  | 0.224493 | 0.236495 | 0.075135 | 0.239651 |
| IGFN1    | 0.650784 | 0.624891 | -0.05857 | 0.009554 |
| ARHGAP22 | 0.404362 | 0.39957  | -0.0172  | 0.139883 |
| TOMM6    | 0.14706  | 0.142703 | -0.04339 | 0.19465  |
| ABCA3    | 0.753136 | 0.748636 | -0.00865 | 0.368761 |
| GPC2     | 0.398663 | 0.427313 | 0.100123 | 0.084462 |
| OR10Z1   | 0.183778 | 0.17314  | -0.08603 | 0.293662 |
| C3orf22  | 0.523795 | 0.514031 | -0.02715 | 0.332729 |
| FAM78A   | 0.547473 | 0.540795 | -0.0177  | 0.569941 |
| ARMC4    | 0.193155 | 0.20529  | 0.08791  | 0.161    |
| TMEM87B  | 0.065764 | 0.067455 | 0.036616 | 0.668335 |
| PLA1A    | 0.528396 | 0.507083 | -0.0594  | 0.036534 |
| BCAR1    | 0.450961 | 0.450394 | -0.00182 | 0.903628 |
| ZIM2     | 0.516861 | 0.538313 | 0.058668 | 0.113344 |
| BACH1    | 0.177088 | 0.183003 | 0.047404 | 0.128394 |
| DCAF12L1 | 0.486147 | 0.49413  | 0.023496 | 0.541829 |
| OR10Q1   | 0.418132 | 0.452298 | 0.113314 | 0.121525 |
| PDIA3    | 0.174769 | 0.17786  | 0.025294 | 0.432641 |
| RAC3     | 0.406165 | 0.404864 | -0.00463 | 0.554238 |
| SLC36A3  | 0.466903 | 0.443677 | -0.07361 | 0.103615 |
| MAGEA12  | 0.729757 | 0.685376 | -0.09052 | 0.146883 |
| ATF5     | 0.807326 | 0.785313 | -0.03988 | 0.276866 |
| FER1L4   | 0.488499 | 0.493952 | 0.016013 | 0.45762  |
| CHRM3    | 0.662406 | 0.658314 | -0.00894 | 0.855881 |
| APLN     | 0.29007  | 0.296493 | 0.031599 | 0.687082 |
| GJC2     | 0.453468 | 0.459864 | 0.020205 | 0.733893 |
| RAB10    | 0.178401 | 0.178584 | 0.001478 | 0.520452 |
| KRT23    | 0.470628 | 0.463794 | -0.0211  | 0.506944 |
| H1FOO    | 0.710721 | 0.693942 | -0.03447 | 0.007621 |
| OR6A2    | 0.505396 | 0.535675 | 0.083943 | 0.523479 |
| ADAM29   | 0.324927 | 0.368857 | 0.182947 | 0.043031 |
| LHCGR    | 0.377252 | 0.35398  | -0.09186 | 0.283089 |
| SLC37A1  | 0.475713 | 0.473643 | -0.00629 | 0.445028 |
| DEFB106B | 0.499225 | 0.49381  | -0.01573 | 0.852229 |

|           |          |          |          |          |
|-----------|----------|----------|----------|----------|
| FBXO42    | 0.082392 | 0.083638 | 0.021657 | 0.489219 |
| EBF4      | 0.361392 | 0.370675 | 0.036591 | 0.185985 |
| LCE2B     | 0.25954  | 0.245309 | -0.08135 | 0.237796 |
| MUC7      | 0.353256 | 0.40816  | 0.208421 | 0.008927 |
| TAS2R13   | 0.382616 | 0.380936 | -0.00635 | 0.812269 |
| FAM53C    | 0.412798 | 0.409379 | -0.012   | 0.600349 |
| FXN       | 0.445409 | 0.441083 | -0.01408 | 0.571523 |
| SMYD1     | 0.630711 | 0.65275  | 0.049553 | 0.049121 |
| ZBTB33    | 0.251543 | 0.269602 | 0.100028 | 0.218046 |
| MIF4GD    | 0.118826 | 0.120867 | 0.024563 | 0.425841 |
| SS18L2    | 0.126008 | 0.130181 | 0.047008 | 0.056823 |
| TAF5L     | 0.735352 | 0.726011 | -0.01844 | 0.092283 |
| FERMT1    | 0.52974  | 0.541522 | 0.031735 | 0.659883 |
| LGALS8    | 0.336159 | 0.334344 | -0.00781 | 0.970282 |
| TMPRSS11  | 0.540195 | 0.597719 | 0.145989 | 0.138637 |
| GBF1      | 0.255866 | 0.251725 | -0.02354 | 0.257795 |
| IL6ST     | 0.163193 | 0.167192 | 0.034924 | 0.29259  |
| DOCK6     | 0.417287 | 0.422935 | 0.019398 | 0.883376 |
| LECT2     | 0.568591 | 0.579633 | 0.02775  | 0.358932 |
| C1orf128  | 0.136458 | 0.137027 | 0.006005 | 0.579464 |
| SH2B2     | 0.477144 | 0.487399 | 0.030679 | 0.127227 |
| FAM127C   | 0.162805 | 0.174626 | 0.101121 | 0.558927 |
| PDGFC     | 0.254521 | 0.276216 | 0.118008 | 0.111763 |
| PNMA1     | 0.221396 | 0.22194  | 0.003545 | 0.774573 |
| RAD52     | 0.547138 | 0.542362 | -0.01265 | 0.386391 |
| DDX42     | 0.235976 | 0.234699 | -0.00783 | 0.776357 |
| ANKRD43   | 0.211183 | 0.201726 | -0.06609 | 0.179109 |
| CHRD      | 0.486534 | 0.488114 | 0.004676 | 0.986996 |
| FLYWCH2   | 0.268813 | 0.265698 | -0.01682 | 0.354072 |
| SPINT4    | 0.166103 | 0.179116 | 0.108813 | 0.362603 |
| RAB40C    | 0.622865 | 0.618641 | -0.00982 | 0.316716 |
| FLJ32065  | 0.239146 | 0.241252 | 0.012644 | 0.769229 |
| RIT2      | 0.303842 | 0.292148 | -0.05662 | 0.193056 |
| C14orf104 | 0.153036 | 0.154822 | 0.016744 | 0.401896 |
| MRPL28    | 0.22869  | 0.220813 | -0.05057 | 0.509929 |
| NRG3      | 0.433314 | 0.440593 | 0.024036 | 0.310011 |
| YBX1      | 0.232935 | 0.234783 | 0.0114   | 0.740917 |
| NPR3      | 0.112075 | 0.11335  | 0.016314 | 0.817692 |
| HCFC1R1   | 0.162349 | 0.167284 | 0.043202 | 0.131939 |
| TMEM203   | 0.051555 | 0.050125 | -0.04058 | 0.643105 |
| C8orf84   | 0.303137 | 0.302364 | -0.00368 | 0.981423 |
| CTTNBP2   | 0.175687 | 0.17114  | -0.03783 | 0.735648 |
| CCDC53    | 0.107404 | 0.107445 | 0.00055  | 0.427195 |
| HAR1B     | 0.265475 | 0.278539 | 0.069303 | 0.443645 |
| GPR156    | 0.603779 | 0.611206 | 0.017638 | 0.29046  |
| XRCC3     | 0.674379 | 0.66799  | -0.01373 | 0.285181 |
| LMAN2L    | 0.227179 | 0.220741 | -0.04148 | 0.241517 |
| CLPB      | 0.308309 | 0.302261 | -0.02858 | 0.315593 |
| PPAPDC1A  | 0.29061  | 0.274938 | -0.07998 | 0.049661 |
| RLTPR     | 0.341742 | 0.348564 | 0.028518 | 0.543373 |
| RPL14     | 0.108786 | 0.100717 | -0.11119 | 0.177604 |
| SNORD94   | 0.680782 | 0.689443 | 0.018238 | 0.453397 |
| PPP1R16A  | 0.584055 | 0.570495 | -0.03389 | 0.499519 |
| ARSF      | 0.315094 | 0.303698 | -0.05314 | 0.174631 |
| ZNF276    | 0.485685 | 0.48286  | -0.00842 | 0.528035 |
| TBCEL     | 0.264098 | 0.274558 | 0.056036 | 0.060877 |

|          |          |          |          |          |
|----------|----------|----------|----------|----------|
| LOC28427 | 0.503779 | 0.525511 | 0.060931 | 0.653153 |
| PRR5     | 0.220941 | 0.206258 | -0.09921 | 0.006133 |
| CCDC120  | 0.748002 | 0.737488 | -0.02042 | 0.589058 |
| 6.Mar    | 0.119706 | 0.124268 | 0.05396  | 0.215445 |
| TNFAIP8  | 0.36715  | 0.37211  | 0.019359 | 0.690511 |
| OCLN     | 0.121487 | 0.123856 | 0.027856 | 0.76923  |
| NEUROD2  | 0.083633 | 0.076872 | -0.12162 | 0.196257 |
| PGD      | 0.168044 | 0.165998 | -0.01768 | 0.474714 |
| BLOC1S3  | 0.076606 | 0.075479 | -0.02138 | 0.481935 |
| ADAMTS1  | 0.506389 | 0.533366 | 0.07488  | 0.196258 |
| COL6A6   | 0.667643 | 0.65772  | -0.0216  | 0.104603 |
| CYP4X1   | 0.163377 | 0.165809 | 0.021319 | 0.779928 |
| MIR340   | 0.560392 | 0.565853 | 0.013992 | 0.796054 |
| RABGAP1L | 0.283672 | 0.284581 | 0.004618 | 0.678536 |
| POLL     | 0.279618 | 0.281677 | 0.010583 | 0.702563 |
| FERMT3   | 0.679556 | 0.668155 | -0.02441 | 0.166634 |
| INHBE    | 0.489049 | 0.450494 | -0.11847 | 0.007465 |
| KRT75    | 0.624427 | 0.578255 | -0.11083 | 0.033321 |
| PGP      | 0.075861 | 0.077663 | 0.033877 | 0.633124 |
| EPB41    | 0.274574 | 0.267393 | -0.03823 | 0.10865  |
| PER4     | 0.481536 | 0.492913 | 0.03369  | 0.382575 |
| IFITM5   | 0.312144 | 0.320943 | 0.040104 | 0.483392 |
| PTPN22   | 0.7491   | 0.7443   | -0.00927 | 0.671725 |
| EMILIN1  | 0.464352 | 0.441911 | -0.07146 | 0.057433 |
| SLC4A1   | 0.656453 | 0.607363 | -0.11213 | 0.008055 |
| SFRS15   | 0.134243 | 0.13269  | -0.01678 | 0.896255 |
| MCC      | 0.41518  | 0.413262 | -0.00668 | 0.688793 |
| SIRT6    | 0.294678 | 0.291219 | -0.01704 | 0.429914 |
| NCKAP5   | 0.475396 | 0.461482 | -0.04285 | 0.142398 |
| ACE2     | 0.67148  | 0.6926   | 0.044677 | 0.377516 |
| LOC10012 | 0.053632 | 0.053747 | 0.003103 | 0.742674 |
| RUNDC1   | 0.192902 | 0.198774 | 0.04326  | 0.227768 |
| CARD17   | 0.76219  | 0.784237 | 0.04114  | 0.119849 |
| FGFR1    | 0.364909 | 0.359787 | -0.0204  | 0.267717 |
| SYNGR4   | 0.42756  | 0.42278  | -0.01622 | 0.265712 |
| SPATA1   | 0.058213 | 0.057619 | -0.0148  | 0.636445 |
| DUSP6    | 0.160374 | 0.155336 | -0.04605 | 0.454805 |
| ITGAL    | 0.167346 | 0.173414 | 0.05138  | 0.834012 |
| RRAS     | 0.132708 | 0.129923 | -0.0306  | 0.571524 |
| TMEM116  | 0.218426 | 0.225655 | 0.046977 | 0.214586 |
| RCOR1    | 0.216204 | 0.224545 | 0.054618 | 0.102631 |
| SYN1     | 0.363772 | 0.368279 | 0.017765 | 0.521966 |
| MIR516A1 | 0.403294 | 0.446696 | 0.14746  | 0.033905 |
| MIR410   | 0.7447   | 0.726134 | -0.03642 | 0.028446 |
| EGR4     | 0.125562 | 0.119987 | -0.06552 | 0.063156 |
| C17orf48 | 0.154907 | 0.159669 | 0.043679 | 0.254867 |
| RNASEH2C | 0.053333 | 0.052224 | -0.03031 | 0.633123 |
| SLC9A2   | 0.141766 | 0.150411 | 0.085395 | 0.189103 |
| SCAND1   | 0.047632 | 0.048034 | 0.012129 | 0.435364 |
| FAM102B  | 0.384022 | 0.385506 | 0.005564 | 0.634787 |
| CTNND2   | 0.409461 | 0.407163 | -0.00812 | 0.526514 |
| OSGIN2   | 0.35692  | 0.361696 | 0.019176 | 0.973995 |
| LOC64129 | 0.051906 | 0.044799 | -0.21241 | 0.114938 |
| RGS5     | 0.550344 | 0.61709  | 0.165148 | 0.010929 |
| TMEM109  | 0.121494 | 0.123393 | 0.022378 | 0.207784 |
| TUBB2B   | 0.114239 | 0.113195 | -0.01324 | 0.496565 |

|           |          |          |          |          |
|-----------|----------|----------|----------|----------|
| ZFP92     | 0.576915 | 0.566035 | -0.02747 | 0.473275 |
| LOC100131 | 0.395743 | 0.432474 | 0.128051 | 0.138638 |
| MPP7      | 0.390831 | 0.386983 | -0.01427 | 0.935048 |
| BANP      | 0.710313 | 0.700667 | -0.01973 | 0.02064  |
| SALL4     | 0.326146 | 0.309691 | -0.07469 | 0.064827 |
| GPR89B    | 0.192596 | 0.202638 | 0.073333 | 0.036326 |
| MIR220B   | 0.669114 | 0.7005   | 0.066132 | 0.3281   |
| ATP4A     | 0.242697 | 0.244676 | 0.011716 | 0.951726 |
| MTNR1B    | 0.518421 | 0.508252 | -0.02858 | 0.392808 |
| RTL1      | 0.775653 | 0.757971 | -0.03327 | 0.173154 |
| NRN1      | 0.121718 | 0.119739 | -0.02365 | 0.383844 |
| IER3IP1   | 0.032148 | 0.032567 | 0.018658 | 0.371199 |
| ZNF384    | 0.178736 | 0.174846 | -0.03174 | 0.53721  |
| LIMS3.LOC | 0.265868 | 0.296435 | 0.157004 | 0.122649 |
| STAB2     | 0.432843 | 0.429671 | -0.01061 | 0.477596 |
| C14orf102 | 0.360443 | 0.357454 | -0.01202 | 0.483391 |
| FTL       | 0.250708 | 0.257805 | 0.040273 | 0.136173 |
| C12orf34  | 0.140005 | 0.132029 | -0.08463 | 0.164503 |
| PDRG1     | 0.160948 | 0.1549   | -0.05526 | 0.124921 |
| TTC5      | 0.101226 | 0.110681 | 0.128827 | 0.047536 |
| NEK4      | 0.137254 | 0.137982 | 0.007628 | 0.600349 |
| MED31     | 0.057413 | 0.057103 | -0.00782 | 0.451994 |
| NCRUPAR   | 0.326681 | 0.356978 | 0.127953 | 0.307798 |
| ZMYM3     | 0.208566 | 0.217672 | 0.061652 | 0.368772 |
| HTR1F     | 0.429791 | 0.448953 | 0.062928 | 0.249084 |
| ADAM18    | 0.794548 | 0.775158 | -0.03564 | 0.084039 |
| FYTTD1    | 0.184919 | 0.183888 | -0.00807 | 0.486302 |
| REG4      | 0.292244 | 0.315124 | 0.108746 | 0.176113 |
| AKT1      | 0.550241 | 0.540845 | -0.02485 | 0.124349 |
| SLC7A7    | 0.359085 | 0.350231 | -0.03602 | 0.711218 |
| STAC2     | 0.222103 | 0.202216 | -0.13533 | 0.007569 |
| CKMT1A    | 0.630395 | 0.632712 | 0.005294 | 0.852228 |
| TBPL1     | 0.210892 | 0.213508 | 0.01778  | 0.325804 |
| EIF2B1    | 0.131601 | 0.131809 | 0.002276 | 0.24058  |
| CD70      | 0.046239 | 0.047834 | 0.048919 | 0.352844 |
| SASH3     | 0.585736 | 0.571533 | -0.03541 | 0.579464 |
| NKX6.1    | 0.095457 | 0.092292 | -0.04864 | 0.412438 |
| GABRA4    | 0.177386 | 0.189818 | 0.097719 | 0.237796 |
| TSGA14    | 0.202869 | 0.205332 | 0.017413 | 0.613369 |
| AMIGO2    | 0.12766  | 0.135699 | 0.088108 | 0.151481 |
| FLT4      | 0.359306 | 0.387889 | 0.110431 | 0.154157 |
| LIG1      | 0.341033 | 0.332742 | -0.03551 | 0.138018 |
| KRT74     | 0.45349  | 0.406963 | -0.15617 | 0.017328 |
| ST3GAL6   | 0.145892 | 0.140717 | -0.0521  | 0.240583 |
| MRAP      | 0.420311 | 0.432451 | 0.04108  | 0.18062  |
| LOC115111 | 0.714343 | 0.678258 | -0.07478 | 0.050753 |
| OR5AK2    | 0.355732 | 0.387131 | 0.122033 | 0.606845 |
| IPP       | 0.209948 | 0.210746 | 0.005478 | 0.949872 |
| ARPC1A    | 0.263733 | 0.264562 | 0.004527 | 0.597115 |
| GBP6      | 0.420564 | 0.474107 | 0.172888 | 0.027289 |
| TMEM41B   | 0.083535 | 0.085103 | 0.026839 | 0.702562 |
| NAPB      | 0.160933 | 0.162367 | 0.012802 | 0.336227 |
| ESYT3     | 0.347085 | 0.382444 | 0.139963 | 0.004215 |
| MIR320D2  | 0.195036 | 0.238536 | 0.290466 | 0.005093 |
| CYSLTR1   | 0.154769 | 0.16726  | 0.111984 | 0.416435 |
| TLR10     | 0.195556 | 0.192097 | -0.02574 | 0.546466 |

|          |          |          |          |          |
|----------|----------|----------|----------|----------|
| SYNE1    | 0.372147 | 0.386834 | 0.055841 | 0.064827 |
| RANBP1   | 0.385991 | 0.387289 | 0.004845 | 0.76212  |
| PRAMEF12 | 0.482843 | 0.484894 | 0.006115 | 0.961001 |
| TOX2     | 0.206368 | 0.190534 | -0.11517 | 0.022913 |
| PSORS1C1 | 0.274617 | 0.272209 | -0.01271 | 0.639774 |
| CD6      | 0.480821 | 0.437253 | -0.13703 | 0.001061 |
| FAM138D  | 0.359443 | 0.355645 | -0.01533 | 0.790669 |
| SNX5     | 0.243493 | 0.238726 | -0.02852 | 0.582655 |
| RWDD2B   | 0.29825  | 0.304489 | 0.029865 | 0.473276 |
| MON1A    | 0.412575 | 0.407204 | -0.0189  | 0.249082 |
| GIF      | 0.252771 | 0.292966 | 0.212899 | 0.103615 |
| MERTK    | 0.183792 | 0.191172 | 0.056793 | 0.381306 |
| SP2      | 0.242508 | 0.239628 | -0.01724 | 0.373754 |
| TACC2    | 0.387821 | 0.376801 | -0.04159 | 0.035503 |
| MYPN     | 0.400486 | 0.397241 | -0.01174 | 0.558926 |
| NISCH    | 0.667831 | 0.67272  | 0.010525 | 0.463276 |
| LTA      | 0.675677 | 0.603545 | -0.16287 | 0.00234  |
| PLS1     | 0.17485  | 0.177648 | 0.022904 | 0.589062 |
| UMODL1   | 0.467884 | 0.492021 | 0.072569 | 0.113877 |
| GNPTAB   | 0.222427 | 0.21817  | -0.02788 | 0.324659 |
| MAML3    | 0.390143 | 0.388202 | -0.0072  | 0.709484 |
| MYST3    | 0.291455 | 0.296643 | 0.025457 | 0.396686 |
| KANK1    | 0.105648 | 0.110055 | 0.05896  | 0.447811 |
| ATP6V0A4 | 0.668793 | 0.698309 | 0.062307 | 0.087436 |
| SPATA19  | 0.472545 | 0.419947 | -0.17025 | 0.009299 |
| LOC39059 | 0.532246 | 0.552013 | 0.052609 | 0.4151   |
| DMGDH    | 0.143935 | 0.150693 | 0.066197 | 0.77101  |
| ARFGAP2  | 0.137926 | 0.140489 | 0.026562 | 0.466124 |
| TELO2    | 0.57052  | 0.566512 | -0.01017 | 0.397985 |
| GDPD5    | 0.38068  | 0.376186 | -0.01713 | 0.386391 |
| LOC64340 | 0.604699 | 0.622404 | 0.041634 | 0.28834  |
| CCDC58   | 0.448551 | 0.461109 | 0.039837 | 0.380041 |
| NR1D1    | 0.18129  | 0.181991 | 0.005569 | 0.776357 |
| GFM1     | 0.224201 | 0.231364 | 0.045374 | 0.17169  |
| GTF3C6   | 0.085294 | 0.088123 | 0.047074 | 0.439497 |
| KRT13    | 0.542641 | 0.524485 | -0.0491  | 0.031994 |
| ARPC2    | 0.192494 | 0.193279 | 0.005868 | 0.758574 |
| CISD2    | 0.049035 | 0.048333 | -0.02081 | 0.887049 |
| DGAT2    | 0.252218 | 0.239605 | -0.07402 | 0.030892 |
| MIR711   | 0.849734 | 0.836899 | -0.02196 | 0.051025 |
| MIR135B  | 0.904505 | 0.891522 | -0.02086 | 0.016783 |
| CA7      | 0.25678  | 0.235025 | -0.12772 | 0.002968 |
| ABCA8    | 0.414671 | 0.4073   | -0.02587 | 0.922096 |
| CWC22    | 0.211687 | 0.213375 | 0.011458 | 0.762121 |
| FBXO4    | 0.176692 | 0.177036 | 0.00281  | 0.95729  |
| LOC10018 | 0.390039 | 0.390186 | 0.000542 | 0.751495 |
| SCN3B    | 0.182068 | 0.183678 | 0.012703 | 0.390234 |
| DUSP8    | 0.757834 | 0.749353 | -0.01624 | 0.352857 |
| PEG3     | 0.4935   | 0.504068 | 0.030568 | 0.417771 |
| ENGASE   | 0.385541 | 0.363444 | -0.08515 | 0.195455 |
| SIGLEC11 | 0.029917 | 0.0289   | -0.04991 | 0.549544 |
| SERHL2   | 0.179027 | 0.170232 | -0.07268 | 0.146239 |
| ADAM5P   | 0.413054 | 0.368872 | -0.16321 | 0.054738 |
| BATF2    | 0.182323 | 0.164647 | -0.14712 | 0.090498 |
| PACSIN3  | 0.339137 | 0.33458  | -0.01952 | 0.408467 |
| CCT7     | 0.141301 | 0.137386 | -0.04054 | 0.358931 |

|          |          |          |          |          |
|----------|----------|----------|----------|----------|
| RELN     | 0.224279 | 0.232566 | 0.052347 | 0.246228 |
| FAM127B  | 0.128425 | 0.144368 | 0.16883  | 0.577873 |
| ADAMTS7  | 0.442155 | 0.437798 | -0.01429 | 0.41777  |
| LENG9    | 0.179995 | 0.157686 | -0.1909  | 0.322378 |
| HTRA4    | 0.530955 | 0.515758 | -0.0419  | 0.577871 |
| VSIG10L  | 0.257175 | 0.249037 | -0.04639 | 0.258776 |
| PRR3     | 0.09664  | 0.097182 | 0.008065 | 0.753262 |
| RASSF4   | 0.331695 | 0.325002 | -0.02941 | 0.132537 |
| STBD1    | 0.118336 | 0.128729 | 0.121453 | 0.299046 |
| PIK3CD   | 0.400501 | 0.388412 | -0.04422 | 0.05622  |
| CASP3    | 0.36614  | 0.368555 | 0.009484 | 0.909164 |
| CKLF     | 0.23586  | 0.239075 | 0.01953  | 0.249081 |
| MUC15    | 0.56443  | 0.586846 | 0.056187 | 0.163098 |
| XPO4     | 0.303972 | 0.307442 | 0.016377 | 0.771009 |
| PLCB1    | 0.352069 | 0.344528 | -0.03124 | 0.251001 |
| PCDH11Y  | 0.158982 | 0.162211 | 0.029012 | 0.624862 |
| SNRNP20C | 0.328501 | 0.326002 | -0.01101 | 0.817692 |
| CWF19L2  | 0.132699 | 0.123912 | -0.09884 | 0.175371 |
| TNNT1    | 0.140482 | 0.130236 | -0.10926 | 0.38895  |
| MANBA    | 0.303503 | 0.311164 | 0.035966 | 0.154156 |
| TWISTNB  | 0.203684 | 0.212768 | 0.062947 | 0.152148 |
| DCAF7    | 0.180879 | 0.180931 | 0.000416 | 0.623213 |
| PDE1B    | 0.359604 | 0.346045 | -0.05545 | 0.188321 |
| 1.Mar    | 0.243429 | 0.261982 | 0.105967 | 0.060238 |
| SERPINH1 | 0.43227  | 0.416666 | -0.05304 | 0.372503 |
| PNPLA1   | 0.486698 | 0.476677 | -0.03001 | 0.225977 |
| HIST1H1D | 0.072673 | 0.062614 | -0.21495 | 0.066532 |
| MIR1915  | 0.061911 | 0.063396 | 0.034192 | 0.453396 |
| MSLN     | 0.450797 | 0.448488 | -0.00741 | 0.957291 |
| LOC10029 | 0.696193 | 0.702256 | 0.012511 | 0.321238 |
| TSGA13   | 0.191254 | 0.188362 | -0.02198 | 0.863198 |
| CXorf67  | 0.514848 | 0.531405 | 0.045667 | 0.382575 |
| CPXM2    | 0.449391 | 0.436764 | -0.04112 | 0.377518 |
| INO80B   | 0.041563 | 0.039132 | -0.08695 | 0.365048 |
| SLC39A1  | 0.113306 | 0.11669  | 0.042465 | 0.064153 |
| TOMM40L  | 0.201108 | 0.194657 | -0.04704 | 0.846755 |
| LOC10013 | 0.132526 | 0.154834 | 0.224447 | 0.111237 |
| IMPDH2   | 0.152046 | 0.149841 | -0.02108 | 0.368772 |
| PLAGL1   | 0.218378 | 0.220388 | 0.013217 | 0.859539 |
| LOC34234 | 0.445972 | 0.447443 | 0.004752 | 0.747965 |
| GNB1L    | 0.301738 | 0.299778 | -0.0094  | 0.541829 |
| DMRTC1B  | 0.557762 | 0.561082 | 0.008561 | 0.799651 |
| PPP1R16B | 0.354532 | 0.346861 | -0.03156 | 0.435376 |
| LCE3E    | 0.288634 | 0.291285 | 0.013192 | 0.763897 |
| LAPTM4B  | 0.225255 | 0.215506 | -0.06383 | 0.012231 |
| P4HA2    | 0.239224 | 0.233352 | -0.03586 | 0.264713 |
| SIPA1L1  | 0.624649 | 0.637858 | 0.03019  | 0.312234 |
| MIR2117  | 0.445764 | 0.419419 | -0.08789 | 0.375008 |
| SNORD18  | 0.529368 | 0.485297 | -0.1254  | 0.029475 |
| HAT1     | 0.219097 | 0.224795 | 0.037042 | 0.232288 |
| AHCY     | 0.163007 | 0.164033 | 0.009045 | 0.898098 |
| B4GALT7  | 0.303083 | 0.305986 | 0.013754 | 0.702563 |
| C2orf34  | 0.547305 | 0.541954 | -0.01418 | 0.546463 |
| EIF4G3   | 0.34201  | 0.34663  | 0.019361 | 0.382574 |
| TPO      | 0.670467 | 0.65738  | -0.02844 | 0.196258 |
| TMEM140  | 0.411787 | 0.423322 | 0.039855 | 0.486303 |

|           |          |          |          |          |
|-----------|----------|----------|----------|----------|
| GPR108    | 0.17199  | 0.175362 | 0.028015 | 0.377518 |
| ZSCAN22   | 0.214191 | 0.209808 | -0.02983 | 0.4534   |
| RALGAPA2  | 0.174039 | 0.169612 | -0.03717 | 0.688795 |
| YRDC      | 0.727297 | 0.732039 | 0.009376 | 0.792462 |
| SIRT4     | 0.299065 | 0.283903 | -0.07506 | 0.044491 |
| PCDHB11   | 0.328151 | 0.348758 | 0.087866 | 0.212871 |
| DSP       | 0.303859 | 0.295453 | -0.04048 | 0.124351 |
| NEK1      | 0.172303 | 0.174855 | 0.021213 | 0.358929 |
| SNCAIP    | 0.356653 | 0.377272 | 0.081081 | 0.013849 |
| ZNF792    | 0.154068 | 0.161074 | 0.064161 | 0.056522 |
| CACNG8    | 0.103269 | 0.111325 | 0.108365 | 0.246228 |
| RLN2      | 0.155099 | 0.147362 | -0.07382 | 0.179109 |
| UHRF1BP1  | 0.245745 | 0.24616  | 0.002436 | 0.643107 |
| FADD      | 0.041859 | 0.040936 | -0.03217 | 0.61663  |
| AFF2      | 0.249431 | 0.268968 | 0.108793 | 0.492154 |
| NARFL     | 0.425346 | 0.420236 | -0.01744 | 0.356494 |
| SULF2     | 0.175507 | 0.16962  | -0.04923 | 0.098767 |
| PITX1     | 0.096799 | 0.085523 | -0.17868 | 0.077963 |
| CSE1L     | 0.105761 | 0.106323 | 0.007644 | 0.788875 |
| GPR132    | 0.4961   | 0.473716 | -0.06661 | 0.263717 |
| ERAP1     | 0.251902 | 0.247312 | -0.02653 | 0.189888 |
| DOC2B     | 0.317903 | 0.315207 | -0.01229 | 0.509931 |
| EIF3E     | 0.047601 | 0.044527 | -0.09633 | 0.293656 |
| TRIP6     | 0.459581 | 0.483996 | 0.074676 | 0.109164 |
| SILV      | 0.37538  | 0.352383 | -0.09121 | 0.004062 |
| TAZ       | 0.175317 | 0.192747 | 0.13674  | 0.16879  |
| CPOX      | 0.155032 | 0.157877 | 0.026235 | 0.464701 |
| NEU1      | 0.382793 | 0.378433 | -0.01653 | 0.160306 |
| JUN       | 0.051006 | 0.056679 | 0.152149 | 0.563624 |
| KIAA1644  | 0.778915 | 0.754656 | -0.04565 | 0.019521 |
| RAB28     | 0.085071 | 0.087632 | 0.042784 | 0.139879 |
| TRPC6     | 0.174295 | 0.169907 | -0.03679 | 0.872359 |
| KCNJ6     | 0.375267 | 0.366277 | -0.03498 | 0.038673 |
| SNORD54   | 0.114073 | 0.114812 | 0.009317 | 0.597114 |
| GNB3      | 0.691945 | 0.673793 | -0.03835 | 0.272776 |
| RGS13     | 0.448366 | 0.452575 | 0.01348  | 0.460444 |
| SLC24A5   | 0.837    | 0.843899 | 0.011842 | 0.395377 |
| PLEKHG3   | 0.456468 | 0.444058 | -0.03977 | 0.242452 |
| MCART3P   | 0.691861 | 0.698291 | 0.013345 | 0.136169 |
| MECR      | 0.191259 | 0.192032 | 0.005825 | 0.611734 |
| XCR1      | 0.521568 | 0.507739 | -0.03877 | 0.38895  |
| NAP1L1    | 0.234649 | 0.23932  | 0.028435 | 0.673428 |
| SETD3     | 0.35624  | 0.356007 | -0.00094 | 0.80145  |
| ACHE      | 0.31801  | 0.323873 | 0.026356 | 0.520452 |
| EPS8L3    | 0.831031 | 0.816417 | -0.0256  | 0.025548 |
| PTPN11    | 0.088414 | 0.091609 | 0.05121  | 0.141131 |
| ADRA2A    | 0.210557 | 0.207825 | -0.01884 | 0.582655 |
| FOXI3     | 0.132108 | 0.124593 | -0.0845  | 0.228668 |
| HHLA1     | 0.455646 | 0.454556 | -0.00346 | 0.697388 |
| GALNTL1   | 0.197222 | 0.203244 | 0.043394 | 0.113344 |
| MMP17     | 0.429219 | 0.422515 | -0.02271 | 0.234112 |
| PTPN3     | 0.505964 | 0.485746 | -0.05883 | 0.027289 |
| FLJ36031  | 0.13221  | 0.132384 | 0.001898 | 0.562062 |
| C11orf86  | 0.643214 | 0.628808 | -0.03268 | 0.136173 |
| LOC14841  | 0.542288 | 0.556964 | 0.038527 | 0.41777  |
| SERPINB1C | 0.573765 | 0.563961 | -0.02486 | 0.354074 |

|           |          |          |          |          |
|-----------|----------|----------|----------|----------|
| LGALS3BP  | 0.379722 | 0.366363 | -0.05167 | 0.311124 |
| LOC40004  | 0.338364 | 0.345162 | 0.028698 | 0.41244  |
| GAB4      | 0.372667 | 0.374007 | 0.005178 | 0.961001 |
| NIPAL3    | 0.149372 | 0.148557 | -0.00789 | 0.876029 |
| ZNF284    | 0.048273 | 0.04984  | 0.046106 | 0.018802 |
| TBCE      | 0.235174 | 0.232586 | -0.01597 | 0.688795 |
| TRPC3     | 0.328598 | 0.360504 | 0.133695 | 0.035098 |
| RAPSN     | 0.51434  | 0.499356 | -0.04265 | 0.098767 |
| ERN2      | 0.324309 | 0.308096 | -0.07399 | 0.343297 |
| C20orf112 | 0.436438 | 0.442694 | 0.020532 | 0.4151   |
| FLJ44635  | 0.671028 | 0.662196 | -0.01911 | 0.377518 |
| GRP       | 0.22788  | 0.216119 | -0.07645 | 0.038237 |
| ECM1      | 0.618289 | 0.610769 | -0.01766 | 0.350457 |
| BAT4      | 0.143364 | 0.14715  | 0.037602 | 0.061198 |
| SLC6A12   | 0.467895 | 0.430774 | -0.11925 | 0.040688 |
| MKRN2     | 0.211857 | 0.205211 | -0.04598 | 0.311122 |
| PCGF5     | 0.222689 | 0.220699 | -0.01295 | 0.281003 |
| MSTN      | 0.450987 | 0.464073 | 0.041265 | 0.592276 |
| NHLH2     | 0.142145 | 0.123859 | -0.19866 | 0.057433 |
| LOC100271 | 0.406037 | 0.397402 | -0.03101 | 0.619926 |
| HAVCR1    | 0.551343 | 0.537996 | -0.03535 | 0.2894   |
| EXOSC2    | 0.43407  | 0.440394 | 0.020866 | 0.256816 |
| C1orf35   | 0.225574 | 0.236544 | 0.068506 | 0.258776 |
| IL21R     | 0.21453  | 0.188814 | -0.18422 | 0.043031 |
| MYH11     | 0.520011 | 0.513235 | -0.01892 | 0.120407 |
| SNORD115  | 0.434277 | 0.442903 | 0.028375 | 0.531087 |
| OPN5      | 0.318309 | 0.340784 | 0.098427 | 0.222428 |
| MMP13     | 0.672851 | 0.726732 | 0.111137 | 0.064827 |
| CLCNKB    | 0.474302 | 0.448305 | -0.08133 | 0.022913 |
| 7.Sep     | 0.196407 | 0.20104  | 0.033636 | 0.173891 |
| TRIM15    | 0.311871 | 0.297192 | -0.06955 | 0.603594 |
| PHF23     | 0.068166 | 0.072377 | 0.086478 | 0.042316 |
| HPCAL4    | 0.293995 | 0.295105 | 0.005437 | 0.514426 |
| SMCR7L    | 0.099413 | 0.103002 | 0.051155 | 0.186759 |
| MTVR2     | 0.233239 | 0.242118 | 0.053901 | 0.188321 |
| ALG3      | 0.106778 | 0.107219 | 0.005954 | 0.658197 |
| INADL     | 0.290985 | 0.296244 | 0.025841 | 0.249085 |
| TRAK2     | 0.147618 | 0.143274 | -0.0431  | 0.41777  |
| PSG6      | 0.334941 | 0.337309 | 0.010161 | 0.929495 |
| PMCHL1    | 0.340528 | 0.343111 | 0.010903 | 0.983281 |
| VILL      | 0.426715 | 0.410592 | -0.05557 | 0.008223 |
| LOC28569  | 0.401578 | 0.389405 | -0.04441 | 0.492151 |
| DUSP23    | 0.265042 | 0.27195  | 0.037125 | 0.912856 |
| H3F3B     | 0.067569 | 0.072854 | 0.108649 | 0.044489 |
| NBPF16    | 0.557234 | 0.567763 | 0.027006 | 0.137401 |
| HDAC8     | 0.36197  | 0.35463  | -0.02955 | 0.492151 |
| MON2      | 0.125365 | 0.128333 | 0.033759 | 0.221546 |
| RPS7      | 0.187579 | 0.178711 | -0.06987 | 0.077181 |
| SEMA4D    | 0.728584 | 0.734401 | 0.011472 | 0.350451 |
| RELL2     | 0.106606 | 0.108959 | 0.031491 | 0.610102 |
| TTYH1     | 0.16745  | 0.167354 | -0.00083 | 0.914703 |
| SKA3      | 0.041089 | 0.042298 | 0.041831 | 0.29471  |
| PSMB11    | 0.723028 | 0.720978 | -0.0041  | 0.774572 |
| RPL23AP6  | 0.603814 | 0.608314 | 0.010712 | 0.735647 |
| TMEM40    | 0.405277 | 0.371298 | -0.12633 | 0.002269 |
| KDM6A     | 0.146337 | 0.145781 | -0.00549 | 0.981423 |

|           |          |          |          |          |
|-----------|----------|----------|----------|----------|
| ALDH4A1   | 0.374297 | 0.368223 | -0.02361 | 0.314469 |
| TMEM19    | 0.19063  | 0.183882 | -0.052   | 0.154829 |
| AMY2B     | 0.244618 | 0.255002 | 0.059977 | 0.574694 |
| GFRA4     | 0.373017 | 0.363662 | -0.03664 | 0.537211 |
| CPEB4     | 0.261222 | 0.259327 | -0.0105  | 0.903629 |
| KRT83     | 0.597767 | 0.54942  | -0.12167 | 0.022224 |
| ACBD4     | 0.159566 | 0.161276 | 0.015371 | 0.540287 |
| RPIA      | 0.171887 | 0.17323  | 0.011225 | 0.408466 |
| MURC      | 0.798391 | 0.821651 | 0.041431 | 0.182137 |
| UBAP2L    | 0.218316 | 0.225309 | 0.045487 | 0.100684 |
| CXCL2     | 0.122594 | 0.1338   | 0.126189 | 0.094102 |
| SLC25A23  | 0.048005 | 0.047391 | -0.01857 | 0.37751  |
| C21orf129 | 0.2637   | 0.295203 | 0.162809 | 0.163097 |
| GLTPD2    | 0.212111 | 0.20128  | -0.07562 | 0.071512 |
| PLEKHG4   | 0.400716 | 0.39355  | -0.02604 | 0.041378 |
| LOC72840  | 0.230038 | 0.235527 | 0.034023 | 0.363831 |
| NCRNA00   | 0.460746 | 0.472555 | 0.036511 | 0.439498 |
| KRCC1     | 0.124344 | 0.126927 | 0.029657 | 0.227767 |
| DDRKG1    | 0.125101 | 0.130594 | 0.061996 | 0.055326 |
| ICAM2     | 0.393231 | 0.376307 | -0.06347 | 0.047275 |
| NLK       | 0.555284 | 0.571628 | 0.04185  | 0.099721 |
| PEG10     | 0.74726  | 0.742831 | -0.00858 | 0.37877  |
| HPYR1     | 0.617638 | 0.642025 | 0.055867 | 0.279965 |
| TEX13A    | 0.398899 | 0.402477 | 0.01288  | 0.839469 |
| LY86      | 0.32323  | 0.30056  | -0.10491 | 0.218916 |
| BRCC3     | 0.09711  | 0.115069 | 0.244813 | 0.175368 |
| CFHR1     | 0.256346 | 0.298653 | 0.22038  | 0.02778  |
| VCL       | 0.416086 | 0.421467 | 0.018537 | 0.892573 |
| NUDT16    | 0.253439 | 0.257535 | 0.02313  | 0.479042 |
| SLC34A2   | 0.388561 | 0.394146 | 0.020592 | 0.473277 |
| CDRT15    | 0.678196 | 0.697232 | 0.039935 | 0.179105 |
| LOC10013  | 0.145542 | 0.145995 | 0.004477 | 0.725143 |
| SENP3     | 0.374566 | 0.372487 | -0.00803 | 0.324659 |
| PDZD2     | 0.570662 | 0.562278 | -0.02135 | 0.279963 |
| ADAT2     | 0.110301 | 0.109096 | -0.01585 | 0.973995 |
| C8orf31   | 0.067769 | 0.069007 | 0.026105 | 0.792462 |
| CADM1     | 0.398801 | 0.398253 | -0.00199 | 0.769229 |
| LOC14547  | 0.577282 | 0.590665 | 0.033065 | 0.170234 |
| C21orf119 | 0.048633 | 0.047886 | -0.02233 | 0.726885 |
| DPYSL3    | 0.319134 | 0.326895 | 0.034662 | 0.118748 |
| PCCA      | 0.500491 | 0.49942  | -0.00309 | 0.649793 |
| NOV       | 0.134847 | 0.134967 | 0.001283 | 0.942457 |
| SAA1      | 0.219171 | 0.234884 | 0.099886 | 0.113877 |
| RDH5      | 0.604372 | 0.606363 | 0.004745 | 0.760347 |
| SIM2      | 0.146211 | 0.145688 | -0.00517 | 0.548015 |
| GK2       | 0.628647 | 0.706767 | 0.168985 | 0.008223 |
| C16orf90  | 0.824017 | 0.802912 | -0.03743 | 0.005961 |
| CCNI2     | 0.262915 | 0.284141 | 0.112015 | 0.182905 |
| PION      | 0.202341 | 0.203998 | 0.01177  | 0.787084 |
| INPP5J    | 0.529589 | 0.518762 | -0.0298  | 0.087869 |
| LOC14648  | 0.532564 | 0.475185 | -0.16447 | 0.051308 |
| MIR1292   | 0.04394  | 0.042703 | -0.04122 | 0.629809 |
| WDSUB1    | 0.243668 | 0.248156 | 0.026329 | 0.25293  |
| TICAM1    | 0.32601  | 0.320686 | -0.02375 | 0.435377 |
| ABL2      | 0.263654 | 0.26673  | 0.016733 | 0.517435 |
| FLJ36777  | 0.284901 | 0.251329 | -0.18088 | 0.119853 |

|          |          |          |          |          |
|----------|----------|----------|----------|----------|
| OTUD6A   | 0.551631 | 0.55743  | 0.015087 | 0.894414 |
| GFRAL    | 0.188407 | 0.222794 | 0.241854 | 0.029648 |
| PPP1R1C  | 0.405188 | 0.40979  | 0.016293 | 0.424491 |
| ZNF678   | 0.277577 | 0.273937 | -0.01904 | 0.592277 |
| PPARG    | 0.276762 | 0.270598 | -0.03249 | 0.396688 |
| TAS2R14  | 0.86941  | 0.894266 | 0.040666 | 0.163081 |
| FLJ40330 | 0.255391 | 0.258324 | 0.016476 | 0.616644 |
| TAAR5    | 0.314058 | 0.329801 | 0.070566 | 0.876029 |
| IGFL1    | 0.291347 | 0.271391 | -0.10236 | 0.27687  |
| MYL10    | 0.287065 | 0.268838 | -0.09464 | 0.053573 |
| DMRT1    | 0.070863 | 0.064929 | -0.12617 | 0.049928 |
| ABCA1    | 0.391293 | 0.399854 | 0.031223 | 0.193056 |
| MAL2     | 0.215875 | 0.22577  | 0.064659 | 0.534145 |
| TBC1D1   | 0.478758 | 0.494428 | 0.046462 | 0.156866 |
| GIPC2    | 0.150967 | 0.137178 | -0.13819 | 0.323517 |
| COTL1    | 0.38204  | 0.361985 | -0.0778  | 0.237794 |
| C4orf32  | 0.152908 | 0.152921 | 0.000124 | 0.994427 |
| ZFAND5   | 0.078099 | 0.076288 | -0.03384 | 0.601968 |
| NBPF22P  | 0.555982 | 0.586624 | 0.077397 | 0.211164 |
| TMEM26   | 0.324489 | 0.336037 | 0.050451 | 0.146888 |
| RGS4     | 0.340113 | 0.348172 | 0.033786 | 0.277899 |
| GRM7     | 0.33562  | 0.34316  | 0.032054 | 0.275841 |
| CCIN     | 0.768871 | 0.743608 | -0.0482  | 0.032366 |
| N4BP3    | 0.371353 | 0.374877 | 0.013624 | 0.73214  |
| ZNF835   | 0.286114 | 0.281427 | -0.02383 | 0.375005 |
| TRYX3    | 0.696364 | 0.701039 | 0.009655 | 0.577871 |
| RHPN1    | 0.46104  | 0.423395 | -0.12289 | 0.010221 |
| OTUB1    | 0.328193 | 0.322964 | -0.02317 | 0.27687  |
| TUBAL3   | 0.414693 | 0.426628 | 0.040937 | 0.17169  |
| ZNF670   | 0.153534 | 0.155368 | 0.017125 | 0.597114 |
| C6orf150 | 0.299028 | 0.32431  | 0.11709  | 0.162395 |
| DPH1     | 0.175311 | 0.169128 | -0.0518  | 0.169512 |
| DMTF1    | 0.142239 | 0.143108 | 0.008793 | 0.673428 |
| CDK2AP2  | 0.097985 | 0.104403 | 0.091524 | 0.026171 |
| GPR4     | 0.304473 | 0.309498 | 0.023617 | 0.733893 |
| YY1AP1   | 0.139303 | 0.141269 | 0.020224 | 0.427197 |
| C12orf62 | 0.116941 | 0.114734 | -0.0275  | 0.391517 |
| DNTTIP1  | 0.879174 | 0.86617  | -0.0215  | 0.031801 |
| LCAT     | 0.786712 | 0.789854 | 0.00575  | 0.716421 |
| MRC1     | 0.78661  | 0.768384 | -0.03382 | 0.25681  |
| AKAP6    | 0.523468 | 0.529818 | 0.017395 | 0.512923 |
| ZIK1     | 0.299589 | 0.308801 | 0.043691 | 0.109164 |
| MAK16    | 0.163143 | 0.167185 | 0.03531  | 0.255841 |
| FGD4     | 0.372085 | 0.405807 | 0.12516  | 0.030353 |
| HS6ST2   | 0.414459 | 0.412515 | -0.00679 | 0.949872 |
| PTPMT1   | 0.195074 | 0.197452 | 0.017477 | 0.611734 |
| SUV420H2 | 0.210231 | 0.215038 | 0.032621 | 0.636448 |
| HYAL4    | 0.062129 | 0.060786 | -0.03153 | 0.639773 |
| BRSK1    | 0.587428 | 0.58498  | -0.00603 | 0.751495 |
| CTSL1    | 0.248837 | 0.250667 | 0.010571 | 0.355285 |
| MLLT6    | 0.359537 | 0.352644 | -0.02793 | 0.329256 |
| NCRNA00: | 0.31134  | 0.379109 | 0.284122 | 0.077182 |
| SLC13A1  | 0.533913 | 0.527118 | -0.01848 | 0.985138 |
| SNHG4    | 0.343507 | 0.330326 | -0.05645 | 0.114943 |
| ACCN5    | 0.129821 | 0.139042 | 0.098995 | 0.357713 |
| GABRA2   | 0.087106 | 0.082083 | -0.08568 | 0.425841 |

|           |          |          |          |          |
|-----------|----------|----------|----------|----------|
| LRRC14B   | 0.43821  | 0.453049 | 0.048043 | 0.454806 |
| LDLRAD1   | 0.580209 | 0.533422 | -0.12129 | 0.00082  |
| HTR1B     | 0.125989 | 0.128009 | 0.022947 | 0.19226  |
| BTBD2     | 0.565927 | 0.557337 | -0.02207 | 0.236869 |
| SEC61G    | 0.072942 | 0.075688 | 0.053303 | 0.099718 |
| OR2T4     | 0.23872  | 0.209376 | -0.18922 | 0.105606 |
| KIFAP3    | 0.133885 | 0.135984 | 0.022441 | 0.344482 |
| ADNP      | 0.211936 | 0.227212 | 0.100409 | 0.00502  |
| NPM2      | 0.197716 | 0.209956 | 0.086658 | 0.728639 |
| ZNF585B   | 0.267137 | 0.272156 | 0.026853 | 0.421795 |
| BARX1     | 0.14636  | 0.164288 | 0.166703 | 0.07915  |
| FKBP10    | 0.18452  | 0.186504 | 0.01543  | 0.648122 |
| TLCD2     | 0.144053 | 0.130186 | -0.14603 | 0.027127 |
| DEFB132   | 0.563758 | 0.556976 | -0.01746 | 0.935048 |
| CSTF1     | 0.437737 | 0.438464 | 0.002395 | 0.912856 |
| PLSCR4    | 0.19495  | 0.208194 | 0.094821 | 0.290462 |
| AIP       | 0.30031  | 0.296926 | -0.01635 | 0.439499 |
| PAPSS1    | 0.258659 | 0.26561  | 0.038256 | 0.14051  |
| CARKD     | 0.455009 | 0.450348 | -0.01486 | 0.368771 |
| ARHGAP15  | 0.165809 | 0.161556 | -0.03749 | 0.520451 |
| STARD3    | 0.316582 | 0.311475 | -0.02346 | 0.477596 |
| NCAPH     | 0.156098 | 0.153718 | -0.02216 | 0.653151 |
| C3orf62   | 0.248457 | 0.25173  | 0.018883 | 0.839469 |
| ATP1A3    | 0.236698 | 0.233323 | -0.02072 | 0.470409 |
| SNORD83   | 0.764104 | 0.761435 | -0.00505 | 0.490683 |
| KCTD19    | 0.2888   | 0.268692 | -0.10412 | 0.028113 |
| OR52I2    | 0.339315 | 0.353033 | 0.057178 | 0.537211 |
| ZNF579    | 0.548598 | 0.553007 | 0.011548 | 0.403205 |
| CCNB3     | 0.338595 | 0.35974  | 0.087395 | 0.10411  |
| LIME1     | 0.649746 | 0.654023 | 0.009464 | 0.32695  |
| CHD3      | 0.413582 | 0.408697 | -0.01714 | 0.794258 |
| EFCAB9    | 0.427721 | 0.413524 | -0.0487  | 0.197877 |
| ZNF562    | 0.078081 | 0.077887 | -0.00359 | 0.493617 |
| FAM117B   | 0.136403 | 0.137946 | 0.016227 | 0.302307 |
| SRRM1     | 0.253744 | 0.259067 | 0.029954 | 0.216311 |
| SMAD4     | 0.102889 | 0.100813 | -0.02941 | 0.477591 |
| EXPH5     | 0.348611 | 0.358862 | 0.04181  | 0.258776 |
| BSN       | 0.581351 | 0.578725 | -0.00653 | 0.618281 |
| BRP44L    | 0.141557 | 0.149039 | 0.074308 | 0.002547 |
| C20orf197 | 0.411295 | 0.389899 | -0.07707 | 0.044986 |
| NLGN3     | 0.419448 | 0.432718 | 0.044936 | 0.34567  |
| TCOF1     | 0.222661 | 0.218536 | -0.02698 | 0.340928 |
| KITLG     | 0.21671  | 0.2242   | 0.049018 | 0.521964 |
| EPB42     | 0.397281 | 0.388109 | -0.0337  | 0.143034 |
| OR4C11    | 0.291805 | 0.31588  | 0.114375 | 0.489222 |
| SLC25A2   | 0.610406 | 0.63223  | 0.050679 | 0.287287 |
| LRRC52    | 0.771922 | 0.773045 | 0.002096 | 0.456207 |
| POR       | 0.550624 | 0.545957 | -0.01228 | 0.376262 |
| LAGE3     | 0.191824 | 0.220159 | 0.198766 | 0.191467 |
| MIB2      | 0.473316 | 0.47474  | 0.004332 | 0.718169 |
| MIR487A   | 0.898408 | 0.889997 | -0.01357 | 0.263703 |
| LOC10010  | 0.22368  | 0.224196 | 0.003326 | 0.979566 |
| KIFC3     | 0.500414 | 0.493101 | -0.02124 | 0.173889 |
| KRTAP19.7 | 0.590518 | 0.61819  | 0.066069 | 0.385118 |
| KBTBD11   | 0.355229 | 0.355146 | -0.00034 | 0.846755 |
| UBQLNL    | 0.399311 | 0.425827 | 0.092755 | 0.445031 |

|           |          |          |          |          |
|-----------|----------|----------|----------|----------|
| ANXA8L1   | 0.826756 | 0.804657 | -0.03909 | 0.331562 |
| MIR611    | 0.068515 | 0.067191 | -0.02814 | 0.629814 |
| OR2G6     | 0.258587 | 0.270007 | 0.062349 | 0.392809 |
| ZNF480    | 0.096265 | 0.098507 | 0.033202 | 0.429912 |
| SOCS3     | 0.108362 | 0.102571 | -0.07924 | 0.08615  |
| ARSJ      | 0.136637 | 0.141802 | 0.053532 | 0.509931 |
| LOC100121 | 0.522062 | 0.513928 | -0.02265 | 0.411112 |
| CHMP4C    | 0.379759 | 0.399771 | 0.074087 | 0.289401 |
| CDCA4     | 0.189629 | 0.184563 | -0.03906 | 0.434006 |
| TIAL1     | 0.224095 | 0.227121 | 0.019351 | 0.471842 |
| TSHZ3     | 0.262824 | 0.249871 | -0.07292 | 0.007413 |
| ZNF524    | 0.751846 | 0.741966 | -0.01908 | 0.192255 |
| CDK11A    | 0.649712 | 0.652327 | 0.005794 | 0.760346 |
| FGF4      | 0.129697 | 0.127977 | -0.01925 | 0.885214 |
| CFL1      | 0.179886 | 0.180153 | 0.002137 | 0.633128 |
| STON1     | 0.896437 | 0.882181 | -0.02313 | 0.051024 |
| ZBTB38    | 0.47771  | 0.485276 | 0.022673 | 0.136785 |
| RPL31P11  | 0.290295 | 0.301483 | 0.05456  | 0.582655 |
| NR1H2     | 0.285895 | 0.281375 | -0.02299 | 0.606842 |
| LRTM1     | 0.409856 | 0.414322 | 0.015636 | 0.571524 |
| CUL3      | 0.303566 | 0.311211 | 0.035882 | 0.357713 |
| TRO       | 0.352958 | 0.370211 | 0.06885  | 0.077182 |
| C20orf173 | 0.327823 | 0.330888 | 0.013426 | 0.407148 |
| C1orf57   | 0.201974 | 0.198143 | -0.02762 | 0.304495 |
| NSMAF     | 0.153268 | 0.149788 | -0.03313 | 0.477596 |
| FAM118B   | 0.409187 | 0.415464 | 0.021965 | 0.546466 |
| EPHX3     | 0.36591  | 0.384078 | 0.069912 | 0.51593  |
| CHRNA2    | 0.479124 | 0.478095 | -0.0031  | 0.624861 |
| TP53RK    | 0.031541 | 0.030257 | -0.05999 | 0.692212 |
| ZNFX1     | 0.844707 | 0.840542 | -0.00713 | 0.416423 |
| ALG13     | 0.221687 | 0.225598 | 0.02523  | 0.288342 |
| PM20D1    | 0.404701 | 0.405034 | 0.001184 | 0.981423 |
| RPL35     | 0.216175 | 0.206429 | -0.06655 | 0.20114  |
| ZNF703    | 0.112025 | 0.109383 | -0.03443 | 0.521964 |
| CCDC46    | 0.250918 | 0.234748 | -0.0961  | 0.144951 |
| PECAM1    | 0.442388 | 0.418674 | -0.07949 | 0.008452 |
| STX8      | 0.551134 | 0.549253 | -0.00493 | 0.828563 |
| HIST1H1B  | 0.149949 | 0.141517 | -0.08349 | 0.371256 |
| ICA1L     | 0.126215 | 0.126351 | 0.001555 | 0.887053 |
| TMEM229   | 0.176358 | 0.16887  | -0.06259 | 0.340931 |
| LSM12     | 0.265215 | 0.269396 | 0.022567 | 0.348059 |
| METTL2A   | 0.059353 | 0.061248 | 0.045356 | 0.292584 |
| RUNDC2A   | 0.403991 | 0.40499  | 0.003561 | 0.707751 |
| MNAT1     | 0.408667 | 0.412162 | 0.012288 | 0.774574 |
| MAP3K2    | 0.447052 | 0.460808 | 0.043723 | 0.436746 |
| FAM50B    | 0.448277 | 0.446405 | -0.00604 | 0.957291 |
| CNN3      | 0.376497 | 0.372945 | -0.01367 | 0.568359 |
| KCNJ11    | 0.417122 | 0.406888 | -0.03584 | 0.057739 |
| NBPF4     | 0.505278 | 0.512812 | 0.021351 | 0.649797 |
| CTSW      | 0.017891 | 0.020976 | 0.229541 | 0.843011 |
| UGT2A2    | 0.59401  | 0.628678 | 0.081834 | 0.326952 |
| FABP2     | 0.456212 | 0.473603 | 0.053973 | 0.320104 |
| S1PR4     | 0.48602  | 0.497448 | 0.033529 | 0.796055 |
| PICALM    | 0.268669 | 0.272821 | 0.022124 | 0.404518 |
| C10orf76  | 0.203776 | 0.20423  | 0.003215 | 0.606844 |
| SEZ6L     | 0.254173 | 0.257898 | 0.02099  | 0.544918 |

|          |          |          |          |          |
|----------|----------|----------|----------|----------|
| PISD     | 0.320774 | 0.328605 | 0.034795 | 0.316718 |
| HIP1R    | 0.419494 | 0.410643 | -0.03077 | 0.087007 |
| GPBP1    | 0.238896 | 0.243022 | 0.024703 | 0.505452 |
| ABCC10   | 0.54421  | 0.54185  | -0.00627 | 0.581059 |
| OR51A2   | 0.16915  | 0.183205 | 0.115162 | 0.994427 |
| C20orf70 | 0.434947 | 0.469932 | 0.111613 | 0.183672 |
| POF1B    | 0.486708 | 0.534983 | 0.136438 | 0.09782  |
| CD96     | 0.590003 | 0.598    | 0.019422 | 0.658197 |
| FRMPD2L1 | 0.862551 | 0.858937 | -0.00606 | 0.772788 |
| CD1A     | 0.407498 | 0.422816 | 0.053239 | 0.785294 |
| ZNF432   | 0.041262 | 0.041307 | 0.001599 | 0.554223 |
| FBXL5    | 0.31152  | 0.324029 | 0.056794 | 0.093645 |
| ID1      | 0.037897 | 0.037329 | -0.02178 | 0.315562 |
| PRR21    | 0.390476 | 0.381068 | -0.03519 | 0.486303 |
| RAX      | 0.109715 | 0.10664  | -0.04101 | 0.365062 |
| EFCAB4B  | 0.347873 | 0.316964 | -0.13424 | 0.044987 |
| DUT      | 0.12321  | 0.1177   | -0.066   | 0.076403 |
| SH2D4B   | 0.44674  | 0.440818 | -0.01925 | 0.718168 |
| ERGIC2   | 0.254431 | 0.259921 | 0.030799 | 0.666642 |
| EPHX2    | 0.294226 | 0.288767 | -0.02702 | 0.352865 |
| CDH6     | 0.310331 | 0.31145  | 0.005194 | 0.832195 |
| UBC      | 0.160854 | 0.163885 | 0.026927 | 0.492152 |
| ELF3     | 0.575426 | 0.560081 | -0.039   | 0.021288 |
| SLFN11   | 0.080021 | 0.084202 | 0.073476 | 0.23047  |
| RNASE3   | 0.15205  | 0.136423 | -0.15646 | 0.070784 |
| WASH3P   | 0.391835 | 0.386693 | -0.01906 | 0.473277 |
| TTC15    | 0.6427   | 0.638344 | -0.00981 | 0.562059 |
| CAPS2    | 0.28618  | 0.275329 | -0.05576 | 0.138018 |
| UFSP1    | 0.139552 | 0.139508 | -0.00046 | 0.852229 |
| MMACHC   | 0.28658  | 0.296649 | 0.049821 | 0.505454 |
| RAI2     | 0.222756 | 0.232379 | 0.061016 | 0.411113 |
| CYFIP1   | 0.548824 | 0.568694 | 0.051308 | 0.182905 |
| SLC24A2  | 0.43362  | 0.423535 | -0.03395 | 0.456212 |
| WBP11    | 0.120127 | 0.120232 | 0.001254 | 0.706019 |
| LOC10013 | 0.187563 | 0.202249 | 0.108758 | 0.236871 |
| NDST2    | 0.396569 | 0.398022 | 0.005274 | 0.834011 |
| CSDC2    | 0.2588   | 0.244074 | -0.08452 | 0.044    |
| IL26     | 0.58035  | 0.596694 | 0.040066 | 0.419111 |
| CALCB    | 0.310188 | 0.310617 | 0.001994 | 0.84311  |
| PTPRV    | 0.321467 | 0.310566 | -0.04977 | 0.109681 |
| LCE2D    | 0.169543 | 0.160936 | -0.07516 | 0.252931 |
| MIR140   | 0.871815 | 0.859686 | -0.02021 | 0.004001 |
| ACTL7A   | 0.924233 | 0.923415 | -0.00128 | 0.141063 |
| GCC1     | 0.187846 | 0.185203 | -0.02044 | 0.728639 |
| PWWP2A   | 0.309572 | 0.311708 | 0.009919 | 0.692227 |
| TGIF2    | 0.287201 | 0.293964 | 0.033579 | 0.453401 |
| MYL7     | 0.513647 | 0.495077 | -0.05312 | 0.05103  |
| ATP2A1   | 0.55479  | 0.562306 | 0.019414 | 0.156185 |
| TNFRSF18 | 0.250492 | 0.252707 | 0.012698 | 0.634786 |
| NCRNA00  | 0.600152 | 0.601464 | 0.00315  | 0.87236  |
| IL17RB   | 0.19124  | 0.186218 | -0.03839 | 0.281004 |
| CNOT6    | 0.239453 | 0.246457 | 0.041592 | 0.088739 |
| CNTLN    | 0.435841 | 0.447879 | 0.039309 | 0.072618 |
| CLCNKA   | 0.491848 | 0.470351 | -0.06448 | 0.008988 |
| LOC72839 | 0.141737 | 0.145408 | 0.036885 | 0.728639 |
| CASD1    | 0.12224  | 0.12197  | -0.00319 | 0.611733 |

|           |          |          |          |          |
|-----------|----------|----------|----------|----------|
| CCNI      | 0.112322 | 0.115635 | 0.041946 | 0.262722 |
| STAT3     | 0.365513 | 0.362656 | -0.01132 | 0.765672 |
| FES       | 0.631022 | 0.615732 | -0.03539 | 0.392806 |
| ATP2C2    | 0.419942 | 0.403784 | -0.05661 | 0.097819 |
| SPDYE8P   | 0.809624 | 0.806357 | -0.00583 | 0.681944 |
| MYLPF     | 0.348875 | 0.344212 | -0.01941 | 0.744438 |
| RAET1K    | 0.146544 | 0.145214 | -0.01315 | 0.77279  |
| LTB       | 0.275837 | 0.265546 | -0.05485 | 0.283088 |
| HINFP     | 0.125698 | 0.124413 | -0.01483 | 0.641438 |
| DOC2A     | 0.401479 | 0.408136 | 0.023726 | 0.275842 |
| MIR384    | 0.306648 | 0.281931 | -0.12124 | 0.124923 |
| ACOT8     | 0.099585 | 0.102048 | 0.035253 | 0.253897 |
| SSH2      | 0.425718 | 0.41567  | -0.03446 | 0.352862 |
| MCM5      | 0.360386 | 0.366324 | 0.023581 | 0.335058 |
| DGAT2L6   | 0.421763 | 0.404118 | -0.06166 | 0.506944 |
| SLC34A1   | 0.510231 | 0.492464 | -0.05113 | 0.288342 |
| KIAA1908  | 0.31143  | 0.312652 | 0.005651 | 0.587458 |
| LOC10013  | 0.556451 | 0.580301 | 0.060548 | 0.224198 |
| FAM57B    | 0.286708 | 0.292462 | 0.02867  | 0.518943 |
| KRTAP5.9  | 0.498438 | 0.514708 | 0.04634  | 0.191468 |
| BRDT      | 0.52239  | 0.5485   | 0.070363 | 0.029999 |
| FSTL1     | 0.451793 | 0.45123  | -0.0018  | 0.735648 |
| C20orf30  | 0.103137 | 0.106553 | 0.047005 | 0.07449  |
| HMG20B    | 0.277004 | 0.299638 | 0.113316 | 0.038893 |
| CD52      | 0.444268 | 0.37895  | -0.22942 | 0.008806 |
| SETDB1    | 0.254203 | 0.255961 | 0.009942 | 0.386388 |
| ZNF500    | 0.394193 | 0.389354 | -0.01782 | 0.624861 |
| C10orf118 | 0.320461 | 0.332356 | 0.052583 | 0.236871 |
| SNORD105  | 0.247842 | 0.227555 | -0.12321 | 0.052999 |
| GPD1L     | 0.244519 | 0.240045 | -0.02664 | 0.49362  |
| AFM       | 0.126773 | 0.130964 | 0.046923 | 0.806855 |
| ZNF514    | 0.246126 | 0.245417 | -0.00416 | 0.668334 |
| DNAJC4    | 0.068764 | 0.069518 | 0.015724 | 0.372495 |
| LOC100131 | 0.60209  | 0.604501 | 0.005765 | 0.335057 |
| SNORD115  | 0.359242 | 0.357228 | -0.00811 | 0.799651 |
| SP140L    | 0.524304 | 0.512673 | -0.03237 | 0.756803 |
| FAM174A   | 0.273146 | 0.275703 | 0.013442 | 0.460445 |
| CLYBL     | 0.286303 | 0.293322 | 0.03494  | 0.626511 |
| TMEM154   | 0.311556 | 0.281994 | -0.14383 | 0.010085 |
| CALN1     | 0.271942 | 0.286977 | 0.077633 | 0.146888 |
| PGK2      | 0.405945 | 0.460274 | 0.181207 | 0.193056 |
| KIF1A     | 0.585148 | 0.587106 | 0.004819 | 0.589061 |
| TMC7      | 0.309898 | 0.302409 | -0.0353  | 0.226871 |
| UPF2      | 0.165831 | 0.17     | 0.035827 | 0.718167 |
| SPRY1     | 0.164384 | 0.168253 | 0.033563 | 0.700837 |
| ADH5      | 0.085822 | 0.086405 | 0.009773 | 0.493619 |
| CARD6     | 0.232816 | 0.227003 | -0.03648 | 0.697389 |
| C11orf90  | 0.345774 | 0.332224 | -0.05767 | 0.72689  |
| TSPAN18   | 0.452089 | 0.446866 | -0.01676 | 0.349255 |
| ProSAPiP1 | 0.744194 | 0.739826 | -0.00849 | 0.730386 |
| GYG1      | 0.435291 | 0.436928 | 0.005417 | 0.760346 |
| TWIST1    | 0.133455 | 0.186865 | 0.48564  | 0.004153 |
| FRMD4A    | 0.483978 | 0.471428 | -0.03791 | 0.094102 |
| LOH12CR2  | 0.202734 | 0.185036 | -0.13178 | 0.087008 |
| FREM3     | 0.116538 | 0.118224 | 0.020719 | 0.758575 |
| MIR29A    | 0.706257 | 0.684499 | -0.04514 | 0.427198 |

|           |          |          |          |          |
|-----------|----------|----------|----------|----------|
| HDAC7     | 0.32692  | 0.316711 | -0.04577 | 0.223312 |
| TTC17     | 0.088681 | 0.089525 | 0.013656 | 0.671729 |
| CCNE1     | 0.248679 | 0.251245 | 0.014807 | 0.415099 |
| IGSF9B    | 0.483761 | 0.477664 | -0.0183  | 0.222427 |
| CES4      | 0.565972 | 0.552066 | -0.03589 | 0.397986 |
| CASQ1     | 0.541982 | 0.524173 | -0.0482  | 0.179108 |
| JAKMIP1   | 0.527999 | 0.53032  | 0.006329 | 0.514425 |
| PDS5B     | 0.30711  | 0.302469 | -0.02197 | 0.223311 |
| RNASEH1   | 0.320221 | 0.315363 | -0.02205 | 0.233197 |
| IL1RAPL2  | 0.26075  | 0.274653 | 0.074943 | 0.397988 |
| DCHS2     | 0.221627 | 0.242995 | 0.132789 | 0.040233 |
| LZTS2     | 0.399502 | 0.395964 | -0.01283 | 0.372505 |
| GRTP1     | 0.419664 | 0.434181 | 0.049061 | 0.427198 |
| LOC64699  | 0.204738 | 0.20091  | -0.02723 | 0.256816 |
| NDUFAF2   | 0.177198 | 0.177407 | 0.0017   | 0.593888 |
| CACNA1E   | 0.4032   | 0.415117 | 0.042022 | 0.506944 |
| CNTN5     | 0.322045 | 0.342795 | 0.090081 | 0.06449  |
| TRDN      | 0.468265 | 0.573694 | 0.292957 | 0.034101 |
| EVI5L     | 0.448677 | 0.434627 | -0.0459  | 0.046758 |
| C14orf105 | 0.639647 | 0.610113 | -0.0682  | 0.076791 |
| GLTPD1    | 0.388233 | 0.392075 | 0.014206 | 0.436747 |
| PARN      | 0.381723 | 0.384544 | 0.010622 | 0.71991  |
| IL22RA2   | 0.293364 | 0.31152  | 0.086629 | 0.343297 |
| FOXS1     | 0.614073 | 0.582151 | -0.07702 | 0.034696 |
| OR1L3     | 0.206635 | 0.198739 | -0.05621 | 0.473277 |
| NUP210L   | 0.508751 | 0.526807 | 0.050315 | 0.33975  |
| MST1P9    | 0.683926 | 0.691832 | 0.016581 | 0.352863 |
| OR5AN1    | 0.24829  | 0.246022 | -0.01324 | 0.487761 |
| LRRC70    | 0.751594 | 0.773989 | 0.042359 | 0.150818 |
| PBLD      | 0.263828 | 0.260364 | -0.01907 | 0.651474 |
| IGSF10    | 0.567706 | 0.622174 | 0.132173 | 0.167353 |
| SNAR.H    | 0.816684 | 0.827541 | 0.019053 | 0.311107 |
| CLIC4     | 0.20404  | 0.201707 | -0.01659 | 0.404517 |
| ZNF705D   | 0.134162 | 0.131705 | -0.02667 | 0.600349 |
| GLTP      | 0.334547 | 0.334196 | -0.00152 | 0.885213 |
| COPB1     | 0.076858 | 0.071096 | -0.11242 | 0.338574 |
| C3orf74   | 0.63158  | 0.625729 | -0.01343 | 0.332728 |
| CCDC64B   | 0.120126 | 0.119182 | -0.01138 | 0.328103 |
| TUBG1     | 0.744005 | 0.748131 | 0.007977 | 0.300123 |
| CACNA1D   | 0.481375 | 0.472393 | -0.02717 | 0.254867 |
| FAM178B   | 0.55762  | 0.548214 | -0.02454 | 0.206108 |
| TMEM167F  | 0.152782 | 0.150968 | -0.01724 | 0.487761 |
| EFCAB3    | 0.311128 | 0.295386 | -0.07491 | 0.189103 |
| PROM2     | 0.79133  | 0.789095 | -0.00408 | 0.302297 |
| GLE1      | 0.34271  | 0.32922  | -0.05794 | 0.378779 |
| ART3      | 0.397899 | 0.427872 | 0.104778 | 0.087008 |
| NCRNA001  | 0.78453  | 0.860296 | 0.133004 | 0.005241 |
| OR8B3     | 0.540081 | 0.545007 | 0.013097 | 0.846756 |
| RPS8      | 0.305966 | 0.294935 | -0.05298 | 0.438123 |
| ZNF705G   | 0.568654 | 0.538204 | -0.0794  | 0.466124 |
| DNAH2     | 0.520299 | 0.502085 | -0.05141 | 0.470409 |
| UBR3      | 0.403373 | 0.414025 | 0.037602 | 0.221546 |
| DEK       | 0.092642 | 0.094212 | 0.024236 | 0.371255 |
| PPIE      | 0.199464 | 0.204142 | 0.033444 | 0.33273  |
| FCGR1A    | 0.46889  | 0.429703 | -0.12591 | 0.313352 |
| PPIA      | 0.087164 | 0.088736 | 0.025782 | 0.514423 |

|           |          |          |          |          |
|-----------|----------|----------|----------|----------|
| PAQR5     | 0.409131 | 0.403447 | -0.02018 | 0.618283 |
| CUZD1     | 0.785571 | 0.795941 | 0.018921 | 0.447802 |
| LRPPRC    | 0.25555  | 0.257714 | 0.012163 | 0.725143 |
| SYTL5     | 0.266589 | 0.275829 | 0.049158 | 0.489223 |
| TTC35     | 0.209237 | 0.215852 | 0.044902 | 0.056221 |
| SMAD1     | 0.185686 | 0.182027 | -0.02872 | 0.376261 |
| DMBX1     | 0.315292 | 0.303958 | -0.05282 | 0.179109 |
| HIST1H1C  | 0.042719 | 0.044192 | 0.048913 | 0.415092 |
| FTSJD2    | 0.285926 | 0.281792 | -0.02101 | 0.351659 |
| WDR20     | 0.597348 | 0.605988 | 0.020718 | 0.13374  |
| CST3      | 0.355226 | 0.352904 | -0.00946 | 0.368772 |
| EGFLAM    | 0.375908 | 0.376084 | 0.000677 | 0.733893 |
| APOBEC3F  | 0.579245 | 0.530267 | -0.12746 | 0.000922 |
| ANKS6     | 0.30366  | 0.296604 | -0.03392 | 0.401898 |
| GPR101    | 0.140779 | 0.156916 | 0.156566 | 0.212017 |
| SYT3      | 0.276541 | 0.273784 | -0.01445 | 0.34567  |
| WASF3     | 0.330423 | 0.327311 | -0.01365 | 0.949872 |
| MTERFD1   | 0.106863 | 0.108129 | 0.016996 | 0.505452 |
| SEC24A    | 0.072232 | 0.067468 | -0.09843 | 0.160302 |
| ODZ1      | 0.410607 | 0.410686 | 0.000275 | 0.466124 |
| SLC22A18  | 0.437672 | 0.428057 | -0.03205 | 0.27687  |
| VSX2      | 0.208705 | 0.203268 | -0.03808 | 0.202785 |
| PSD4      | 0.327788 | 0.333554 | 0.025155 | 0.821312 |
| VAMP1     | 0.186867 | 0.181215 | -0.04431 | 0.195455 |
| YARS      | 0.038051 | 0.039369 | 0.049136 | 0.188294 |
| APOA1BP   | 0.113449 | 0.103233 | -0.13614 | 0.043031 |
| C9orf98   | 0.340578 | 0.346611 | 0.025333 | 0.670033 |
| PLCB2     | 0.621568 | 0.597229 | -0.05763 | 0.046499 |
| LOC38879  | 0.406715 | 0.383438 | -0.08503 | 0.017439 |
| NKD2      | 0.508876 | 0.510663 | 0.005058 | 0.697388 |
| HAUS3     | 0.324537 | 0.321672 | -0.01279 | 0.258776 |
| CD47      | 0.395753 | 0.431268 | 0.123983 | 0.005919 |
| ZNF552    | 0.044173 | 0.046712 | 0.080617 | 0.079944 |
| ZNF544    | 0.119771 | 0.115807 | -0.04855 | 0.857711 |
| SNORD114  | 0.589454 | 0.641299 | 0.121617 | 0.139883 |
| SYK       | 0.4419   | 0.424865 | -0.05672 | 0.060877 |
| GOLGA7B   | 0.199874 | 0.196893 | -0.02168 | 0.611734 |
| TCTN2     | 0.104122 | 0.107629 | 0.047799 | 0.270743 |
| INVS      | 0.341024 | 0.345585 | 0.019167 | 0.380041 |
| CCNT2     | 0.220902 | 0.214903 | -0.03972 | 0.315593 |
| LOC64259  | 0.209692 | 0.199692 | -0.07049 | 0.271758 |
| C2orf58   | 0.546352 | 0.569018 | 0.058643 | 0.095021 |
| SGSM2     | 0.676673 | 0.671507 | -0.01106 | 0.349256 |
| C20orf7   | 0.094987 | 0.096204 | 0.018368 | 0.431275 |
| C14orf156 | 0.107287 | 0.103535 | -0.05135 | 0.143034 |
| OR4D6     | 0.087505 | 0.079736 | -0.13414 | 0.269732 |
| GALNT4    | 0.028964 | 0.028791 | -0.00864 | 0.868664 |
| MITF      | 0.544611 | 0.549331 | 0.012448 | 0.385113 |
| A2LD1     | 0.81171  | 0.802732 | -0.01605 | 0.130739 |
| SF3A2     | 0.777755 | 0.768875 | -0.01657 | 0.143027 |
| ZC3H7A    | 0.428359 | 0.430202 | 0.006194 | 0.693947 |
| ANGPTL7   | 0.892564 | 0.881411 | -0.01814 | 0.543357 |
| GPR3      | 0.09162  | 0.085356 | -0.10217 | 0.333892 |
| MIR23A    | 0.322043 | 0.28501  | -0.17624 | 0.225087 |
| SNORD36   | 0.777765 | 0.780741 | 0.00551  | 0.700835 |
| TUBB3     | 0.293613 | 0.297289 | 0.017949 | 0.563635 |

|           |          |          |          |          |
|-----------|----------|----------|----------|----------|
| NOTCH3    | 0.451007 | 0.442126 | -0.02869 | 0.227768 |
| MTFR1     | 0.138636 | 0.139633 | 0.010335 | 0.641438 |
| ARAP1     | 0.465332 | 0.451685 | -0.04294 | 0.034896 |
| SNX15     | 0.200152 | 0.193217 | -0.05087 | 0.148189 |
| CDK1      | 0.081463 | 0.079813 | -0.02951 | 0.385116 |
| AQP9      | 0.59075  | 0.555333 | -0.0892  | 0.001895 |
| SUSD3     | 0.325234 | 0.314183 | -0.04987 | 0.33157  |
| NOL7      | 0.123311 | 0.125436 | 0.024655 | 0.487761 |
| C2orf66   | 0.353594 | 0.348631 | -0.02039 | 0.726889 |
| GNB2      | 0.236685 | 0.234053 | -0.01614 | 0.537212 |
| OR7C2     | 0.184875 | 0.189827 | 0.038131 | 0.685369 |
| SCN2B     | 0.118612 | 0.106521 | -0.15511 | 0.048854 |
| TIGD6     | 0.822027 | 0.81773  | -0.00756 | 0.894414 |
| SPTBN5    | 0.464976 | 0.447697 | -0.05463 | 0.08035  |
| SNORD111  | 0.250665 | 0.242697 | -0.0466  | 0.44642  |
| NUDT7     | 0.049015 | 0.051606 | 0.074317 | 0.36014  |
| MUC6      | 0.511004 | 0.553733 | 0.115857 | 0.062826 |
| SLC5A11   | 0.362459 | 0.354101 | -0.03366 | 0.260743 |
| TC2N      | 0.124001 | 0.126268 | 0.026129 | 0.611735 |
| C8orf38   | 0.236187 | 0.243889 | 0.046297 | 0.210316 |
| PPM1D     | 0.086463 | 0.088544 | 0.034314 | 0.259754 |
| TSPAN14   | 0.436075 | 0.43058  | -0.0183  | 0.702561 |
| LARS      | 0.043561 | 0.044502 | 0.030858 | 0.227755 |
| SFRS11    | 0.203867 | 0.204897 | 0.00727  | 0.423142 |
| RAB41     | 0.737915 | 0.750858 | 0.025085 | 0.70775  |
| ZNF264    | 0.229119 | 0.238703 | 0.059119 | 0.122085 |
| RAB27B    | 0.126646 | 0.137606 | 0.119743 | 0.386393 |
| C10orf119 | 0.136106 | 0.137686 | 0.016654 | 0.408466 |
| GGA3      | 0.307831 | 0.307168 | -0.00311 | 0.872359 |
| ACTR2     | 0.189946 | 0.186041 | -0.02997 | 0.331567 |
| TAF8      | 0.060515 | 0.069503 | 0.199766 | 0.024495 |
| C17orf104 | 0.181103 | 0.189825 | 0.067858 | 0.053573 |
| TCP11L1   | 0.18292  | 0.185615 | 0.021101 | 0.371258 |
| NPBWR2    | 0.655495 | 0.62893  | -0.05969 | 0.001941 |
| C4orf36   | 0.269729 | 0.273342 | 0.019196 | 0.709484 |
| MGC23284  | 0.193193 | 0.195412 | 0.016476 | 0.552676 |
| KRBA1     | 0.562806 | 0.572646 | 0.025005 | 0.201139 |
| G6PC2     | 0.631724 | 0.618324 | -0.03093 | 0.198689 |
| NTS       | 0.265315 | 0.240645 | -0.1408  | 0.092287 |
| LOC38838  | 0.302934 | 0.316702 | 0.064122 | 0.434007 |
| CYBA      | 0.306286 | 0.315733 | 0.043825 | 0.457622 |
| ENO3      | 0.319013 | 0.308919 | -0.04638 | 0.218045 |
| CD37      | 0.20804  | 0.199596 | -0.05978 | 0.210315 |
| ZNF436    | 0.521646 | 0.550841 | 0.078566 | 0.001312 |
| PIH1D2    | 0.043743 | 0.041456 | -0.07746 | 0.199492 |
| ZSWIM3    | 0.109797 | 0.109382 | -0.00546 | 0.490684 |
| USPL1     | 0.096689 | 0.098291 | 0.023698 | 0.46328  |
| VPS37A    | 0.12824  | 0.130527 | 0.025501 | 0.282042 |
| COX4I2    | 0.422775 | 0.42499  | 0.007541 | 0.877865 |
| FRZB      | 0.111937 | 0.102946 | -0.12079 | 0.316716 |
| C16orf93  | 0.769988 | 0.784615 | 0.027149 | 0.048056 |
| TPTE2     | 0.26821  | 0.294687 | 0.135823 | 0.154832 |
| DYDC2     | 0.081171 | 0.077734 | -0.06242 | 0.128391 |
| SLC19A1   | 0.516367 | 0.511165 | -0.01461 | 0.360152 |
| LOC28537  | 0.605299 | 0.592758 | -0.03021 | 0.503967 |
| LOC10019  | 0.288677 | 0.2795   | -0.04661 | 0.030712 |

|            |          |          |          |          |
|------------|----------|----------|----------|----------|
| RHO        | 0.734241 | 0.725598 | -0.01708 | 0.470405 |
| DOM3Z      | 0.043381 | 0.044343 | 0.031649 | 0.332713 |
| MIR509.1   | 0.1588   | 0.159348 | 0.004972 | 0.935048 |
| SCAMP3     | 0.299747 | 0.305586 | 0.027831 | 0.380039 |
| VGLL1      | 0.658843 | 0.64688  | -0.02644 | 1        |
| CYC1       | 0.064062 | 0.065476 | 0.031511 | 0.506937 |
| RPL32      | 0.254654 | 0.245646 | -0.05196 | 0.205274 |
| PSG9       | 0.280822 | 0.30795  | 0.133041 | 0.056523 |
| GDF3       | 0.133085 | 0.130034 | -0.03345 | 0.67513  |
| PRG4       | 0.390705 | 0.404576 | 0.050329 | 0.460446 |
| NFIB       | 0.360524 | 0.34045  | -0.08265 | 0.023336 |
| SLC3A1     | 0.264488 | 0.270281 | 0.031258 | 0.077964 |
| PRRG1      | 0.084029 | 0.099154 | 0.238785 | 0.432637 |
| PNMA5      | 0.556532 | 0.550107 | -0.01675 | 0.979566 |
| GBE1       | 0.278962 | 0.283987 | 0.025757 | 0.434004 |
| HBII.52.46 | 0.575347 | 0.624619 | 0.118544 | 0.154832 |
| ASS1       | 0.48691  | 0.466536 | -0.06167 | 0.145595 |
| MAP4K4     | 0.419204 | 0.420512 | 0.004497 | 0.673428 |
| CCL16      | 0.416537 | 0.391143 | -0.09075 | 0.42045  |
| SRF        | 0.134831 | 0.132583 | -0.02425 | 0.476153 |
| GRK1       | 0.612929 | 0.626031 | 0.030516 | 0.756802 |
| SULT1A3    | 0.556819 | 0.567763 | 0.028082 | 0.342112 |
| SNORD46    | 0.076902 | 0.087233 | 0.181852 | 0.0012   |
| FAM58A     | 0.235414 | 0.251596 | 0.095909 | 0.206107 |
| BMP3       | 0.198546 | 0.203407 | 0.034899 | 0.601971 |
| PDXDC1     | 0.341225 | 0.328749 | -0.05374 | 0.098767 |
| ICAM4      | 0.174268 | 0.182473 | 0.066372 | 0.27687  |
| CCL27      | 0.755394 | 0.744236 | -0.02147 | 0.118192 |
| NLGN4X     | 0.386696 | 0.380535 | -0.02317 | 0.498043 |
| SLAMF7     | 0.147266 | 0.130238 | -0.17727 | 0.026487 |
| LOC10013   | 0.399424 | 0.408123 | 0.031084 | 0.332729 |
| FREQ       | 0.301944 | 0.295575 | -0.03076 | 0.20196  |
| UBE2E1     | 0.331239 | 0.332368 | 0.004908 | 0.763897 |
| MIR455     | 0.244888 | 0.239137 | -0.03428 | 0.621569 |
| CAT        | 0.108525 | 0.115189 | 0.085976 | 0.251963 |
| SELP       | 0.254909 | 0.272894 | 0.098357 | 0.293661 |
| KIAA1875   | 0.717134 | 0.715587 | -0.00311 | 0.589056 |
| HNRNPA3    | 0.677751 | 0.657154 | -0.04452 | 0.383844 |
| PITPNM3    | 0.261406 | 0.253279 | -0.04557 | 0.179109 |
| CDH11      | 0.537279 | 0.538263 | 0.002641 | 0.942457 |
| METTL11B   | 0.292038 | 0.33015  | 0.176964 | 0.040688 |
| C12orf75   | 0.188248 | 0.184548 | -0.02864 | 0.383844 |
| SCGB2A1    | 0.456776 | 0.444809 | -0.0383  | 0.439499 |
| FLJ35024   | 0.318767 | 0.313361 | -0.02468 | 0.21631  |
| NCRNA000   | 0.850254 | 0.843989 | -0.01067 | 1        |
| PAGE1      | 0.268096 | 0.318083 | 0.246655 | 0.047016 |
| RGS11      | 0.448517 | 0.471789 | 0.07298  | 0.042317 |
| TSNAXIP1   | 0.076267 | 0.076576 | 0.005838 | 0.671728 |
| CLCF1      | 0.206749 | 0.174994 | -0.24057 | 0.072619 |
| APOA2      | 0.685607 | 0.663561 | -0.04715 | 0.234114 |
| MAPK1      | 0.128155 | 0.131985 | 0.04248  | 0.103122 |
| PARD6A     | 0.38812  | 0.396581 | 0.031115 | 0.232287 |
| ZNF518B    | 0.335339 | 0.348679 | 0.056278 | 0.352867 |
| LOC39975   | 0.506587 | 0.486402 | -0.05866 | 0.119298 |
| CASC1      | 0.074115 | 0.068969 | -0.1038  | 0.082383 |
| SPAG17     | 0.105442 | 0.106888 | 0.019638 | 0.636448 |

|          |          |          |          |          |
|----------|----------|----------|----------|----------|
| KDM5B    | 0.147404 | 0.148693 | 0.012563 | 0.555798 |
| NEURL3   | 0.233624 | 0.217512 | -0.10309 | 0.106109 |
| MT1M     | 0.167204 | 0.155515 | -0.10456 | 0.240583 |
| C7orf60  | 0.182728 | 0.186435 | 0.028977 | 0.343297 |
| MTPN     | 0.27015  | 0.259537 | -0.05782 | 0.278931 |
| DENND1A  | 0.557809 | 0.555907 | -0.00493 | 0.4647   |
| CD300LF  | 0.393918 | 0.324673 | -0.27891 | 0.003373 |
| ZNF167   | 0.431413 | 0.431862 | 0.001501 | 0.725143 |
| PAGE2B   | 0.544932 | 0.578331 | 0.085821 | 0.150158 |
| IL7      | 0.310047 | 0.33825  | 0.125604 | 0.021552 |
| TMEM86A  | 0.148369 | 0.148465 | 0.000931 | 0.687081 |
| LRTM2    | 0.567435 | 0.567515 | 0.000202 | 0.762121 |
| USF2     | 0.312731 | 0.310281 | -0.01135 | 0.610103 |
| C1orf229 | 0.203372 | 0.194765 | -0.06239 | 0.023765 |
| CYP2D7P1 | 0.66875  | 0.674726 | 0.012835 | 0.271755 |
| CCND3    | 0.323745 | 0.323334 | -0.00183 | 0.636446 |
| CD97     | 0.395008 | 0.397339 | 0.008489 | 0.959146 |
| EPB41L4B | 0.330205 | 0.328501 | -0.00746 | 0.808658 |
| FBXO40   | 0.383016 | 0.409013 | 0.094745 | 0.199504 |
| XYLT1    | 0.425915 | 0.417692 | -0.02812 | 0.266712 |
| LOC64151 | 0.132158 | 0.138179 | 0.064281 | 0.297964 |
| SLAMF1   | 0.167246 | 0.157154 | -0.08979 | 0.532615 |
| GIGYF2   | 0.337572 | 0.343714 | 0.026013 | 0.416434 |
| KIR2DL1  | 0.304667 | 0.315565 | 0.050705 | 0.306695 |
| FAM63A   | 0.191283 | 0.193408 | 0.015933 | 0.180621 |
| SNORA35  | 0.623607 | 0.598636 | -0.05896 | 0.610102 |
| ATG9B    | 0.342607 | 0.330701 | -0.05103 | 0.052713 |
| C22orf40 | 0.167708 | 0.171485 | 0.032129 | 0.278932 |
| NSFL1C   | 0.160542 | 0.161049 | 0.004547 | 0.543372 |
| OR1A1    | 0.321754 | 0.335545 | 0.060549 | 0.397988 |
| ZMAT1    | 0.30727  | 0.31244  | 0.024068 | 0.417771 |
| METRNL   | 0.433638 | 0.447597 | 0.04571  | 0.363831 |
| RNASE9   | 0.457694 | 0.406518 | -0.17106 | 0.158236 |
| DENND5B  | 0.300735 | 0.304685 | 0.018825 | 0.38767  |
| FAM18A   | 0.351906 | 0.339197 | -0.05307 | 0.013849 |
| TMEM134  | 0.082905 | 0.087569 | 0.078959 | 0.633125 |
| H2BFM    | 0.448006 | 0.464695 | 0.052766 | 0.399289 |
| MTMR2    | 0.313952 | 0.321733 | 0.035321 | 0.531086 |
| FOXF2    | 0.125048 | 0.118911 | -0.0726  | 0.188319 |
| OR4F6    | 0.625438 | 0.600139 | -0.05957 | 0.477596 |
| KLHL29   | 0.655608 | 0.648258 | -0.01627 | 0.224194 |
| FOXO3    | 0.335212 | 0.338014 | 0.012007 | 0.544918 |
| LOC25431 | 0.756607 | 0.754587 | -0.00386 | 0.861367 |
| COPS7B   | 0.193127 | 0.189518 | -0.02721 | 0.407146 |
| RERG     | 0.063598 | 0.060373 | -0.07509 | 0.695665 |
| PRKD2    | 0.397433 | 0.392313 | -0.01871 | 0.725142 |
| DOK2     | 0.695004 | 0.666707 | -0.05997 | 0.017883 |
| FGD3     | 0.406387 | 0.394801 | -0.04173 | 0.113344 |
| CYP26C1  | 0.482362 | 0.533772 | 0.146108 | 0.098767 |
| NOTO     | 0.134605 | 0.126784 | -0.08636 | 0.13926  |
| LOC10013 | 0.289049 | 0.307776 | 0.090565 | 0.438123 |
| CAV1     | 0.140687 | 0.139659 | -0.01058 | 0.881538 |
| BEX5     | 0.167849 | 0.180175 | 0.102232 | 0.521966 |
| GSTO2    | 0.112203 | 0.10935  | -0.03716 | 0.344481 |
| KDELC2   | 0.280421 | 0.275433 | -0.02589 | 0.41911  |
| ALG6     | 0.224265 | 0.22563  | 0.00876  | 0.562062 |

|           |          |          |          |          |
|-----------|----------|----------|----------|----------|
| PCDH9     | 0.294381 | 0.31398  | 0.092989 | 0.017771 |
| DEAF1     | 0.64821  | 0.638615 | -0.02151 | 0.082384 |
| RARA      | 0.266077 | 0.267442 | 0.007385 | 0.992569 |
| C4orf10   | 0.385115 | 0.379035 | -0.02296 | 0.242453 |
| FANCG     | 0.350917 | 0.347376 | -0.01463 | 0.330411 |
| C1orf141  | 0.642512 | 0.630064 | -0.02822 | 0.434002 |
| PCDHB16   | 0.400326 | 0.416686 | 0.057785 | 0.356497 |
| C6orf134  | 0.373354 | 0.389186 | 0.059915 | 0.082796 |
| CBL       | 0.244043 | 0.241668 | -0.01411 | 0.986996 |
| SIPA1     | 0.389268 | 0.383845 | -0.02024 | 0.408468 |
| PABPC1    | 0.329063 | 0.334317 | 0.022852 | 0.192258 |
| MIR1288   | 0.90163  | 0.906972 | 0.008524 | 0.676816 |
| JAK2      | 0.510603 | 0.506869 | -0.01059 | 0.544917 |
| LOC15019  | 0.3507   | 0.341582 | -0.038   | 0.145594 |
| GAP43     | 0.360186 | 0.368792 | 0.034066 | 0.385117 |
| SH3GL2    | 0.320837 | 0.319262 | -0.0071  | 0.769228 |
| C8orf33   | 0.197883 | 0.197246 | -0.00466 | 0.9369   |
| WIT1      | 0.08857  | 0.085136 | -0.05705 | 0.540286 |
| OSM       | 0.696006 | 0.682208 | -0.02889 | 0.57628  |
| C20orf56  | 0.108225 | 0.103613 | -0.06283 | 0.460444 |
| LY75      | 0.401355 | 0.429126 | 0.096523 | 0.290462 |
| TRIM24    | 0.204533 | 0.208225 | 0.025806 | 0.224196 |
| SFRS2     | 0.093566 | 0.089153 | -0.06969 | 0.392809 |
| C3orf20   | 0.562138 | 0.550312 | -0.03067 | 0.061196 |
| SPATA8    | 0.774421 | 0.737463 | -0.07055 | 0.082796 |
| CDKN2BAS  | 0.186378 | 0.152226 | -0.29202 | 0.091389 |
| CYP2C9    | 0.255703 | 0.249584 | -0.03494 | 0.639773 |
| MMP28     | 0.373416 | 0.36306  | -0.04057 | 0.18444  |
| DIRC1     | 0.507729 | 0.589005 | 0.214223 | 0.010153 |
| CYP4F8    | 0.154652 | 0.154056 | -0.00558 | 0.653153 |
| AADAC     | 0.592035 | 0.635636 | 0.102518 | 0.008746 |
| ZNF627    | 0.225596 | 0.220553 | -0.03262 | 0.500999 |
| HIST1H2AI | 0.060297 | 0.058495 | -0.04378 | 0.996284 |
| SGCZ      | 0.343247 | 0.359579 | 0.067059 | 0.065847 |
| GRK4      | 0.208305 | 0.203644 | -0.03265 | 0.355284 |
| SNORD35   | 0.34184  | 0.328894 | -0.0557  | 0.156867 |
| PLAA      | 0.029631 | 0.028513 | -0.05552 | 0.415047 |
| L3MBTL4   | 0.343705 | 0.336769 | -0.02941 | 0.680243 |
| ANKS1A    | 0.459253 | 0.455864 | -0.01069 | 0.428553 |
| RNASE1    | 0.259162 | 0.269106 | 0.054317 | 0.796055 |
| WDYHV1    | 0.246594 | 0.242355 | -0.02502 | 0.543372 |
| HES6      | 0.220617 | 0.200262 | -0.13966 | 0.034101 |
| TERC      | 0.11704  | 0.104793 | -0.15946 | 0.057128 |
| AIMP1     | 0.132004 | 0.132352 | 0.003797 | 0.955435 |
| MAGI2     | 0.338425 | 0.33897  | 0.002323 | 0.970282 |
| CPXCR1    | 0.185654 | 0.19792  | 0.092304 | 0.375008 |
| BMS1      | 0.093444 | 0.092038 | -0.02186 | 0.600347 |
| MAP1D     | 0.52309  | 0.557794 | 0.092674 | 0.062498 |
| CXCL5     | 0.22549  | 0.237632 | 0.075665 | 0.500999 |
| KCTD1     | 0.347003 | 0.345259 | -0.00727 | 0.473275 |
| OASL      | 0.170006 | 0.165792 | -0.03621 | 0.543373 |
| NGLY1     | 0.111872 | 0.109766 | -0.02742 | 0.648118 |
| NOMO3     | 0.2223   | 0.21947  | -0.01848 | 0.62651  |
| FYB       | 0.311484 | 0.325665 | 0.064232 | 0.429915 |
| MAP3K4    | 0.285227 | 0.287724 | 0.012579 | 0.758575 |
| NAALADL2  | 0.216827 | 0.244272 | 0.171945 | 0.008627 |

|           |          |          |          |          |
|-----------|----------|----------|----------|----------|
| IGFBP6    | 0.320488 | 0.302021 | -0.08563 | 0.203613 |
| KRTAP12.1 | 0.105066 | 0.098285 | -0.09626 | 0.150819 |
| TBC1D23   | 0.145865 | 0.148829 | 0.029016 | 0.123212 |
| SKP1      | 0.132876 | 0.129536 | -0.03673 | 0.506944 |
| OR5AU1    | 0.217556 | 0.225164 | 0.049589 | 0.824936 |
| SLC25A14  | 0.199809 | 0.216497 | 0.115724 | 0.155507 |
| C5orf42   | 0.433988 | 0.438194 | 0.013912 | 0.471841 |
| C12orf45  | 0.049353 | 0.046998 | -0.07055 | 0.467537 |
| CMTM2     | 0.234609 | 0.232102 | -0.0155  | 0.966569 |
| EIF6      | 0.086528 | 0.092193 | 0.091491 | 0.021027 |
| PIAS2     | 0.293967 | 0.301012 | 0.034164 | 0.290461 |
| MIR100    | 0.390129 | 0.395414 | 0.019413 | 0.585853 |
| STYXL1    | 0.142742 | 0.143467 | 0.007306 | 0.721654 |
| GAGE2D    | 0.4772   | 0.556136 | 0.220843 | 0.059605 |
| TNNI3     | 0.173276 | 0.155816 | -0.15323 | 0.060556 |
| CYBRD1    | 0.142579 | 0.13788  | -0.04835 | 0.360152 |
| ECHS1     | 0.326555 | 0.326977 | 0.001863 | 0.712953 |
| CEACAM8   | 0.360568 | 0.345849 | -0.06013 | 0.543373 |
| ZCCHC8    | 0.198452 | 0.20476  | 0.045143 | 0.203612 |
| HCRT      | 0.458691 | 0.47209  | 0.041538 | 0.746201 |
| SC5DL     | 0.19077  | 0.194255 | 0.026119 | 0.311123 |
| TFDP1     | 0.706041 | 0.699062 | -0.01433 | 0.318969 |
| KLRD1     | 0.604246 | 0.603177 | -0.00255 | 0.271758 |
| TBX10     | 0.401574 | 0.41428  | 0.04494  | 0.436747 |
| GPR84     | 0.685068 | 0.637757 | -0.10324 | 0.001002 |
| MGAM      | 0.55913  | 0.579198 | 0.050874 | 0.443644 |
| GGCX      | 0.20486  | 0.202899 | -0.01388 | 0.806855 |
| C19orf50  | 0.194575 | 0.190343 | -0.03172 | 0.141136 |
| C16orf65  | 0.043506 | 0.043622 | 0.003845 | 0.707737 |
| PSMC3     | 0.169262 | 0.167467 | -0.01538 | 0.938752 |
| MIR29C    | 0.754298 | 0.741532 | -0.02463 | 0.04351  |
| KLHL36    | 0.524706 | 0.509435 | -0.04261 | 0.179108 |
| OGFOD1    | 0.087035 | 0.08503  | -0.03362 | 0.238721 |
| POLR1E    | 0.13957  | 0.131859 | -0.082   | 0.100202 |
| SPATS2L   | 0.473769 | 0.492775 | 0.056744 | 0.041612 |
| HSD11B1L  | 0.25526  | 0.263904 | 0.048048 | 0.50993  |
| MS4A5     | 0.36094  | 0.36128  | 0.001358 | 0.571524 |
| ZNF250    | 0.159236 | 0.157671 | -0.01425 | 0.844932 |
| C3orf52   | 0.256534 | 0.240529 | -0.09294 | 0.004062 |
| NFASC     | 0.616254 | 0.608682 | -0.01784 | 0.095018 |
| ZNF821    | 0.405557 | 0.404439 | -0.00398 | 0.901785 |
| ZNF509    | 0.287459 | 0.281342 | -0.03103 | 0.331569 |
| ATAD3C    | 0.436264 | 0.455563 | 0.062447 | 0.33975  |
| C20orf96  | 0.275007 | 0.28296  | 0.04113  | 0.316718 |
| MIR196A2  | 0.213515 | 0.206537 | -0.04794 | 0.443644 |
| GDF9      | 0.667217 | 0.663365 | -0.00835 | 0.597109 |
| GPX6      | 0.10431  | 0.105239 | 0.012787 | 0.957291 |
| CACNG2    | 0.368617 | 0.359317 | -0.03687 | 0.102139 |
| HYLS1     | 0.261867 | 0.275062 | 0.070924 | 0.057128 |
| MAPKSP1   | 0.114045 | 0.12258  | 0.104124 | 0.023765 |
| C1orf61   | 0.415687 | 0.382402 | -0.12041 | 0.009174 |
| CCDC23    | 0.037096 | 0.044273 | 0.255177 | 0.025393 |
| ZCCHC3    | 0.091829 | 0.102543 | 0.159211 | 0.008988 |
| C1orf26   | 0.260599 | 0.253799 | -0.03815 | 0.349255 |
| SLC25A22  | 0.51707  | 0.52724  | 0.028099 | 0.187539 |
| GPR135    | 0.140484 | 0.145856 | 0.05413  | 0.351658 |

|          |          |          |          |          |
|----------|----------|----------|----------|----------|
| THBS2    | 0.36849  | 0.407314 | 0.144515 | 0.066881 |
| KLHDC4   | 0.57155  | 0.57092  | -0.00159 | 0.747963 |
| FGF13    | 0.276455 | 0.295294 | 0.095106 | 0.153486 |
| GSTA4    | 0.067096 | 0.064696 | -0.05255 | 0.881537 |
| LCN2     | 0.500576 | 0.482656 | -0.05259 | 0.062497 |
| DNAJC7   | 0.245903 | 0.24007  | -0.03463 | 0.260745 |
| FAAH2    | 0.069339 | 0.069413 | 0.001547 | 0.95729  |
| CBLB     | 0.26312  | 0.266231 | 0.016958 | 0.385117 |
| FLJ20184 | 0.411894 | 0.496073 | 0.268279 | 0.001517 |
| LOC39059 | 0.541535 | 0.545872 | 0.011507 | 0.440876 |
| AGBL5    | 0.1944   | 0.196904 | 0.018462 | 0.299045 |
| ELP4     | 0.231173 | 0.232014 | 0.005235 | 0.631471 |
| RASL10A  | 0.114811 | 0.118101 | 0.040757 | 0.199503 |
| PMS1     | 0.321145 | 0.326508 | 0.023892 | 0.376262 |
| SIGLEC10 | 0.49211  | 0.473445 | -0.05578 | 0.328103 |
| C6orf25  | 0.62747  | 0.644238 | 0.038046 | 0.088302 |
| CYP2F1   | 0.289773 | 0.302226 | 0.060706 | 0.511427 |
| PLEKHH1  | 0.394401 | 0.394853 | 0.00165  | 0.892573 |
| B4GALNT2 | 0.155967 | 0.152773 | -0.02985 | 0.683659 |
| RPL11    | 0.084474 | 0.08514  | 0.011333 | 0.451993 |
| ELL2     | 0.37083  | 0.36983  | -0.00389 | 0.737403 |
| DKFZp434 | 0.265778 | 0.258416 | -0.04053 | 0.876029 |
| ABCB4    | 0.332586 | 0.337748 | 0.022217 | 0.416433 |
| TBX2     | 0.180138 | 0.167737 | -0.1029  | 0.256818 |
| C14orf45 | 0.157578 | 0.160548 | 0.026934 | 0.442259 |
| MYBPC2   | 0.288016 | 0.272104 | -0.08199 | 0.118748 |
| KRTAP9.3 | 0.606019 | 0.569096 | -0.09069 | 0.423143 |
| ARSK     | 0.161611 | 0.162364 | 0.006708 | 0.82131  |
| OR5L1    | 0.273223 | 0.28784  | 0.075187 | 0.697389 |
| S100A4   | 0.601898 | 0.593631 | -0.01995 | 0.287287 |
| CHST15   | 0.777872 | 0.76648  | -0.02128 | 0.069695 |
| LOC28455 | 0.373986 | 0.374576 | 0.002277 | 0.452001 |
| PGLS     | 0.292048 | 0.285756 | -0.03142 | 0.238722 |
| IDE      | 0.175271 | 0.174598 | -0.00555 | 0.959146 |
| USH2A    | 0.592498 | 0.628843 | 0.085889 | 0.011679 |
| OR6M1    | 0.2526   | 0.253254 | 0.00373  | 0.964713 |
| PTPRQ    | 0.294459 | 0.313977 | 0.092591 | 0.168069 |
| UPK3A    | 0.160417 | 0.132501 | -0.27582 | 0.002414 |
| FAM151B  | 0.026051 | 0.02798  | 0.103065 | 0.142329 |
| RRAGB    | 0.202419 | 0.206849 | 0.031233 | 0.51593  |
| IQCB1    | 0.180332 | 0.18049  | 0.001267 | 0.762121 |
| UBQLN4   | 0.379619 | 0.386875 | 0.027315 | 0.158923 |
| MIR202   | 0.715067 | 0.689109 | -0.05335 | 0.163798 |
| NEURL1B  | 0.547713 | 0.554279 | 0.017192 | 0.235028 |
| RHAG     | 0.226119 | 0.272678 | 0.270119 | 0.043756 |
| RPLP0P2  | 0.495549 | 0.467232 | -0.08489 | 0.001794 |
| SEC23B   | 0.166016 | 0.168406 | 0.020625 | 0.732138 |
| 2.Mar    | 0.351632 | 0.341626 | -0.04165 | 0.09319  |
| REXO1L2P | 0.53486  | 0.541556 | 0.017949 | 0.551121 |
| DCAF4L2  | 0.756285 | 0.800002 | 0.081073 | 0.26371  |
| KIN      | 0.150812 | 0.149717 | -0.0105  | 0.785293 |
| HRH1     | 0.376245 | 0.385072 | 0.033455 | 0.270744 |
| LRCH4    | 0.363782 | 0.360654 | -0.01246 | 0.765673 |
| MIAT     | 0.036422 | 0.047332 | 0.378    | 0.336171 |
| ZBBX     | 0.232934 | 0.253659 | 0.122969 | 0.008988 |
| C11orf92 | 0.403971 | 0.391625 | -0.04478 | 0.170961 |

|          |          |          |          |          |
|----------|----------|----------|----------|----------|
| SFRP1    | 0.406668 | 0.398212 | -0.03031 | 0.611735 |
| TMEM85   | 0.134396 | 0.136678 | 0.024291 | 0.246224 |
| SH2D3A   | 0.219353 | 0.226939 | 0.049052 | 0.383845 |
| XKRX     | 0.293082 | 0.293419 | 0.00166  | 0.985138 |
| RPP25    | 0.156352 | 0.131691 | -0.24764 | 0.207785 |
| PRICKLE1 | 0.36908  | 0.365336 | -0.01471 | 0.771009 |
| ADIG     | 0.576272 | 0.595492 | 0.047334 | 0.020642 |
| MAP3K10  | 0.415495 | 0.412942 | -0.00889 | 0.574694 |
| OCIAD1   | 0.038952 | 0.038799 | -0.00567 | 0.933191 |
| KIF2B    | 0.875539 | 0.853778 | -0.03631 | 0.189074 |
| DNAJC5G  | 0.69603  | 0.709639 | 0.027936 | 0.415099 |
| ZMYND15  | 0.267785 | 0.267486 | -0.00161 | 1        |
| LOC34105 | 0.648303 | 0.621714 | -0.06042 | 0.016788 |
| OR8G2    | 0.33188  | 0.308803 | -0.10398 | 0.19226  |
| NCRNA00  | 0.515244 | 0.466236 | -0.1442  | 0.074115 |
| THEM4    | 0.117901 | 0.122233 | 0.052066 | 0.085304 |
| SNORA62  | 0.83421  | 0.818089 | -0.02815 | 0.013757 |
| PLSCR5   | 0.216724 | 0.213996 | -0.01828 | 0.70602  |
| MIR548A1 | 0.78167  | 0.832899 | 0.091581 | 0.176851 |
| CUTC     | 0.284851 | 0.280705 | -0.02116 | 0.765673 |
| KRT17    | 0.595983 | 0.573063 | -0.05658 | 0.215444 |
| HEATR7B2 | 0.43611  | 0.465003 | 0.092548 | 0.318974 |
| BDP1     | 0.088741 | 0.088925 | 0.002989 | 0.663257 |
| PNOC     | 0.507202 | 0.519207 | 0.03375  | 0.431276 |
| C10orf82 | 0.498231 | 0.477244 | -0.06209 | 0.252929 |
| SNORD11f | 0.505001 | 0.500139 | -0.01396 | 0.76923  |
| 7.Mar    | 0.162429 | 0.164386 | 0.017282 | 0.443643 |
| RPS6     | 0.115937 | 0.101732 | -0.18856 | 0.036743 |
| TBC1D15  | 0.218283 | 0.231759 | 0.086429 | 0.027452 |
| FAM98C   | 0.083255 | 0.087396 | 0.070027 | 0.162395 |
| FLJ32063 | 0.118798 | 0.115007 | -0.04678 | 0.758573 |
| ANKHD1   | 0.05059  | 0.049335 | -0.03625 | 0.663257 |
| FANCF    | 0.123399 | 0.126629 | 0.037275 | 0.350457 |
| LEF1     | 0.177217 | 0.169424 | -0.06488 | 0.403208 |
| SLC25A46 | 0.142666 | 0.145342 | 0.026811 | 0.255841 |
| TMEM200  | 0.487361 | 0.566155 | 0.216206 | 0.025397 |
| APOL5    | 0.564817 | 0.550772 | -0.03633 | 0.193054 |
| CST1     | 0.64624  | 0.643557 | -0.006   | 0.863199 |
| TLX3     | 0.110184 | 0.12308  | 0.159688 | 0.26173  |
| CGB1     | 0.37275  | 0.369643 | -0.01207 | 0.964713 |
| EEF1E1   | 0.209425 | 0.208664 | -0.00525 | 0.709483 |
| PRIM2    | 0.265064 | 0.278098 | 0.069256 | 0.02077  |
| ABCB7    | 0.161483 | 0.15608  | -0.04909 | 0.704291 |
| RBMS2    | 0.404849 | 0.389251 | -0.05668 | 0.079549 |
| ADRA1D   | 0.230819 | 0.222746 | -0.05136 | 0.411114 |
| NPC1L1   | 0.67236  | 0.690159 | 0.037694 | 0.027615 |
| C9orf142 | 0.146492 | 0.151575 | 0.049215 | 0.408467 |
| MTA2     | 0.164235 | 0.158961 | -0.04708 | 0.409789 |
| BST2     | 0.482712 | 0.509013 | 0.076542 | 0.287287 |
| FAM38B   | 0.275934 | 0.257011 | -0.10249 | 0.267718 |
| DARC     | 0.48902  | 0.513347 | 0.070041 | 0.058047 |
| C8orf83  | 0.222229 | 0.228566 | 0.040563 | 0.202787 |
| PRDM5    | 0.223655 | 0.232892 | 0.058385 | 0.315591 |
| GATAD2A  | 0.457542 | 0.453976 | -0.01129 | 0.511424 |
| PADI2    | 0.134555 | 0.131808 | -0.02976 | 0.814075 |
| CLEC3A   | 0.67714  | 0.656677 | -0.04427 | 0.216309 |

|          |          |          |          |          |
|----------|----------|----------|----------|----------|
| GRAMD2   | 0.373842 | 0.376131 | 0.008806 | 0.548016 |
| ARL6IP5  | 0.302078 | 0.30223  | 0.000728 | 0.899941 |
| TMUB2    | 0.160907 | 0.160914 | 6.27E-05 | 0.981423 |
| HSPB7    | 0.465405 | 0.471436 | 0.018575 | 0.457619 |
| INSL4    | 0.398593 | 0.426248 | 0.096776 | 0.176859 |
| CYTH2    | 0.192405 | 0.199011 | 0.048697 | 0.292592 |
| SLC25A16 | 0.143878 | 0.151456 | 0.074046 | 0.026015 |
| GALNT10  | 0.227572 | 0.218347 | -0.0597  | 0.022497 |
| ALDH9A1  | 0.087277 | 0.088774 | 0.024527 | 0.597113 |
| GLIPR1   | 0.118412 | 0.115835 | -0.03174 | 0.693946 |
| TMEM59   | 0.099366 | 0.10054  | 0.01694  | 0.489218 |
| CPSF3L   | 0.611386 | 0.612974 | 0.003742 | 0.728639 |
| GYPC     | 0.417772 | 0.469347 | 0.167941 | 0.093192 |
| LOC34892 | 0.190585 | 0.185882 | -0.03605 | 0.446417 |
| SUCLA2   | 0.105928 | 0.115976 | 0.130739 | 0.079547 |
| C1QTNF9  | 0.604109 | 0.62638  | 0.052228 | 0.423142 |
| SLFN14   | 0.302053 | 0.285794 | -0.07983 | 0.201962 |
| SPIRE2   | 0.612133 | 0.603907 | -0.01952 | 0.197874 |
| RB1CC1   | 0.104308 | 0.106452 | 0.029341 | 0.323516 |
| RAMP1    | 0.42589  | 0.417934 | -0.02721 | 0.166637 |
| LMO7     | 0.527056 | 0.544814 | 0.047805 | 0.016368 |
| PSMA1    | 0.191789 | 0.195168 | 0.025196 | 0.170961 |
| PCK1     | 0.476276 | 0.432436 | -0.13931 | 0.017884 |
| APBA3    | 0.66751  | 0.661275 | -0.01354 | 0.275839 |
| BEST4    | 0.461824 | 0.450609 | -0.03547 | 0.038672 |
| CLDN2    | 0.382972 | 0.374993 | -0.03037 | 0.828563 |
| BBS12    | 0.206833 | 0.178355 | -0.21372 | 0.015553 |
| FLI1     | 0.427195 | 0.386137 | -0.14578 | 0.000985 |
| DCAF11   | 0.043982 | 0.044395 | 0.013495 | 0.216295 |
| C21orf49 | 0.140277 | 0.15181  | 0.113985 | 0.016789 |
| C2orf71  | 0.481055 | 0.486382 | 0.015889 | 0.331571 |
| MGC16703 | 0.412113 | 0.417003 | 0.017016 | 0.435375 |
| UGT2B4   | 0.472246 | 0.54718  | 0.212476 | 0.030893 |
| IFFO1    | 0.393254 | 0.396623 | 0.012306 | 0.725143 |
| PLCH2    | 0.656094 | 0.646874 | -0.02042 | 0.348056 |
| C13orf38 | 0.100755 | 0.103823 | 0.043267 | 0.819501 |
| MIR1276  | 0.87621  | 0.869886 | -0.01045 | 0.220652 |
| C1orf227 | 0.454209 | 0.455895 | 0.005346 | 0.837649 |
| FLJ32810 | 0.273305 | 0.301837 | 0.143259 | 0.027616 |
| MATN2    | 0.357691 | 0.358149 | 0.001846 | 0.983281 |
| ARC      | 0.196036 | 0.186046 | -0.07545 | 0.143033 |
| SFPQ     | 0.07806  | 0.07873  | 0.012333 | 0.502475 |
| ZNF341   | 0.260508 | 0.265083 | 0.025114 | 0.348059 |
| CXCL1    | 0.088446 | 0.094302 | 0.092497 | 0.268725 |
| NIPBL    | 0.186906 | 0.189303 | 0.018381 | 0.548015 |
| SH2D1A   | 0.615727 | 0.583636 | -0.07722 | 0.233197 |
| ARHGEF7  | 0.534617 | 0.534446 | -0.00046 | 0.953581 |
| TMEM61   | 0.221761 | 0.222477 | 0.00465  | 0.938752 |
| CLDN11   | 0.414546 | 0.431056 | 0.056342 | 0.335059 |
| WNK4     | 0.16003  | 0.167117 | 0.062511 | 0.262725 |
| BNC1     | 0.175737 | 0.158948 | -0.14486 | 0.165924 |
| SLC47A2  | 0.686166 | 0.669641 | -0.03517 | 0.006817 |
| C1orf93  | 0.112113 | 0.115269 | 0.040047 | 0.253896 |
| KRT82    | 0.624504 | 0.600028 | -0.05768 | 0.107118 |
| C14orf37 | 0.298681 | 0.286016 | -0.06251 | 0.065165 |
| CC2D1A   | 0.362035 | 0.364366 | 0.009261 | 0.755033 |

|          |          |          |          |          |
|----------|----------|----------|----------|----------|
| THAP4    | 0.504386 | 0.505668 | 0.003664 | 0.76212  |
| ALX4     | 0.188984 | 0.18138  | -0.05925 | 0.274817 |
| C6orf147 | 0.181055 | 0.197008 | 0.121829 | 0.295808 |
| ATOX1A   | 0.229783 | 0.219068 | -0.06889 | 0.114945 |
| IRX4     | 0.079974 | 0.085024 | 0.088344 | 0.031622 |
| ATP5J    | 0.097521 | 0.100694 | 0.046189 | 0.168786 |
| KLK4     | 0.227759 | 0.23547  | 0.048034 | 0.506945 |
| CCDC17   | 0.648284 | 0.667913 | 0.043034 | 0.007159 |
| GSDMA    | 0.609844 | 0.598017 | -0.02826 | 0.363829 |
| TUBA4B   | 0.092661 | 0.074572 | -0.31332 | 0.278932 |
| RPP30    | 0.196673 | 0.19657  | -0.00076 | 0.812268 |
| LCT      | 0.783099 | 0.778149 | -0.00915 | 0.130154 |
| MRPL48   | 0.320834 | 0.329075 | 0.036592 | 0.324661 |
| PHLDA2   | 0.045823 | 0.046292 | 0.014699 | 0.600346 |
| CLN3     | 0.172198 | 0.168928 | -0.02766 | 0.554236 |
| RAPGEF4  | 0.469989 | 0.470587 | 0.001835 | 0.888892 |
| CCDC84   | 0.152011 | 0.153835 | 0.017212 | 0.285179 |
| FBXW4    | 0.567711 | 0.568656 | 0.002401 | 0.779928 |
| FXR1     | 0.079076 | 0.067846 | -0.22098 | 0.040687 |
| XIRP2    | 0.774978 | 0.794917 | 0.03665  | 0.048321 |
| C17orf85 | 0.601109 | 0.605584 | 0.0107   | 0.608471 |
| KCTD18   | 0.355564 | 0.353544 | -0.00822 | 0.778142 |
| PITPNM2  | 0.720978 | 0.709456 | -0.02324 | 0.011755 |
| C8orf86  | 0.491345 | 0.502744 | 0.033087 | 0.111762 |
| ZNF232   | 0.171593 | 0.175121 | 0.029368 | 0.502482 |
| CD101    | 0.674077 | 0.676267 | 0.004681 | 0.810462 |
| ENC1     | 0.214261 | 0.209018 | -0.03574 | 0.424492 |
| RGNEF    | 0.463118 | 0.454939 | -0.02571 | 0.22331  |
| CKAP2L   | 0.057177 | 0.055906 | -0.03244 | 0.844929 |
| HRH4     | 0.16597  | 0.160881 | -0.04493 | 0.799651 |
| MYO5A    | 0.163568 | 0.166245 | 0.023417 | 0.267718 |
| SCFD1    | 0.139495 | 0.14218  | 0.027503 | 0.476154 |
| ID2      | 0.119494 | 0.115086 | -0.05423 | 0.387667 |
| ARNT2    | 0.562966 | 0.564752 | 0.004569 | 0.638108 |
| FAM103A1 | 0.137878 | 0.135717 | -0.02279 | 0.656514 |
| PTH      | 0.337539 | 0.360122 | 0.093433 | 0.333895 |
| C9orf86  | 0.633923 | 0.624638 | -0.02129 | 0.144309 |
| ZNF624   | 0.233162 | 0.225058 | -0.05104 | 0.343295 |
| TUBB4Q   | 0.53269  | 0.545755 | 0.034958 | 0.179861 |
| RPP40    | 0.153045 | 0.159971 | 0.063862 | 0.048059 |
| EZH1     | 0.10796  | 0.107718 | -0.00324 | 0.923944 |
| TGFB111  | 0.404388 | 0.391173 | -0.04793 | 0.173891 |
| OR4K2    | 0.289216 | 0.297685 | 0.041642 | 0.440878 |
| C10orf72 | 0.464685 | 0.446107 | -0.05886 | 0.041148 |
| NEUROD4  | 0.327901 | 0.302222 | -0.11765 | 0.053573 |
| BRD1     | 0.631937 | 0.63999  | 0.018269 | 0.587455 |
| YTHDF3   | 0.08336  | 0.084452 | 0.018778 | 0.305592 |
| PCDH21   | 0.49924  | 0.495982 | -0.00945 | 0.636447 |
| TTC37    | 0.022843 | 0.023005 | 0.010201 | 0.824901 |
| SYT16    | 0.423548 | 0.465404 | 0.135959 | 0.062497 |
| ZFAND6   | 0.244071 | 0.246653 | 0.015182 | 0.479041 |
| C12orf43 | 0.153973 | 0.152228 | -0.01644 | 0.733893 |
| RNF2     | 0.26378  | 0.270629 | 0.036982 | 0.098766 |
| TPMT     | 0.076329 | 0.07908  | 0.051071 | 0.119296 |
| GUCY1A2  | 0.236188 | 0.253702 | 0.103201 | 0.011526 |
| TMEM69   | 0.073196 | 0.059788 | -0.29192 | 0.170229 |

|          |          |          |          |          |
|----------|----------|----------|----------|----------|
| MRPL32   | 0.098541 | 0.099741 | 0.017467 | 0.427197 |
| LGALS1   | 0.382375 | 0.358898 | -0.09141 | 0.072619 |
| FLJ39653 | 0.425532 | 0.428855 | 0.011225 | 0.451998 |
| FLJ44817 | 0.252131 | 0.239284 | -0.07545 | 0.031623 |
| EXD1     | 0.830967 | 0.84497  | 0.024109 | 0.747962 |
| CYP4F2   | 0.285159 | 0.308008 | 0.111199 | 0.320105 |
| MTIF3    | 0.14095  | 0.14301  | 0.020941 | 0.301215 |
| DNMT1    | 0.431487 | 0.425039 | -0.02172 | 0.222428 |
| EPHA7    | 0.120187 | 0.123656 | 0.041051 | 0.156185 |
| TGM7     | 0.531854 | 0.519599 | -0.03363 | 0.874194 |
| CCNA2    | 0.091129 | 0.092574 | 0.0227   | 0.500998 |
| C11orf53 | 0.518905 | 0.48633  | -0.09353 | 0.208626 |
| C15orf33 | 0.258445 | 0.259912 | 0.008162 | 0.91101  |
| CBLN2    | 0.236716 | 0.220528 | -0.1022  | 0.051307 |
| LOC64367 | 0.562764 | 0.608925 | 0.113733 | 0.00012  |
| LACTB    | 0.172677 | 0.174796 | 0.017593 | 0.794259 |
| FAM41AY2 | 0.425306 | 0.365312 | -0.21937 | 0.289274 |
| UBR1     | 0.154625 | 0.159962 | 0.048962 | 0.200321 |
| HIST1H2A | 0.176274 | 0.171544 | -0.03924 | 0.385118 |
| TRIM42   | 0.657271 | 0.647452 | -0.02171 | 0.241512 |
| MIR26B   | 0.867702 | 0.869585 | 0.003127 | 0.973994 |
| PDLIM1   | 0.379932 | 0.365429 | -0.05615 | 0.050205 |
| ADAMDEC  | 0.5648   | 0.572262 | 0.018935 | 0.992569 |
| C2orf90  | 0.788588 | 0.762904 | -0.04777 | 0.028442 |
| XDH      | 0.609218 | 0.605883 | -0.00792 | 0.606844 |
| CNOT2    | 0.186797 | 0.19376  | 0.052799 | 0.216311 |
| FTSJ3    | 0.117343 | 0.116234 | -0.01371 | 0.755032 |
| RPL13    | 0.150319 | 0.137412 | -0.12952 | 0.039558 |
| TRIM58   | 0.063845 | 0.067148 | 0.072772 | 0.19545  |
| DKK2     | 0.102563 | 0.110416 | 0.106446 | 0.118198 |
| NKX3.2   | 0.133898 | 0.138949 | 0.053422 | 0.403207 |
| SAMD8    | 0.21355  | 0.214126 | 0.00389  | 0.673428 |
| DLX1     | 0.101669 | 0.094592 | -0.10409 | 0.021953 |
| NPTX2    | 0.348562 | 0.336737 | -0.04979 | 0.165926 |
| PTEN     | 0.106691 | 0.114352 | 0.100034 | 0.193054 |
| CCDC123  | 0.220856 | 0.216534 | -0.02852 | 0.429913 |
| BZW2     | 0.168251 | 0.170796 | 0.021656 | 0.401897 |
| WFIKKN1  | 0.520735 | 0.480149 | -0.11707 | 0.002414 |
| ATP6V1B1 | 0.299252 | 0.305904 | 0.031721 | 0.457622 |
| FAM24A   | 0.335485 | 0.328122 | -0.03202 | 0.239652 |
| NT5C3    | 0.243154 | 0.246703 | 0.020905 | 0.503968 |
| LAYN     | 0.231662 | 0.221126 | -0.06715 | 0.06449  |
| RGL2     | 0.408609 | 0.415671 | 0.024719 | 0.254867 |
| MBD3L5   | 0.518464 | 0.526372 | 0.02184  | 0.753264 |
| STAG1    | 0.23533  | 0.238985 | 0.022235 | 0.573106 |
| SNORD116 | 0.693306 | 0.705247 | 0.024636 | 0.22331  |
| NDUFA1   | 0.172072 | 0.183253 | 0.090827 | 0.58106  |
| HEATR5B  | 0.172378 | 0.174319 | 0.016157 | 0.857711 |
| SEBOX    | 0.810222 | 0.814616 | 0.007802 | 0.549564 |
| C1orf92  | 0.371105 | 0.33824  | -0.13378 | 0.077572 |
| ZCCHC5   | 0.374196 | 0.404657 | 0.112903 | 0.331571 |
| BTBD18   | 0.572897 | 0.58858  | 0.038962 | 0.20947  |
| SEPN1    | 0.271596 | 0.268761 | -0.01514 | 0.502479 |
| ZNF187   | 0.251578 | 0.249111 | -0.01422 | 0.837648 |
| SNAR.G1  | 0.484494 | 0.493193 | 0.025673 | 0.832195 |
| MMGT1    | 0.283716 | 0.285887 | 0.010999 | 0.700837 |

|           |          |          |          |          |
|-----------|----------|----------|----------|----------|
| KIF2A     | 0.282854 | 0.288725 | 0.029641 | 0.365061 |
| MPZ       | 0.273984 | 0.243018 | -0.17303 | 0.082798 |
| FANCM     | 0.155752 | 0.161208 | 0.049673 | 0.368772 |
| CHCHD3    | 0.363988 | 0.366978 | 0.0118   | 0.590668 |
| 2.Sep     | 0.095987 | 0.096874 | 0.013266 | 0.467548 |
| COCH      | 0.23342  | 0.239664 | 0.038082 | 0.77101  |
| SRD5A3    | 0.285114 | 0.278501 | -0.03386 | 0.13075  |
| TIMELESS  | 0.165763 | 0.159692 | -0.05383 | 0.484843 |
| HOXD8     | 0.120556 | 0.101608 | -0.24669 | 0.056824 |
| SPC25     | 0.119581 | 0.114573 | -0.06173 | 0.149499 |
| BMP1      | 0.512773 | 0.504759 | -0.02273 | 0.189102 |
| MCF2      | 0.242449 | 0.259434 | 0.097687 | 0.029823 |
| KIAA2018  | 0.306818 | 0.306535 | -0.00133 | 0.85771  |
| MCOLN1    | 0.118944 | 0.119804 | 0.010395 | 0.560491 |
| TREM2     | 0.427628 | 0.455748 | 0.091881 | 0.128393 |
| ZNF749    | 0.217027 | 0.210973 | -0.04082 | 0.329256 |
| L3MBTL3   | 0.280391 | 0.290556 | 0.051375 | 0.054153 |
| HSPG2     | 0.589818 | 0.591913 | 0.005115 | 0.420449 |
| TRAPPC2P  | 0.058477 | 0.060207 | 0.042051 | 0.270733 |
| PHF5A     | 0.155447 | 0.146656 | -0.08399 | 0.051866 |
| KIAA1383  | 0.21634  | 0.238513 | 0.140771 | 0.099722 |
| ZMYND10   | 0.225826 | 0.247698 | 0.133374 | 0.457622 |
| RDM1      | 0.334538 | 0.332526 | -0.0087  | 0.400593 |
| SH3TC2    | 0.534379 | 0.52683  | -0.02053 | 0.366295 |
| OR2L3     | 0.230928 | 0.203869 | -0.1798  | 0.131344 |
| IL12RB2   | 0.359211 | 0.358921 | -0.00117 | 0.624862 |
| TIMM23    | 0.225748 | 0.229969 | 0.026723 | 0.348058 |
| CXADRP2   | 0.119681 | 0.107609 | -0.15339 | 0.141768 |
| RHOBTB3   | 0.274264 | 0.268111 | -0.03273 | 0.208625 |
| OVOL1     | 0.242666 | 0.253701 | 0.064155 | 0.331571 |
| DHRS2     | 0.061861 | 0.066133 | 0.096357 | 0.431275 |
| OR4A15    | 0.180042 | 0.183794 | 0.029756 | 0.760348 |
| ACTG2     | 0.310876 | 0.303985 | -0.03234 | 0.447811 |
| C6orf123  | 0.478258 | 0.467055 | -0.0342  | 0.495094 |
| RHOC      | 0.249397 | 0.241009 | -0.04936 | 0.210316 |
| SCARNA12  | 0.482728 | 0.47831  | -0.01326 | 0.571524 |
| LOC44166  | 0.222887 | 0.220517 | -0.01542 | 0.953581 |
| HES3      | 0.401956 | 0.374805 | -0.1009  | 0.167353 |
| CALHM2    | 0.449452 | 0.437002 | -0.04052 | 0.268725 |
| C20orf177 | 0.291585 | 0.293247 | 0.008199 | 0.71991  |
| EMP1      | 0.442854 | 0.42412  | -0.06236 | 0.041148 |
| FAM18B    | 0.084618 | 0.081897 | -0.04715 | 0.558925 |
| UNC93A    | 0.608877 | 0.594233 | -0.03512 | 0.314471 |
| CXCR7     | 0.514761 | 0.504758 | -0.02831 | 0.301216 |
| DPY19L1   | 0.282139 | 0.288459 | 0.031958 | 0.163097 |
| OXSM      | 0.250691 | 0.244411 | -0.0366  | 0.496566 |
| MGC87042  | 0.264125 | 0.259938 | -0.02305 | 0.33975  |
| GHRHR     | 0.642463 | 0.610476 | -0.07368 | 0.000641 |
| KLB       | 0.555978 | 0.586598 | 0.077345 | 0.068632 |
| MRGPRF    | 0.499207 | 0.477663 | -0.06365 | 0.017549 |
| BDH2      | 0.20574  | 0.199585 | -0.04382 | 0.2332   |
| MIR1973   | 0.683454 | 0.696139 | 0.026531 | 0.243395 |
| LIN52     | 0.106333 | 0.106858 | 0.007108 | 0.515928 |
| PGM5P2    | 0.341697 | 0.340993 | -0.00298 | 0.877864 |
| MS4A6A    | 0.263957 | 0.301967 | 0.194088 | 0.084462 |
| LST1      | 0.39571  | 0.349194 | -0.18041 | 0.030354 |

|           |          |          |          |          |
|-----------|----------|----------|----------|----------|
| IL16      | 0.503028 | 0.497644 | -0.01552 | 0.746202 |
| RNF126    | 0.421186 | 0.41821  | -0.01023 | 0.603592 |
| CASS4     | 0.685874 | 0.715804 | 0.061622 | 0.002322 |
| LOC34050  | 0.464491 | 0.476674 | 0.037353 | 0.440878 |
| FOXP4     | 0.434727 | 0.398127 | -0.12688 | 0.009299 |
| TAF4      | 0.56245  | 0.556522 | -0.01528 | 0.165925 |
| CECR7     | 0.22756  | 0.219828 | -0.04987 | 0.435377 |
| PKD2L2    | 0.357115 | 0.374971 | 0.070393 | 0.095483 |
| DCAF16    | 0.432019 | 0.421249 | -0.03642 | 0.346863 |
| C21orf45  | 0.078897 | 0.082594 | 0.066082 | 0.301213 |
| ATP6V0E2  | 0.186182 | 0.184602 | -0.01229 | 0.590667 |
| MT3       | 0.095251 | 0.095267 | 0.000254 | 0.788876 |
| RP2       | 0.141866 | 0.161792 | 0.189611 | 0.385117 |
| PCSK1     | 0.166195 | 0.164868 | -0.01156 | 0.558927 |
| TSPY3     | 0.542015 | 0.499205 | -0.1187  | 0.568342 |
| ST3GAL2   | 0.311883 | 0.308787 | -0.01439 | 0.566784 |
| CKAP4     | 0.394033 | 0.39849  | 0.016225 | 0.348059 |
| ENPP5     | 0.106684 | 0.108722 | 0.027305 | 0.671728 |
| ANXA8     | 0.774517 | 0.710207 | -0.12506 | 0.045738 |
| LRP4      | 0.194985 | 0.187928 | -0.05318 | 0.484845 |
| SGK2      | 0.603373 | 0.590963 | -0.02998 | 0.097346 |
| C17orf89  | 0.177041 | 0.173669 | -0.02774 | 0.732141 |
| CCDC74B   | 0.405349 | 0.368045 | -0.13928 | 0.002066 |
| NRXN1     | 0.392814 | 0.391737 | -0.00396 | 0.73214  |
| FRAT1     | 0.1139   | 0.124363 | 0.126793 | 0.361374 |
| LOC15038  | 0.512443 | 0.420186 | -0.28636 | 0.035098 |
| SNF8      | 0.172864 | 0.172426 | -0.00367 | 0.979566 |
| AICDA     | 0.321169 | 0.341538 | 0.088714 | 0.23503  |
| RNF25     | 0.269061 | 0.266765 | -0.01236 | 0.535676 |
| PSMB1     | 0.102658 | 0.103754 | 0.015322 | 0.521962 |
| JAZF1     | 0.497432 | 0.498281 | 0.002459 | 0.972138 |
| POU2F1    | 0.267275 | 0.27024  | 0.015915 | 0.737403 |
| FATE1     | 0.273451 | 0.270563 | -0.01532 | 0.933197 |
| PPIC      | 0.114331 | 0.110327 | -0.05143 | 0.209467 |
| C14orf169 | 0.493661 | 0.487191 | -0.01903 | 0.69051  |
| GJA5      | 0.429673 | 0.391263 | -0.1351  | 0.086152 |
| UBXN10    | 0.335202 | 0.327835 | -0.03206 | 0.896256 |
| OLFML2A   | 0.395532 | 0.390782 | -0.01743 | 0.323516 |
| ATP6V0A2  | 0.209187 | 0.212731 | 0.024238 | 0.511425 |
| MIR127    | 0.872839 | 0.87257  | -0.00044 | 0.535666 |
| C14orf118 | 0.256947 | 0.253532 | -0.0193  | 0.587456 |
| TMEM63C   | 0.320913 | 0.317667 | -0.01467 | 0.526515 |
| MIR1179   | 0.419326 | 0.395069 | -0.08597 | 0.421797 |
| HNRNPH2   | 0.197285 | 0.209365 | 0.085738 | 0.077964 |
| SLC25A39  | 0.099284 | 0.100461 | 0.016991 | 0.573106 |
| VAMP4     | 0.149277 | 0.150278 | 0.009649 | 0.597114 |
| COMMD1C   | 0.246536 | 0.250566 | 0.023395 | 0.413768 |
| NLGN2     | 0.710866 | 0.724756 | 0.027918 | 0.139257 |
| OR2Y1     | 0.359912 | 0.368379 | 0.033548 | 0.619925 |
| CLTA      | 0.323299 | 0.320155 | -0.0141  | 0.427197 |
| SCRIB     | 0.597218 | 0.589049 | -0.01987 | 0.188317 |
| MIR190    | 0.8761   | 0.866143 | -0.01649 | 0.089608 |
| PABPC1L   | 0.102688 | 0.108047 | 0.073389 | 0.090943 |
| FAM131C   | 0.305603 | 0.286974 | -0.09074 | 0.000636 |
| MIR599    | 0.7159   | 0.781253 | 0.126032 | 0.042316 |
| GF11      | 0.139851 | 0.138474 | -0.01428 | 0.901785 |

|           |          |          |          |          |
|-----------|----------|----------|----------|----------|
| EFHC1     | 0.170553 | 0.168934 | -0.01377 | 0.996284 |
| NKX2.5    | 0.140477 | 0.131255 | -0.09796 | 0.521964 |
| PSMD5     | 0.193419 | 0.196445 | 0.022394 | 0.796055 |
| COBRA1    | 0.428201 | 0.421089 | -0.02417 | 0.403205 |
| PDK2      | 0.320137 | 0.317587 | -0.01154 | 0.638109 |
| WBP5      | 0.154282 | 0.139892 | -0.14126 | 0.073363 |
| HFE       | 0.568052 | 0.569193 | 0.002894 | 0.737402 |
| C10orf90  | 0.467347 | 0.453974 | -0.04188 | 0.877865 |
| TSTA3     | 0.451717 | 0.446893 | -0.01549 | 0.495091 |
| GPR174    | 0.549487 | 0.566452 | 0.043868 | 0.629815 |
| VEZF1     | 0.143873 | 0.148659 | 0.047208 | 0.352865 |
| HERC2     | 0.775601 | 0.769577 | -0.01125 | 0.214575 |
| TRPM7     | 0.189539 | 0.19405  | 0.033933 | 0.546464 |
| RPH3AL    | 0.540089 | 0.536452 | -0.00975 | 0.279967 |
| HIST1H3E  | 0.234858 | 0.249794 | 0.088949 | 0.51593  |
| GPS1      | 0.512719 | 0.51608  | 0.009425 | 0.673428 |
| ACTRT2    | 0.544926 | 0.564292 | 0.050382 | 0.532615 |
| RGPD2     | 0.681168 | 0.692243 | 0.023267 | 0.535674 |
| MEPE      | 0.271657 | 0.283248 | 0.060277 | 0.308902 |
| DEF8      | 0.427218 | 0.42573  | -0.00503 | 0.531087 |
| SAPS3     | 0.171297 | 0.173616 | 0.019401 | 0.259758 |
| CHRNA5    | 0.150646 | 0.137197 | -0.13491 | 0.012723 |
| MRPL44    | 0.308882 | 0.302364 | -0.03077 | 0.349258 |
| MDM2      | 0.10049  | 0.100782 | 0.004181 | 0.962857 |
| DDR2      | 0.661913 | 0.63663  | -0.05619 | 0.166637 |
| KIAA0174  | 0.234504 | 0.236815 | 0.014146 | 0.373755 |
| PPAP2C    | 0.440944 | 0.437117 | -0.01258 | 0.587457 |
| OR10A6    | 0.550036 | 0.583152 | 0.084346 | 0.253898 |
| COL20A1   | 0.451106 | 0.467534 | 0.051605 | 0.322378 |
| KIAA1324L | 0.355736 | 0.357509 | 0.007173 | 0.71991  |
| AKIRIN2   | 0.37168  | 0.380062 | 0.032174 | 0.276869 |
| MOBK1B    | 0.118555 | 0.119928 | 0.01661  | 0.587457 |
| MIR662    | 0.341983 | 0.342646 | 0.002793 | 0.649797 |
| SNORD116  | 0.670425 | 0.676473 | 0.012955 | 0.66495  |
| HDHD2     | 0.091384 | 0.096918 | 0.084828 | 0.015061 |
| TRPV4     | 0.458135 | 0.430097 | -0.09111 | 0.021289 |
| AARSD1    | 0.126758 | 0.12594  | -0.00935 | 0.610101 |
| ANG       | 0.155098 | 0.156178 | 0.010014 | 0.740918 |
| KLF16     | 0.256436 | 0.248087 | -0.04776 | 0.144311 |
| KRT24     | 0.288073 | 0.273521 | -0.07478 | 0.518943 |
| C6orf35   | 0.368907 | 0.370798 | 0.007378 | 0.470408 |
| ADAMTS5   | 0.246244 | 0.265744 | 0.109949 | 0.186762 |
| FAT4      | 0.147855 | 0.159314 | 0.107691 | 0.078357 |
| CELA3B    | 0.640721 | 0.623499 | -0.03931 | 0.185982 |
| DSCR8     | 0.05529  | 0.057577 | 0.058484 | 0.294733 |
| C22orf41  | 0.166529 | 0.155557 | -0.09833 | 0.099243 |
| BTG4      | 0.435803 | 0.417627 | -0.06146 | 0.06619  |
| C8orf51   | 0.235345 | 0.218077 | -0.10994 | 0.105607 |
| U2AF1     | 0.2658   | 0.261095 | -0.02577 | 0.368772 |
| LOC10014  | 0.04407  | 0.043705 | -0.01201 | 0.671718 |
| HCFC2     | 0.114025 | 0.116875 | 0.035611 | 0.308898 |
| DTNBP1    | 0.39237  | 0.390292 | -0.00766 | 0.888892 |
| MIR671    | 0.506556 | 0.520376 | 0.038832 | 0.395394 |
| FGA       | 0.360107 | 0.392931 | 0.125852 | 0.180621 |
| GCNT7     | 0.572712 | 0.569212 | -0.00884 | 0.4506   |
| ATF6B     | 0.41173  | 0.416789 | 0.017619 | 0.358931 |

|          |          |          |          |          |
|----------|----------|----------|----------|----------|
| GHDC     | 0.163284 | 0.1579   | -0.04837 | 0.147537 |
| POM121L5 | 0.609319 | 0.606355 | -0.00703 | 0.95358  |
| TECR     | 0.316344 | 0.306704 | -0.04464 | 0.213727 |
| TAPT1    | 0.509506 | 0.517008 | 0.021088 | 0.282042 |
| CERK     | 0.594225 | 0.586502 | -0.01887 | 0.321238 |
| TG       | 0.449319 | 0.440029 | -0.03014 | 0.231379 |
| ALKBH1   | 0.130812 | 0.129608 | -0.01334 | 0.656514 |
| ERMN     | 0.538937 | 0.535441 | -0.00939 | 0.683659 |
| KRT1     | 0.464534 | 0.406079 | -0.19403 | 0.018804 |
| PMM2     | 0.473916 | 0.481861 | 0.023984 | 0.174629 |
| SLC25A45 | 0.149532 | 0.144561 | -0.04877 | 0.628163 |
| TMEM52   | 0.348979 | 0.346775 | -0.00914 | 0.534144 |
| PKM2     | 0.256102 | 0.25315  | -0.01672 | 0.659882 |
| APOBEC4  | 0.423536 | 0.399279 | -0.08509 | 0.246228 |
| FIGF     | 0.684162 | 0.696452 | 0.025686 | 0.301217 |
| NPY6R    | 0.651088 | 0.6437   | -0.01646 | 0.460443 |
| LOC20278 | 0.563005 | 0.557902 | -0.01314 | 0.859539 |
| ZNF721   | 0.228931 | 0.221881 | -0.04513 | 0.305594 |
| C19orf10 | 0.118256 | 0.117466 | -0.00967 | 0.763896 |
| PAQR3    | 0.182031 | 0.18254  | 0.004032 | 0.543372 |
| PHLPP2   | 0.590844 | 0.60791  | 0.041081 | 0.162395 |
| KIF3C    | 0.215772 | 0.224783 | 0.059027 | 0.111763 |
| C7orf54  | 0.397345 | 0.452803 | 0.188493 | 0.00124  |
| TEX13B   | 0.578708 | 0.562262 | -0.04159 | 0.487761 |
| DUSP5P   | 0.258727 | 0.258072 | -0.00366 | 0.863199 |
| ST8SIA5  | 0.422808 | 0.410825 | -0.04148 | 0.065847 |
| IGFBP5   | 0.361518 | 0.330741 | -0.12836 | 0.005794 |
| KIF22    | 0.23313  | 0.234579 | 0.008941 | 0.70429  |
| FOXN3    | 0.508509 | 0.507416 | -0.00311 | 0.810463 |
| NT5C2    | 0.357756 | 0.365912 | 0.032519 | 0.344483 |
| HAUS5    | 0.185174 | 0.182772 | -0.01884 | 0.302307 |
| IL9      | 0.668491 | 0.622899 | -0.10191 | 0.01029  |
| RASGRF2  | 0.454538 | 0.462867 | 0.026197 | 0.34448  |
| HIST1H1A | 0.727301 | 0.748835 | 0.042095 | 0.178355 |
| MYH7B    | 0.514878 | 0.495653 | -0.0549  | 0.044986 |
| ACSL1    | 0.405329 | 0.40625  | 0.003275 | 0.909164 |
| CD5L     | 0.367146 | 0.329494 | -0.1561  | 0.18989  |
| CGB2     | 0.251691 | 0.245711 | -0.03469 | 0.479042 |
| MTHFSD   | 0.458962 | 0.456292 | -0.00842 | 0.67513  |
| DOHH     | 0.307643 | 0.304861 | -0.01311 | 0.664949 |
| FLJ30058 | 0.556759 | 0.536282 | -0.05406 | 0.268724 |
| PPIL1    | 0.269088 | 0.26798  | -0.00595 | 0.57628  |
| KIAA1143 | 0.204739 | 0.209664 | 0.034294 | 0.204443 |
| CASZ1    | 0.551086 | 0.549738 | -0.00353 | 0.454804 |
| BECN1    | 0.020304 | 0.020468 | 0.011606 | 0.628042 |
| OR13J1   | 0.504407 | 0.507628 | 0.009184 | 0.687082 |
| SNORD93  | 0.433399 | 0.474458 | 0.130586 | 0.242455 |
| RNF13    | 0.254389 | 0.261997 | 0.042512 | 0.218042 |
| PLCXD3   | 0.226522 | 0.237189 | 0.066388 | 0.258776 |
| VNN3     | 0.201156 | 0.216177 | 0.1039   | 0.249086 |
| MIR494   | 0.839857 | 0.844923 | 0.008677 | 0.616636 |
| OR6C3    | 0.35891  | 0.321142 | -0.16041 | 0.169511 |
| AZI1     | 0.64141  | 0.627631 | -0.03133 | 0.010782 |
| ZNF782   | 0.287866 | 0.288741 | 0.004379 | 0.626512 |
| MIR518D  | 0.157197 | 0.175484 | 0.158762 | 0.060238 |
| TTC23    | 0.393459 | 0.385866 | -0.02811 | 0.505454 |

|           |          |          |          |          |
|-----------|----------|----------|----------|----------|
| CHST13    | 0.250001 | 0.254043 | 0.023141 | 0.543372 |
| ATG2B     | 0.396893 | 0.394913 | -0.00722 | 0.498042 |
| SDHAP3    | 0.306168 | 0.288667 | -0.08492 | 0.207783 |
| KIAA1486  | 0.390622 | 0.381477 | -0.03418 | 0.243395 |
| RASAL3    | 0.187465 | 0.182773 | -0.03657 | 0.361375 |
| ALDH3A2   | 0.197337 | 0.201802 | 0.032279 | 0.200318 |
| ACN9      | 0.215242 | 0.223111 | 0.051801 | 0.177604 |
| GPRIN3    | 0.532171 | 0.543946 | 0.031574 | 0.235949 |
| SIGLEC6   | 0.066844 | 0.069221 | 0.050412 | 0.771008 |
| TEKT2     | 0.544962 | 0.54769  | 0.007204 | 0.788876 |
| DAGLB     | 0.43986  | 0.440301 | 0.001447 | 0.848579 |
| MKRN3     | 0.432965 | 0.482816 | 0.157226 | 0.040688 |
| LOC64575  | 0.370634 | 0.365151 | -0.0215  | 0.442259 |
| NCRNA000  | 0.174403 | 0.194892 | 0.160248 | 0.109164 |
| SHANK2    | 0.566968 | 0.564692 | -0.0058  | 0.584252 |
| LOC28520  | 0.195507 | 0.197899 | 0.017543 | 0.994427 |
| MUTYH     | 0.184976 | 0.187689 | 0.021005 | 0.154155 |
| TMIGD1    | 0.50253  | 0.484494 | -0.05273 | 0.204443 |
| GEMIN4    | 0.680878 | 0.687145 | 0.013218 | 0.634785 |
| ARSG      | 0.304271 | 0.318935 | 0.067907 | 0.111762 |
| C15orf38  | 0.268608 | 0.251685 | -0.09388 | 0.132538 |
| ARL16     | 0.19929  | 0.200427 | 0.00821  | 0.788877 |
| MIR320B1  | 0.465062 | 0.4445   | -0.06524 | 0.011298 |
| OR51T1    | 0.361011 | 0.37235  | 0.044617 | 0.711218 |
| CST8      | 0.730932 | 0.759486 | 0.055286 | 0.877864 |
| MIR126    | 0.459171 | 0.474808 | 0.048312 | 0.490687 |
| NDUFAB1   | 0.153955 | 0.155293 | 0.012485 | 0.386393 |
| TMX4      | 0.195223 | 0.198313 | 0.022658 | 0.306694 |
| LOC33879  | 0.067954 | 0.067718 | -0.00501 | 0.532612 |
| MAP2K4    | 0.341048 | 0.346447 | 0.022662 | 0.351659 |
| AMH       | 0.57439  | 0.632649 | 0.139375 | 0.030712 |
| CCL3      | 0.244499 | 0.232153 | -0.07475 | 0.409789 |
| GCDH      | 0.135877 | 0.130306 | -0.0604  | 0.193055 |
| TRAPPC9   | 0.555699 | 0.55442  | -0.00332 | 0.435372 |
| HAUS4     | 0.309459 | 0.304479 | -0.0234  | 0.474714 |
| LOC10013  | 0.786046 | 0.774286 | -0.02175 | 0.219787 |
| DHRS9     | 0.461274 | 0.436438 | -0.07985 | 0.052429 |
| KRTAP19.5 | 0.258693 | 0.262531 | 0.021242 | 0.792464 |
| PPDPF     | 0.171849 | 0.169469 | -0.02012 | 0.518943 |
| CLDN17    | 0.430857 | 0.443576 | 0.041973 | 0.742678 |
| FAM47B    | 0.491039 | 0.547372 | 0.156684 | 0.05103  |
| GPM6A     | 0.276498 | 0.278943 | 0.012701 | 0.365063 |
| RASA3     | 0.533475 | 0.563645 | 0.079366 | 0.084461 |
| COL3A1    | 0.518174 | 0.59679  | 0.203787 | 0.001088 |
| TRIM14    | 0.392889 | 0.400421 | 0.027397 | 0.303401 |
| SNORA10   | 0.749508 | 0.687956 | -0.12363 | 0.000149 |
| C17orf49  | 0.080438 | 0.084837 | 0.076817 | 0.141132 |
| MIR548D1  | 0.455271 | 0.44961  | -0.01805 | 0.72689  |
| CAPSL     | 0.365105 | 0.323106 | -0.1763  | 0.062826 |
| DCI       | 0.529877 | 0.527968 | -0.00521 | 0.523478 |
| IFT80     | 0.052129 | 0.047669 | -0.12902 | 0.02982  |
| CTSG      | 0.27493  | 0.278261 | 0.017377 | 0.60035  |
| DNAH1     | 0.422085 | 0.405398 | -0.0582  | 0.077964 |
| PRSS22    | 0.227277 | 0.214171 | -0.08569 | 0.138637 |
| DNAH14    | 0.191741 | 0.202186 | 0.076522 | 0.059606 |
| NRK       | 0.115846 | 0.132984 | 0.199044 | 0.238722 |

|           |          |          |          |          |
|-----------|----------|----------|----------|----------|
| ALKBH5    | 0.16919  | 0.169994 | 0.006845 | 0.955435 |
| WNK1      | 0.300315 | 0.303143 | 0.013523 | 0.695666 |
| KRTAP12.3 | 0.436705 | 0.497147 | 0.187014 | 0.034696 |
| LOC38933  | 0.170043 | 0.1684   | -0.014   | 0.946164 |
| NLRX1     | 0.60616  | 0.588398 | -0.0429  | 0.160305 |
| DDX60     | 0.131688 | 0.139601 | 0.084177 | 0.185212 |
| NKPD1     | 0.277287 | 0.298594 | 0.106806 | 0.14431  |
| KAAG1     | 0.580603 | 0.522116 | -0.15318 | 0.129566 |
| MN1       | 0.264537 | 0.239848 | -0.14135 | 0.006004 |
| GOLGA7    | 0.126993 | 0.12741  | 0.004735 | 0.436747 |
| NBEAL2    | 0.373921 | 0.367166 | -0.0263  | 0.12781  |
| KRTAP23.1 | 0.408896 | 0.419348 | 0.036417 | 0.844932 |
| TRIM66    | 0.439334 | 0.431224 | -0.02688 | 0.310012 |
| TTPAL     | 0.162372 | 0.167367 | 0.043712 | 0.138017 |
| LOC10013  | 0.232811 | 0.236311 | 0.021528 | 0.534145 |
| KIF13A    | 0.361751 | 0.365887 | 0.016401 | 0.823122 |
| XAGE3     | 0.408486 | 0.385722 | -0.08273 | 0.186762 |
| TIGD4     | 0.357005 | 0.367133 | 0.04036  | 0.147537 |
| DHX35     | 0.206062 | 0.200712 | -0.03795 | 0.273794 |
| FBXO47    | 0.304947 | 0.346509 | 0.184333 | 0.180619 |
| VN1R2     | 0.059303 | 0.050322 | -0.23693 | 0.03653  |
| OR52A5    | 0.447559 | 0.485481 | 0.117339 | 0.34093  |
| COL6A1    | 0.620613 | 0.617063 | -0.00828 | 0.778142 |
| KDM1A     | 0.163125 | 0.165969 | 0.024934 | 0.483389 |
| SGCB      | 0.194243 | 0.198849 | 0.033807 | 0.15148  |
| GATM      | 0.14584  | 0.138898 | -0.07035 | 0.66326  |
| HOXB4     | 0.099123 | 0.097242 | -0.02764 | 0.569938 |
| TMEM67    | 0.092327 | 0.093071 | 0.011576 | 0.419104 |
| IL28A     | 0.264833 | 0.237584 | -0.15664 | 0.111763 |
| C9orf7    | 0.299355 | 0.302257 | 0.013916 | 0.463279 |
| OXCT1     | 0.314048 | 0.332289 | 0.081451 | 0.109163 |
| MIR377    | 0.746951 | 0.756501 | 0.018328 | 0.224186 |
| PRKAG1    | 0.212711 | 0.209802 | -0.01986 | 0.579465 |
| HIST1H2A  | 0.048932 | 0.050217 | 0.037391 | 0.898097 |
| SNORA20   | 0.69968  | 0.694434 | -0.01086 | 0.434004 |
| SNN       | 0.32815  | 0.32874  | 0.002595 | 0.753263 |
| C1orf130  | 0.229689 | 0.198229 | -0.21252 | 0.044245 |
| GIPC3     | 0.266866 | 0.253513 | -0.07406 | 0.106109 |
| IGSF8     | 0.113918 | 0.11405  | 0.001672 | 0.70602  |
| MED11     | 0.09288  | 0.091885 | -0.01553 | 0.735647 |
| ELF1      | 0.482651 | 0.487115 | 0.013284 | 0.629816 |
| C4orf22   | 0.318187 | 0.348915 | 0.133001 | 0.031994 |
| S100A2    | 0.680087 | 0.650861 | -0.06337 | 0.03332  |
| WARS      | 0.326765 | 0.327678 | 0.004026 | 0.732141 |
| ZNF101    | 0.140554 | 0.144073 | 0.035668 | 0.209468 |
| SETD6     | 0.149819 | 0.154625 | 0.045555 | 0.349257 |
| GLT8D1    | 0.191212 | 0.189481 | -0.01312 | 0.619925 |
| ZFP161    | 0.23613  | 0.238086 | 0.011902 | 0.492152 |
| VTI1A     | 0.505437 | 0.507677 | 0.006381 | 0.95729  |
| C5orf35   | 0.210194 | 0.199314 | -0.07667 | 0.339751 |
| PFN4      | 0.27881  | 0.281654 | 0.014641 | 0.534143 |
| NOD2      | 0.600334 | 0.575855 | -0.06006 | 0.002901 |
| POLG2     | 0.091427 | 0.091771 | 0.005416 | 0.868693 |
| R3HDM2    | 0.555053 | 0.567865 | 0.032921 | 0.127809 |
| RNGTT     | 0.278559 | 0.282614 | 0.020848 | 0.771009 |
| ZNF394    | 0.080716 | 0.080482 | -0.00418 | 0.601969 |

|          |          |          |          |          |
|----------|----------|----------|----------|----------|
| TAOK2    | 0.656971 | 0.654716 | -0.00496 | 0.785293 |
| C4orf35  | 0.637944 | 0.720199 | 0.174967 | 0.011001 |
| IKZF1    | 0.439959 | 0.445415 | 0.017781 | 0.718169 |
| LOC10012 | 0.506382 | 0.511188 | 0.013628 | 0.503967 |
| SRP68    | 0.196798 | 0.201128 | 0.031402 | 0.134344 |
| GPR77    | 0.407172 | 0.401154 | -0.02148 | 0.973995 |
| CNTNAP2  | 0.207158 | 0.207701 | 0.00378  | 0.758575 |
| NUDT9P1  | 0.889432 | 0.87915  | -0.01677 | 0.059281 |
| BACH2    | 0.405621 | 0.398858 | -0.02426 | 0.23687  |
| CSNK1G3  | 0.270857 | 0.275922 | 0.026727 | 0.463281 |
| COL4A1   | 0.475726 | 0.467792 | -0.02426 | 0.382575 |
| ASTN2    | 0.246694 | 0.243979 | -0.01597 | 0.35166  |
| KRTAP3.1 | 0.552776 | 0.536926 | -0.04197 | 0.524997 |
| MTA1     | 0.621675 | 0.61796  | -0.00865 | 0.397984 |
| STARD13  | 0.528582 | 0.520325 | -0.02271 | 0.484845 |
| AZGP1    | 0.539488 | 0.546104 | 0.017584 | 0.84311  |
| RNASEH2F | 0.262305 | 0.250808 | -0.06466 | 0.221546 |
| MUC21    | 0.238141 | 0.243733 | 0.033487 | 0.850404 |
| PDIK1L   | 0.123693 | 0.124955 | 0.014645 | 0.517433 |
| PHOSPHO  | 0.111922 | 0.107746 | -0.05485 | 0.538747 |
| C4orf39  | 0.295837 | 0.26917  | -0.13628 | 0.102631 |
| PCGF3    | 0.722168 | 0.713975 | -0.01646 | 0.075249 |
| MAN2C1   | 0.332664 | 0.3218   | -0.0479  | 0.157551 |
| GALNT3   | 0.272631 | 0.282533 | 0.051473 | 0.659884 |
| CAPN13   | 0.728533 | 0.702472 | -0.05255 | 0.005019 |
| C10orf47 | 0.318745 | 0.327401 | 0.038652 | 0.235948 |
| LOC13920 | 0.150287 | 0.16509  | 0.135534 | 0.372506 |
| FAR1     | 0.173228 | 0.177105 | 0.031936 | 0.213726 |
| CCDC28A  | 0.112677 | 0.111411 | -0.0163  | 0.863198 |
| TOPORS   | 0.196097 | 0.192391 | -0.02753 | 0.249082 |
| ATHL1    | 0.371043 | 0.401422 | 0.113532 | 0.14051  |
| ZDHHC12  | 0.222125 | 0.218003 | -0.02703 | 0.329256 |
| PPP2R1A  | 0.102092 | 0.104184 | 0.029263 | 0.058355 |
| OPTC     | 0.470708 | 0.451129 | -0.06129 | 0.05592  |
| TCF21    | 0.142804 | 0.131838 | -0.11526 | 0.892573 |
| PLEKHG5  | 0.414319 | 0.405336 | -0.03162 | 0.071512 |
| RBMV1F   | 0.548356 | 0.507942 | -0.11045 | 0.365049 |
| CNFN     | 0.226505 | 0.194539 | -0.21949 | 0.009299 |
| MKS1     | 0.313073 | 0.318834 | 0.026308 | 0.42045  |
| UBASH3A  | 0.661591 | 0.667812 | 0.013504 | 0.548014 |
| NAP1L2   | 0.184121 | 0.182502 | -0.01275 | 0.218046 |
| SULT1A2  | 0.490085 | 0.477664 | -0.03704 | 0.6101   |
| GALNT1   | 0.421109 | 0.406576 | -0.05067 | 0.099723 |
| CTNNAL1  | 0.27112  | 0.272422 | 0.006914 | 0.606842 |
| F11      | 0.775721 | 0.813093 | 0.067883 | 0.112283 |
| C19orf33 | 0.523232 | 0.527592 | 0.01197  | 0.318973 |
| MTHFD2   | 0.070405 | 0.07067  | 0.005411 | 0.581053 |
| GNG11    | 0.411528 | 0.382519 | -0.10546 | 0.514426 |
| DHDDS    | 0.103336 | 0.111133 | 0.107504 | 0.07042  |
| FAM50A   | 0.349496 | 0.369445 | 0.080082 | 0.090056 |
| TAF1B    | 0.279953 | 0.279079 | -0.00451 | 0.977709 |
| HSD17B3  | 0.552893 | 0.53493  | -0.04765 | 0.175371 |
| PXDNL    | 0.654568 | 0.663051 | 0.018577 | 0.340928 |
| PLSCR2   | 0.197192 | 0.216323 | 0.133585 | 0.160999 |
| SYNC     | 0.4889   | 0.475457 | -0.04022 | 0.106108 |
| ABCA11P  | 0.098349 | 0.082671 | -0.25052 | 0.346862 |

|           |          |          |          |          |
|-----------|----------|----------|----------|----------|
| DBC1      | 0.301797 | 0.287154 | -0.07175 | 0.025245 |
| CNGA1     | 0.538453 | 0.590954 | 0.134226 | 0.000554 |
| CPN1      | 0.46387  | 0.491724 | 0.084129 | 0.440878 |
| CSNK2A1   | 0.235343 | 0.237075 | 0.010577 | 0.521965 |
| FGF2      | 0.367363 | 0.382164 | 0.056988 | 0.590668 |
| MTMR9     | 0.235905 | 0.24168  | 0.034892 | 0.573107 |
| LOC14584  | 0.54449  | 0.546536 | 0.005411 | 0.865029 |
| SFRS13B   | 0.206396 | 0.208489 | 0.014559 | 0.484846 |
| MIRLET7A2 | 0.827698 | 0.855973 | 0.04846  | 0.365057 |
| C6orf136  | 0.368912 | 0.373824 | 0.019084 | 0.191467 |
| SHBG      | 0.202071 | 0.196107 | -0.04322 | 0.112286 |
| TTYH3     | 0.591843 | 0.58695  | -0.01198 | 0.32466  |
| ASXL1     | 0.182113 | 0.178885 | -0.02579 | 0.799651 |
| RIOK2     | 0.163512 | 0.162008 | -0.01333 | 0.380041 |
| EIF2C3    | 0.200126 | 0.204062 | 0.028096 | 0.552675 |
| IGFL3     | 0.31646  | 0.292677 | -0.11271 | 0.281005 |
| CECR5     | 0.477791 | 0.476183 | -0.00486 | 0.312236 |
| VEGFA     | 0.429828 | 0.425237 | -0.01549 | 0.524997 |
| HAS2      | 0.167481 | 0.164173 | -0.02878 | 0.70602  |
| IZUMO1    | 0.357652 | 0.368186 | 0.041876 | 0.680243 |
| CSTT      | 0.502737 | 0.505819 | 0.008818 | 0.890733 |
| DDX56     | 0.176268 | 0.173292 | -0.02457 | 0.303401 |
| LOC14583  | 0.236647 | 0.248707 | 0.071707 | 0.140508 |
| B4GALT2   | 0.314737 | 0.3093   | -0.02514 | 0.518943 |
| PPRC1     | 0.117728 | 0.114417 | -0.04116 | 0.171691 |
| AP4B1     | 0.043038 | 0.04488  | 0.060472 | 0.252923 |
| LECT1     | 0.603888 | 0.615056 | 0.026436 | 0.496565 |
| MAPRE3    | 0.426944 | 0.423943 | -0.01017 | 0.47184  |
| LGALS4    | 0.705065 | 0.699597 | -0.01123 | 0.339749 |
| SPINT1    | 0.228779 | 0.226818 | -0.01242 | 0.372506 |
| TBX3      | 0.38554  | 0.383553 | -0.00745 | 0.653152 |
| GLRX      | 0.445736 | 0.430809 | -0.04914 | 0.470408 |
| ME2       | 0.141976 | 0.140494 | -0.01514 | 0.574693 |
| GAL3ST2   | 0.535727 | 0.523598 | -0.03304 | 0.09456  |
| TRIM72    | 0.238821 | 0.26083  | 0.127178 | 0.076019 |
| MORN2     | 0.283315 | 0.28899  | 0.028613 | 0.237796 |
| PDHA1     | 0.136074 | 0.142069 | 0.062202 | 0.25584  |
| LRRN4CL   | 0.51722  | 0.518717 | 0.004169 | 0.894414 |
| AKAP2     | 0.479145 | 0.506418 | 0.079868 | 0.018922 |
| RAB3IL1   | 0.384213 | 0.374874 | -0.0355  | 0.306694 |
| SLC35C1   | 0.278977 | 0.271567 | -0.03884 | 0.080755 |
| NAALAD2   | 0.076112 | 0.071673 | -0.08668 | 0.236865 |
| SYNPO     | 0.461763 | 0.446464 | -0.04861 | 0.053573 |
| OR51E1    | 0.263642 | 0.269542 | 0.031927 | 0.718169 |
| MIR196A1  | 0.116403 | 0.109118 | -0.09324 | 0.163095 |
| SAMD11    | 0.24411  | 0.2408   | -0.0197  | 0.429914 |
| LOC28573  | 0.705818 | 0.816445 | 0.21006  | 0.01306  |
| PANX1     | 0.227417 | 0.228464 | 0.006625 | 0.489223 |
| SYDE1     | 0.272299 | 0.278048 | 0.030141 | 0.419109 |
| NCRNA001  | 0.150884 | 0.147517 | -0.03256 | 0.328101 |
| OR10V1    | 0.327658 | 0.334716 | 0.03075  | 0.733893 |
| ALX1      | 0.096152 | 0.095619 | -0.00801 | 0.699111 |
| FAM163A   | 0.212166 | 0.206276 | -0.04062 | 0.27687  |
| TSEN15    | 0.180843 | 0.185235 | 0.034618 | 0.407147 |
| URB2      | 0.204505 | 0.198463 | -0.04327 | 0.226872 |
| CLEC4C    | 0.126634 | 0.140078 | 0.145571 | 0.10865  |

|          |          |          |          |          |
|----------|----------|----------|----------|----------|
| TMLHE    | 0.18074  | 0.185459 | 0.037185 | 0.648122 |
| KLF13    | 0.32808  | 0.325128 | -0.01304 | 0.487761 |
| SLC12A5  | 0.228723 | 0.233367 | 0.028998 | 0.484846 |
| TIA1     | 0.15332  | 0.155107 | 0.016719 | 0.367533 |
| SPINK5L2 | 0.511523 | 0.5161   | 0.01285  | 0.382575 |
| ZNF502   | 0.35284  | 0.3464   | -0.02658 | 0.156185 |
| ZNF773   | 0.354835 | 0.355723 | 0.003607 | 0.876029 |
| ASPH     | 0.442105 | 0.450046 | 0.025683 | 0.294733 |
| TGIF2LY  | 0.466533 | 0.505688 | 0.116269 | 0.20947  |
| USH1C    | 0.552037 | 0.545013 | -0.01847 | 0.721653 |
| KRT73    | 0.578702 | 0.523537 | -0.14453 | 0.073736 |
| PHF8     | 0.234744 | 0.249262 | 0.086575 | 0.297965 |
| TMEM176  | 0.646935 | 0.663046 | 0.035487 | 0.158921 |
| KBTBD12  | 0.553801 | 0.53318  | -0.05475 | 0.152814 |
| C6orf217 | 0.186319 | 0.189275 | 0.022709 | 0.473277 |
| GTF2A2   | 0.203031 | 0.200304 | -0.01951 | 0.337399 |
| COG5     | 0.296655 | 0.288547 | -0.03998 | 0.20032  |
| UGT1A8   | 0.563686 | 0.543283 | -0.05319 | 0.357713 |
| CDR1     | 0.713914 | 0.758623 | 0.087633 | 0.648119 |
| KRTCAP3  | 0.620252 | 0.679396 | 0.131398 | 0.066535 |
| C5orf37  | 0.191105 | 0.194183 | 0.023057 | 0.778143 |
| LYPD4    | 0.652774 | 0.644263 | -0.01893 | 0.610102 |
| TRHR     | 0.492573 | 0.523903 | 0.088962 | 0.187538 |
| ARVCF    | 0.328053 | 0.329615 | 0.006853 | 0.760347 |
| ADAM19   | 0.274384 | 0.283038 | 0.044799 | 0.212016 |
| C6orf141 | 0.106902 | 0.118861 | 0.152985 | 0.064827 |
| KIAA1033 | 0.108026 | 0.107774 | -0.00337 | 0.973995 |
| HBG2     | 0.295017 | 0.315258 | 0.095738 | 0.887053 |
| PSMD13   | 0.317655 | 0.321776 | 0.018598 | 0.581056 |
| EXT2     | 0.306434 | 0.298159 | -0.03949 | 0.13075  |
| MCM10    | 0.126186 | 0.127586 | 0.015909 | 0.468975 |
| ARL11    | 0.347977 | 0.341107 | -0.02877 | 0.597115 |
| KLF14    | 0.130789 | 0.116058 | -0.1724  | 0.011834 |
| RNF146   | 0.106289 | 0.106811 | 0.00707  | 0.521963 |
| KIAA0907 | 0.154032 | 0.15662  | 0.024043 | 0.421795 |
| MIR941.1 | 0.643659 | 0.648084 | 0.009883 | 0.702562 |
| ARHGEF18 | 0.561153 | 0.559754 | -0.0036  | 0.861368 |
| SCN3A    | 0.447949 | 0.463889 | 0.050444 | 0.470408 |
| P2RX3    | 0.426424 | 0.432259 | 0.019609 | 0.616644 |
| WRNIP1   | 0.207592 | 0.204422 | -0.0222  | 0.345673 |
| MS4A12   | 0.209847 | 0.195521 | -0.10201 | 0.324661 |
| ATP6V1F  | 0.084694 | 0.085406 | 0.012077 | 0.63147  |
| C21orf29 | 0.239068 | 0.246355 | 0.043315 | 0.67343  |
| PNP      | 0.161054 | 0.154725 | -0.05784 | 0.170234 |
| COL4A6   | 0.353571 | 0.345547 | -0.03312 | 0.400593 |
| MIR645   | 0.168686 | 0.171434 | 0.023313 | 0.355284 |
| NLRC3    | 0.489199 | 0.507286 | 0.052379 | 0.136171 |
| CCL11    | 0.320016 | 0.297061 | -0.10739 | 0.237796 |
| SLC38A4  | 0.299529 | 0.281931 | -0.08735 | 0.427199 |
| ACOX3    | 0.468806 | 0.460619 | -0.02542 | 0.111238 |
| KCNK16   | 0.594235 | 0.576705 | -0.0432  | 0.241517 |
| TOR1B    | 0.321447 | 0.317461 | -0.018   | 0.562063 |
| TRIM60   | 0.382172 | 0.406529 | 0.089135 | 0.199505 |
| HSPBAP1  | 0.151214 | 0.154155 | 0.027787 | 0.217177 |
| C6orf27  | 0.518016 | 0.522853 | 0.013409 | 0.392808 |
| TGDS     | 0.10829  | 0.110887 | 0.034179 | 0.281004 |

|           |          |          |          |          |
|-----------|----------|----------|----------|----------|
| SNORD115  | 0.690624 | 0.721656 | 0.063412 | 0.765673 |
| MLLT3     | 0.287911 | 0.28016  | -0.03937 | 0.435375 |
| CYSLTR2   | 0.352784 | 0.357117 | 0.017611 | 0.350459 |
| DENND1B   | 0.430755 | 0.443738 | 0.042841 | 0.079549 |
| PRODH     | 0.316474 | 0.306731 | -0.04511 | 0.160998 |
| SALL1     | 0.265017 | 0.247034 | -0.10137 | 0.082798 |
| OR8I2     | 0.381101 | 0.4041   | 0.08454  | 0.365063 |
| C17orf66  | 0.34195  | 0.350391 | 0.035179 | 0.425844 |
| ZNF204P   | 0.092125 | 0.096257 | 0.063311 | 0.555798 |
| PIPOX     | 0.31495  | 0.299793 | -0.07116 | 0.281005 |
| TGFB2     | 0.26506  | 0.302781 | 0.191956 | 0.02236  |
| MAX       | 0.230527 | 0.225454 | -0.0321  | 0.276869 |
| RNF24     | 0.334092 | 0.340759 | 0.028505 | 0.274817 |
| NTF4      | 0.161743 | 0.149674 | -0.11188 | 0.109681 |
| SLC17A9   | 0.566458 | 0.589468 | 0.057445 | 0.109164 |
| CDH24     | 0.39691  | 0.384326 | -0.04648 | 0.067577 |
| SH3BP1    | 0.492646 | 0.483652 | -0.02658 | 0.189889 |
| SRPK2     | 0.418126 | 0.419398 | 0.00438  | 0.835829 |
| C10orf4   | 0.096799 | 0.092503 | -0.06549 | 0.747964 |
| ANKRD12   | 0.238604 | 0.239441 | 0.005049 | 0.739159 |
| PTBP1     | 0.380134 | 0.370668 | -0.03638 | 0.18444  |
| RERGL     | 0.648973 | 0.71358  | 0.136916 | 0.044736 |
| ZSCAN18   | 0.337225 | 0.335917 | -0.00561 | 0.852229 |
| ATXN7     | 0.471425 | 0.481797 | 0.031398 | 0.326952 |
| DYSFIP1   | 0.539584 | 0.548594 | 0.023892 | 0.408466 |
| HNRNPA0   | 0.089122 | 0.090807 | 0.027013 | 0.541828 |
| LOC38933  | 0.318694 | 0.311579 | -0.03257 | 0.194654 |
| OR2A7     | 0.441026 | 0.453836 | 0.041306 | 0.573107 |
| MSMP      | 0.816303 | 0.813061 | -0.00574 | 0.489215 |
| WDR45     | 0.170939 | 0.190677 | 0.15765  | 0.056825 |
| HK1       | 0.398762 | 0.393865 | -0.01783 | 0.463281 |
| PHF16     | 0.221265 | 0.230182 | 0.056999 | 0.32124  |
| TRIM9     | 0.321458 | 0.314035 | -0.03371 | 0.134346 |
| OR51Q1    | 0.30211  | 0.307625 | 0.026097 | 0.868693 |
| LIF       | 0.422872 | 0.405929 | -0.05899 | 0.138638 |
| NUDT3     | 0.17342  | 0.180008 | 0.053788 | 0.211166 |
| D2HGDH    | 0.471343 | 0.465225 | -0.01885 | 0.173154 |
| LOC28576  | 0.304704 | 0.306306 | 0.007567 | 0.728639 |
| PPP1R13B  | 0.384829 | 0.385847 | 0.003813 | 0.711218 |
| FLJ43860  | 0.578135 | 0.56008  | -0.04577 | 0.151483 |
| PPP2R5A   | 0.172868 | 0.17187  | -0.00835 | 0.755032 |
| CSRNP3    | 0.4921   | 0.481901 | -0.03021 | 0.294733 |
| KRTAP19.2 | 0.468138 | 0.483307 | 0.046007 | 0.84311  |
| TMEM63A   | 0.240915 | 0.229862 | -0.06776 | 0.189102 |
| JAG2      | 0.6801   | 0.655281 | -0.05363 | 0.23411  |
| NDUFB5    | 0.165437 | 0.166622 | 0.010303 | 0.464701 |
| LOC40093  | 0.595879 | 0.554916 | -0.10275 | 0.107628 |
| PAGE2     | 0.570452 | 0.583827 | 0.033434 | 0.514426 |
| BCKDK     | 0.357337 | 0.360052 | 0.01092  | 0.450601 |
| MTDH      | 0.16333  | 0.1642   | 0.007664 | 0.349257 |
| IQCJ      | 0.303773 | 0.304985 | 0.005747 | 0.735648 |
| DICER1    | 0.467666 | 0.479557 | 0.036223 | 0.159613 |
| ANO9      | 0.267725 | 0.284937 | 0.089895 | 0.193055 |
| NBR1      | 0.156948 | 0.161079 | 0.037479 | 0.659884 |
| FAM43A    | 0.161911 | 0.157032 | -0.04414 | 0.373754 |
| SNX1      | 0.203407 | 0.205149 | 0.012307 | 0.733893 |

|           |          |          |          |          |
|-----------|----------|----------|----------|----------|
| FGFBP2    | 0.565881 | 0.540438 | -0.06637 | 0.246228 |
| C9orf30   | 0.04188  | 0.040664 | -0.04251 | 0.979565 |
| C6orf142  | 0.584188 | 0.640419 | 0.132585 | 0.031073 |
| SPAG6     | 0.169555 | 0.169604 | 0.000414 | 0.58106  |
| TFDP3     | 0.520565 | 0.525723 | 0.014225 | 0.361376 |
| C11orf48  | 0.188216 | 0.192059 | 0.029159 | 0.143032 |
| FAM135A   | 0.274926 | 0.280475 | 0.028832 | 0.290461 |
| RABL2B    | 0.06936  | 0.064009 | -0.11584 | 0.324655 |
| SERPINA1  | 0.54442  | 0.537248 | -0.01913 | 0.616643 |
| GULP1     | 0.223715 | 0.242685 | 0.117418 | 0.053573 |
| C14orf174 | 0.040619 | 0.041637 | 0.035728 | 0.185961 |
| IKZF4     | 0.389258 | 0.397182 | 0.029073 | 0.299046 |
| PCOTH     | 0.134754 | 0.127671 | -0.0779  | 0.138636 |
| INTS6     | 0.207554 | 0.215313 | 0.052949 | 0.037164 |
| MIR636    | 0.033167 | 0.033572 | 0.01751  | 0.45617  |
| GPX3      | 0.306627 | 0.302153 | -0.02121 | 0.267714 |
| HIST4H4   | 0.250334 | 0.251643 | 0.007524 | 1        |
| HPS6      | 0.11056  | 0.110682 | 0.001587 | 0.582655 |
| LATS2     | 0.305212 | 0.32328  | 0.082972 | 0.218917 |
| RFX2      | 0.343507 | 0.365583 | 0.089863 | 0.247179 |
| USP28     | 0.280243 | 0.279812 | -0.00222 | 0.493622 |
| EFEMP2    | 0.186313 | 0.188327 | 0.015511 | 0.365063 |
| KCTD8     | 0.087264 | 0.094619 | 0.116742 | 0.028957 |
| WDR90     | 0.593926 | 0.590455 | -0.00846 | 0.386389 |
| TRIM38    | 0.62064  | 0.613344 | -0.01706 | 0.912856 |
| TMEM213   | 0.410797 | 0.446209 | 0.119296 | 0.106614 |
| FUZ       | 0.127692 | 0.127453 | -0.0027  | 0.9369   |
| SETD4     | 0.161678 | 0.165891 | 0.037111 | 0.246228 |
| MATN4     | 0.386299 | 0.405147 | 0.06873  | 0.360152 |
| KIAA0753  | 0.347103 | 0.353927 | 0.028088 | 0.434006 |
| DEFB129   | 0.351243 | 0.363526 | 0.049587 | 0.593888 |
| MC5R      | 0.212962 | 0.230908 | 0.116723 | 0.138019 |
| SPAG16    | 0.293657 | 0.295033 | 0.006742 | 0.477596 |
| HLA.DRB6  | 0.135609 | 0.131441 | -0.04504 | 0.524997 |
| C6orf52   | 0.098973 | 0.099942 | 0.014068 | 0.797851 |
| TMCC2     | 0.450217 | 0.436399 | -0.04497 | 0.021819 |
| C15orf40  | 0.160743 | 0.181452 | 0.174829 | 0.013849 |
| OR5T2     | 0.19472  | 0.211829 | 0.1215   | 0.528038 |
| SLC4A8    | 0.328715 | 0.33854  | 0.042488 | 0.090943 |
| TEKT1     | 0.124546 | 0.116634 | -0.09469 | 0.145594 |
| C17orf63  | 0.334    | 0.327331 | -0.0291  | 0.41111  |
| C19orf39  | 0.1385   | 0.133536 | -0.05266 | 0.041844 |
| CPN2      | 0.755226 | 0.755255 | 5.57E-05 | 0.739157 |
| AKAP8L    | 0.254495 | 0.258838 | 0.024412 | 0.532614 |
| FAT1      | 0.491737 | 0.528423 | 0.103808 | 0.173892 |
| USP34     | 0.10653  | 0.108044 | 0.020354 | 0.480489 |
| STL       | 0.067108 | 0.07595  | 0.178577 | 0.018686 |
| CCRL1     | 0.315707 | 0.312846 | -0.01314 | 0.896256 |
| NUP205    | 0.080636 | 0.07936  | -0.02302 | 0.554234 |
| NUDT6     | 0.069985 | 0.074067 | 0.081794 | 0.022086 |
| LOC40783  | 0.521028 | 0.533755 | 0.034816 | 0.611733 |
| CDC45L    | 0.554893 | 0.565749 | 0.027954 | 0.323516 |
| CA5B      | 0.216044 | 0.18449  | -0.22778 | 0.819501 |
| WHAMM     | 0.207641 | 0.20868  | 0.007203 | 0.716428 |
| FKBP4     | 0.119289 | 0.123392 | 0.048783 | 0.399289 |
| MMP14     | 0.37715  | 0.415056 | 0.138168 | 0.072248 |

|          |          |          |          |          |
|----------|----------|----------|----------|----------|
| ZNF578   | 0.247549 | 0.259754 | 0.069436 | 0.16879  |
| HOXB8    | 0.081605 | 0.078004 | -0.06511 | 0.31559  |
| MIR1265  | 0.360172 | 0.339506 | -0.08525 | 0.052148 |
| WNT2     | 0.197606 | 0.191471 | -0.04551 | 0.322375 |
| DISC1    | 0.488778 | 0.482815 | -0.01771 | 0.452    |
| KCNIP2   | 0.256889 | 0.272583 | 0.085553 | 0.103616 |
| CRIP1    | 0.207857 | 0.204449 | -0.02385 | 0.785294 |
| RNASE13  | 0.421285 | 0.392834 | -0.10088 | 0.153485 |
| COL9A3   | 0.252899 | 0.268342 | 0.085511 | 0.113877 |
| BFAR     | 0.323032 | 0.325774 | 0.012196 | 0.885214 |
| PLAT     | 0.542964 | 0.530427 | -0.0337  | 0.119298 |
| GRID2    | 0.290897 | 0.290996 | 0.000492 | 0.964713 |
| TMEM64   | 0.316643 | 0.319804 | 0.014331 | 0.639772 |
| JPH3     | 0.544171 | 0.545275 | 0.002922 | 0.817691 |
| TRHDE    | 0.459052 | 0.480847 | 0.06692  | 0.073364 |
| SHC1     | 0.248699 | 0.246642 | -0.01198 | 0.828563 |
| SUMO2    | 0.09056  | 0.093818 | 0.051003 | 0.088736 |
| MUC4     | 0.422606 | 0.424992 | 0.008123 | 0.401898 |
| MIR1180  | 0.75191  | 0.766281 | 0.027314 | 0.765669 |
| EDEM3    | 0.154039 | 0.154242 | 0.001894 | 0.737402 |
| NDUFA3   | 0.097325 | 0.10046  | 0.045746 | 0.404518 |
| SPHKAP   | 0.373852 | 0.360862 | -0.05102 | 0.471841 |
| ZNF434   | 0.590074 | 0.589267 | -0.00197 | 0.95358  |
| PHF10    | 0.041105 | 0.041643 | 0.01876  | 0.863195 |
| NKG7     | 0.287594 | 0.270111 | -0.09048 | 0.283088 |
| MLL3     | 0.576878 | 0.58015  | 0.008159 | 0.38895  |
| PPAN     | 0.4237   | 0.418629 | -0.01737 | 0.755032 |
| NAPSB    | 0.364263 | 0.335487 | -0.11872 | 0.02391  |
| CDH13    | 0.457813 | 0.421952 | -0.11768 | 0.005394 |
| MIR1243  | 0.857446 | 0.875591 | 0.030212 | 0.440862 |
| GLYCTK   | 0.355881 | 0.360709 | 0.019437 | 0.38895  |
| CSGALNA  | 0.460602 | 0.469003 | 0.026078 | 0.108135 |
| NUP188   | 0.237202 | 0.234504 | -0.01651 | 0.585853 |
| TPBG     | 0.136395 | 0.142193 | 0.060059 | 0.399288 |
| KCNAB2   | 0.536839 | 0.538822 | 0.005321 | 0.824936 |
| OR4Q3    | 0.59974  | 0.567077 | -0.08079 | 0.289401 |
| DBX1     | 0.078212 | 0.06959  | -0.16852 | 0.688792 |
| HAUS2    | 0.037611 | 0.037614 | 0.000125 | 0.903625 |
| ST6GALNA | 0.248924 | 0.239868 | -0.05346 | 0.158923 |
| FABP9    | 0.617112 | 0.62474  | 0.017723 | 0.597113 |
| LOC28339 | 0.05237  | 0.053425 | 0.028776 | 0.259742 |
| ELMO3    | 0.657724 | 0.699906 | 0.089679 | 0.028956 |
| PSMB9    | 0.128514 | 0.13335  | 0.053287 | 0.210316 |
| NDUFV3   | 0.162538 | 0.163956 | 0.012537 | 0.538748 |
| DSCR4    | 0.688086 | 0.647658 | -0.08736 | 0.040917 |
| ACTA2    | 0.381001 | 0.364119 | -0.06538 | 0.02391  |
| MIR1207  | 0.313267 | 0.30974  | -0.01634 | 0.661571 |
| OPN1LW   | 0.781758 | 0.767908 | -0.02579 | 0.368768 |
| IL13RA1  | 0.239011 | 0.247864 | 0.052475 | 0.509931 |
| MIR376B  | 0.861283 | 0.853851 | -0.0125  | 0.477587 |
| NT5DC3   | 0.354837 | 0.351203 | -0.01485 | 0.431274 |
| C17orf47 | 0.671965 | 0.652684 | -0.042   | 0.290459 |
| PLUNC    | 0.44086  | 0.469623 | 0.091184 | 0.407148 |
| PRPF6    | 0.520513 | 0.515052 | -0.01522 | 0.411113 |
| TRIM31   | 0.172559 | 0.168376 | -0.0354  | 0.574694 |
| DLX2     | 0.0731   | 0.067815 | -0.10826 | 0.000977 |

|          |          |          |          |          |
|----------|----------|----------|----------|----------|
| TRAF3IP2 | 0.35176  | 0.356268 | 0.018372 | 0.615005 |
| FOXB1    | 0.063362 | 0.064137 | 0.017548 | 0.737395 |
| GABARAPL | 0.095436 | 0.097101 | 0.024944 | 0.349253 |
| EPB41L2  | 0.322864 | 0.370814 | 0.19977  | 0.016789 |
| RPL23AP7 | 0.12265  | 0.125482 | 0.032943 | 0.077963 |
| C22orf33 | 0.323044 | 0.286151 | -0.17495 | 0.027127 |
| SSU72    | 0.603733 | 0.603564 | -0.0004  | 0.91655  |
| TMEM165  | 0.063622 | 0.061292 | -0.05382 | 0.714688 |
| CMPK2    | 0.199992 | 0.199543 | -0.00324 | 0.785293 |
| NRP2     | 0.432013 | 0.437611 | 0.018575 | 0.409789 |
| TTC14    | 0.252375 | 0.258121 | 0.032481 | 0.206109 |
| IPMK     | 0.075116 | 0.067043 | -0.16403 | 0.011992 |
| SCRT2    | 0.341302 | 0.331405 | -0.04246 | 0.370014 |
| CHD6     | 0.158634 | 0.154755 | -0.03571 | 0.333892 |
| MIR502   | 0.588862 | 0.602284 | 0.032516 | 0.20114  |
| FSD1     | 0.319909 | 0.317849 | -0.00932 | 0.600349 |
| S100A16  | 0.785937 | 0.763682 | -0.04144 | 0.052146 |
| PCDH10   | 0.096967 | 0.101685 | 0.068537 | 0.123212 |
| FOXR1    | 0.44215  | 0.442055 | -0.00031 | 0.785294 |
| ZNF354B  | 0.225653 | 0.228471 | 0.017903 | 0.690511 |
| MRPS14   | 0.137449 | 0.138863 | 0.014762 | 0.493622 |
| HNRNPH1  | 0.16418  | 0.163227 | -0.0084  | 0.972138 |
| FAM126B  | 0.35953  | 0.361293 | 0.007057 | 0.563633 |
| PITRM1   | 0.572145 | 0.57042  | -0.00435 | 0.735644 |
| C2orf84  | 0.7759   | 0.77012  | -0.01079 | 0.355281 |
| AAAS     | 0.068789 | 0.072063 | 0.067082 | 0.101648 |
| MRPL43   | 0.094387 | 0.097359 | 0.044723 | 0.287286 |
| TNFSF18  | 0.474726 | 0.514553 | 0.116224 | 0.229569 |
| ST6GAL1  | 0.280602 | 0.283651 | 0.015595 | 0.962857 |
| CCL4L1   | 0.145726 | 0.142665 | -0.03063 | 0.760347 |
| FAM196A  | 0.273624 | 0.265278 | -0.04469 | 0.48049  |
| LY6G5C   | 0.19728  | 0.20409  | 0.048962 | 0.518942 |
| C17orf59 | 0.073739 | 0.073259 | -0.00941 | 0.828563 |
| KIAA0415 | 0.539935 | 0.537325 | -0.00699 | 0.532613 |
| TMEM212  | 0.566892 | 0.629702 | 0.151595 | 0.006444 |
| ARHGAP27 | 0.419196 | 0.400856 | -0.06454 | 0.006265 |
| RTN4     | 0.310541 | 0.313089 | 0.011789 | 0.77101  |
| CUTA     | 0.145462 | 0.142574 | -0.02893 | 0.442257 |
| MAOA     | 0.189356 | 0.203785 | 0.105942 | 0.304496 |
| GNGT2    | 0.439956 | 0.411055 | -0.09803 | 0.293661 |
| TAL1     | 0.231933 | 0.219459 | -0.07976 | 0.281004 |
| UBXN1    | 0.141789 | 0.14157  | -0.00223 | 0.946164 |
| NPAT     | 0.144477 | 0.144773 | 0.00295  | 0.763895 |
| ZNF511   | 0.383132 | 0.400128 | 0.062618 | 0.035912 |
| COL9A2   | 0.339398 | 0.33706  | -0.00997 | 0.495094 |
| CABLES1  | 0.284203 | 0.249912 | -0.1855  | 0.015355 |
| MAPK4    | 0.474087 | 0.476106 | 0.006133 | 0.735647 |
| CAMKV    | 0.351922 | 0.340348 | -0.04825 | 0.161696 |
| SNORD55  | 0.020415 | 0.021141 | 0.050438 | 0.095835 |
| FAM136A  | 0.103707 | 0.10602  | 0.031829 | 0.378778 |
| SLC35A2  | 0.163695 | 0.17314  | 0.080926 | 0.18754  |
| TCFL5    | 0.134682 | 0.131343 | -0.03621 | 0.263717 |
| ANAPC2   | 0.476146 | 0.468091 | -0.02462 | 0.292591 |
| SEN8     | 0.639819 | 0.658679 | 0.041912 | 0.264712 |
| MCF2L2   | 0.318657 | 0.296219 | -0.10534 | 0.041846 |
| OR10K1   | 0.22017  | 0.245294 | 0.155895 | 0.555799 |

|          |          |          |          |          |
|----------|----------|----------|----------|----------|
| ZNF425   | 0.348772 | 0.342485 | -0.02624 | 0.161696 |
| NCRNA000 | 0.226511 | 0.218753 | -0.05028 | 0.17537  |
| SC65     | 0.243645 | 0.22356  | -0.12412 | 0.007159 |
| WNT7B    | 0.333144 | 0.320659 | -0.05511 | 0.302309 |
| C15orf39 | 0.27759  | 0.266492 | -0.05886 | 0.027781 |
| CCDC47   | 0.396699 | 0.397669 | 0.003521 | 0.783504 |
| CALML3   | 0.664335 | 0.680523 | 0.034734 | 0.445028 |
| GSDMD    | 0.243246 | 0.244577 | 0.007868 | 0.626512 |
| ECEL1    | 0.27654  | 0.269289 | -0.03833 | 0.450601 |
| SNRK     | 0.563897 | 0.575155 | 0.02852  | 0.127228 |
| CCDC69   | 0.284238 | 0.269987 | -0.07421 | 0.008568 |
| KRT19    | 0.448082 | 0.509837 | 0.186273 | 0.059605 |
| XPO5     | 0.229889 | 0.229594 | -0.00185 | 0.656514 |
| TNR      | 0.521997 | 0.517823 | -0.01158 | 0.361376 |
| CLP1     | 0.214511 | 0.20204  | -0.08641 | 0.030176 |
| PTPDC1   | 0.36864  | 0.361244 | -0.02924 | 0.443645 |
| PHYHIPL  | 0.148772 | 0.148361 | -0.00399 | 1        |
| JAK3     | 0.341249 | 0.333358 | -0.03375 | 0.109163 |
| SLC44A2  | 0.285499 | 0.282246 | -0.01653 | 0.284133 |
| ZNF516   | 0.701367 | 0.725827 | 0.049456 | 0.225084 |
| BSX      | 0.507243 | 0.434009 | -0.22495 | 0.053573 |
| MRPL20   | 0.130468 | 0.133149 | 0.02934  | 0.395392 |
| SMC3     | 0.085008 | 0.087237 | 0.037341 | 0.48484  |
| LOC72792 | 0.231444 | 0.216432 | -0.09675 | 0.179108 |
| CEBPD    | 0.046011 | 0.044631 | -0.04391 | 0.249065 |
| C21orf88 | 0.057268 | 0.054179 | -0.07999 | 0.489208 |
| RNF41    | 0.135745 | 0.136744 | 0.010578 | 0.484845 |
| CSTF2    | 0.170777 | 0.187254 | 0.132881 | 0.264713 |
| ITGAV    | 0.221387 | 0.225421 | 0.026049 | 0.41911  |
| CSN1S2B  | 0.123725 | 0.154352 | 0.319084 | 0.004123 |
| ZNF826   | 0.115966 | 0.11856  | 0.031919 | 0.685369 |
| FLJ46321 | 0.673926 | 0.653913 | -0.04349 | 0.09829  |
| SNORD180 | 0.314585 | 0.277369 | -0.18164 | 0.059605 |
| PNKP     | 0.221451 | 0.219822 | -0.01065 | 0.501    |
| PLEKHJ1  | 0.090922 | 0.089006 | -0.03074 | 0.725142 |
| INPP4B   | 0.403997 | 0.406734 | 0.009741 | 0.922096 |
| HIST1H4F | 0.457665 | 0.53271  | 0.219058 | 0.084461 |
| LOC10027 | 0.371118 | 0.368592 | -0.00985 | 0.725142 |
| RPRM     | 0.141488 | 0.150367 | 0.087807 | 0.029999 |
| C11orf45 | 0.186271 | 0.177503 | -0.06956 | 0.047536 |
| MIR503   | 0.746695 | 0.718911 | -0.0547  | 0.503959 |
| STAP2    | 0.287821 | 0.294069 | 0.030986 | 0.656515 |
| TGFBR3   | 0.299748 | 0.31845  | 0.087318 | 0.10968  |
| HSFY1    | 0.20966  | 0.187513 | -0.16106 | 0.367507 |
| MOSC1    | 0.219279 | 0.208493 | -0.07277 | 0.059606 |
| CD4      | 0.457751 | 0.434287 | -0.07591 | 0.029474 |
| TCIRG1   | 0.647375 | 0.627626 | -0.0447  | 0.063155 |
| NIPAL2   | 0.264637 | 0.28393  | 0.101524 | 0.14819  |
| FOXD4L5  | 0.602993 | 0.61973  | 0.039499 | 0.351659 |
| MICAL3   | 0.396851 | 0.393489 | -0.01228 | 0.295806 |
| C7orf51  | 0.28462  | 0.297007 | 0.06146  | 0.487762 |
| NRIP1    | 0.251124 | 0.276653 | 0.139679 | 0.01811  |
| VAMP3    | 0.299323 | 0.303778 | 0.021314 | 0.275843 |
| NUP160   | 0.166614 | 0.16924  | 0.022556 | 0.267716 |
| PEF1     | 0.164983 | 0.167928 | 0.025528 | 0.382573 |
| SPIRE1   | 0.266153 | 0.261568 | -0.02507 | 0.391519 |

|           |          |          |          |          |
|-----------|----------|----------|----------|----------|
| PIGP      | 0.039165 | 0.039727 | 0.020575 | 0.432619 |
| CLEC1A    | 0.306691 | 0.282101 | -0.12057 | 0.16807  |
| GPR150    | 0.110493 | 0.114528 | 0.051745 | 0.329254 |
| FAIM2     | 0.214579 | 0.213661 | -0.00618 | 0.587456 |
| NCRNA000  | 0.579428 | 0.585664 | 0.015444 | 0.355279 |
| VPS24     | 0.276808 | 0.285629 | 0.045255 | 0.076405 |
| ENPP1     | 0.17469  | 0.175586 | 0.007382 | 0.881538 |
| WBSCR28   | 0.594209 | 0.574933 | -0.04757 | 0.015257 |
| ATL1      | 0.254706 | 0.257646 | 0.016559 | 0.473276 |
| AGPS      | 0.548341 | 0.56363  | 0.039675 | 0.143671 |
| NAP1L4    | 0.243596 | 0.238982 | -0.02759 | 0.368773 |
| IL17D     | 0.430102 | 0.447864 | 0.058384 | 0.037591 |
| ZNF706    | 0.147856 | 0.150902 | 0.029416 | 0.378778 |
| VSTM2B    | 0.156716 | 0.15333  | -0.03151 | 0.506944 |
| UBAC2     | 0.422191 | 0.42493  | 0.009332 | 0.435376 |
| FAM123B   | 0.284906 | 0.294012 | 0.045393 | 0.4151   |
| SPNS3     | 0.422955 | 0.385016 | -0.13559 | 0.012557 |
| TANC2     | 0.614874 | 0.628118 | 0.030745 | 0.03759  |
| ATP2A2    | 0.444162 | 0.449464 | 0.017118 | 0.523478 |
| DIS3      | 0.183303 | 0.179215 | -0.03254 | 0.46186  |
| EFR3A     | 0.344708 | 0.350209 | 0.022841 | 0.50993  |
| LOC100121 | 0.046368 | 0.045474 | -0.02811 | 0.275827 |
| FIG4      | 0.748299 | 0.754119 | 0.011177 | 0.534134 |
| G3BP1     | 0.152243 | 0.148614 | -0.0348  | 0.383844 |
| DHX9      | 0.109265 | 0.109511 | 0.003246 | 0.66664  |
| MIR514.2  | 0.253503 | 0.239597 | -0.08139 | 0.304497 |
| CNKSR2    | 0.260014 | 0.281959 | 0.116895 | 0.134346 |
| SNORD92   | 0.904957 | 0.907778 | 0.00449  | 0.401832 |
| ACAD9     | 0.121983 | 0.122406 | 0.004992 | 0.659883 |
| TSPYL2    | 0.301434 | 0.314437 | 0.060926 | 0.345674 |
| TIGD7     | 0.918643 | 0.928129 | 0.014821 | 0.216229 |
| FAM129C   | 0.304194 | 0.293845 | -0.04993 | 0.067927 |
| ARHGAP4   | 0.405429 | 0.418312 | 0.045132 | 0.503968 |
| H2AFX     | 0.069925 | 0.069011 | -0.019   | 0.896255 |
| PDLIM4    | 0.454459 | 0.430037 | -0.07969 | 0.090498 |
| ATRIP     | 0.205842 | 0.214982 | 0.062676 | 0.048589 |
| ADAD2     | 0.633667 | 0.592787 | -0.09621 | 0.019159 |
| C17orf42  | 0.118038 | 0.118176 | 0.001683 | 0.54337  |
| AMDHD2    | 0.392108 | 0.391091 | -0.00375 | 0.861369 |
| GDF1      | 0.389454 | 0.389761 | 0.001135 | 0.817692 |
| MAP9      | 0.179215 | 0.174278 | -0.04029 | 0.158235 |
| PAX3      | 0.148316 | 0.141365 | -0.06925 | 0.037591 |
| PTGR2     | 0.099284 | 0.102369 | 0.044136 | 0.09829  |
| EDA2R     | 0.39234  | 0.436509 | 0.153907 | 0.071147 |
| ORAI3     | 0.076785 | 0.074959 | -0.03473 | 0.146886 |
| IQSEC2    | 0.284156 | 0.274448 | -0.05015 | 0.231378 |
| TRAF3IP3  | 0.669373 | 0.632964 | -0.08069 | 0.014397 |
| UAP1L1    | 0.404124 | 0.414029 | 0.034933 | 0.551122 |
| ZNF567    | 0.053439 | 0.056577 | 0.082334 | 0.316717 |
| MUM1L1    | 0.292216 | 0.279898 | -0.06213 | 0.416435 |
| KIAA0802  | 0.736253 | 0.724715 | -0.02279 | 0.091833 |
| SNX16     | 0.155188 | 0.160257 | 0.046371 | 0.057738 |
| MYO15A    | 0.596005 | 0.579845 | -0.03966 | 0.041147 |
| EFTUD2    | 0.202332 | 0.204025 | 0.012016 | 0.733893 |
| DISP2     | 0.339089 | 0.335305 | -0.01619 | 0.259758 |
| TMX3      | 0.332623 | 0.330193 | -0.01058 | 0.606843 |

|          |          |          |          |          |
|----------|----------|----------|----------|----------|
| CDH10    | 0.378505 | 0.387784 | 0.034943 | 0.385117 |
| KRT28    | 0.407104 | 0.389835 | -0.06253 | 0.496566 |
| PRAMEF1  | 0.484364 | 0.48192  | -0.0073  | 0.949872 |
| RAB7L1   | 0.356394 | 0.340178 | -0.06718 | 0.066881 |
| TYW1B    | 0.177956 | 0.187832 | 0.077922 | 0.088304 |
| ANKS1B   | 0.284227 | 0.276941 | -0.03747 | 0.305594 |
| HHATL    | 0.608986 | 0.588581 | -0.04917 | 0.329254 |
| GBP7     | 0.261979 | 0.302666 | 0.208278 | 0.040233 |
| SLC13A4  | 0.625996 | 0.634667 | 0.019846 | 0.20444  |
| RAG1     | 0.707493 | 0.709892 | 0.004883 | 0.693946 |
| CA9      | 0.516923 | 0.486696 | -0.08693 | 0.000419 |
| PTPRB    | 0.237442 | 0.270889 | 0.190129 | 0.01916  |
| CMBL     | 0.285282 | 0.256611 | -0.1528  | 0.003635 |
| LOC40158 | 0.099034 | 0.110059 | 0.152279 | 0.434003 |
| MAN2B2   | 0.532965 | 0.529559 | -0.00925 | 0.416434 |
| MIR365.2 | 0.763899 | 0.74736  | -0.03158 | 0.091835 |
| LNX2     | 0.656142 | 0.683962 | 0.059908 | 0.017659 |
| ENOSF1   | 0.287297 | 0.289095 | 0.009001 | 0.732141 |
| OPRL1    | 0.593005 | 0.576921 | -0.03967 | 0.01811  |
| ANKRD10  | 0.525106 | 0.53159  | 0.017705 | 0.382572 |
| RBM4B    | 0.214835 | 0.220344 | 0.036528 | 0.385116 |
| HMGCS1   | 0.147448 | 0.153675 | 0.059678 | 0.042791 |
| DNAJC17  | 0.349478 | 0.307252 | -0.18578 | 0.000254 |
| RPS19    | 0.061776 | 0.060442 | -0.0315  | 0.877862 |
| PLCG2    | 0.550657 | 0.533036 | -0.04692 | 0.202787 |
| DYSF     | 0.306079 | 0.294991 | -0.05323 | 0.079949 |
| WDR53    | 0.192974 | 0.188853 | -0.03114 | 0.400591 |
| KIAA0406 | 0.080551 | 0.077968 | -0.04703 | 0.38639  |
| LOC40138 | 0.518798 | 0.529752 | 0.030145 | 0.626511 |
| ZNRF2    | 0.327187 | 0.327362 | 0.00077  | 0.927644 |
| RPA2     | 0.07838  | 0.080771 | 0.043349 | 0.351657 |
| MC2R     | 0.345974 | 0.361758 | 0.064364 | 0.51593  |
| RPL3     | 0.419281 | 0.395103 | -0.08569 | 0.193056 |
| ABCF2    | 0.170569 | 0.16619  | -0.03752 | 0.141767 |
| MIR21    | 0.662204 | 0.69821  | 0.076385 | 0.028786 |
| GGT1     | 0.429523 | 0.406967 | -0.07782 | 0.002304 |
| OR6B2    | 0.215956 | 0.207137 | -0.06015 | 0.218047 |
| NBPF9    | 0.47648  | 0.484199 | 0.023184 | 0.538749 |
| CDC16    | 0.262805 | 0.257688 | -0.02837 | 0.621567 |
| ADCY3    | 0.472464 | 0.467336 | -0.01574 | 0.438122 |
| PTGFR    | 0.098871 | 0.097593 | -0.01877 | 0.664949 |
| SMAD7    | 0.359091 | 0.349125 | -0.0406  | 0.147536 |
| FAM129A  | 0.289559 | 0.333969 | 0.205857 | 0.00205  |
| GOLGA8B  | 0.12118  | 0.123426 | 0.026485 | 0.392806 |
| LTBR     | 0.336297 | 0.337358 | 0.004548 | 0.894414 |
| RTN4RL1  | 0.436125 | 0.419199 | -0.05711 | 0.030354 |
| RTN1     | 0.297669 | 0.294927 | -0.01335 | 0.415097 |
| MRPL42   | 0.144269 | 0.140621 | -0.03695 | 0.304494 |
| PTGER2   | 0.339885 | 0.345033 | 0.02169  | 0.443642 |
| OR4P4    | 0.346618 | 0.399377 | 0.204403 | 0.158236 |
| C19orf46 | 0.626068 | 0.639961 | 0.031665 | 0.156862 |
| ALKBH8   | 0.069174 | 0.072736 | 0.072446 | 0.045485 |
| PXMP3    | 0.145043 | 0.146455 | 0.013975 | 0.187539 |
| CC2D2A   | 0.231275 | 0.223129 | -0.05173 | 0.238722 |
| PIGA     | 0.193225 | 0.213566 | 0.144403 | 0.01928  |
| RNASEH2A | 0.218168 | 0.217439 | -0.00483 | 0.781715 |

|           |          |          |           |          |
|-----------|----------|----------|-----------|----------|
| GRM6      | 0.480564 | 0.496765 | 0.047833  | 0.14431  |
| C1orf210  | 0.509115 | 0.469112 | -0.11806  | 0.1495   |
| SCRT1     | 0.211472 | 0.229785 | 0.119817  | 0.163098 |
| FBXO11    | 0.249129 | 0.255074 | 0.034025  | 0.508435 |
| SLC45A1   | 0.711291 | 0.697745 | -0.02774  | 0.271751 |
| SLC2A3    | 0.137164 | 0.14168  | 0.04673   | 0.191468 |
| LOC100321 | 0.020803 | 0.019095 | -0.12356  | 0.350335 |
| TEX15     | 0.563061 | 0.622803 | 0.145483  | 0.000549 |
| PARP11    | 0.362492 | 0.374584 | 0.047339  | 0.21287  |
| OR4C3     | 0.049797 | 0.045381 | -0.13398  | 0.219787 |
| PROS1     | 0.375116 | 0.40899  | 0.124729  | 0.004404 |
| EIF3A     | 0.337252 | 0.333554 | -0.01591  | 0.598731 |
| TMEM131   | 0.495098 | 0.493257 | -0.00538  | 0.435373 |
| PA2G4P4   | 0.701421 | 0.666266 | -0.07418  | 0.200315 |
| BAGE5     | 0.152317 | 0.158809 | 0.060212  | 0.331571 |
| CIITA     | 0.403415 | 0.373278 | -0.11201  | 0.006221 |
| TRAPPC10  | 0.112671 | 0.113746 | 0.013692  | 0.481938 |
| TNFSF4    | 0.401821 | 0.41681  | 0.052839  | 0.626511 |
| MAP3K9    | 0.421274 | 0.421209 | -0.00022  | 0.796053 |
| PI15      | 0.334293 | 0.339874 | 0.023887  | 0.634786 |
| CAND2     | 0.400112 | 0.388142 | -0.04382  | 0.021552 |
| ITGA8     | 0.241436 | 0.227732 | -0.0843   | 0.01766  |
| KIFC1     | 0.294199 | 0.294287 | 0.000429  | 0.828564 |
| GADD45A   | 0.093259 | 0.088206 | -0.08037  | 0.157549 |
| ORM2      | 0.396813 | 0.405285 | 0.030478  | 0.524997 |
| FAM20C    | 0.471826 | 0.480491 | 0.026254  | 0.355284 |
| NLRC5     | 0.350859 | 0.340726 | -0.04228  | 0.143671 |
| GLIS3     | 0.444847 | 0.446211 | 0.004417  | 0.718168 |
| TGM1      | 0.671162 | 0.684418 | 0.028217  | 0.191465 |
| PTH2      | 0.093084 | 0.093026 | -0.0009   | 0.848579 |
| RPL39L    | 0.260836 | 0.252291 | -0.04805  | 0.31447  |
| ACTR8     | 0.151988 | 0.152807 | 0.007756  | 0.407148 |
| TP63      | 0.474792 | 0.499351 | 0.072759  | 0.395394 |
| ALOXE3    | 0.239458 | 0.236911 | -0.01542  | 0.767451 |
| RPL23AP3  | 0.648467 | 0.654591 | 0.01356   | 0.331564 |
| CEACAM4   | 0.239905 | 0.22646  | -0.08321  | 0.18832  |
| WDR35     | 0.219881 | 0.220541 | 0.004324  | 0.903629 |
| B3GAT2    | 0.237946 | 0.237353 | -0.0036   | 0.998142 |
| CD36      | 0.522934 | 0.543615 | 0.055957  | 0.047535 |
| YLPM1     | 0.250027 | 0.249045 | -0.00568  | 0.758574 |
| MLL       | 0.168399 | 0.172359 | 0.033535  | 0.146888 |
| PATE2     | 0.289998 | 0.292444 | 0.012113  | 0.992569 |
| POU3F1    | 0.128607 | 0.120648 | -0.09217  | 0.136173 |
| STRN      | 0.109378 | 0.106815 | -0.03422  | 0.377518 |
| KRT71     | 0.599989 | 0.559305 | -0.1013   | 0.218917 |
| IL11      | 0.219945 | 0.189288 | -0.21656  | 0.011373 |
| C20orf160 | 0.079114 | 0.074574 | -0.08526  | 0.110196 |
| MAGEA2    | 0.7042   | 0.650771 | -0.11384  | 0.061521 |
| C6orf186  | 0.503092 | 0.505709 | 0.007487  | 0.496566 |
| STARD8    | 0.311946 | 0.305459 | -0.03032  | 0.216311 |
| GRM4      | 0.616061 | 0.609628 | -0.01514  | 0.52045  |
| SLC1A1    | 0.225743 | 0.229451 | 0.023506  | 0.273795 |
| MAD2L2    | 0.224556 | 0.214319 | -0.06731  | 0.085727 |
| HIST3H2A  | 0.052944 | 0.053911 | 0.026101  | 0.150151 |
| TFCP2     | 0.247136 | 0.247315 | 0.001046  | 0.606844 |
| CDK5RAP1  | 0.182602 | 0.182592 | -8.50E-05 | 0.985138 |

|          |          |          |          |          |
|----------|----------|----------|----------|----------|
| ITGA2B   | 0.471838 | 0.459474 | -0.03831 | 0.087006 |
| 8.Sep    | 0.363035 | 0.370775 | 0.030435 | 0.295808 |
| SLC38A7  | 0.226022 | 0.225494 | -0.00338 | 0.968425 |
| LINGO1   | 0.518944 | 0.512899 | -0.0169  | 0.250042 |
| TRIM73   | 0.63512  | 0.654856 | 0.044148 | 0.187537 |
| RGS22    | 0.301435 | 0.316973 | 0.072511 | 0.023621 |
| SFRS5    | 0.357223 | 0.36257  | 0.021433 | 0.628163 |
| SART3    | 0.217957 | 0.221165 | 0.02108  | 0.302309 |
| OGDHL    | 0.273039 | 0.269678 | -0.01787 | 0.552679 |
| CBX7     | 0.282057 | 0.271471 | -0.05519 | 0.161696 |
| KIAA1012 | 0.110191 | 0.11027  | 0.001035 | 0.611732 |
| ZNF510   | 0.329307 | 0.32084  | -0.03758 | 0.224198 |
| CD274    | 0.276001 | 0.273823 | -0.01143 | 0.857711 |
| TMEM129  | 0.309717 | 0.301144 | -0.0405  | 0.179108 |
| CTDSP2   | 0.309296 | 0.319033 | 0.044715 | 0.058978 |
| ZNF74    | 0.376474 | 0.370961 | -0.02128 | 0.360153 |
| RPS6KA2  | 0.586319 | 0.58235  | -0.0098  | 0.471835 |
| ELTD1    | 0.558387 | 0.623621 | 0.159403 | 0.046502 |
| AMELY    | 0.411309 | 0.371281 | -0.14771 | 0.371232 |
| MIR638   | 0.016838 | 0.016568 | -0.02335 | 0.972123 |
| MRO      | 0.354863 | 0.343006 | -0.04903 | 0.018804 |
| ZNF790   | 0.081028 | 0.080877 | -0.0027  | 0.781715 |
| MIR515.1 | 0.516303 | 0.528601 | 0.03396  | 0.651474 |
| KIAA1211 | 0.825964 | 0.823898 | -0.00361 | 0.659873 |
| PLD1     | 0.352866 | 0.373274 | 0.081115 | 0.01766  |
| C17orf54 | 0.434976 | 0.42395  | -0.03704 | 0.077962 |
| SERPINB1 | 0.198962 | 0.205629 | 0.047549 | 0.678537 |
| SKAP1    | 0.364097 | 0.331324 | -0.13608 | 0.176114 |
| CCNL2    | 0.447182 | 0.446607 | -0.00185 | 0.879701 |
| HNRNPUL  | 0.284177 | 0.282564 | -0.00821 | 0.959146 |
| CYP4F22  | 0.2386   | 0.248108 | 0.056376 | 0.21631  |
| SNORD47  | 0.432539 | 0.387368 | -0.15912 | 0.012807 |
| SLC4A5   | 0.525807 | 0.518636 | -0.01981 | 0.13617  |
| THRB     | 0.297648 | 0.301847 | 0.02021  | 0.501    |
| ZNF133   | 0.150076 | 0.14842  | -0.016   | 0.593885 |
| DEFA1B   | 0.34775  | 0.337229 | -0.04432 | 0.403208 |
| RPL8     | 0.163438 | 0.154973 | -0.07672 | 0.257794 |
| PDF      | 0.409059 | 0.398686 | -0.03706 | 0.397987 |
| TOX      | 0.373669 | 0.38036  | 0.025603 | 0.628162 |
| FBXO39   | 0.116623 | 0.116089 | -0.00662 | 0.77101  |
| LRRC42   | 0.161278 | 0.156159 | -0.04653 | 0.284134 |
| GNG2     | 0.523745 | 0.530398 | 0.018211 | 0.306695 |
| WNK3     | 0.128345 | 0.14906  | 0.215862 | 0.552679 |
| AFARP1   | 0.899654 | 0.891326 | -0.01342 | 0.001737 |
| NPAS2    | 0.32215  | 0.340925 | 0.081721 | 0.228668 |
| ITGB4    | 0.424715 | 0.428403 | 0.012476 | 0.84311  |
| PEX5L    | 0.346138 | 0.366012 | 0.080542 | 0.10214  |
| MAST3    | 0.443996 | 0.438911 | -0.01662 | 0.265711 |
| OR2A14   | 0.467546 | 0.461671 | -0.01824 | 0.846756 |
| NID1     | 0.395663 | 0.408034 | 0.044417 | 0.276869 |
| COG2     | 0.457608 | 0.446321 | -0.03603 | 0.090943 |
| MYL3     | 0.722236 | 0.669065 | -0.11032 | 0.007413 |
| PLA2G4E  | 0.456706 | 0.428734 | -0.09118 | 0.030533 |
| ATL3     | 0.323516 | 0.316834 | -0.03011 | 0.51593  |
| CITED2   | 0.04577  | 0.045188 | -0.01844 | 0.732128 |
| RNF213   | 0.64416  | 0.637879 | -0.01414 | 0.095944 |

|          |          |          |          |          |
|----------|----------|----------|----------|----------|
| CUX2     | 0.448019 | 0.43976  | -0.02684 | 0.301217 |
| SIX5     | 0.120851 | 0.122295 | 0.017134 | 0.67343  |
| MYL12A   | 0.174816 | 0.173438 | -0.01142 | 0.649796 |
| KCNJ9    | 0.325021 | 0.326521 | 0.006643 | 0.942458 |
| PRHOXNB  | 0.167961 | 0.174992 | 0.059159 | 0.555799 |
| CXCR2    | 0.27089  | 0.260837 | -0.05456 | 0.254868 |
| MAK      | 0.308564 | 0.321443 | 0.058997 | 0.292592 |
| SIX1     | 0.08285  | 0.078982 | -0.06898 | 0.171686 |
| ZDHH19   | 0.387631 | 0.382001 | -0.02111 | 0.408466 |
| CAB39    | 0.473885 | 0.47261  | -0.00389 | 0.834012 |
| IRX2     | 0.106338 | 0.114939 | 0.112211 | 0.058046 |
| TMX1     | 0.10269  | 0.104416 | 0.024047 | 0.409787 |
| C9orf114 | 0.16422  | 0.161325 | -0.02566 | 0.888892 |
| P2RX1    | 0.475235 | 0.443199 | -0.10069 | 7.12E-05 |
| TMEM130  | 0.212521 | 0.212168 | -0.0024  | 0.961001 |
| CATSPER4 | 0.540374 | 0.531433 | -0.02407 | 0.443644 |
| F2R      | 0.23437  | 0.248856 | 0.086526 | 0.262723 |
| TH       | 0.509485 | 0.550427 | 0.111513 | 0.003274 |
| C12orf11 | 0.053636 | 0.054216 | 0.01553  | 0.716427 |
| ROPN1    | 0.206746 | 0.200324 | -0.04553 | 0.356498 |
| WNT6     | 0.234293 | 0.231639 | -0.01644 | 0.852229 |
| IFIH1    | 0.216306 | 0.218052 | 0.0116   | 0.659884 |
| CRYGB    | 0.474611 | 0.478655 | 0.01224  | 0.263716 |
| SAFB     | 0.507986 | 0.50179  | -0.0177  | 0.377518 |
| GPR160   | 0.437387 | 0.461162 | 0.076363 | 0.022224 |
| PI16     | 0.710587 | 0.70351  | -0.01444 | 0.150813 |
| TMEM80   | 0.172966 | 0.173829 | 0.007178 | 0.718169 |
| GOLGA6L5 | 0.81949  | 0.814438 | -0.00892 | 0.267711 |
| EML3     | 0.257646 | 0.25788  | 0.001311 | 0.914703 |
| CMAH     | 0.42552  | 0.415182 | -0.03548 | 0.656514 |
| LOC44089 | 0.233268 | 0.24811  | 0.08899  | 0.050479 |
| RCN2     | 0.041208 | 0.038184 | -0.10997 | 0.054427 |
| EYA4     | 0.199409 | 0.211974 | 0.08816  | 0.167353 |
| ZNF362   | 0.390655 | 0.391701 | 0.003859 | 0.735647 |
| CLCA4    | 0.438176 | 0.458665 | 0.065929 | 0.139883 |
| LOC10013 | 0.899879 | 0.905299 | 0.008663 | 0.446389 |
| POLD3    | 0.287308 | 0.294661 | 0.036459 | 0.08321  |
| VARS     | 0.527283 | 0.52079  | -0.01788 | 0.316717 |
| ATP1B1   | 0.18972  | 0.195155 | 0.04075  | 0.039558 |
| LOC10013 | 0.5292   | 0.546664 | 0.046839 | 0.204443 |
| UNC80    | 0.570185 | 0.57558  | 0.013588 | 0.439496 |
| SHE      | 0.431186 | 0.357138 | -0.27183 | 0.003225 |
| RPL29    | 0.085595 | 0.081272 | -0.07477 | 0.434005 |
| MCART2   | 0.712643 | 0.731193 | 0.037072 | 0.388947 |
| HERC2P4  | 0.663824 | 0.675311 | 0.024753 | 0.868693 |
| ATP6V1E1 | 0.106608 | 0.111215 | 0.061028 | 0.356498 |
| LY6D     | 0.618665 | 0.589518 | -0.06962 | 0.044244 |
| PTN      | 0.453645 | 0.455914 | 0.0072   | 0.912856 |
| CNPY1    | 0.158118 | 0.135308 | -0.22475 | 0.00126  |
| KCNMB4   | 0.202444 | 0.203433 | 0.007033 | 0.790669 |
| C10orf25 | 0.073578 | 0.076602 | 0.058118 | 0.196255 |
| MPHOSPH  | 0.699027 | 0.704533 | 0.011319 | 0.4534   |
| NOTCH2N  | 0.144268 | 0.148011 | 0.03695  | 0.521965 |
| NPB      | 0.135462 | 0.158367 | 0.225382 | 0.126071 |
| NEGR1    | 0.24098  | 0.242779 | 0.010735 | 0.84311  |
| INGX     | 0.540559 | 0.50414  | -0.10063 | 0.284134 |

|          |          |          |          |          |
|----------|----------|----------|----------|----------|
| DPPA4    | 0.438285 | 0.461331 | 0.073932 | 0.098768 |
| C5       | 0.568834 | 0.585952 | 0.042776 | 0.716429 |
| RUFY4    | 0.372284 | 0.346662 | -0.10287 | 0.007781 |
| EFCAB2   | 0.360986 | 0.357982 | -0.01206 | 0.649797 |
| ALDH3B2  | 0.372761 | 0.381738 | 0.03433  | 0.746201 |
| GTF2A1   | 0.170479 | 0.17673  | 0.051951 | 0.04046  |
| SUGT1    | 0.167503 | 0.168534 | 0.008855 | 0.451997 |
| SMARCA2  | 0.288884 | 0.300224 | 0.055545 | 0.14819  |
| UBE2D4   | 0.519756 | 0.528665 | 0.024519 | 0.755033 |
| PATL2    | 0.522762 | 0.489746 | -0.09412 | 0.214585 |
| IL6R     | 0.301738 | 0.280258 | -0.10654 | 0.120965 |
| MUT      | 0.870841 | 0.897329 | 0.043229 | 0.136147 |
| TRIM47   | 0.248936 | 0.237051 | -0.07058 | 0.061521 |
| IFNAR2   | 0.119401 | 0.118672 | -0.00884 | 0.933196 |
| XPO6     | 0.450696 | 0.457692 | 0.02222  | 0.361376 |
| CEBPB    | 0.116997 | 0.116941 | -0.00069 | 0.920247 |
| LOC28573 | 0.352193 | 0.405596 | 0.203678 | 0.122649 |
| KLHL4    | 0.13345  | 0.145261 | 0.122346 | 0.503968 |
| BBS7     | 0.076283 | 0.074354 | -0.03694 | 0.4534   |
| MIR591   | 0.705745 | 0.695776 | -0.02052 | 0.521963 |
| PIR      | 0.18074  | 0.190547 | 0.076226 | 0.062827 |
| RAB43    | 0.206599 | 0.200351 | -0.04431 | 0.179107 |
| LOC10030 | 0.223083 | 0.222711 | -0.00241 | 0.357713 |
| FOXD4L1  | 0.343208 | 0.366164 | 0.093408 | 0.053286 |
| RLF      | 0.073401 | 0.077056 | 0.070104 | 0.070059 |
| SNRPA1   | 0.149595 | 0.142882 | -0.06624 | 0.113344 |
| BIN2     | 0.765653 | 0.751278 | -0.02734 | 0.139876 |
| SNORA57  | 0.039664 | 0.040016 | 0.012764 | 0.442237 |
| OR10AD1  | 0.492711 | 0.462719 | -0.0906  | 0.007517 |
| UPF3A    | 0.206282 | 0.206678 | 0.002765 | 0.755032 |
| TLR7     | 0.339384 | 0.313518 | -0.11437 | 0.27687  |
| VIP      | 0.591732 | 0.576957 | -0.03648 | 0.543373 |
| SNTG1    | 0.354651 | 0.38508  | 0.118756 | 0.083211 |
| SLC25A30 | 0.266905 | 0.27429  | 0.03938  | 0.276869 |
| LOC28584 | 0.275745 | 0.27444  | -0.00684 | 0.931345 |
| CAPN10   | 0.465348 | 0.463662 | -0.00524 | 0.796054 |
| LMAN1    | 0.268603 | 0.266898 | -0.00919 | 0.540288 |
| THSD4    | 0.525191 | 0.51084  | -0.03997 | 0.099244 |
| NAV1     | 0.397076 | 0.386619 | -0.03851 | 0.091837 |
| ALDH7A1  | 0.174556 | 0.162824 | -0.10038 | 0.317845 |
| TOB1     | 0.315262 | 0.324588 | 0.042059 | 0.078754 |
| TAS2R10  | 0.821919 | 0.865526 | 0.074583 | 0.206931 |
| ZNF652   | 0.330389 | 0.333285 | 0.012592 | 0.476153 |
| EIF3I    | 0.152694 | 0.158066 | 0.049889 | 0.285183 |
| SLC8A2   | 0.353891 | 0.341779 | -0.05024 | 0.219792 |
| COMMD4   | 0.150366 | 0.132154 | -0.18626 | 0.0905   |
| KATNB1   | 0.28457  | 0.281983 | -0.01317 | 0.421796 |
| FGD5     | 0.641592 | 0.632135 | -0.02142 | 0.295803 |
| RAD50    | 0.150369 | 0.15948  | 0.084874 | 0.004277 |
| GNG4     | 0.296033 | 0.290022 | -0.02959 | 0.24528  |
| LOC40264 | 0.729697 | 0.743556 | 0.027143 | 0.150156 |
| PIGQ     | 0.392184 | 0.387769 | -0.01633 | 0.297963 |
| DSC3     | 0.113382 | 0.111574 | -0.02319 | 0.922096 |
| OAT      | 0.239793 | 0.23828  | -0.00913 | 0.397986 |
| KIAA1530 | 0.568567 | 0.567191 | -0.0035  | 0.639771 |
| SLC25A31 | 0.650127 | 0.662622 | 0.027464 | 0.244334 |

|            |          |          |          |          |
|------------|----------|----------|----------|----------|
| PNLIPRP2   | 0.57499  | 0.56735  | -0.0193  | 0.535673 |
| AGR3       | 0.369127 | 0.40197  | 0.122972 | 0.188321 |
| SULT4A1    | 0.173892 | 0.178196 | 0.035275 | 0.31001  |
| C6orf106   | 0.380565 | 0.391451 | 0.040689 | 0.133741 |
| C1orf157   | 0.614229 | 0.644687 | 0.069823 | 0.256816 |
| TBC1D19    | 0.316949 | 0.312214 | -0.02172 | 0.233198 |
| RECQL5     | 0.463887 | 0.466033 | 0.006661 | 0.912856 |
| ALKBH7     | 0.076437 | 0.08     | 0.065724 | 0.479038 |
| MTMR4      | 0.142848 | 0.145995 | 0.031438 | 0.103122 |
| CLEC2L     | 0.321471 | 0.324424 | 0.013188 | 0.404518 |
| FCGRT      | 0.379095 | 0.377016 | -0.00793 | 0.554237 |
| ZFP112     | 0.203856 | 0.210842 | 0.04861  | 0.225087 |
| TTC23L     | 0.213298 | 0.220537 | 0.048148 | 0.079949 |
| C17orf74   | 0.581016 | 0.571928 | -0.02274 | 0.46328  |
| C20orf26   | 0.230719 | 0.224526 | -0.03925 | 0.46328  |
| UBE2G1     | 0.152223 | 0.153958 | 0.016343 | 0.397986 |
| C16orf54   | 0.626496 | 0.602987 | -0.05518 | 0.266714 |
| C9orf130   | 0.058018 | 0.054784 | -0.08273 | 0.120404 |
| DCUN1D1    | 0.290006 | 0.287131 | -0.01437 | 0.656514 |
| PROSC      | 0.170542 | 0.172764 | 0.018669 | 0.386393 |
| GPR107     | 0.36618  | 0.36392  | -0.00893 | 0.562063 |
| C14orf34   | 0.69192  | 0.715352 | 0.048047 | 0.659882 |
| BCORL1     | 0.292563 | 0.307354 | 0.071154 | 0.165215 |
| UGT3A1     | 0.334145 | 0.307694 | -0.11898 | 0.555799 |
| SEMA6A     | 0.4666   | 0.472864 | 0.01924  | 0.257794 |
| LSM6       | 0.313295 | 0.307772 | -0.02566 | 0.270746 |
| TSR2       | 0.186248 | 0.191345 | 0.038946 | 0.4151   |
| DEFB110    | 0.261673 | 0.320204 | 0.291229 | 0.009299 |
| TBX19      | 0.472519 | 0.476412 | 0.011838 | 0.502482 |
| MKX        | 0.096832 | 0.096721 | -0.00166 | 0.824935 |
| C10orf57   | 0.157458 | 0.162318 | 0.043862 | 0.207784 |
| POTED      | 0.25554  | 0.26564  | 0.055923 | 0.429914 |
| MIR654     | 0.790594 | 0.785703 | -0.00895 | 0.812264 |
| GJB4       | 0.574041 | 0.563854 | -0.02583 | 0.274815 |
| FLJ40852   | 0.223512 | 0.203106 | -0.13812 | 0.007011 |
| WDR64      | 0.554173 | 0.586862 | 0.082684 | 0.015753 |
| JDP2       | 0.512074 | 0.504191 | -0.02238 | 0.185212 |
| RP11.529I1 | 0.198909 | 0.201776 | 0.02065  | 0.453402 |
| ARSI       | 0.590695 | 0.553412 | -0.09406 | 0.012312 |
| LOC72887   | 0.173093 | 0.177126 | 0.033229 | 0.532613 |
| MYL6       | 0.224036 | 0.235455 | 0.071721 | 0.155507 |
| XBP1       | 0.12431  | 0.126872 | 0.029441 | 0.628162 |
| GPR128     | 0.402609 | 0.467041 | 0.214167 | 0.004601 |
| ELF5       | 0.706025 | 0.688422 | -0.03643 | 0.140505 |
| ZP4        | 0.549654 | 0.569608 | 0.051446 | 0.081565 |
| CABYR      | 0.214774 | 0.215067 | 0.001968 | 0.923945 |
| LIN54      | 0.136017 | 0.137529 | 0.015948 | 0.302308 |
| NOP2       | 0.182303 | 0.182175 | -0.00102 | 0.776357 |
| TTLL4      | 0.232828 | 0.22628  | -0.04116 | 0.120965 |
| SFRS16     | 0.657492 | 0.655754 | -0.00382 | 0.923944 |
| RFPL1S     | 0.573388 | 0.552619 | -0.05323 | 0.010152 |
| KSR2       | 0.408154 | 0.400829 | -0.02612 | 0.281003 |
| MAGEA6     | 0.793892 | 0.768896 | -0.04615 | 0.212012 |
| TRA2A      | 0.145206 | 0.141761 | -0.03464 | 0.324657 |
| TJP2       | 0.337326 | 0.366104 | 0.118109 | 0.018686 |
| CECR1      | 0.184059 | 0.181072 | -0.02361 | 0.817692 |

|          |          |          |          |          |
|----------|----------|----------|----------|----------|
| STS      | 0.422568 | 0.418023 | -0.0156  | 0.721653 |
| TMSB4X   | 0.102939 | 0.115329 | 0.163962 | 0.134952 |
| LOC64371 | 0.292641 | 0.342162 | 0.225545 | 0.030532 |
| FIP1L1   | 0.295605 | 0.296908 | 0.006346 | 0.961001 |
| C19orf77 | 0.405455 | 0.377685 | -0.10236 | 0.224198 |
| PPHLN1   | 0.168893 | 0.172018 | 0.026451 | 0.301218 |
| PART1    | 0.285733 | 0.280215 | -0.02813 | 0.387671 |
| FAM123C  | 0.316193 | 0.317693 | 0.006826 | 0.765673 |
| FAF1     | 0.306678 | 0.312708 | 0.028092 | 0.623215 |
| KIAA1958 | 0.031849 | 0.031099 | -0.03439 | 0.449174 |
| AHNAK2   | 0.535322 | 0.515287 | -0.05503 | 0.097348 |
| C17orf65 | 0.796097 | 0.789009 | -0.0129  | 0.377514 |
| FST      | 0.110814 | 0.109134 | -0.02203 | 0.905473 |
| C1QA     | 0.392118 | 0.367535 | -0.09341 | 0.033322 |
| FKBP1A   | 0.216329 | 0.212172 | -0.02799 | 0.365061 |
| C11orf52 | 0.671764 | 0.653897 | -0.03889 | 0.200319 |
| OR9Q2    | 0.225901 | 0.209473 | -0.10892 | 0.182141 |
| COPS4    | 0.089835 | 0.085749 | -0.06715 | 0.508435 |
| KRT9     | 0.338384 | 0.323709 | -0.06396 | 0.506944 |
| ATXN10   | 0.154169 | 0.152258 | -0.01799 | 0.914703 |
| IDH3B    | 0.096226 | 0.096603 | 0.005647 | 0.585852 |
| HGS      | 0.598486 | 0.595959 | -0.0061  | 0.692227 |
| FUT1     | 0.423431 | 0.414991 | -0.02905 | 0.506943 |
| GOLGA8D  | 0.336749 | 0.326044 | -0.04661 | 0.460446 |
| PYGO1    | 0.087466 | 0.085093 | -0.03968 | 0.173889 |
| LOC10028 | 0.76576  | 0.744138 | -0.04132 | 0.049121 |
| CYHR1    | 0.359966 | 0.362298 | 0.009315 | 0.466123 |
| CST11    | 0.425277 | 0.442898 | 0.058572 | 0.357714 |
| ODZ4     | 0.483888 | 0.475753 | -0.02446 | 0.237794 |
| MEI1     | 0.419133 | 0.409651 | -0.03301 | 0.486302 |
| CHST2    | 0.235991 | 0.261545 | 0.148328 | 0.026645 |
| BMP4     | 0.140237 | 0.136456 | -0.03942 | 0.606844 |
| NCRNA00  | 0.663863 | 0.570589 | -0.21843 | 0.05992  |
| MOGAT3   | 0.268348 | 0.280818 | 0.065527 | 0.295808 |
| MIR559   | 0.756724 | 0.77502  | 0.034467 | 0.267716 |
| DNAJC10  | 0.116411 | 0.119753 | 0.040843 | 0.362602 |
| NUP37    | 0.38751  | 0.402334 | 0.054162 | 0.233199 |
| COQ5     | 0.154489 | 0.155954 | 0.013617 | 0.558926 |
| FAM24B   | 0.543057 | 0.551947 | 0.023426 | 0.248127 |
| C18orf8  | 0.079354 | 0.083209 | 0.068445 | 0.224196 |
| APC      | 0.071358 | 0.072699 | 0.026858 | 0.089158 |
| DSCAM    | 0.460528 | 0.465615 | 0.015846 | 0.295806 |
| NOX4     | 0.155629 | 0.161858 | 0.056617 | 0.557362 |
| MIR519D  | 0.086769 | 0.085993 | -0.01297 | 0.739159 |
| DAPP1    | 0.568156 | 0.553619 | -0.03739 | 0.445031 |
| GLI4     | 0.164655 | 0.166753 | 0.01827  | 0.538748 |
| LOC10021 | 0.316913 | 0.305001 | -0.05527 | 0.026171 |
| C10orf62 | 0.655372 | 0.655055 | -0.0007  | 0.792463 |
| GGA1     | 0.185356 | 0.180463 | -0.0386  | 0.306694 |
| MS4A15   | 0.394007 | 0.380848 | -0.049   | 0.244336 |
| SNORA14  | 0.908591 | 0.903703 | -0.00778 | 0.032357 |
| PPM1J    | 0.227756 | 0.220052 | -0.04964 | 0.10968  |
| RGPD1    | 0.570883 | 0.597293 | 0.065245 | 0.218917 |
| CACNB2   | 0.333435 | 0.319779 | -0.06033 | 0.083626 |
| BICD1    | 0.272341 | 0.271397 | -0.00501 | 0.704291 |
| GAS2L1   | 0.323113 | 0.317328 | -0.02606 | 0.589061 |

|           |          |          |          |          |
|-----------|----------|----------|----------|----------|
| C11orf82  | 0.203592 | 0.201685 | -0.01358 | 0.66326  |
| FLJ42709  | 0.377025 | 0.388427 | 0.042986 | 0.464701 |
| C10orf104 | 0.654571 | 0.662128 | 0.01656  | 0.425841 |
| C7orf53   | 0.658005 | 0.65549  | -0.00553 | 0.643106 |
| RAB42     | 0.398192 | 0.400694 | 0.009035 | 0.626511 |
| RAB34     | 0.391248 | 0.358559 | -0.12587 | 0.185212 |
| SLAIN2    | 0.38346  | 0.397219 | 0.050857 | 0.073737 |
| LOC91316  | 0.455974 | 0.457094 | 0.00354  | 0.835829 |
| SPTB      | 0.545904 | 0.543604 | -0.00609 | 0.639772 |
| HERC5     | 0.138478 | 0.149566 | 0.111128 | 0.00706  |
| TCF23     | 0.685817 | 0.667897 | -0.0382  | 0.029301 |
| SLC36A2   | 0.36369  | 0.343541 | -0.08222 | 0.245281 |
| OR1E2     | 0.113103 | 0.117739 | 0.057959 | 0.552679 |
| C17orf61  | 0.064117 | 0.066855 | 0.060334 | 0.126068 |
| LOC72844  | 0.641758 | 0.655519 | 0.030608 | 0.310012 |
| KCNC1     | 0.576378 | 0.568528 | -0.01978 | 0.143667 |
| C1orf95   | 0.211578 | 0.198481 | -0.09219 | 0.002945 |
| CCDC134   | 0.091117 | 0.092415 | 0.020395 | 0.368765 |
| CEACAM2   | 0.166244 | 0.161463 | -0.0421  | 0.435376 |
| NFXL1     | 0.079259 | 0.08064  | 0.024917 | 0.626509 |
| NAPSA     | 0.452671 | 0.427477 | -0.08261 | 0.14051  |
| GPNMB     | 0.413716 | 0.407012 | -0.02357 | 0.257795 |
| LDLR      | 0.374243 | 0.36756  | -0.02599 | 0.790669 |
| C9orf150  | 0.059944 | 0.057803 | -0.05246 | 0.46327  |
| CHPF      | 0.397731 | 0.387269 | -0.03846 | 0.047534 |
| EPHA3     | 0.171234 | 0.187491 | 0.130853 | 0.147537 |
| HPD       | 0.349985 | 0.334782 | -0.06407 | 0.067228 |
| PSTPIP1   | 0.654097 | 0.644723 | -0.02083 | 0.12378  |
| ATP7B     | 0.388607 | 0.381741 | -0.02572 | 0.266711 |
| LOC44120  | 0.391616 | 0.390432 | -0.00437 | 0.894414 |
| NTM       | 0.576287 | 0.55341  | -0.05844 | 0.005836 |
| STAMBP    | 0.187663 | 0.187965 | 0.002315 | 0.86503  |
| KIAA0408  | 0.394903 | 0.398188 | 0.01195  | 0.760347 |
| SMO       | 0.194156 | 0.195561 | 0.0104   | 0.322376 |
| HPSE      | 0.063966 | 0.067432 | 0.076132 | 0.042552 |
| TTY10     | 0.577045 | 0.524513 | -0.13771 | 0.450524 |
| NLGN4Y    | 0.31244  | 0.300386 | -0.05676 | 0.362603 |
| B3GAT3    | 0.116042 | 0.117448 | 0.017375 | 0.399287 |
| OR2AG2    | 0.592892 | 0.635509 | 0.100143 | 0.278931 |
| RDH14     | 0.119426 | 0.121002 | 0.018919 | 0.268722 |
| PHGR1     | 0.497253 | 0.481611 | -0.04611 | 0.007675 |
| MBL2      | 0.439529 | 0.473358 | 0.106976 | 0.031256 |
| OR51B6    | 0.268456 | 0.279339 | 0.05733  | 0.562063 |
| GAPT      | 0.547124 | 0.558322 | 0.029228 | 0.318973 |
| OR6C76    | 0.662819 | 0.733245 | 0.145679 | 0.082382 |
| C8orf79   | 0.43636  | 0.432176 | -0.0139  | 0.600348 |
| OR11H6    | 0.111341 | 0.104675 | -0.08906 | 0.15755  |
| PPP4R1L   | 0.447877 | 0.444275 | -0.01165 | 0.812268 |
| TSSK1B    | 0.783922 | 0.773401 | -0.01949 | 0.130739 |
| SLC30A7   | 0.112937 | 0.115073 | 0.027037 | 0.279963 |
| ZNF131    | 0.089816 | 0.090814 | 0.01595  | 0.571521 |
| ZNF267    | 0.179783 | 0.180594 | 0.006491 | 0.57628  |
| EGF       | 0.42225  | 0.446458 | 0.080426 | 0.306695 |
| CTNS      | 0.454571 | 0.460383 | 0.01833  | 0.918398 |
| FREM2     | 0.215139 | 0.234638 | 0.125172 | 0.102141 |
| CBLC      | 0.232153 | 0.235328 | 0.019597 | 0.68195  |

|          |          |          |          |          |
|----------|----------|----------|----------|----------|
| OR1K1    | 0.786572 | 0.773642 | -0.02391 | 0.400588 |
| ZNF449   | 0.259779 | 0.275821 | 0.086448 | 0.23687  |
| FBXO24   | 0.122686 | 0.124226 | 0.017992 | 0.626512 |
| HLA.J    | 0.197699 | 0.198554 | 0.006228 | 0.753264 |
| GATA3    | 0.258138 | 0.260593 | 0.013652 | 0.890733 |
| CCDC82   | 0.139191 | 0.14409  | 0.049904 | 0.340931 |
| SPAST    | 0.183675 | 0.186085 | 0.018803 | 0.447809 |
| LOC28480 | 0.709706 | 0.684342 | -0.0525  | 0.068987 |
| MKKS     | 0.268609 | 0.276353 | 0.041006 | 0.192259 |
| ARHGAP3C | 0.450518 | 0.429068 | -0.07038 | 0.123782 |
| PRRT2    | 0.135595 | 0.148385 | 0.13004  | 0.030712 |
| GSTTP2   | 0.566343 | 0.546901 | -0.0504  | 0.108651 |
| MKLN1    | 0.225024 | 0.225344 | 0.002049 | 0.907318 |
| LCNL1    | 0.582368 | 0.561754 | -0.05199 | 0.46755  |
| KCNV2    | 0.803352 | 0.7999   | -0.00621 | 0.511418 |
| LOC20165 | 0.399973 | 0.468763 | 0.228955 | 0.009111 |
| MIR449C  | 0.09642  | 0.089453 | -0.1082  | 0.049661 |
| EVX2     | 0.070262 | 0.066274 | -0.08429 | 0.052712 |
| MRPS2    | 0.292661 | 0.291053 | -0.00795 | 0.77101  |
| PDGFA    | 0.316208 | 0.357795 | 0.178261 | 0.055922 |
| P4HA1    | 0.169608 | 0.174068 | 0.037443 | 0.162395 |
| ANKRD36  | 0.087293 | 0.08627  | -0.01702 | 0.797852 |
| C18orf34 | 0.248766 | 0.251895 | 0.018034 | 0.964713 |
| ELK3     | 0.406966 | 0.403059 | -0.01392 | 0.464698 |
| MESP2    | 0.550876 | 0.553676 | 0.007317 | 0.593886 |
| TMEM2    | 0.101459 | 0.098366 | -0.04466 | 0.351659 |
| AKR7L    | 0.451504 | 0.453225 | 0.00549  | 0.824936 |
| HHAT     | 0.309803 | 0.303787 | -0.02829 | 0.267718 |
| RGS21    | 0.796329 | 0.838107 | 0.073769 | 0.146879 |
| WFIKK2   | 0.478379 | 0.447362 | -0.09671 | 0.027127 |
| MT1B     | 0.425802 | 0.41952  | -0.02144 | 0.459031 |
| CEL      | 0.633772 | 0.645843 | 0.02722  | 0.131938 |
| MIRLET7G | 0.917993 | 0.928427 | 0.016305 | 0.178283 |
| PHYHIP   | 0.582002 | 0.577334 | -0.01162 | 0.557362 |
| FCRL2    | 0.345053 | 0.319864 | -0.10936 | 0.171692 |
| RALY     | 0.190908 | 0.189914 | -0.00753 | 0.4506   |
| FBLN2    | 0.456023 | 0.452215 | -0.0121  | 0.424491 |
| SOX11    | 0.119286 | 0.111258 | -0.10051 | 0.041846 |
| ZMAT5    | 0.317413 | 0.311881 | -0.02536 | 0.227768 |
| C11orf83 | 0.071919 | 0.07598  | 0.079241 | 0.046245 |
| REXO1    | 0.540526 | 0.534896 | -0.01511 | 0.442259 |
| ZNF385A  | 0.462557 | 0.456457 | -0.01915 | 0.124922 |
| ALG8     | 0.045389 | 0.044514 | -0.0281  | 0.577858 |
| PTRF     | 0.263312 | 0.241274 | -0.1261  | 0.036743 |
| C16orf35 | 0.313007 | 0.307003 | -0.02795 | 0.358931 |
| NR2F1    | 0.324571 | 0.327924 | 0.014827 | 0.896256 |
| APOM     | 0.499286 | 0.503795 | 0.012969 | 0.524993 |
| CCDC59   | 0.149326 | 0.15379  | 0.042494 | 0.370011 |
| ERO1LB   | 0.170188 | 0.167595 | -0.02215 | 0.345672 |
| APOC2    | 0.416531 | 0.426842 | 0.035277 | 0.610103 |
| IQCD     | 0.199779 | 0.19239  | -0.05437 | 0.474715 |
| TMEM202  | 0.183881 | 0.17497  | -0.07167 | 0.367534 |
| APH1B    | 0.095201 | 0.099321 | 0.061135 | 0.18367  |
| SCAF1    | 0.446782 | 0.442071 | -0.01529 | 0.509927 |
| MRPS10   | 0.223437 | 0.232422 | 0.056878 | 0.177605 |
| GHRLOS   | 0.665069 | 0.706433 | 0.087048 | 0.041146 |

|           |          |          |          |          |
|-----------|----------|----------|----------|----------|
| PSME2     | 0.175992 | 0.179212 | 0.02616  | 0.296883 |
| RBMS3     | 0.414972 | 0.412689 | -0.00796 | 0.615005 |
| GAGE5     | 0.314281 | 0.338559 | 0.107354 | 0.077572 |
| TUFM      | 0.120935 | 0.122392 | 0.017274 | 0.634784 |
| CPNE8     | 0.223218 | 0.209461 | -0.09177 | 0.826749 |
| EFCAB5    | 0.19496  | 0.193857 | -0.00818 | 0.683658 |
| FGD6      | 0.315724 | 0.30979  | -0.02737 | 0.526516 |
| PPP1R14D  | 0.461503 | 0.445455 | -0.05106 | 0.476154 |
| UPB1      | 0.560111 | 0.555781 | -0.01119 | 0.760347 |
| KRT33B    | 0.309597 | 0.284436 | -0.12229 | 0.02586  |
| C1orf175  | 0.310649 | 0.299563 | -0.05243 | 0.069343 |
| MIR517A   | 0.2427   | 0.281163 | 0.212236 | 0.07188  |
| DOCK7     | 0.401156 | 0.41016  | 0.032022 | 0.890732 |
| KDELR3    | 0.317396 | 0.309862 | -0.03466 | 0.263716 |
| NR2E1     | 0.224434 | 0.208426 | -0.10675 | 0.383845 |
| GPR114    | 0.313185 | 0.29877  | -0.06798 | 0.128394 |
| ZNF761    | 0.268759 | 0.276126 | 0.039015 | 0.226872 |
| TMEM185f  | 0.290778 | 0.293591 | 0.013888 | 0.331569 |
| KLHL34    | 0.635816 | 0.686804 | 0.111288 | 0.103122 |
| YPEL2     | 0.307103 | 0.296094 | -0.05267 | 0.143671 |
| LOC100121 | 0.294948 | 0.328198 | 0.154107 | 0.466125 |
| LILRA4    | 0.208766 | 0.199926 | -0.06242 | 0.163097 |
| MIR632    | 0.07813  | 0.075289 | -0.05344 | 0.461862 |
| CDON      | 0.202375 | 0.201442 | -0.00666 | 0.916551 |
| LIPA      | 0.216725 | 0.227478 | 0.069864 | 0.069342 |
| C4orf27   | 0.050698 | 0.049487 | -0.03488 | 0.382569 |
| HSPA7     | 0.276448 | 0.294958 | 0.093502 | 0.135562 |
| LOC72855  | 0.037632 | 0.038372 | 0.0281   | 0.332708 |
| NDUFAF4   | 0.114374 | 0.112494 | -0.02392 | 0.460438 |
| C2orf82   | 0.387449 | 0.407247 | 0.071896 | 0.009816 |
| MYO1D     | 0.37097  | 0.367117 | -0.01506 | 0.325804 |
| LYPD5     | 0.140896 | 0.149227 | 0.08288  | 0.584251 |
| BCKDHA    | 0.177565 | 0.176337 | -0.01001 | 0.76923  |
| ALKBH6    | 0.129643 | 0.127533 | -0.02367 | 0.287281 |
| CCDC57    | 0.583498 | 0.578684 | -0.01195 | 0.323516 |
| NCRNA000  | 0.248575 | 0.266608 | 0.10104  | 0.286233 |
| PLEKHG7   | 0.680766 | 0.6873   | 0.013781 | 0.711216 |
| HIST1H2B  | 0.870913 | 0.882248 | 0.018656 | 0.70255  |
| LOC10028  | 0.430415 | 0.470692 | 0.129053 | 0.087871 |
| TAF9      | 0.137146 | 0.137931 | 0.008235 | 0.354073 |
| CRH       | 0.200622 | 0.182662 | -0.1353  | 0.056221 |
| C7orf20   | 0.639859 | 0.631831 | -0.01821 | 0.151481 |
| FAM183A   | 0.279165 | 0.266654 | -0.06615 | 0.093191 |
| FAM198B   | 0.448358 | 0.436514 | -0.03862 | 0.848579 |
| TCEAL7    | 0.226164 | 0.224069 | -0.01342 | 0.308904 |
| C17orf75  | 0.153252 | 0.155568 | 0.021639 | 0.537211 |
| FGD2      | 0.635625 | 0.603272 | -0.07537 | 0.002627 |
| RNF217    | 0.306422 | 0.354091 | 0.208599 | 0.024793 |
| TDRD10    | 0.317845 | 0.302814 | -0.06989 | 0.107628 |
| SDR39U1   | 0.10227  | 0.102377 | 0.001522 | 0.605217 |
| MARVELD3  | 0.423544 | 0.418296 | -0.01799 | 0.557362 |
| C6orf223  | 0.487535 | 0.451549 | -0.11063 | 0.003274 |
| PAX4      | 0.630303 | 0.610204 | -0.04675 | 0.214584 |
| TMEM54    | 0.14478  | 0.142727 | -0.02061 | 0.771008 |
| STK31     | 0.725071 | 0.720402 | -0.00932 | 0.279963 |
| TMEM30A   | 0.150975 | 0.151233 | 0.002459 | 0.988853 |

|           |          |          |          |          |
|-----------|----------|----------|----------|----------|
| SLC9A3R2  | 0.549283 | 0.538478 | -0.02866 | 0.331568 |
| ZMAT4     | 0.365537 | 0.35549  | -0.04021 | 0.091836 |
| KRTAP12.4 | 0.231483 | 0.239831 | 0.051115 | 0.506945 |
| SSR4      | 0.647015 | 0.628975 | -0.0408  | 0.253897 |
| GLYCAM1   | 0.391733 | 0.360872 | -0.11838 | 0.242455 |
| SNORD11f  | 0.412374 | 0.395255 | -0.06117 | 0.285183 |
| TNKS2     | 0.201761 | 0.203572 | 0.012895 | 0.616644 |
| NGF       | 0.269031 | 0.261113 | -0.0431  | 0.366297 |
| INTS4L1   | 0.153117 | 0.155467 | 0.021978 | 0.590667 |
| IKZF3     | 0.230335 | 0.232101 | 0.011016 | 0.826749 |
| LYPD2     | 0.689333 | 0.656057 | -0.07138 | 0.104109 |
| HSPB3     | 0.356566 | 0.407992 | 0.194369 | 0.024644 |
| FANCI     | 0.311924 | 0.312939 | 0.004688 | 0.865029 |
| ZNF214    | 0.158899 | 0.163227 | 0.038766 | 0.314471 |
| WDHD1     | 0.115973 | 0.121638 | 0.068814 | 0.275841 |
| PLCH1     | 0.454301 | 0.462164 | 0.024758 | 0.132538 |
| SMC4      | 0.185588 | 0.182492 | -0.02427 | 0.534145 |
| COPA      | 0.194117 | 0.198779 | 0.034243 | 0.197067 |
| CD300C    | 0.579594 | 0.538943 | -0.10491 | 0.517435 |
| DHX30     | 0.417406 | 0.412707 | -0.01634 | 0.440877 |
| FAM46D    | 0.27857  | 0.294388 | 0.079678 | 0.128394 |
| ZNF277    | 0.377789 | 0.386181 | 0.031695 | 0.343295 |
| MEA1      | 0.090878 | 0.093988 | 0.048538 | 0.111239 |
| GJD3      | 0.393343 | 0.399233 | 0.021443 | 0.404518 |
| PLEKHA4   | 0.327813 | 0.307289 | -0.09328 | 0.218045 |
| OR8K3     | 0.290972 | 0.357047 | 0.295234 | 0.013319 |
| RP1.177G6 | 0.457825 | 0.445989 | -0.03779 | 0.505455 |
| NUFIP1    | 0.091774 | 0.093945 | 0.033732 | 0.228663 |
| CDK3      | 0.803281 | 0.796508 | -0.01222 | 0.128381 |
| RPUSD1    | 0.284001 | 0.280209 | -0.01939 | 0.476154 |
| DEPDC5    | 0.227809 | 0.225284 | -0.01608 | 0.541829 |
| ACTN1     | 0.452097 | 0.456511 | 0.01402  | 0.413767 |
| OR2T29    | 0.542976 | 0.61696  | 0.184288 | 0.042081 |
| HNRNPU    | 0.123565 | 0.118214 | -0.06387 | 0.222427 |
| MLXIPL    | 0.212407 | 0.200967 | -0.07988 | 0.217177 |
| OR8U8     | 0.211849 | 0.230787 | 0.123526 | 0.052148 |
| CR1       | 0.061788 | 0.065544 | 0.085119 | 0.373754 |
| EPHB3     | 0.408007 | 0.41342  | 0.019016 | 0.324658 |
| GABRD     | 0.386783 | 0.41358  | 0.096641 | 0.250043 |
| MT1X      | 0.130979 | 0.121254 | -0.11129 | 0.265712 |
| KATNAL2   | 0.360932 | 0.36432  | 0.013478 | 0.837649 |
| NUDT12    | 0.264384 | 0.238441 | -0.149   | 0.288342 |
| REPS1     | 0.269853 | 0.271855 | 0.010666 | 0.888892 |
| NCAPG2    | 0.276673 | 0.280035 | 0.017425 | 0.512924 |
| SLC25A32  | 0.223925 | 0.228873 | 0.031533 | 0.557361 |
| DDX41     | 0.130314 | 0.1332   | 0.031597 | 0.198688 |
| E2F5      | 0.188685 | 0.19271  | 0.030446 | 0.411114 |
| MIR761    | 0.867789 | 0.890367 | 0.037056 | 0.929492 |
| SNORD56f  | 0.627371 | 0.650989 | 0.053314 | 0.109161 |
| SLC25A34  | 0.605159 | 0.581133 | -0.05845 | 0.146886 |
| SNORD87   | 0.435154 | 0.379569 | -0.19716 | 0.029823 |
| ANXA4     | 0.229771 | 0.225343 | -0.02807 | 0.293661 |
| PABPC5    | 0.166446 | 0.16433  | -0.01846 | 0.573108 |
| FBXL6     | 0.339989 | 0.334445 | -0.02372 | 0.377519 |
| ZFX       | 0.452777 | 0.474767 | 0.06842  | 0.026329 |
| PHLDA1    | 0.081097 | 0.079761 | -0.02397 | 0.977709 |

|          |          |          |          |          |
|----------|----------|----------|----------|----------|
| CIDEC    | 0.531479 | 0.509661 | -0.06048 | 0.358932 |
| ANAPC11  | 0.116496 | 0.118884 | 0.029265 | 0.428554 |
| CFC1B    | 0.801261 | 0.774193 | -0.04958 | 0.113341 |
| MS4A6E   | 0.14571  | 0.155551 | 0.094286 | 0.503968 |
| BMP8B    | 0.259155 | 0.263385 | 0.023362 | 0.526514 |
| ZNRF4    | 0.691239 | 0.682237 | -0.01891 | 0.224195 |
| MIR499   | 0.848101 | 0.841265 | -0.01168 | 0.311111 |
| ZBTB22   | 0.524985 | 0.547203 | 0.059798 | 0.035912 |
| FGD1     | 0.153545 | 0.164752 | 0.101634 | 0.199505 |
| SUV39H2  | 0.169754 | 0.167899 | -0.01585 | 0.498041 |
| MAP4K5   | 0.169868 | 0.17408  | 0.035334 | 0.342111 |
| MS4A10   | 0.353743 | 0.34151  | -0.05077 | 0.358932 |
| TMEM66   | 0.146483 | 0.150246 | 0.036598 | 0.278931 |
| OSTN     | 0.601323 | 0.63296  | 0.073973 | 0.378779 |
| ACOT6    | 0.205703 | 0.208565 | 0.019934 | 0.634787 |
| HULC     | 0.326611 | 0.359861 | 0.139864 | 0.087871 |
| ASTN1    | 0.330766 | 0.333823 | 0.013272 | 0.692228 |
| FAM196B  | 0.522814 | 0.516026 | -0.01885 | 0.649796 |
| CD59     | 0.359324 | 0.36025  | 0.003712 | 0.392808 |
| UBE4B    | 0.38939  | 0.389465 | 0.000276 | 0.962857 |
| BOP1     | 0.458883 | 0.448483 | -0.03308 | 0.156867 |
| LOC28468 | 0.221558 | 0.216552 | -0.03297 | 0.700837 |
| OR4D5    | 0.196182 | 0.201649 | 0.039653 | 0.610103 |
| TMEM74   | 0.394914 | 0.393816 | -0.00402 | 0.496565 |
| USP40    | 0.795296 | 0.790085 | -0.00948 | 0.39409  |
| UBN2     | 0.199773 | 0.190063 | -0.07188 | 0.019522 |
| OR8B8    | 0.527373 | 0.551109 | 0.063516 | 0.543373 |
| NAP1L6   | 0.357441 | 0.37109  | 0.054062 | 0.44226  |
| DYNLRB2  | 0.231009 | 0.216975 | -0.09042 | 0.100685 |
| RDX      | 0.234644 | 0.237522 | 0.017586 | 0.322376 |
| PDCD1LG2 | 0.492467 | 0.534628 | 0.118511 | 0.014398 |
| LRP10    | 0.215054 | 0.211883 | -0.02143 | 0.608471 |
| PRRT3    | 0.190555 | 0.187953 | -0.01983 | 0.108651 |
| MAGIX    | 0.462039 | 0.459027 | -0.00943 | 0.526514 |
| BATF3    | 0.056054 | 0.055173 | -0.02287 | 0.601963 |
| DOK1     | 0.604415 | 0.587115 | -0.0419  | 0.042553 |
| FOXRED2  | 0.469737 | 0.471036 | 0.003984 | 0.651472 |
| ISG15    | 0.413267 | 0.401486 | -0.04172 | 0.509931 |
| C6orf105 | 0.681254 | 0.658878 | -0.04818 | 0.141767 |
| ZNF430   | 0.238016 | 0.236251 | -0.01074 | 0.685368 |
| C15orf52 | 0.392618 | 0.387305 | -0.01966 | 0.568362 |
| TNNC1    | 0.453383 | 0.428148 | -0.08262 | 0.003915 |
| OR5B12   | 0.313646 | 0.302452 | -0.05243 | 0.250043 |
| ACOXL    | 0.321144 | 0.336678 | 0.068149 | 0.521966 |
| N4BP2L1  | 0.189414 | 0.192108 | 0.020374 | 0.21979  |
| MLF1     | 0.152454 | 0.154177 | 0.016213 | 0.338575 |
| OTUD7A   | 0.630249 | 0.634767 | 0.010305 | 0.618283 |
| AGBL2    | 0.255887 | 0.269746 | 0.076095 | 0.061845 |
| RCC1     | 0.056458 | 0.051488 | -0.13294 | 0.024199 |
| OR5D18   | 0.416866 | 0.451061 | 0.113739 | 0.173891 |
| HMP19    | 0.344081 | 0.345032 | 0.003981 | 0.631471 |
| OR7G1    | 0.302126 | 0.290449 | -0.05686 | 0.206108 |
| MIR526A2 | 0.138353 | 0.144845 | 0.066162 | 0.528038 |
| SLC15A2  | 0.441515 | 0.483768 | 0.131852 | 0.021553 |
| THAP1    | 0.268349 | 0.271272 | 0.015627 | 0.819501 |
| PFDN6    | 0.160153 | 0.163566 | 0.030417 | 0.297963 |

|           |          |          |          |          |
|-----------|----------|----------|----------|----------|
| AUP1      | 0.889004 | 0.886848 | -0.0035  | 0.26569  |
| ZNF366    | 0.703621 | 0.696581 | -0.01451 | 0.445023 |
| HIRIP3    | 0.178746 | 0.183033 | 0.034197 | 0.237793 |
| 9.Sep     | 0.439667 | 0.431583 | -0.02677 | 0.251965 |
| CDKAL1    | 0.468435 | 0.472779 | 0.013318 | 0.964713 |
| MRPS15    | 0.163102 | 0.160406 | -0.02404 | 0.749729 |
| PLIN1     | 0.440671 | 0.431192 | -0.03137 | 0.148189 |
| CAPNS1    | 0.190969 | 0.192063 | 0.008248 | 0.492153 |
| METT11D1  | 0.282691 | 0.277847 | -0.02493 | 0.421795 |
| ARAP2     | 0.221297 | 0.232485 | 0.071154 | 0.219792 |
| NUDT13    | 0.537229 | 0.540482 | 0.008709 | 0.573106 |
| PRAMEF2   | 0.338086 | 0.329627 | -0.03655 | 0.461861 |
| PTPRH     | 0.41764  | 0.394722 | -0.08142 | 0.021289 |
| ESPN      | 0.191383 | 0.178979 | -0.09668 | 0.117652 |
| HOMER2    | 0.383777 | 0.378392 | -0.02039 | 0.598729 |
| GSTA5     | 0.466414 | 0.513535 | 0.138853 | 0.038893 |
| C5orf58   | 0.621271 | 0.612779 | -0.01986 | 0.412437 |
| ZNF91     | 0.221102 | 0.233482 | 0.078602 | 0.011679 |
| GAGE2A    | 0.31658  | 0.343631 | 0.118289 | 0.081976 |
| MESDC1    | 0.20153  | 0.199805 | -0.0124  | 0.785294 |
| KLF15     | 0.319452 | 0.307703 | -0.05406 | 0.035912 |
| P2RY2     | 0.329845 | 0.31864  | -0.04986 | 0.050479 |
| SCARF2    | 0.213945 | 0.227311 | 0.087427 | 0.252931 |
| TNFRSF19  | 0.357916 | 0.3611   | 0.012774 | 0.644776 |
| C17orf57  | 0.117158 | 0.112043 | -0.06441 | 0.664949 |
| AOC2      | 0.510509 | 0.527263 | 0.046588 | 0.08874  |
| C17orf105 | 0.460239 | 0.434372 | -0.08345 | 0.002901 |
| C15orf5   | 0.397069 | 0.41588  | 0.066777 | 0.477596 |
| MPPED2    | 0.363415 | 0.359949 | -0.01383 | 0.326952 |
| TREH      | 0.476371 | 0.459095 | -0.05329 | 0.059605 |
| IFNA8     | 0.347042 | 0.308866 | -0.16813 | 0.129568 |
| HLA.DOA   | 0.407671 | 0.421206 | 0.047123 | 0.532615 |
| SUCLG2    | 0.294339 | 0.29541  | 0.005241 | 0.629816 |
| ACADVL    | 0.662477 | 0.667794 | 0.011534 | 0.331568 |
| MGC7208   | 0.086606 | 0.08887  | 0.037232 | 0.386386 |
| MNS1      | 0.064261 | 0.053714 | -0.25865 | 0.326944 |
| PCDHAC2   | 0.088585 | 0.097544 | 0.138989 | 0.100683 |
| DPH2      | 0.18968  | 0.192538 | 0.021576 | 0.329254 |
| C15orf29  | 0.194281 | 0.188828 | -0.04108 | 0.100683 |
| LOC92249  | 0.178041 | 0.169031 | -0.07492 | 0.310012 |
| PENK      | 0.099847 | 0.101613 | 0.025298 | 0.571523 |
| DLG5      | 0.587931 | 0.5996   | 0.028352 | 0.053572 |
| CIC       | 0.132395 | 0.133423 | 0.011162 | 0.66495  |
| NXF1      | 0.207438 | 0.209681 | 0.015519 | 0.415098 |
| MYCL1     | 0.220393 | 0.217071 | -0.02191 | 0.563634 |
| TSNAX.DIS | 0.266761 | 0.261652 | -0.0279  | 0.149499 |
| LOC64516  | 0.268232 | 0.27452  | 0.033426 | 0.571524 |
| PEMT      | 0.511772 | 0.506033 | -0.01627 | 0.22419  |
| ERI2      | 0.286465 | 0.290618 | 0.020763 | 0.396689 |
| PQBP1     | 0.157298 | 0.177343 | 0.173042 | 0.266713 |
| ZNF92     | 0.159712 | 0.158488 | -0.0111  | 0.763897 |
| MRPL53    | 0.036252 | 0.03642  | 0.006633 | 0.508409 |
| INPP5E    | 0.527977 | 0.521473 | -0.01788 | 0.245279 |
| ZBTB32    | 0.451431 | 0.451825 | 0.001258 | 0.953581 |
| HARS      | 0.094128 | 0.094231 | 0.001586 | 0.658198 |
| THUMPD2   | 0.323836 | 0.322993 | -0.00376 | 0.799651 |

|           |          |          |          |          |
|-----------|----------|----------|----------|----------|
| TGM4      | 0.523241 | 0.513632 | -0.02674 | 0.168788 |
| FNDC4     | 0.264147 | 0.251358 | -0.0716  | 0.098767 |
| TMEM120   | 0.381194 | 0.376034 | -0.01966 | 0.349256 |
| ST14      | 0.537813 | 0.521894 | -0.04335 | 0.109164 |
| HNRNPF    | 0.189773 | 0.182757 | -0.05435 | 0.146888 |
| DMRTA2    | 0.093454 | 0.093165 | -0.00447 | 0.74973  |
| NAT14     | 0.2736   | 0.259942 | -0.07388 | 0.117107 |
| KIAA1804  | 0.28009  | 0.270073 | -0.05254 | 0.104109 |
| OR6N1     | 0.13242  | 0.123895 | -0.096   | 0.481939 |
| LAMB1     | 0.413381 | 0.417984 | 0.015974 | 0.755033 |
| NUAK2     | 0.317676 | 0.312548 | -0.02348 | 0.447811 |
| ORAOV1    | 0.423214 | 0.41842  | -0.01644 | 0.618283 |
| AGAP4     | 0.396944 | 0.390322 | -0.02427 | 0.541829 |
| DEFB119   | 0.134243 | 0.125273 | -0.09977 | 0.095945 |
| LOC65125  | 0.268576 | 0.26645  | -0.01147 | 0.613369 |
| PPP4R2    | 0.270582 | 0.277778 | 0.037867 | 0.371259 |
| C11orf63  | 0.393925 | 0.38608  | -0.02902 | 0.24813  |
| NME5      | 0.12647  | 0.117466 | -0.10655 | 0.130158 |
| RPL31     | 0.223121 | 0.227649 | 0.028984 | 0.427198 |
| HPCAL1    | 0.494976 | 0.48494  | -0.02955 | 0.087868 |
| OSTBETA   | 0.366572 | 0.352303 | -0.05728 | 0.067925 |
| SORBS3    | 0.263566 | 0.252165 | -0.06379 | 0.074114 |
| TYMP      | 0.191286 | 0.196035 | 0.035377 | 0.86503  |
| SNORA22   | 0.855916 | 0.876279 | 0.033922 | 0.374992 |
| RGS8      | 0.585548 | 0.587299 | 0.004307 | 0.728638 |
| C1orf49   | 0.834847 | 0.81794  | -0.02952 | 0.001986 |
| CD2       | 0.870186 | 0.873965 | 0.006252 | 0.692208 |
| OR10A5    | 0.407389 | 0.430726 | 0.080363 | 0.272776 |
| SNX2      | 0.192739 | 0.198238 | 0.040587 | 0.346862 |
| CCDC88C   | 0.546712 | 0.57269  | 0.066974 | 0.084043 |
| SDR9C7    | 0.69624  | 0.724262 | 0.056926 | 0.20032  |
| ZNF365    | 0.286343 | 0.292169 | 0.02906  | 0.268724 |
| C10orf120 | 0.735749 | 0.704299 | -0.06302 | 0.284132 |
| ARL14     | 0.765547 | 0.79779  | 0.059518 | 0.013405 |
| C5orf46   | 0.821225 | 0.796264 | -0.04453 | 0.043267 |
| FBN1      | 0.462923 | 0.470758 | 0.024214 | 0.170233 |
| ALG2      | 0.173845 | 0.168489 | -0.04515 | 0.254869 |
| CCT8L2    | 0.293784 | 0.287316 | -0.03212 | 0.216311 |
| GABRB1    | 0.300789 | 0.302443 | 0.007912 | 0.805052 |
| FAM138E   | 0.456663 | 0.466452 | 0.030599 | 0.532614 |
| FMO1      | 0.18428  | 0.170292 | -0.11389 | 0.167353 |
| SOS1      | 0.305892 | 0.311569 | 0.02653  | 0.60035  |
| P2RY4     | 0.616424 | 0.612905 | -0.00826 | 0.925794 |
| HIST1H3C  | 0.134783 | 0.19163  | 0.507684 | 0.143671 |
| GSTCD     | 0.200879 | 0.206138 | 0.037281 | 0.537212 |
| CSF1R     | 0.601705 | 0.585978 | -0.03821 | 0.051029 |
| LOC10013  | 0.494728 | 0.559038 | 0.176312 | 0.053573 |
| MARK4     | 0.335025 | 0.327277 | -0.03375 | 0.191466 |
| RYR1      | 0.320235 | 0.337246 | 0.07467  | 0.141768 |
| CCDC159   | 0.331945 | 0.323704 | -0.03627 | 0.223311 |
| MAD1L1    | 0.573836 | 0.566904 | -0.01753 | 0.159611 |
| ARAF      | 0.230262 | 0.244488 | 0.086486 | 0.096879 |
| MICA      | 0.115028 | 0.111179 | -0.04911 | 0.46328  |
| Magmas    | 0.041707 | 0.041974 | 0.009214 | 0.147519 |
| HEPH      | 0.249811 | 0.231679 | -0.10871 | 0.068987 |
| CSF1      | 0.232825 | 0.225248 | -0.04773 | 0.275842 |

|           |          |          |          |          |
|-----------|----------|----------|----------|----------|
| RRS1      | 0.089842 | 0.079633 | -0.17402 | 0.012723 |
| KRT32     | 0.418307 | 0.41322  | -0.01765 | 0.666642 |
| PRLR      | 0.332002 | 0.315306 | -0.07444 | 0.452    |
| ITGB3BP   | 0.100362 | 0.102461 | 0.029864 | 0.314471 |
| LRRC10    | 0.227116 | 0.234417 | 0.045646 | 0.619925 |
| ODF3      | 0.399256 | 0.43173  | 0.112814 | 0.09782  |
| METTL2B   | 0.102584 | 0.102806 | 0.003125 | 0.746199 |
| AFP       | 0.225553 | 0.235003 | 0.059214 | 0.587458 |
| LASS2     | 0.183466 | 0.185041 | 0.012333 | 0.876029 |
| TUBGCP4   | 0.289681 | 0.300885 | 0.054743 | 0.162395 |
| PLAC1L    | 0.402136 | 0.486646 | 0.27519  | 0.061522 |
| C17orf76  | 0.352579 | 0.345733 | -0.02829 | 0.273794 |
| KPNA7     | 0.227544 | 0.204388 | -0.15484 | 0.074491 |
| ABCC4     | 0.339533 | 0.378447 | 0.156537 | 0.003635 |
| TUG1      | 0.647232 | 0.676709 | 0.064254 | 0.236868 |
| LDHB      | 0.104199 | 0.10413  | -0.00096 | 0.951726 |
| CX3CL1    | 0.554789 | 0.546657 | -0.0213  | 0.302306 |
| GMCL1     | 0.170571 | 0.171315 | 0.006279 | 0.63811  |
| CDK15     | 0.620396 | 0.616591 | -0.00888 | 0.17463  |
| CD84      | 0.189663 | 0.171417 | -0.14593 | 0.091389 |
| CNTD2     | 0.324719 | 0.344364 | 0.084741 | 0.176858 |
| LILRB5    | 0.219554 | 0.216091 | -0.02294 | 0.461862 |
| MIR188    | 0.804016 | 0.800591 | -0.00616 | 0.855881 |
| GOPC      | 0.201308 | 0.206097 | 0.033915 | 0.297965 |
| ELFN2     | 0.415247 | 0.384007 | -0.11284 | 0.060556 |
| NKX3.1    | 0.162456 | 0.16166  | -0.00709 | 0.890733 |
| AZI2      | 0.168911 | 0.171322 | 0.020441 | 0.395392 |
| EDN3      | 0.195404 | 0.192493 | -0.02166 | 0.63811  |
| SERAC1    | 0.057544 | 0.060706 | 0.077171 | 0.299041 |
| UTP3      | 0.053268 | 0.054578 | 0.03504  | 0.207777 |
| ARPC3     | 0.087739 | 0.088978 | 0.020244 | 0.515926 |
| GRPEL1    | 0.15596  | 0.152291 | -0.03434 | 0.332731 |
| SMPX      | 0.754533 | 0.741635 | -0.02487 | 0.639769 |
| RLN1      | 0.540279 | 0.53993  | -0.00093 | 0.676832 |
| TMEM198   | 0.476257 | 0.467231 | -0.02761 | 0.449205 |
| ARMCX3    | 0.170996 | 0.182454 | 0.093575 | 0.333895 |
| LOC10013  | 0.238607 | 0.239954 | 0.008123 | 0.866861 |
| MYL9      | 0.587918 | 0.600036 | 0.029434 | 0.225087 |
| NCRNA00   | 0.278227 | 0.283325 | 0.026196 | 0.558926 |
| INA       | 0.096128 | 0.097624 | 0.022284 | 0.453399 |
| FLJ41350  | 0.162334 | 0.157971 | -0.0393  | 0.824936 |
| ITK       | 0.578785 | 0.543196 | -0.09155 | 0.095947 |
| FBXO22    | 0.154781 | 0.165084 | 0.09298  | 0.010221 |
| GABARAPI  | 0.792908 | 0.783664 | -0.01692 | 0.098288 |
| CLEC4M    | 0.272065 | 0.26722  | -0.02592 | 0.338575 |
| KRT20     | 0.681828 | 0.659395 | -0.04826 | 0.224194 |
| TOM1      | 0.234442 | 0.232368 | -0.01282 | 0.55112  |
| ARMCX4    | 0.248886 | 0.254082 | 0.029809 | 0.404518 |
| SCTR      | 0.162652 | 0.166475 | 0.033522 | 0.292592 |
| IKBK      | 0.247389 | 0.261239 | 0.078585 | 0.22331  |
| PPIL4     | 0.106458 | 0.109554 | 0.041353 | 0.299043 |
| WAC       | 0.271541 | 0.276568 | 0.026465 | 0.584253 |
| HOXA1     | 0.119031 | 0.126069 | 0.082873 | 0.136173 |
| ADC       | 0.174694 | 0.170869 | -0.03194 | 0.304495 |
| RAB11FIP1 | 0.422927 | 0.416917 | -0.02065 | 0.649796 |
| CGB7      | 0.352971 | 0.356781 | 0.015488 | 0.537212 |

|           |          |          |          |          |
|-----------|----------|----------|----------|----------|
| SPANXA2   | 0.608219 | 0.716541 | 0.236458 | 0.016263 |
| DLGAP2    | 0.695007 | 0.691549 | -0.0072  | 0.707747 |
| MMP3      | 0.442546 | 0.447821 | 0.017093 | 0.806855 |
| SUMO3     | 0.467181 | 0.492962 | 0.077493 | 0.008927 |
| SNHG11    | 0.19008  | 0.179257 | -0.08457 | 0.00677  |
| GJA1      | 0.322797 | 0.350959 | 0.120674 | 0.098768 |
| MIR130A   | 0.475186 | 0.469496 | -0.01738 | 0.700837 |
| NDUFA7    | 0.246033 | 0.241138 | -0.02899 | 0.569939 |
| TCEAL6    | 0.341794 | 0.341665 | -0.00055 | 0.723397 |
| S100A8    | 0.403973 | 0.355708 | -0.18356 | 0.087438 |
| HGSNAT    | 0.295133 | 0.295846 | 0.003482 | 0.656514 |
| PCDHB12   | 0.542619 | 0.544428 | 0.004802 | 0.899941 |
| C19orf2   | 0.245233 | 0.235284 | -0.05975 | 0.061521 |
| GNAZ      | 0.790043 | 0.751943 | -0.07131 | 0.051585 |
| ZCCHC6    | 0.143672 | 0.140997 | -0.02712 | 0.80505  |
| PTPN6     | 0.473316 | 0.488583 | 0.0458   | 0.213726 |
| C6orf154  | 0.359031 | 0.376633 | 0.069052 | 0.043031 |
| TNFRSF10I | 0.282979 | 0.260126 | -0.12148 | 0.201139 |
| IL28RA    | 0.212493 | 0.193956 | -0.13168 | 0.074114 |
| ZNF519    | 0.122727 | 0.116259 | -0.07811 | 0.187539 |
| GRIK4     | 0.461886 | 0.448979 | -0.04089 | 0.143671 |
| DCT       | 0.565261 | 0.543807 | -0.05582 | 0.093646 |
| CREBBP    | 0.677759 | 0.675451 | -0.00492 | 0.566781 |
| DOT1L     | 0.639175 | 0.628121 | -0.02517 | 0.073362 |
| C4orf23   | 0.713626 | 0.702857 | -0.02194 | 0.067221 |
| CXorf22   | 0.097736 | 0.096925 | -0.01202 | 0.927644 |
| SUZ12P    | 0.148823 | 0.157129 | 0.078354 | 0.138638 |
| SLC22A24  | 0.180325 | 0.173187 | -0.05827 | 0.367534 |
| TRIM48    | 0.173807 | 0.163033 | -0.09232 | 0.44642  |
| CCKBR     | 0.383227 | 0.403813 | 0.075491 | 0.06217  |
| LG13      | 0.359695 | 0.346708 | -0.05305 | 0.067227 |
| RGMA      | 0.45529  | 0.442409 | -0.0414  | 0.394099 |
| FNBP1L    | 0.312494 | 0.30987  | -0.01216 | 0.574693 |
| TAX1BP3   | 0.403748 | 0.400258 | -0.01253 | 0.739159 |
| TSC22D1   | 0.176489 | 0.179047 | 0.020765 | 0.273796 |
| PCYT1B    | 0.371059 | 0.371869 | 0.003147 | 0.695666 |
| NSUN5B    | 0.210536 | 0.199026 | -0.08111 | 0.039335 |
| DHDPSL    | 0.440095 | 0.427243 | -0.04276 | 0.182141 |
| GPR81     | 0.570278 | 0.598122 | 0.068774 | 0.520452 |
| DNAJC25   | 0.045897 | 0.045971 | 0.002328 | 0.839465 |
| PCSK6     | 0.516079 | 0.489389 | -0.07661 | 0.135562 |
| SETBP1    | 0.502522 | 0.498663 | -0.01112 | 0.477596 |
| FHL5      | 0.56577  | 0.584558 | 0.047132 | 0.306695 |
| KRT34     | 0.485901 | 0.451078 | -0.10728 | 0.238722 |
| TEX11     | 0.443843 | 0.460373 | 0.052754 | 0.503968 |
| IL1B      | 0.35266  | 0.361753 | 0.036725 | 0.508436 |

ps in the total group(N=130).
